# Supplementary material for: GENE-Counter: A Computational Pipeline for the Analysis of RNA-Seq Data for Gene Expression Differences
Source: PubMed Central journal article supplement (PMC3188579; doi:10.1371/journal.pone.0025279), 2011-10-06
Supplement: pone.0025279.s001.pdf [file pone.0025279.s001.pdf]

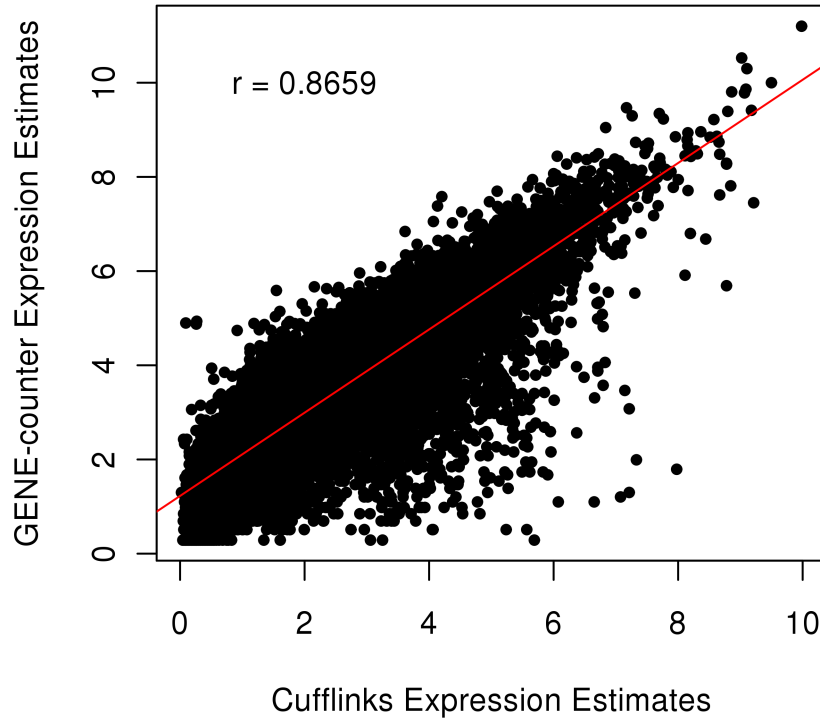

**Fig. S1: Comparison of the log of the mean gene expression values determined by GENE-counter and Cufflinks.** The average of the log transformed normalized expression values derived for genes from Cufflinks (x-axis) and GENE-counter (y-axis) were plotted against each (only  $\Delta hrcC$  shown; mock was similar ( $r = 0.86$ )). Only genes tested in both packages with an estimated expression  $> 0$  by either package ( $\Delta hrcC = 19168$  and mock = 19047) were included. In cases where a gene had more than one expressed isoform, the isoform with the highest expression level was used. All log-transformed values were treated as described in the main text. Pearson's correlation coefficients and the scatter plot were calculated and created as described in the main text.
