# Supplementary material for: GENE-Counter: A Computational Pipeline for the Analysis of RNA-Seq Data for Gene Expression Differences
Source: PLoS One. 2011 Oct 6;6(10):e25279. doi: 10.1371/journal.pone.0025279 (PMC3188579; doi:10.1371/journal.pone.0025279)
Supplement: Table S1 — Differentially expressed genes identified using GENE-counter running NBPSeq. (XLS) [file pone.0025279.s002.xls]

## Sheet: DE genes
Table S1: Differentially expressed genes identified using GENE-counter running NBPSeq*
Gene	MgCl2 raw	MgCl2 raw	MgCl2 raw	hrcC raw	hrcC raw	hrcC raw	MgCl2 norm	MgCl2 norm	MgCl2 norm	hrcC norm	hrcC norm	hrcC norm	P-val	Q-val	Functional Annotation	GO Terms
AT1G02360	18	19	55	150	161	574	14	13	24	88	161	214	6.06243e-07	0.000179812	protein_coding chitinase, putative chitinase, putative; FUNCTIONS IN: chitinase activity; INVOLVED IN: cell wall macromolecule catabolic process; LOCATED IN: endomembrane system; EXPRESSED IN: stem, leaf whorl, cotyledon, root; CONTAINS InterPro DOMAIN/s: Glycoside hydrolase, family 19 (InterPro:IPR016283), Glycoside hydrolase, family 19, catalytic (InterPro:IPR000726); BEST Arabidopsis thaliana …	GO:0012505|endomembrane system GO:0016998|cell wall catabolic process GO:0004568|chitinase activity
AT1G02920	307	229	809	2991	1543	7705	225	166	322	1723	1543	2828	8.2278e-15	1.52523e-11	protein_coding GSTF7; copper ion binding / glutathione binding / glutathione transferase Encodes glutathione transferase belonging to the phi class of GSTs. Naming convention according to Wagner et al. (2002). GSTF7; FUNCTIONS IN: glutathione transferase activity, copper ion binding, glutathione binding; INVOLVED IN: response to cadmium ion, response to salt stress, defense response to bacterium,…	GO:0004364|glutathione transferase activity GO:0005634|nucleus GO:0009407|toxin catabolic process GO:0005737|cytoplasm
AT1G02930	1613	1099	2129	7120	5984	11950	1107	763	821	4134	5984	4351	2.52918e-13	3.02482e-10	protein_coding ATGSTF6 (GLUTATHIONE S-TRANSFERASE); copper ion binding / glutathione binding / glutathione transferase Encodes glutathione transferase belonging to the phi class of GSTs. Naming convention according to Wagner et al. (2002). GLUTATHIONE S-TRANSFERASE (ATGSTF6); FUNCTIONS IN: glutathione transferase activity, copper ion binding, glutathione binding; INVOLVED IN: in 7 processes; LOCA…	GO:0006979|response to oxidative stress GO:0004364|glutathione transferase activity GO:0009407|toxin catabolic process GO:0009414|response to water deprivation GO:0006950|response to stress GO:0005739|mitochondrion GO:0005737|cytoplasm
AT1G05010	497	258	674	2567	616	2417	370	187	281	1487	616	868	1.26138e-05	0.00219399	protein_coding EFE (ETHYLENE-FORMING ENZYME); 1-aminocyclopropane-1-carboxylate oxidase Encodes 1-aminocyclopropane-1-carboxylate oxidase ETHYLENE-FORMING ENZYME (EFE); FUNCTIONS IN: 1-aminocyclopropane-1-carboxylate oxidase activity; INVOLVED IN: response to fungus, ethylene biosynthetic process; EXPRESSED IN: 22 plant structures; EXPRESSED DURING: 13 growth stages; CONTAINS InterPro DOMAIN/s: 2…	GO:0009693|ethylene biosynthetic process GO:0009815|1-aminocyclopropane-1-carboxylate oxidase activity
AT1G05300	58	27	150	487	238	1133	37	17	52	285	238	407	1.80002e-08	8.85592e-06	protein_coding ZIP5; cation transmembrane transporter/ metal ion transmembrane transporter member of Fe(II) transporter isolog family ZIP5; FUNCTIONS IN: cation transmembrane transporter activity, metal ion transmembrane transporter activity; INVOLVED IN: response to zinc ion, cation transport; LOCATED IN: endomembrane system, integral to membrane, membrane; EXPRESSED IN: 10 plant structures; EXP…	GO:0012505|endomembrane system GO:0016020|membrane GO:0046873|metal ion transmembrane transporter activity GO:0016021|integral to membrane GO:0006812|cation transport GO:0008324|cation transmembrane transporter activity
AT1G06620	74	53	321	720	242	3285	47	37	116	424	242	1181	8.25126e-11	6.65034e-08	protein_coding 2-oxoglutarate-dependent dioxygenase, putative encodes a protein whose sequence is similar to a 2-oxoglutarate-dependent dioxygenase 2-oxoglutarate-dependent dioxygenase, putative; FUNCTIONS IN: 2-oxoglutarate-dependent dioxygenase activity; INVOLVED IN: biological_process unknown; LOCATED IN: cellular_component unknown; EXPRESSED IN: 18 plant structures; EXPRESSED DURING: 12 growt…	GO:0005575|cellular_component GO:0010302|2-oxoglutarate-dependent dioxygenase activity GO:0008150|biological_process
AT1G07160	1	11	16	39	283	165	0	8	5	26	283	56	2.30544e-10	1.64374e-07	protein_coding protein phosphatase 2C, putative / PP2C, putative protein phosphatase 2C, putative / PP2C, putative; FUNCTIONS IN: protein serine/threonine phosphatase activity, catalytic activity; INVOLVED IN: protein amino acid dephosphorylation; LOCATED IN: chloroplast, protein serine/threonine phosphatase complex; EXPRESSED IN: sperm cell; CONTAINS InterPro DOMAIN/s: Protein phosphatase 2C, ma…	GO:0008287|protein serine/threonine phosphatase complex GO:0006470|protein amino acid dephosphorylation GO:0004722|protein serine/threonine phosphatase activity GO:0009507|chloroplast
AT1G07890	50	34	59	108	243	197	38	23	26	60	243	68	0.000708354	0.0495514	protein_coding APX1 (ascorbate peroxidase 1); L-ascorbate peroxidase Encodes a cytosolic ascorbate peroxidase APX1. Ascorbate peroxidases are enzymes that scavenge hydrogen peroxide in plant cells. Eight types of APX have been described for Arabidopsis: three cytosolic (APX1, APX2, APX6), two chloroplastic types (stromal sAPX, thylakoid tAPX), and three microsomal (APX3, APX4, APX5) isoforms. At …	GO:0016688|L-ascorbate peroxidase activity GO:0005829|cytosol GO:0009408|response to heat GO:0009793|embryonic development ending in seed dormancy GO:0000302|response to reactive oxygen species
AT1G08090	10	19	43	99	61	313	8	12	18	54	61	96	0.000504783	0.0384288	protein_coding ATNRT2:1 (NITRATE TRANSPORTER 2:1); nitrate transmembrane transporter High-affinity nitrate transporter. Up-regulated by nitrate. Functions as a repressor of lateral root initiation independently of nitrate uptake. NITRATE TRANSPORTER 2:1 (ATNRT2:1); FUNCTIONS IN: nitrate transmembrane transporter activity; INVOLVED IN: nitrate transport, response to nitrate, lateral root developme…	GO:0015112|nitrate transmembrane transporter activity GO:0016020|membrane GO:0048527|lateral root development GO:0010167|response to nitrate GO:0015706|nitrate transport
AT1G09560	2884	2255	3987	6368	4030	16855	1970	1583	1496	3690	4030	6092	4.32083e-06	0.000885054	protein_coding GLP5 (GERMIN-LIKE PROTEIN 5); manganese ion binding / nutrient reservoir germin-like protein (GLP5) GERMIN-LIKE PROTEIN 5 (GLP5); FUNCTIONS IN: manganese ion binding, nutrient reservoir activity; INVOLVED IN: response to cold; LOCATED IN: cell wall, nucleus; EXPRESSED IN: 22 plant structures; EXPRESSED DURING: 14 growth stages; CONTAINS InterPro DOMAIN/s: Cupin, RmlC-type (InterPro…	GO:0012505|endomembrane system GO:0048046|apoplast GO:0046872|metal ion binding GO:0045735|nutrient reservoir activity GO:0009409|response to cold GO:0030145|manganese ion binding
AT1G09750	441	592	1167	125	78	192	315	437	442	70	78	81	2.61432e-06	0.000591012	protein_coding chloroplast nucleoid DNA-binding protein-related chloroplast nucleoid DNA-binding protein-related; FUNCTIONS IN: aspartic-type endopeptidase activity; INVOLVED IN: proteolysis; LOCATED IN: apoplast, cell wall, plant-type cell wall; EXPRESSED IN: 22 plant structures; EXPRESSED DURING: 14 growth stages; CONTAINS InterPro DOMAIN/s: Peptidase aspartic, catalytic (InterPro:IPR009007), P…	GO:0012505|endomembrane system GO:0006508|proteolysis
AT1G09970	2224	1863	2668	6430	1887	9895	1518	1309	1031	3832	1887	3577	0.000144933	0.0148606	protein_coding LRR XI-23; ATP binding / kinase/ protein kinase/ protein serine/threonine kinase LRR XI-23; FUNCTIONS IN: protein serine/threonine kinase activity, protein kinase activity, kinase activity, ATP binding; INVOLVED IN: protein amino acid autophosphorylation, transmembrane receptor protein tyrosine kinase signaling pathway, protein amino acid phosphorylation; LOCATED IN: plasma membran…	GO:0012505|endomembrane system GO:0007169|transmembrane receptor protein tyrosine kinase signaling pathway GO:0004674|protein serine/threonine kinase activity GO:0005524|ATP binding GO:0016301|kinase activity GO:0006468|protein amino acid phosphorylation
AT1G10140	262	124	384	817	491	2707	184	94	155	483	491	979	2.18902e-06	0.000510428	protein_coding FUNCTIONS IN: molecular_function unknown; INVOLVED IN: biological_process unknown; LOCATED IN: plasma membrane; EXPRESSED IN: 23 plant structures; EXPRESSED DURING: 13 growth stages; CONTAINS InterPro DOMAIN/s: Uncharacterised conserved protein UCP031279 (InterPro:IPR016972); BEST Arabidopsis thaliana protein match is: unknown protein (TAIR:AT1G58420.1); Has 38 Blast hits to 38 pro…	GO:0003674|molecular_function GO:0008150|biological_process
AT1G10585	464	494	909	2834	785	2211	333	345	357	1661	785	764	6.26578e-05	0.00800161	protein_coding transcription factor transcription factor; FUNCTIONS IN: transcription factor activity; INVOLVED IN: regulation of transcription; LOCATED IN: nucleus; EXPRESSED IN: 7 plant structures; EXPRESSED DURING: LP.06 six leaves visible, 4 anthesis, LP.10 ten leaves visible, petal differentiation and expansion stage, LP.08 eight leaves visible; CONTAINS InterPro DOMAIN/s: Basic helix-loop-h…	GO:0005634|nucleus GO:0045449|regulation of transcription GO:0003700|transcription factor activity
AT1G11260	54	22	50	179	117	219	32	12	21	107	117	83	0.000544543	0.0404588	protein_coding STP1 (SUGAR TRANSPORTER 1); carbohydrate transmembrane transporter/ sugar:hydrogen symporter Encodes a H+/hexose cotransporter. SUGAR TRANSPORTER 1 (STP1); FUNCTIONS IN: carbohydrate transmembrane transporter activity, sugar:hydrogen symporter activity; INVOLVED IN: transport, transmembrane transport; LOCATED IN: nucleus, plasma membrane, vacuole, membrane; EXPRESSED IN: 24 plant s…	GO:0016020|membrane GO:0006810|transport GO:0008643|carbohydrate transport GO:0015144|carbohydrate transmembrane transporter activity GO:0005351|sugar:hydrogen symporter activity
AT1G12000	6	3	3	34	21	14	2	1	1	26	21	8	0.000687722	0.0485556	protein_coding pyrophosphate--fructose-6-phosphate 1-phosphotransferase beta subunit, putative / pyrophosphate-dependent 6-phosphofructose-1-kinase, putative pyrophosphate--fructose-6-phosphate 1-phosphotransferase beta subunit, putative / pyrophosphate-dependent 6-phosphofructose-1-kinase, putative; FUNCTIONS IN: diphosphate-fructose-6-phosphate 1-phosphotransferase activity; INVOLVED IN: respon…	GO:0010318|pyrophosphate-dependent phosphofructokinase complex beta-subunit complex GO:0006096|glycolysis GO:0047334|diphosphate-fructose-6-phosphate 1-phosphotransferase activity
AT1G12090	4872	2655	15571	1990	1253	2903	3382	1851	5993	1183	1253	1089	4.52023e-07	0.000139656	protein_coding ELP (EXTENSIN-LIKE PROTEIN); lipid binding extensin-like protein (ELP) EXTENSIN-LIKE PROTEIN (ELP); FUNCTIONS IN: lipid binding; INVOLVED IN: lipid transport; LOCATED IN: endomembrane system; EXPRESSED IN: 22 plant structures; EXPRESSED DURING: 13 growth stages; CONTAINS InterPro DOMAIN/s: Bifunctional inhibitor/plant lipid transfer protein/seed storage (InterPro:IPR016140), Plant …	GO:0012505|endomembrane system GO:0008289|lipid binding GO:0006869|lipid transport
AT1G12940	2	5	21	134	19	241	1	2	9	83	19	74	2.89206e-06	0.000638232	protein_coding ATNRT2.5 (nitrate transporter2.5); nitrate transmembrane transporter member of High affinity nitrate transporter family nitrate transporter2.5 (ATNRT2.5); FUNCTIONS IN: nitrate transmembrane transporter activity; LOCATED IN: plasma membrane; EXPRESSED IN: stem, inflorescence meristem; CONTAINS InterPro DOMAIN/s: Major facilitator superfamily MFS-1 (InterPro:IPR011701), Major facili…	GO:0015112|nitrate transmembrane transporter activity
AT1G13110	152	136	224	699	315	732	113	85	73	423	315	284	0.000155574	0.0156737	protein_coding CYP71B7; electron carrier/ heme binding / iron ion binding / monooxygenase/ oxygen binding member of CYP71B CYP71B7; FUNCTIONS IN: electron carrier activity, monooxygenase activity, iron ion binding, oxygen binding, heme binding; EXPRESSED IN: 22 plant structures; EXPRESSED DURING: 13 growth stages; CONTAINS InterPro DOMAIN/s: Cytochrome P450 (InterPro:IPR001128), Cytochrome P450, …	GO:0019825|oxygen binding
AT1G13930	7212	8603	10217	4239	1882	7511	5004	6030	3970	2438	1882	2757	0.000380076	0.0310434	protein_coding Involved in response to salt stress. Knockout mutants are hypersensitive to salt stress. FUNCTIONS IN: molecular_function unknown; INVOLVED IN: response to cadmium ion, response to salt stress; LOCATED IN: chloroplast, chloroplast stroma, plasma membrane, chloroplast envelope; EXPRESSED IN: 27 plant structures; EXPRESSED DURING: 14 growth stages; BEST Arabidopsis thaliana protein m…	GO:0003674|molecular_function GO:0005575|cellular_component GO:0009651|response to salt stress GO:0008150|biological_process
AT1G14150	730	1166	1038	365	200	470	480	806	400	197	200	164	0.000477685	0.0368195	protein_coding oxygen evolving enhancer 3 (PsbQ) family protein oxygen evolving enhancer 3 (PsbQ) family protein; FUNCTIONS IN: calcium ion binding; INVOLVED IN: photosynthesis; LOCATED IN: chloroplast thylakoid membrane, chloroplast photosystem II, chloroplast thylakoid lumen, chloroplast; EXPRESSED IN: 22 plant structures; EXPRESSED DURING: 13 growth stages; CONTAINS InterPro DOMAIN/s: Photosys…	GO:0030095|chloroplast photosystem II GO:0009535|chloroplast thylakoid membrane GO:0009543|chloroplast thylakoid lumen GO:0005509|calcium ion binding GO:0015979|photosynthesis
AT1G14540	5	48	5	47	271	99	4	33	4	31	271	36	6.05527e-06	0.00120699	protein_coding anionic peroxidase, putative anionic peroxidase, putative; FUNCTIONS IN: electron carrier activity, peroxidase activity, heme binding; INVOLVED IN: response to oxidative stress; LOCATED IN: endomembrane system; EXPRESSED IN: leaf apex, sepal, root, stamen; EXPRESSED DURING: 4 anthesis; CONTAINS InterPro DOMAIN/s: Haem peroxidase (InterPro:IPR010255), Plant peroxidase (InterPro:IPR0…	GO:0012505|endomembrane system GO:0006979|response to oxidative stress GO:0004601|peroxidase activity
AT1G14870	80	45	54	302	251	580	56	31	18	167	251	235	4.58969e-06	0.000934959	protein_coding FUNCTIONS IN: molecular_function unknown; INVOLVED IN: response to oxidative stress; LOCATED IN: plasma membrane; EXPRESSED IN: callus; CONTAINS InterPro DOMAIN/s: EGF-type aspartate/asparagine hydroxylation conserved site (InterPro:IPR000152), Protein of unknown function Cys-rich (InterPro:IPR006461); BEST Arabidopsis thaliana protein match is: unknown protein (TAIR:AT5G35525.1); …	GO:0006979|response to oxidative stress GO:0003674|molecular_function GO:0008150|biological_process GO:0005886|plasma membrane
AT1G15520	16	23	79	226	79	392	11	16	34	141	79	156	4.03348e-05	0.00570769	protein_coding PDR12 (PLEIOTROPIC DRUG RESISTANCE 12); ATPase, coupled to transmembrane movement of substances ABC transporter family involved in resistant to lead. Localizes to plasma membrane. Upregulated by lead. Expressed in leaves, flowers. Not expressed in roots. PLEIOTROPIC DRUG RESISTANCE 12 (PDR12); FUNCTIONS IN: ATPase activity, coupled to transmembrane movement of substances; INVOLVED …	GO:0009751|response to salicylic acid stimulus GO:0042626|ATPase activity coupled to transmembrane movement of substances GO:0009753|response to jasmonic acid stimulus GO:0009723|response to ethylene stimulus GO:0005886|plasma membrane GO:0009607|response to biotic stimulus GO:0006855|multidrug transport GO:0015692|lead ion transport
AT1G15670	134	47	158	390	211	681	96	40	50	231	211	248	0.000492961	0.0376836	protein_coding kelch repeat-containing F-box family protein kelch repeat-containing F-box family protein; FUNCTIONS IN: molecular_function unknown; INVOLVED IN: biological_process unknown; LOCATED IN: cellular_component unknown; EXPRESSED IN: 21 plant structures; EXPRESSED DURING: 13 growth stages; CONTAINS InterPro DOMAIN/s: Cyclin-like F-box (InterPro:IPR001810), Galactose oxidase/kelch, beta-p…	GO:0003674|molecular_function GO:0005575|cellular_component GO:0008150|biological_process
AT1G17380	70	52	128	486	357	569	48	37	44	286	357	222	5.9871e-07	0.00017901	protein_coding JAZ5 (JASMONATE-ZIM-DOMAIN PROTEIN 5) JASMONATE-ZIM-DOMAIN PROTEIN 5 (JAZ5); FUNCTIONS IN: molecular_function unknown; INVOLVED IN: response to jasmonic acid stimulus; LOCATED IN: cellular_component unknown; EXPRESSED IN: 20 plant structures; EXPRESSED DURING: 12 growth stages; CONTAINS InterPro DOMAIN/s: Tify (InterPro:IPR010399), CCT domain-like (InterPro:IPR018467); BEST Arabido…	GO:0003674|molecular_function GO:0005575|cellular_component GO:0009753|response to jasmonic acid stimulus
AT1G17860	37	61	62	236	177	324	27	44	28	142	177	126	0.000299618	0.0260759	protein_coding trypsin and protease inhibitor family protein / Kunitz family protein trypsin and protease inhibitor family protein / Kunitz family protein; FUNCTIONS IN: endopeptidase inhibitor activity; INVOLVED IN: biological_process unknown; LOCATED IN: apoplast, cell wall; EXPRESSED IN: 17 plant structures; EXPRESSED DURING: 13 growth stages; CONTAINS InterPro DOMAIN/s: Proteinase inhibitor I…	GO:0012505|endomembrane system GO:0004866|endopeptidase inhibitor activity GO:0008150|biological_process
AT1G18300	91	43	22	282	257	211	68	31	11	177	257	82	0.000139769	0.014597	protein_coding atnudt4 (Arabidopsis thaliana Nudix hydrolase homolog 4); hydrolase Arabidopsis thaliana Nudix hydrolase homolog 4 (atnudt4); FUNCTIONS IN: hydrolase activity; LOCATED IN: cytosol; EXPRESSED IN: stem, root, leaf; CONTAINS InterPro DOMAIN/s: NUDIX (InterPro:IPR015797), NUDIX hydrolase, core (InterPro:IPR000086); BEST Arabidopsis thaliana protein match is: atnudt21 (Arabidopsis thali…	GO:0016787|hydrolase activity GO:0005829|cytosol
AT1G18860	7	7	3	71	58	158	3	5	2	45	58	60	2.46621e-06	0.000567919	protein_coding WRKY61; transcription factor member of WRKY Transcription Factor; Group II-b WRKY61; FUNCTIONS IN: transcription factor activity; INVOLVED IN: regulation of transcription, DNA-dependent; LOCATED IN: nucleus; EXPRESSED IN: stem, root; CONTAINS InterPro DOMAIN/s: DNA-binding WRKY (InterPro:IPR003657); BEST Arabidopsis thaliana protein match is: WRKY72; transcription factor (TAIR:AT5G…	GO:0005634|nucleus GO:0006355|regulation of transcription DNA-dependent GO:0003700|transcription factor activity
AT1G19020	197	174	196	657	570	1641	133	124	73	399	570	614	2.29694e-06	0.000532244	protein_coding unknown protein unknown protein; FUNCTIONS IN: molecular_function unknown; INVOLVED IN: response to oxidative stress; LOCATED IN: cellular_component unknown; EXPRESSED IN: 19 plant structures; EXPRESSED DURING: 9 growth stages; BEST Arabidopsis thaliana protein match is: unknown protein (TAIR:AT3G48180.1); Has 58 Blast hits to 58 proteins in 9 species: Archae - 0; Bacteria - 0; Met…	GO:0006979|response to oxidative stress GO:0003674|molecular_function GO:0005575|cellular_component GO:0008150|biological_process
AT1G19180	630	561	1626	2588	2573	5322	449	390	612	1488	2573	1855	7.20925e-08	2.7842e-05	protein_coding JAZ1 (JASMONATE-ZIM-DOMAIN PROTEIN 1); protein binding JAZ1 is a nuclear-localized protein involved in jasmonate signaling. JAZ1 transcript levels rise in response to a jasmonate stimulus. JAZ1 can interact with the COI1 F-box subunit of an SCF E3 ubiquitin ligase in a yeast-two-hybrid assay only in the presence of jasmonate-isoleucine (JA-ILE) or coronatine. Application of jasmona…	GO:0009908|flower development GO:0005634|nucleus GO:0009555|pollen development GO:0009867|jasmonic acid mediated signaling pathway GO:0005515|protein binding GO:0042742|defense response to bacterium GO:0009753|response to jasmonic acid stimulus
AT1G19640	91	96	120	520	258	458	74	61	45	283	258	167	0.000274985	0.0247453	protein_coding JMT (JASMONIC ACID CARBOXYL METHYLTRANSFERASE); jasmonate O-methyltransferase Encodes a S-adenosyl-L-methionine:jasmonic acid carboxyl methyltransferase that catalyzes the formation of methyljasmonate from jasmonic acid. Its expression is induced in response to wounding or methyljasmonate treatment. JASMONIC ACID CARBOXYL METHYLTRANSFERASE (JMT); FUNCTIONS IN: jasmonate O-methyltra…	GO:0009611|response to wounding GO:0009867|jasmonic acid mediated signaling pathway GO:0009695|jasmonic acid biosynthetic process GO:0005737|cytoplasm GO:0030795|jasmonate O-methyltransferase activity GO:0009694|jasmonic acid metabolic process
AT1G20010	631	712	1079	258	144	355	434	502	420	144	144	131	0.000362768	0.0300215	protein_coding TUB5; structural constituent of cytoskeleton beta tubulin TUB5; FUNCTIONS IN: structural constituent of cytoskeleton; INVOLVED IN: microtubule-based process; LOCATED IN: tubulin complex, cell wall, plasma membrane, chloroplast, membrane; EXPRESSED IN: 24 plant structures; EXPRESSED DURING: 13 growth stages; CONTAINS InterPro DOMAIN/s: Beta tubulin (InterPro:IPR002453), Tubulin (Int…	GO:0045298|tubulin complex GO:0007017|microtubule-based process GO:0005200|structural constituent of cytoskeleton
AT1G20510	279	207	1072	1523	1209	3166	197	153	413	874	1209	1180	5.34435e-07	0.000161091	protein_coding OPCL1 (OPC-8:0 COA LIGASE1); 4-coumarate-CoA ligase OPC-8:0 COA LIGASE1 (OPCL1); FUNCTIONS IN: 4-coumarate-CoA ligase activity; INVOLVED IN: phenylpropanoid metabolic process, jasmonic acid biosynthetic process, response to wounding; LOCATED IN: peroxisome; EXPRESSED IN: 22 plant structures; EXPRESSED DURING: 13 growth stages; CONTAINS InterPro DOMAIN/s: AMP-dependent synthetase an…	GO:0016207|4-coumarate-CoA ligase activity GO:0009695|jasmonic acid biosynthetic process GO:0009698|phenylpropanoid metabolic process GO:0005777|peroxisome
AT1G21120	20	10	30	122	52	367	13	9	10	73	52	133	2.19819e-05	0.00351284	protein_coding O-methyltransferase, putative O-methyltransferase, putative; FUNCTIONS IN: methyltransferase activity, O-methyltransferase activity, protein dimerization activity; LOCATED IN: cytosol; EXPRESSED IN: 9 plant structures; EXPRESSED DURING: LP.04 four leaves visible, LP.10 ten leaves visible, LP.08 eight leaves visible; CONTAINS InterPro DOMAIN/s: Winged helix repressor DNA-binding (In…	GO:0008171|O-methyltransferase activity GO:0005829|cytosol GO:0008168|methyltransferase activity GO:0046983|protein dimerization activity
AT1G21670	322	276	859	845	685	2486	220	200	335	498	685	929	0.00063527	0.0460012	protein_coding INVOLVED IN: proteolysis; LOCATED IN: cell wall, plant-type cell wall; EXPRESSED IN: 23 plant structures; EXPRESSED DURING: 14 growth stages; CONTAINS InterPro DOMAIN/s: WD40-like Beta Propeller (InterPro:IPR011659), Peptidase S9B, dipeptidylpeptidase IV N-terminal (InterPro:IPR002469), Six-bladed beta-propeller, TolB-like (InterPro:IPR011042); BEST Arabidopsis thaliana protein mat…	GO:0012505|endomembrane system
AT1G22900	79	100	262	520	825	1275	59	73	99	296	825	481	1.51006e-08	7.66922e-06	protein_coding FUNCTIONS IN: molecular_function unknown; INVOLVED IN: defense response; LOCATED IN: endomembrane system; EXPRESSED IN: stamen; EXPRESSED DURING: 4 anthesis; CONTAINS InterPro DOMAIN/s: Plant disease resistance response protein (InterPro:IPR004265); BEST Arabidopsis thaliana protein match is: disease resistance-responsive family protein (TAIR:AT5G42500.1); Has 560 Blast hits to 559…	GO:0003674|molecular_function GO:0012505|endomembrane system GO:0006952|defense response
AT1G25220	61	52	177	364	127	659	45	38	71	216	127	232	0.000713776	0.0497429	protein_coding ASB1 (ANTHRANILATE SYNTHASE BETA SUBUNIT 1); anthranilate synthase Catalyzes the first step of tryptophan biosynthesis: Chorismate L-Glutamine = Anthranilate Pyruvate L-Glutamate. Functions as a heterocomplex with anthranilate synthase alpha subunit (ASA1 or ASA2). ANTHRANILATE SYNTHASE BETA SUBUNIT 1 (ASB1); FUNCTIONS IN: anthranilate synthase activity; INVOLVED IN: in 6 processes…	GO:0010386|lateral root primordium development GO:0000162|tryptophan biosynthetic process GO:0009851|auxin biosynthetic process GO:0009723|response to ethylene stimulus GO:0009617|response to bacterium GO:0004049|anthranilate synthase activity GO:0009507|chloroplast
AT1G25390	101	40	260	357	217	932	65	26	97	215	217	318	0.000207737	0.0194245	protein_coding protein kinase family protein protein kinase family protein; FUNCTIONS IN: kinase activity; INVOLVED IN: protein amino acid phosphorylation; LOCATED IN: plasma membrane; EXPRESSED IN: 23 plant structures; EXPRESSED DURING: 13 growth stages; CONTAINS InterPro DOMAIN/s: Protein kinase, ATP binding site (InterPro:IPR017441), Protein kinase, core (InterPro:IPR000719), Serine/threonine …	GO:0012505|endomembrane system GO:0016301|kinase activity GO:0006468|protein amino acid phosphorylation
AT1G26380	10	0	5	56	50	117	7	0	2	37	50	40	1.84319e-05	0.00306441	protein_coding FAD-binding domain-containing protein FAD-binding domain-containing protein; FUNCTIONS IN: electron carrier activity, oxidoreductase activity, FAD binding, catalytic activity; LOCATED IN: endomembrane system; EXPRESSED IN: 9 plant structures; EXPRESSED DURING: LP.06 six leaves visible, 4 anthesis, LP.04 four leaves visible, LP.08 eight leaves visible; CONTAINS InterPro DOMAIN/s: FA…	GO:0009055|electron carrier activity GO:0012505|endomembrane system
AT1G26410	1	1	0	29	15	31	0	0	0	14	15	15	3.01979e-05	0.00453274	protein_coding FAD-binding domain-containing protein FAD-binding domain-containing protein; FUNCTIONS IN: electron carrier activity, oxidoreductase activity, FAD binding, catalytic activity; LOCATED IN: cellular_component unknown; CONTAINS InterPro DOMAIN/s: FAD-binding, type 2 (InterPro:IPR016166), Berberine/berberine-like (InterPro:IPR012951), FAD linked oxidase, N-terminal (InterPro:IPR006094)…	GO:0009055|electron carrier activity GO:0005575|cellular_component
AT1G26420	27	8	6	175	83	157	18	8	2	98	83	64	1.53801e-05	0.00261568	protein_coding FAD-binding domain-containing protein FAD-binding domain-containing protein; FUNCTIONS IN: electron carrier activity, oxidoreductase activity, FAD binding, catalytic activity; LOCATED IN: endomembrane system; EXPRESSED IN: stem, stamen; EXPRESSED DURING: 4 anthesis; CONTAINS InterPro DOMAIN/s: FAD-binding, type 2 (InterPro:IPR016166), Berberine/berberine-like (InterPro:IPR012951), …	GO:0009055|electron carrier activity GO:0012505|endomembrane system
AT1G27730	251	85	154	580	518	1073	183	71	59	339	518	376	5.7437e-05	0.00749815	protein_coding STZ (salt tolerance zinc finger); nucleic acid binding / transcription factor/ transcription repressor/ zinc ion binding Related to Cys2/His2-type zinc-finger proteins found in higher plants. Compensated for a subset of calcineurin deficiency in yeast. Salt tolerance produced by ZAT10 appeared to be partially dependent on ENA1/PMR2, a P-type ATPase required for Li+ and Na+ efflux i…	GO:0009414|response to water deprivation GO:0010200|response to chitin GO:0009651|response to salt stress GO:0008270|zinc ion binding GO:0010117|photoprotection GO:0003700|transcription factor activity GO:0009644|response to high light intensity GO:0009611|response to wounding GO:0005634|nucleus GO:0009409|response to cold GO:0003676|nucleic acid binding GO:0009737|response to abscisic acid stimu…
AT1G29660	222	250	324	60	36	51	173	172	118	37	36	14	6.69143e-05	0.00846705	protein_coding GDSL-motif lipase/hydrolase family protein GDSL-motif lipase/hydrolase family protein; FUNCTIONS IN: hydrolase activity, acting on ester bonds, carboxylesterase activity; INVOLVED IN: lipid metabolic process; LOCATED IN: apoplast, nucleus; EXPRESSED IN: 19 plant structures; EXPRESSED DURING: 10 growth stages; CONTAINS InterPro DOMAIN/s: Lipase, GDSL (InterPro:IPR001087); BEST Arabi…	GO:0012505|endomembrane system GO:0004091|carboxylesterase activity GO:0006629|lipid metabolic process
AT1G29910	4008	3711	9611	2555	838	3585	2782	2613	3582	1463	838	1298	9.05174e-05	0.0106538	protein_coding CAB3 (CHLOROPHYLL A/B BINDING PROTEIN 3); chlorophyll binding member of Chlorophyll a/b-binding protein family CHLOROPHYLL A/B BINDING PROTEIN 3 (CAB3); FUNCTIONS IN: chlorophyll binding; INVOLVED IN: photosynthesis, light harvesting, photosynthesis; LOCATED IN: in 6 components; EXPRESSED IN: cotyledon, guard cell, juvenile leaf, cultured cell, leaf; CONTAINS InterPro DOMAIN/s: Chl…	GO:0010287|plastoglobule GO:0009535|chloroplast thylakoid membrane GO:0030076|light-harvesting complex GO:0016168|chlorophyll binding GO:0015979|photosynthesis
AT1G29930	18005	13283	93016	13089	4624	49717	12582	9362	36141	7714	4624	17889	9.85542e-05	0.0112775	protein_coding CAB1 (CHLOROPHYLL A/B BINDING PROTEIN 1); chlorophyll binding Subunit of light-harvesting complex II (LHCII),which absorbs light and transfers energy to the photosynthetic reaction center. CHLOROPHYLL A/B BINDING PROTEIN 1 (CAB1); FUNCTIONS IN: chlorophyll binding; INVOLVED IN: photosynthesis; LOCATED IN: light-harvesting complex, thylakoid, chloroplast thylakoid membrane, chloropl…	GO:0009535|chloroplast thylakoid membrane GO:0030076|light-harvesting complex GO:0016168|chlorophyll binding GO:0015979|photosynthesis
AT1G30135	12	14	14	166	111	144	5	10	4	85	111	54	8.40353e-07	0.000233123	protein_coding JAZ8 (JASMONATE-ZIM-DOMAIN PROTEIN 8) JASMONATE-ZIM-DOMAIN PROTEIN 8 (JAZ8); FUNCTIONS IN: molecular_function unknown; INVOLVED IN: biological_process unknown; LOCATED IN: cellular_component unknown; EXPRESSED IN: 19 plant structures; EXPRESSED DURING: 8 growth stages; CONTAINS InterPro DOMAIN/s: Tify (InterPro:IPR010399), CCT domain-like (InterPro:IPR018467); BEST Arabidopsis thal…	GO:0003674|molecular_function GO:0005575|cellular_component GO:0008150|biological_process
AT1G30700	73	61	27	817	818	843	48	48	9	471	818	285	1.88189e-13	2.3257e-10	protein_coding FAD-binding domain-containing protein FAD-binding domain-containing protein; FUNCTIONS IN: electron carrier activity, oxidoreductase activity, FAD binding, catalytic activity; LOCATED IN: endomembrane system; EXPRESSED IN: stem, hypocotyl, root, stamen; EXPRESSED DURING: 4 anthesis; CONTAINS InterPro DOMAIN/s: FAD-binding, type 2 (InterPro:IPR016166), Berberine/berberine-like (Inte…	GO:0009055|electron carrier activity GO:0012505|endomembrane system
AT1G30720	79	56	70	763	643	2061	51	38	29	438	643	730	3.03582e-14	4.68971e-11	protein_coding FAD-binding domain-containing protein FAD-binding domain-containing protein; FUNCTIONS IN: electron carrier activity, oxidoreductase activity, FAD binding, catalytic activity; LOCATED IN: endomembrane system; CONTAINS InterPro DOMAIN/s: FAD-binding, type 2 (InterPro:IPR016166), Berberine/berberine-like (InterPro:IPR012951), FAD linked oxidase, N-terminal (InterPro:IPR006094); BEST …	GO:0009055|electron carrier activity GO:0012505|endomembrane system
AT1G30730	36	14	30	287	274	585	28	8	14	162	274	237	1.1958e-09	7.38907e-07	protein_coding FAD-binding domain-containing protein FAD-binding domain-containing protein; FUNCTIONS IN: electron carrier activity, oxidoreductase activity, FAD binding, catalytic activity; LOCATED IN: endomembrane system; CONTAINS InterPro DOMAIN/s: FAD-binding, type 2 (InterPro:IPR016166), Berberine/berberine-like (InterPro:IPR012951), FAD linked oxidase, N-terminal (InterPro:IPR006094); BEST …	GO:0009055|electron carrier activity GO:0012505|endomembrane system
AT1G30755	94	72	121	361	340	637	63	50	47	186	340	228	4.18628e-05	0.00581298	protein_coding unknown protein unknown protein; INVOLVED IN: biological_process unknown; LOCATED IN: cellular_component unknown; CONTAINS InterPro DOMAIN/s: Protein of unknown function DUF668 (InterPro:IPR007700); BEST Arabidopsis thaliana protein match is: unknown protein (TAIR:AT1G34320.1); Has 262 Blast hits to 228 proteins in 50 species: Archae - 0; Bacteria - 7; Metazoa - 53; Fungi - 15; Pla…	GO:0005575|cellular_component GO:0008150|biological_process
AT1G32350	2	23	16	59	81	70	2	16	4	33	81	33	0.000483418	0.037184	protein_coding AOX1D (alternative oxidase 1D); alternative oxidase alternative oxidase 1D (AOX1D); FUNCTIONS IN: alternative oxidase activity; INVOLVED IN: oxidation reduction, response to cyclopentenone; LOCATED IN: mitochondrial envelope, mitochondrion; EXPRESSED IN: stem, sepal, stamen, leaf; EXPRESSED DURING: 4 anthesis, LP.04 four leaves visible, petal differentiation and expansion stage; CO…	GO:0005740|mitochondrial envelope GO:0005739|mitochondrion GO:0006118|electron transport GO:0009916|alternative oxidase activity
AT1G36622	23	20	54	169	326	496	18	17	25	108	326	168	5.47508e-08	2.25543e-05	protein_coding unknown protein unknown protein; LOCATED IN: endomembrane system; BEST Arabidopsis thaliana protein match is: unknown protein (TAIR:AT1G36640.1); Has 4 Blast hits to 4 proteins in 1 species: Archae - 0; Bacteria - 0; Metazoa - 0; Fungi - 0; Plants - 4; Viruses - 0; Other Eukaryotes - 0 (source: NCBI BLink).	GO:0012505|endomembrane system
AT1G43160	511	320	1165	1427	1067	3500	361	232	448	844	1067	1272	7.77059e-05	0.0095203	protein_coding RAP2.6 (related to AP2 6); DNA binding / transcription factor encodes a member of the ERF (ethylene response factor) subfamily B-4 of ERF/AP2 transcription factor family (RAP2.6). The protein contains one AP2 domain. There are 7 members in this subfamily. related to AP2 6 (RAP2.6); FUNCTIONS IN: transcription factor activity, DNA binding; INVOLVED IN: response to wounding, regulati…	GO:0003677|DNA binding GO:0005634|nucleus GO:0006355|regulation of transcription DNA-dependent GO:0003700|transcription factor activity
AT1G49000	40	37	36	260	114	530	23	26	15	175	114	195	2.58308e-06	0.000587532	protein_coding unknown protein unknown protein; FUNCTIONS IN: molecular_function unknown; INVOLVED IN: biological_process unknown; LOCATED IN: chloroplast; EXPRESSED IN: stem; BEST Arabidopsis thaliana protein match is: unknown protein (TAIR:AT3G18560.1); Has 50 Blast hits to 50 proteins in 7 species: Archae - 0; Bacteria - 0; Metazoa - 0; Fungi - 0; Plants - 50; Viruses - 0; Other Eukaryotes - 0…	GO:0003674|molecular_function GO:0008150|biological_process GO:0009507|chloroplast
AT1G49750	4086	5817	16848	2917	1536	7940	2805	4119	6565	1703	1536	2811	0.000207545	0.0194245	protein_coding leucine-rich repeat family protein leucine-rich repeat family protein; FUNCTIONS IN: protein binding; LOCATED IN: chloroplast; EXPRESSED IN: 22 plant structures; EXPRESSED DURING: 13 growth stages; CONTAINS InterPro DOMAIN/s: Leucine-rich repeat (InterPro:IPR001611); BEST Arabidopsis thaliana protein match is: leucine-rich repeat family protein (TAIR:AT3G19320.1); Has 161059 Blast …	GO:0005515|protein binding
AT1G51080	131	207	114	34	25	21	94	142	49	21	25	9	0.000348101	0.0291329	protein_coding unknown protein unknown protein; FUNCTIONS IN: molecular_function unknown; INVOLVED IN: biological_process unknown; LOCATED IN: chloroplast; EXPRESSED IN: 15 plant structures; EXPRESSED DURING: 11 growth stages; Has 93 Blast hits to 90 proteins in 38 species: Archae - 0; Bacteria - 0; Metazoa - 46; Fungi - 8; Plants - 14; Viruses - 0; Other Eukaryotes - 25 (source: NCBI BLink).	GO:0003674|molecular_function GO:0008150|biological_process GO:0009507|chloroplast
AT1G51680	350	286	1013	1088	644	3671	270	194	407	609	644	1343	0.000186186	0.0180703	protein_coding 4CL1 (4-COUMARATE:COA LIGASE 1); 4-coumarate-CoA ligase encodes an isoform of 4-coumarate:CoA ligase (4CL), which is involved in the last step of the general phenylpropanoid pathway. In addition to 4-coumarate, it also converts ferulate. The catalytic efficiency was in the following (descending) order: p-coumaric acid, ferulic acid, caffeic acid and 5-OH-ferulic acid. At4CL1 was un…	GO:0009611|response to wounding GO:0005575|cellular_component GO:0016207|4-coumarate-CoA ligase activity GO:0009620|response to fungus GO:0009411|response to UV GO:0009698|phenylpropanoid metabolic process
AT1G51790	76	31	116	451	199	960	55	22	38	265	199	317	8.42575e-07	0.000233123	protein_coding kinase kinase; FUNCTIONS IN: kinase activity; INVOLVED IN: protein amino acid phosphorylation; LOCATED IN: endomembrane system; EXPRESSED IN: 9 plant structures; EXPRESSED DURING: 6 growth stages; CONTAINS InterPro DOMAIN/s: Protein kinase, core (InterPro:IPR000719), Serine/threonine protein kinase (InterPro:IPR002290), Leucine-rich repeat (InterPro:IPR001611), Tyrosine protein kin…	GO:0012505|endomembrane system GO:0016301|kinase activity GO:0006468|protein amino acid phosphorylation
AT1G51800	102	51	156	1367	809	2727	73	39	57	806	809	1003	4.01751e-16	8.27496e-13	protein_coding leucine-rich repeat protein kinase, putative leucine-rich repeat protein kinase, putative; FUNCTIONS IN: kinase activity; INVOLVED IN: protein amino acid phosphorylation; LOCATED IN: endomembrane system; EXPRESSED IN: 11 plant structures; EXPRESSED DURING: 6 growth stages; CONTAINS InterPro DOMAIN/s: Protein kinase, ATP binding site (InterPro:IPR017441), Protein kinase, core (Inter…	GO:0012505|endomembrane system GO:0016301|kinase activity GO:0006468|protein amino acid phosphorylation
AT1G51820	36	33	45	451	360	1136	28	22	21	248	360	424	1.53907e-11	1.39173e-08	protein_coding leucine-rich repeat protein kinase, putative leucine-rich repeat protein kinase, putative; FUNCTIONS IN: kinase activity; INVOLVED IN: protein amino acid phosphorylation; LOCATED IN: endomembrane system; EXPRESSED IN: 10 plant structures; EXPRESSED DURING: 7 growth stages; CONTAINS InterPro DOMAIN/s: Protein kinase, ATP binding site (InterPro:IPR017441), Serine/threonine protein ki…	GO:0012505|endomembrane system GO:0016301|kinase activity GO:0006468|protein amino acid phosphorylation
AT1G51850	7	6	12	316	129	517	4	3	2	182	129	182	5.8402e-14	7.73305e-11	protein_coding leucine-rich repeat protein kinase, putative leucine-rich repeat protein kinase, putative; FUNCTIONS IN: kinase activity; INVOLVED IN: protein amino acid phosphorylation; LOCATED IN: plasma membrane; EXPRESSED IN: root; CONTAINS InterPro DOMAIN/s: Protein kinase, ATP binding site (InterPro:IPR017441), Serine/threonine protein kinase (InterPro:IPR002290), Leucine-rich repeat (InterP…	GO:0012505|endomembrane system GO:0016301|kinase activity GO:0006468|protein amino acid phosphorylation
AT1G51860	0	9	3	61	22	122	0	5	1	37	22	44	2.18293e-05	0.00351284	protein_coding leucine-rich repeat protein kinase, putative leucine-rich repeat protein kinase, putative; FUNCTIONS IN: kinase activity; INVOLVED IN: protein amino acid phosphorylation; LOCATED IN: endomembrane system; EXPRESSED IN: stem, root, stamen; EXPRESSED DURING: 4 anthesis; CONTAINS InterPro DOMAIN/s: Protein kinase, ATP binding site (InterPro:IPR017441), Serine/threonine protein kinase (…	GO:0012505|endomembrane system GO:0016301|kinase activity GO:0006468|protein amino acid phosphorylation
AT1G51890	37	37	62	469	217	651	23	29	23	249	217	252	3.15065e-08	1.35142e-05	protein_coding leucine-rich repeat protein kinase, putative leucine-rich repeat protein kinase, putative; FUNCTIONS IN: kinase activity; INVOLVED IN: protein amino acid phosphorylation; LOCATED IN: endomembrane system; EXPRESSED IN: 9 plant structures; EXPRESSED DURING: 8 growth stages; CONTAINS InterPro DOMAIN/s: Protein kinase, ATP binding site (InterPro:IPR017441), Protein kinase, core (InterP…	GO:0012505|endomembrane system GO:0016301|kinase activity GO:0006468|protein amino acid phosphorylation
AT1G52200	294	156	219	1311	799	1874	209	118	82	761	799	696	6.35962e-08	2.48193e-05	protein_coding unknown protein unknown protein; FUNCTIONS IN: molecular_function unknown; INVOLVED IN: response to oxidative stress; LOCATED IN: plasma membrane; EXPRESSED IN: 10 plant structures; EXPRESSED DURING: 6 growth stages; CONTAINS InterPro DOMAIN/s: Protein of unknown function Cys-rich (InterPro:IPR006461); BEST Arabidopsis thaliana protein match is: unknown protein (TAIR:AT3G18470.1); …	GO:0006979|response to oxidative stress GO:0003674|molecular_function GO:0008150|biological_process GO:0009507|chloroplast
AT1G53310	275	246	495	1008	562	1541	196	184	203	592	562	548	0.000637797	0.0460045	protein_coding ATPPC1 (PHOSPHOENOLPYRUVATE CARBOXYLASE 1); catalytic/ phosphoenolpyruvate carboxylase Encodes one of four Arabidopsis phosphoenolpyruvate carboxylase proteins. PHOSPHOENOLPYRUVATE CARBOXYLASE 1 (ATPPC1); FUNCTIONS IN: phosphoenolpyruvate carboxylase activity, catalytic activity; INVOLVED IN: response to salt stress, response to water deprivation, tricarboxylic acid cycle; LOCATED …	GO:0006099|tricarboxylic acid cycle GO:0005575|cellular_component GO:0009414|response to water deprivation GO:0008964|phosphoenolpyruvate carboxylase activity
AT1G53625	279	158	187	1306	1183	1535	186	118	80	746	1183	546	3.28533e-09	1.99678e-06	protein_coding unknown protein unknown protein; FUNCTIONS IN: molecular_function unknown; INVOLVED IN: biological_process unknown; LOCATED IN: cellular_component unknown; Has 29192 Blast hits to 6803 proteins in 621 species: Archae - 23; Bacteria - 6296; Metazoa - 10109; Fungi - 1190; Plants - 7711; Viruses - 570; Other Eukaryotes - 3293 (source: NCBI BLink).	GO:0003674|molecular_function GO:0005575|cellular_component GO:0008150|biological_process
AT1G55450	285	155	374	790	610	1458	215	99	148	429	610	504	0.000187835	0.0181354	protein_coding embryo-abundant protein-related embryo-abundant protein-related; FUNCTIONS IN: methyltransferase activity; INVOLVED IN: response to salt stress; EXPRESSED IN: 20 plant structures; EXPRESSED DURING: 13 growth stages; CONTAINS InterPro DOMAIN/s: Methyltransferase type 11 (InterPro:IPR013216); BEST Arabidopsis thaliana protein match is: embryo-abundant protein-related (TAIR:AT3G54150.…	GO:0008152|metabolic process GO:0008168|methyltransferase activity
AT1G55670	543	983	120	302	136	130	370	692	55	163	136	36	0.000424674	0.033788	protein_coding PSAG (PHOTOSYSTEM I SUBUNIT G) Encodes subunit G of photosystem I, an 11-kDa membrane protein that plays an important role in electron transport between plastocyanin and PSI and is involved in the stability of the PSI complex. PSI-G subunit is bound to PSI-B and is in contact with Lhca1. The protein inserts into thylakoids by a direct or "spontaneous" pathway that does not involve …	GO:0003674|molecular_function GO:0016020|membrane GO:0009773|photosynthetic electron transport in photosystem I GO:0009535|chloroplast thylakoid membrane GO:0009780|photosynthetic NADP+ reduction GO:0042550|photosystem I stabilization GO:0030093|chloroplast photosystem I GO:0050821|protein stabilization GO:0015979|photosynthesis GO:0009522|photosystem I
AT1G56140	51	41	69	252	177	467	36	30	20	142	177	180	2.46326e-05	0.00386971	protein_coding leucine-rich repeat family protein / protein kinase family protein leucine-rich repeat family protein / protein kinase family protein; FUNCTIONS IN: protein binding, protein serine/threonine kinase activity, protein tyrosine kinase activity, protein kinase activity, ATP binding; INVOLVED IN: protein amino acid phosphorylation; LOCATED IN: plasma membrane; EXPRESSED IN: callus; CONT…	GO:0005515|protein binding GO:0004672|protein kinase activity GO:0006468|protein amino acid phosphorylation GO:0005886|plasma membrane
AT1G56660	93	48	101	267	368	153	69	32	36	148	368	56	0.000283644	0.0252791	protein_coding unknown protein unknown protein; FUNCTIONS IN: molecular_function unknown; INVOLVED IN: biological_process unknown; LOCATED IN: cellular_component unknown; EXPRESSED IN: 16 plant structures; EXPRESSED DURING: 8 growth stages; Has 553849 Blast hits to 156892 proteins in 3110 species: Archae - 2183; Bacteria - 59979; Metazoa - 236712; Fungi - 59029; Plants - 23920; Viruses - 2741; Ot…	GO:0003674|molecular_function GO:0005575|cellular_component GO:0008150|biological_process
AT1G59870	2834	1826	5566	8364	4039	12408	2001	1282	2145	4877	4039	4492	3.41278e-05	0.00504099	protein_coding PEN3 (PENETRATION 3); ATPase, coupled to transmembrane movement of substances / cadmium ion transmembrane transporter ATP binding cassette transporter. Localized to the plasma membrane in uninfected cells. In infected leaves, the protein concentrated at infection sites. Contributes to nonhost resistance to inappropriate pathogens that enter by direct penetration in a salicylic acid…	GO:0009817|defense response to fungus incompatible interaction GO:0042626|ATPase activity coupled to transmembrane movement of substances GO:0009627|systemic acquired resistance GO:0015086|cadmium ion transmembrane transporter activity GO:0015691|cadmium ion transport GO:0005886|plasma membrane GO:0006855|multidrug transport GO:0031348|negative regulation of defense response
AT1G60950	4740	6929	20142	2538	1884	9217	3338	4889	7704	1466	1884	3342	4.08137e-05	0.0057317	protein_coding FED A; 2 iron, 2 sulfur cluster binding / electron carrier/ iron-sulfur cluster binding encodes a major leaf ferredoxin FED A; FUNCTIONS IN: electron carrier activity, iron-sulfur cluster binding, 2 iron, 2 sulfur cluster binding; INVOLVED IN: photosynthetic electron transport chain, response to light stimulus; LOCATED IN: chloroplast stroma, chloroplast; EXPRESSED IN: 22 plant str…	GO:0009055|electron carrier activity GO:0051537|2 iron 2 sulfur cluster binding GO:0009767|photosynthetic electron transport chain GO:0009416|response to light stimulus GO:0051536|iron-sulfur cluster binding GO:0009570|chloroplast stroma
AT1G61120	67	62	229	542	162	1149	45	47	91	328	162	428	1.12089e-05	0.00201493	protein_coding TPS04 (TERPENE SYNTHASE 04); (E,E)-geranyllinalool synthase Encodes a geranyllinalool synthase that produces a precursor to TMTT, a volatile plant defense C16-homoterpene. GES transcript levels rise in response to alamethicin, a fungal peptide mixture that damages membranes. This transcriptional response is blocked in JA biosynthetic and JA signaling mutants, but GES transcript lev…	GO:0005575|cellular_component GO:0000304|response to singlet oxygen GO:0009753|response to jasmonic acid stimulus GO:0002213|defense response to insect
AT1G61360	49	33	67	307	95	406	32	20	19	194	95	139	3.06462e-05	0.00458148	protein_coding S-locus lectin protein kinase family protein S-locus lectin protein kinase family protein; FUNCTIONS IN: in 6 functions; INVOLVED IN: protein amino acid phosphorylation, recognition of pollen; LOCATED IN: endomembrane system; EXPRESSED IN: 21 plant structures; EXPRESSED DURING: 13 growth stages; CONTAINS InterPro DOMAIN/s: Curculin-like (mannose-binding) lectin (InterPro:IPR001480)…	GO:0012505|endomembrane system GO:0030246|carbohydrate binding GO:0016301|kinase activity GO:0048544|recognition or rejection of self pollen GO:0006468|protein amino acid phosphorylation
AT1G61560	11	35	28	176	101	250	9	28	9	99	101	95	6.88981e-05	0.00865897	protein_coding MLO6 (MILDEW RESISTANCE LOCUS O 6); calmodulin binding A member of a large family of seven-transmembrane domain proteins specific to plants, homologs of the barley mildew resistance locus o (MLO) protein. The Arabidopsis genome contains 15 genes encoding MLO proteins, with localization in plasma membrane. Phylogenetic analysis revealed four clades of closely-related AtMLO genes. AT…	GO:0009817|defense response to fungus incompatible interaction GO:0006952|defense response GO:0008219|cell death GO:0005516|calmodulin binding GO:0005886|plasma membrane
AT1G62300	279	230	490	694	731	3172	198	162	189	396	731	1175	3.07678e-06	0.00067498	protein_coding WRKY6; transcription factor transcription factor WRKY6 (WRKY6) WRKY6; FUNCTIONS IN: transcription factor activity; INVOLVED IN: response to chitin, regulation of transcription, DNA-dependent; LOCATED IN: nucleus; EXPRESSED IN: 14 plant structures; EXPRESSED DURING: 6 growth stages; CONTAINS InterPro DOMAIN/s: DNA-binding WRKY (InterPro:IPR003657); BEST Arabidopsis thaliana protein …	GO:0005634|nucleus GO:0010200|response to chitin GO:0006355|regulation of transcription DNA-dependent GO:0003700|transcription factor activity
AT1G64170	17	21	73	338	163	914	13	10	25	198	163	332	4.47533e-10	3.07265e-07	protein_coding ATCHX16 (CATION/H+ EXCHANGER 16); monovalent cation:proton antiporter/ sodium:hydrogen antiporter member of Putative Na+/H+ antiporter family CATION/H+ EXCHANGER 16 (ATCHX16); FUNCTIONS IN: monovalent cation:proton antiporter activity, sodium:hydrogen antiporter activity; INVOLVED IN: cation transport; LOCATED IN: integral to membrane; EXPRESSED IN: stem, hypocotyl, male gametophyt…	GO:0005451|monovalent cation:proton antiporter activity GO:0015385|sodium:hydrogen antiporter activity GO:0016021|integral to membrane GO:0006812|cation transport
AT1G64400	52	72	102	349	270	529	37	49	47	195	270	214	2.72962e-05	0.00421669	protein_coding long-chain-fatty-acid--CoA ligase, putative / long-chain acyl-CoA synthetase, putative long-chain-fatty-acid--CoA ligase, putative / long-chain acyl-CoA synthetase, putative; FUNCTIONS IN: catalytic activity; INVOLVED IN: fatty acid biosynthetic process; EXPRESSED IN: 22 plant structures; EXPRESSED DURING: 13 growth stages; CONTAINS InterPro DOMAIN/s: AMP-dependent synthetase and l…	GO:0006633|fatty acid biosynthetic process GO:0003824|catalytic activity
AT1G64720	8759	8729	4600	4227	1452	2701	6051	6171	1815	2412	1452	934	1.02014e-06	0.000274069	protein_coding CP5 membrane related protein CP5 CP5; FUNCTIONS IN: molecular_function unknown; INVOLVED IN: biological_process unknown; LOCATED IN: vacuole; EXPRESSED IN: 23 plant structures; EXPRESSED DURING: 15 growth stages; CONTAINS InterPro DOMAIN/s: Lipid-binding START (InterPro:IPR002913); BEST Arabidopsis thaliana protein match is: unknown protein (TAIR:AT5G54170.1); Has 244 Blast hits to…	GO:0003674|molecular_function GO:0012505|endomembrane system GO:0008150|biological_process
AT1G65390	19	39	24	289	200	284	16	28	10	153	200	107	1.11399e-06	0.000295009	protein_coding ATPP2-A5 (ARABIDOPSIS THALIANA PHLOEM PROTEIN 2 A5); carbohydrate binding ARABIDOPSIS THALIANA PHLOEM PROTEIN 2 A5 (ATPP2-A5); FUNCTIONS IN: carbohydrate binding; INVOLVED IN: signal transduction, defense response, innate immune response; LOCATED IN: intrinsic to membrane, chloroplast; EXPRESSED IN: 21 plant structures; EXPRESSED DURING: 12 growth stages; CONTAINS InterPro DOMAIN/s…	GO:0031224|intrinsic to membrane GO:0030246|carbohydrate binding GO:0006952|defense response GO:0009507|chloroplast
AT1G65486	24	3	20	99	75	175	17	2	9	64	75	59	0.00013698	0.014392	protein_coding unknown protein unknown protein; FUNCTIONS IN: molecular_function unknown; INVOLVED IN: biological_process unknown; LOCATED IN: endomembrane system; BEST Arabidopsis thaliana protein match is: unknown protein (TAIR:AT1G65500.1); Has 8 Blast hits to 8 proteins in 1 species: Archae - 0; Bacteria - 0; Metazoa - 0; Fungi - 0; Plants - 8; Viruses - 0; Other Eukaryotes - 0 (source: NCBI …	GO:0012505|endomembrane system
AT1G65500	63	49	54	376	183	1072	45	35	18	226	183	389	1.02877e-07	3.77639e-05	protein_coding unknown protein unknown protein; FUNCTIONS IN: molecular_function unknown; INVOLVED IN: biological_process unknown; LOCATED IN: endomembrane system; EXPRESSED IN: 14 plant structures; EXPRESSED DURING: 9 growth stages; BEST Arabidopsis thaliana protein match is: unknown protein (TAIR:AT1G65486.1); Has 8 Blast hits to 8 proteins in 1 species: Archae - 0; Bacteria - 0; Metazoa - 0; F…	GO:0003674|molecular_function GO:0012505|endomembrane system GO:0008150|biological_process
AT1G65690	26	4	36	205	125	279	15	4	13	112	125	95	1.06925e-06	0.000285198	protein_coding harpin-induced protein-related / HIN1-related / harpin-responsive protein-related harpin-induced protein-related / HIN1-related / harpin-responsive protein-related; FUNCTIONS IN: molecular_function unknown; INVOLVED IN: biological_process unknown; EXPRESSED IN: 15 plant structures; EXPRESSED DURING: 7 growth stages; CONTAINS InterPro DOMAIN/s: Harpin-induced 1 (InterPro:IPR010847);…	GO:0003674|molecular_function GO:0008150|biological_process
AT1G65730	44	89	69	218	297	368	31	62	31	126	297	144	0.000132537	0.0141202	protein_coding YSL7 (YELLOW STRIPE LIKE 7); oligopeptide transporter Arabidopsis thaliana metal-nicotianamine transporter YSL4 YELLOW STRIPE LIKE 7 (YSL7); FUNCTIONS IN: oligopeptide transporter activity; INVOLVED IN: oligopeptide transport; LOCATED IN: plasma membrane; EXPRESSED IN: 10 plant structures; EXPRESSED DURING: 4 anthesis, C globular stage, petal differentiation and expansion stage; CO…	GO:0006857|oligopeptide transport GO:0015198|oligopeptide transporter activity
AT1G65845	432	233	681	2866	5050	9074	300	174	235	1659	5050	3284	1.71806e-23	7.96212e-20	protein_coding unknown protein unknown protein; FUNCTIONS IN: molecular_function unknown; INVOLVED IN: biological_process unknown; LOCATED IN: endomembrane system; Has 5 Blast hits to 5 proteins in 1 species: Archae - 0; Bacteria - 0; Metazoa - 0; Fungi - 0; Plants - 5; Viruses - 0; Other Eukaryotes - 0 (source: NCBI BLink).	GO:0003674|molecular_function GO:0012505|endomembrane system GO:0008150|biological_process
AT1G67090	22257	22969	34374	12690	8927	17665	15545	16182	13284	7479	8927	6445	0.000109956	0.0122054	protein_coding RBCS1A (RIBULOSE BISPHOSPHATE CARBOXYLASE SMALL CHAIN 1A); copper ion binding / ribulose-bisphosphate carboxylase RIBULOSE BISPHOSPHATE CARBOXYLASE SMALL CHAIN 1A (RBCS1A); FUNCTIONS IN: ribulose-bisphosphate carboxylase activity, copper ion binding; INVOLVED IN: response to blue light, response to cold, carbon utilization by fixation of carbon dioxide, response to red light, respo…	GO:0009535|chloroplast thylakoid membrane GO:0015977|carbon utilization by fixation of carbon dioxide GO:0009573|chloroplast ribulose bisphosphate carboxylase complex GO:0009409|response to cold GO:0016984|ribulose-bisphosphate carboxylase activity
AT1G67740	12429	16170	10965	6552	3546	8027	8608	11444	4235	3831	3546	2898	1.26507e-05	0.00219399	protein_coding PSBY PsbY precursor (psbY) mRNA. This single nuclear gene is imported into the chloroplasts where it is processed into two integral membrane proteins with identical topology (PsbY-1 and PsbY-2). The protein appears to bind manganese but its role is not well understood. PSBY; INVOLVED IN: photosynthesis; LOCATED IN: chloroplast stromal thylakoid, chloroplast thylakoid membrane, chlo…	GO:0030095|chloroplast photosystem II GO:0009523|photosystem II GO:0009533|chloroplast stromal thylakoid GO:0015979|photosynthesis
AT1G68150	1	3	1	35	28	35	0	3	0	19	28	18	9.6137e-05	0.0111037	protein_coding WRKY9; transcription factor member of WRKY Transcription Factor; Group II-b WRKY9; FUNCTIONS IN: transcription factor activity; INVOLVED IN: regulation of transcription, DNA-dependent; LOCATED IN: nucleus; EXPRESSED IN: root; CONTAINS InterPro DOMAIN/s: DNA-binding WRKY (InterPro:IPR003657); BEST Arabidopsis thaliana protein match is: WRKY72; transcription factor (TAIR:AT5G15130.1)…	GO:0005634|nucleus GO:0006355|regulation of transcription DNA-dependent GO:0003700|transcription factor activity
AT1G68620	16	10	14	115	76	190	11	9	2	61	76	71	1.83391e-05	0.00306271	protein_coding hydrolase hydrolase; FUNCTIONS IN: hydrolase activity; INVOLVED IN: metabolic process; LOCATED IN: cellular_component unknown; EXPRESSED IN: 11 plant structures; EXPRESSED DURING: LP.06 six leaves visible, 4 anthesis, LP.04 four leaves visible, C globular stage, petal differentiation and expansion stage; CONTAINS InterPro DOMAIN/s: Lipase, GDXG, active site (InterPro:IPR002168), Al…	GO:0005575|cellular_component GO:0008152|metabolic process GO:0016787|hydrolase activity
AT1G69140	2548	3637	2078	774	167	337	1777	2523	821	450	167	115	3.63979e-12	3.74848e-09	pseudogene pseudogene, hypothetical protein	none
AT1G70700	872	659	1503	2976	1441	3503	598	452	575	1752	1441	1351	9.97861e-05	0.0113833	protein_coding TIFY7 JAZ9 is a protein presumed to be involved in jasmonate signaling. JAZ9 transcript levels rise in response to a jasmonate stimulus. JAZ9 can interact with the COI1 F-box subunit of an SCF E3 ubiquitin ligase in a yeast-two-hybrid assay only in the presence of jasmonate-isoleucine (JA-ILE) or coronatine. The Jas domain appears to be important for JAZ9-COI1 interactions in the p…	GO:0003674|molecular_function GO:0005575|cellular_component GO:0009753|response to jasmonic acid stimulus
AT1G71697	125	104	83	423	335	302	78	69	24	254	335	108	0.000207571	0.0194245	protein_coding ATCK1 (CHOLINE KINASE 1); choline kinase Encodes choline kinase. mRNA levels are increased in response to wounding. CHOLINE KINASE 1 (ATCK1); FUNCTIONS IN: choline kinase activity; INVOLVED IN: response to salt stress, response to wounding; LOCATED IN: cellular_component unknown; EXPRESSED IN: 24 plant structures; EXPRESSED DURING: 15 growth stages; CONTAINS InterPro DOMAIN/s: Chol…	GO:0009611|response to wounding GO:0005575|cellular_component GO:0004103|choline kinase activity
AT1G72450	200	184	442	1000	457	1122	138	130	156	578	457	407	0.000183697	0.017912	protein_coding JAZ6 (JASMONATE-ZIM-DOMAIN PROTEIN 6) JAZ6 transcript levels rise in response to a jasmonate stimulus and a GFP:JAZ6 fusion protein localizes to the nucleus. Application of jasmonate methyl ester to Arabidopsis roots reduces the levels of a JAZ6:GUS fusion protein, presumably by stimulating ubiquitin-proteasome-mediated degradation. JASMONATE-ZIM-DOMAIN PROTEIN 6 (JAZ6); FUNCTIONS …	GO:0003674|molecular_function GO:0005634|nucleus GO:0009753|response to jasmonic acid stimulus
AT1G72520	75	228	196	325	579	1023	56	168	57	174	579	373	6.28042e-05	0.00800161	protein_coding lipoxygenase, putative lipoxygenase, putative; FUNCTIONS IN: electron carrier activity, oxidoreductase activity, acting on single donors with incorporation of molecular oxygen, incorporation of two atoms of oxygen, lipoxygenase activity, iron ion binding, metal ion binding; INVOLVED IN: growth, jasmonic acid biosynthetic process, response to wounding, defense response; LOCATED IN: …	GO:0009611|response to wounding GO:0016702|oxidoreductase activity acting on single donors with incorporation of molecular oxygen incorporation of two atoms of oxygen GO:0005506|iron ion binding GO:0046872|metal ion binding GO:0006952|defense response GO:0009695|jasmonic acid biosynthetic process GO:0040007|growth GO:0009507|chloroplast GO:0016165|lipoxygenase activity
AT1G72610	59	62	1039	20	2	249	37	43	395	10	2	81	8.72385e-05	0.0103666	protein_coding GER1 (GERMIN-LIKE PROTEIN 1); oxalate oxidase germin-like protein (GLP1) GERMIN-LIKE PROTEIN 1 (GER1); FUNCTIONS IN: oxalate oxidase activity; INVOLVED IN: biological_process unknown; LOCATED IN: extracellular matrix; EXPRESSED IN: 23 plant structures; EXPRESSED DURING: 13 growth stages; CONTAINS InterPro DOMAIN/s: Cupin, RmlC-type (InterPro:IPR011051), Cupin 1 (InterPro:IPR006045)…	GO:0031012|extracellular matrix GO:0046872|metal ion binding GO:0045735|nutrient reservoir activity GO:0008150|biological_process GO:0030145|manganese ion binding
AT1G74000	21	6	38	61	117	121	15	5	11	39	117	42	0.000256186	0.0231661	protein_coding SS3 (STRICTOSIDINE SYNTHASE 3); strictosidine synthase encodes a protein similar to strictosidine synthase, which is involved in the production of monoterpene indole alkaloids. This gene belongs to a family of 13 members in Arabidopsis. STRICTOSIDINE SYNTHASE 3 (SS3); FUNCTIONS IN: strictosidine synthase activity; INVOLVED IN: biosynthetic process; LOCATED IN: cell wall, plant-type…	GO:0016844|strictosidine synthase activity GO:0009505|plant-type cell wall GO:0009058|biosynthetic process
AT1G75750	1718	1270	2401	816	328	921	1191	883	922	492	328	304	0.000518736	0.0392493	protein_coding GASA1 (GAST1 PROTEIN HOMOLOG 1) GA-responsive GAST1 protein homolog regulated by BR and GA antagonistically. Possibly involved in cell elongation based on expression data GAST1 PROTEIN HOMOLOG 1 (GASA1); FUNCTIONS IN: molecular_function unknown; INVOLVED IN: response to gibberellin stimulus, response to brassinosteroid stimulus, response to abscisic acid stimulus, unidimensional ce…	GO:0003674|molecular_function GO:0009826|unidimensional cell growth GO:0009505|plant-type cell wall GO:0009741|response to brassinosteroid stimulus GO:0009739|response to gibberellin stimulus GO:0009737|response to abscisic acid stimulus
AT1G76070	91	115	187	312	376	998	67	81	81	165	376	361	0.000142064	0.0147484	protein_coding unknown protein unknown protein; FUNCTIONS IN: molecular_function unknown; INVOLVED IN: biological_process unknown; LOCATED IN: plasma membrane; EXPRESSED IN: 8 plant structures; EXPRESSED DURING: 4 anthesis, LP.04 four leaves visible, petal differentiation and expansion stage; BEST Arabidopsis thaliana protein match is: unknown protein (TAIR:AT1G20310.1); Has 36 Blast hits to 36 p…	GO:0003674|molecular_function GO:0008150|biological_process
AT1G76930	15892	19542	27047	78233	78406	183472	11101	13763	10541	45936	78406	66497	3.30428e-29	3.06266e-25	protein_coding ATEXT4 (EXTENSIN 4); structural constituent of cell wall Encodes an Arabidopsis extensin gene that belongs to cell-wall hydroxyproline-rich glycoproteins. The cross-link of extensins enforces cell wall strength. Transgenic plants overexpressing this gene show an increase in stem thickness. EXTENSIN 4 (ATEXT4); FUNCTIONS IN: structural constituent of cell wall; INVOLVED IN: response…	GO:0009751|response to salicylic acid stimulus GO:0009611|response to wounding GO:0005199|structural constituent of cell wall GO:0012505|endomembrane system GO:0009753|response to jasmonic acid stimulus GO:0009737|response to abscisic acid stimulus
AT1G78450	18	41	83	6	3	18	11	31	42	1	3	2	0.000122169	0.013249	protein_coding SOUL heme-binding family protein SOUL heme-binding family protein; FUNCTIONS IN: binding; INVOLVED IN: biological_process unknown; LOCATED IN: endomembrane system; EXPRESSED IN: 13 plant structures; EXPRESSED DURING: 9 growth stages; CONTAINS InterPro DOMAIN/s: SOUL haem-binding protein (InterPro:IPR006917); BEST Arabidopsis thaliana protein match is: SOUL heme-binding family prote…	GO:0012505|endomembrane system GO:0008150|biological_process GO:0005488|binding
AT1G80450	147	139	233	365	511	1064	102	96	86	223	511	380	8.13129e-05	0.00975319	protein_coding VQ motif-containing protein VQ motif-containing protein; FUNCTIONS IN: molecular_function unknown; INVOLVED IN: biological_process unknown; LOCATED IN: chloroplast; EXPRESSED IN: 14 plant structures; EXPRESSED DURING: 7 growth stages; CONTAINS InterPro DOMAIN/s: VQ (InterPro:IPR008889); BEST Arabidopsis thaliana protein match is: VQ motif-containing protein (TAIR:AT5G08480.2); Has …	GO:0003674|molecular_function GO:0008150|biological_process GO:0009507|chloroplast
AT1G80820	17	10	47	52	66	228	13	5	15	28	66	91	0.00067937	0.0484378	protein_coding CCR2 (CINNAMOYL COA REDUCTASE); cinnamoyl-CoA reductase Encodes an cinnamoyl CoA reductase isoform. Involved in lignin biosynthesis. CINNAMOYL COA REDUCTASE (CCR2); FUNCTIONS IN: cinnamoyl-CoA reductase activity; INVOLVED IN: lignin biosynthetic process, response to cold; LOCATED IN: cellular_component unknown; EXPRESSED IN: hypocotyl, flower, root; EXPRESSED DURING: petal differen…	GO:0005575|cellular_component GO:0009809|lignin biosynthetic process GO:0009409|response to cold GO:0016621|cinnamoyl-CoA reductase activity
AT1G80840	87	42	49	184	241	331	62	31	21	118	241	124	0.000388562	0.031592	protein_coding WRKY40; transcription factor Pathogen-induced transcription factor. Binds W-box sequences in vitro. Forms protein complexes with itself and with WRKY40 and WRKY60. Coexpression with WRKY18 or WRKY60 made plants more susceptible to both P. syringae and B. cinerea. WRKY18, WRKY40, and WRKY60 have partially redundant roles in response to the hemibiotrophic bacterial pathogen Pseudomon…	GO:0050832|defense response to fungus GO:0005634|nucleus GO:0006355|regulation of transcription DNA-dependent GO:0042742|defense response to bacterium GO:0009751|response to salicylic acid stimulus GO:0010200|response to chitin GO:0031347|regulation of defense response GO:0050691|regulation of defense response to virus by host GO:0003700|transcription factor activity
AT2G05540	19	42	5	4	0	5	13	27	3	1	0	1	0.000617321	0.044965	protein_coding glycine-rich protein glycine-rich protein; LOCATED IN: endomembrane system; EXPRESSED IN: 19 plant structures; EXPRESSED DURING: 9 growth stages; CONTAINS InterPro DOMAIN/s: Glycine rich (InterPro:IPR010800); Has 20361 Blast hits to 7141 proteins in 685 species: Archae - 4; Bacteria - 2947; Metazoa - 9104; Fungi - 1634; Plants - 4601; Viruses - 106; Other Eukaryotes - 1965 (source:…	GO:0012505|endomembrane system
AT2G06050	281	231	1358	1029	513	3655	188	167	524	610	513	1334	0.000458909	0.0358995	protein_coding OPR3 (OPDA-REDUCTASE 3); 12-oxophytodienoate reductase Encodes a 12-oxophytodienoate reductase that is required for jasmonate biosynthesis. Mutants are male sterile and defective in pollen dehiscence. OPDA-REDUCTASE 3 (OPR3); FUNCTIONS IN: 12-oxophytodienoate reductase activity; INVOLVED IN: response to jasmonic acid stimulus, response to fungus, jasmonic acid biosynthetic process,…	GO:0009611|response to wounding GO:0016629|12-oxophytodienoate reductase activity GO:0009695|jasmonic acid biosynthetic process GO:0005777|peroxisome GO:0010193|response to ozone
AT2G10940	4973	6382	20584	2062	877	1988	3443	4435	8041	1202	877	714	1.92749e-14	3.10703e-11	protein_coding protease inhibitor/seed storage/lipid transfer protein (LTP) family protein protease inhibitor/seed storage/lipid transfer protein (LTP) family protein; FUNCTIONS IN: lipid binding; INVOLVED IN: lipid transport; LOCATED IN: chloroplast thylakoid membrane, apoplast, chloroplast, membrane; EXPRESSED IN: 21 plant structures; EXPRESSED DURING: 13 growth stages; CONTAINS InterPro DOMAIN…	GO:0008289|lipid binding GO:0009535|chloroplast thylakoid membrane GO:0006869|lipid transport
AT2G13360	7511	6840	6297	4176	1780	4196	5256	4809	2390	2359	1780	1515	0.000306925	0.0265362	protein_coding AGT (ALANINE:GLYOXYLATE AMINOTRANSFERASE); alanine-glyoxylate transaminase/ serine-glyoxylate transaminase/ serine-pyruvate transaminase Encodes a peroxisomal photorespiratory enzyme that catalyzes transamination reactions with multiple substrates. It is involved in photorespiration. ALANINE:GLYOXYLATE AMINOTRANSFERASE (AGT); FUNCTIONS IN: serine-pyruvate transaminase activity, ser…	GO:0050281|serine-glyoxylate transaminase activity GO:0004760|serine-pyruvate transaminase activity GO:0008453|alanine-glyoxylate transaminase activity GO:0009853|photorespiration GO:0005777|peroxisome
AT2G14890	1606	3470	1254	632	534	1105	1092	2454	472	368	534	406	3.68597e-05	0.00538022	protein_coding AGP9 (ARABINOGALACTAN PROTEIN 9) putative proline-rich protein (At2g14890) mRNA, complete ARABINOGALACTAN PROTEIN 9 (AGP9); LOCATED IN: anchored to membrane; EXPRESSED IN: 22 plant structures; EXPRESSED DURING: 13 growth stages; Has 238895 Blast hits to 82305 proteins in 2376 species: Archae - 815; Bacteria - 53893; Metazoa - 90999; Fungi - 29732; Plants - 22205; Viruses - 6626; Ot…	GO:0003674|molecular_function GO:0031225|anchored to membrane
AT2G15390	104	44	165	472	199	648	64	30	67	281	199	241	7.86877e-05	0.0095203	protein_coding FUT4; fucosyltransferase/ transferase, transferring glycosyl groups Predicted fucosyltransferase, based on similarity to FUT1, but not functionally redundant with FUT1. FUT4; FUNCTIONS IN: transferase activity, transferring glycosyl groups, fucosyltransferase activity; INVOLVED IN: cell wall biogenesis; LOCATED IN: endomembrane system, membrane; EXPRESSED IN: 13 plant structures; E…	GO:0012505|endomembrane system GO:0016020|membrane GO:0008417|fucosyltransferase activity GO:0016757|transferase activity transferring glycosyl groups GO:0042546|cell wall biogenesis
AT2G15970	2090	2179	4484	1177	599	1614	1443	1510	1763	688	599	563	0.000329143	0.0279244	protein_coding COR413-PM1 encodes an alpha form of a protein similar to the cold acclimation protein WCOR413 in wheat. Expression is induced by short-term cold-treatment, water deprivation, and abscisic acid treatment. COR413-PM1; FUNCTIONS IN: molecular_function unknown; INVOLVED IN: cold acclimation, cellular response to water deprivation, response to abscisic acid stimulus; LOCATED IN: plasma …	GO:0003674|molecular_function GO:0005886|plasma membrane GO:0042631|cellular response to water deprivation GO:0009737|response to abscisic acid stimulus GO:0009631|cold acclimation
AT2G17740	64	53	31	882	472	1267	51	38	14	495	472	453	1.7849e-12	1.94633e-09	protein_coding DC1 domain-containing protein DC1 domain-containing protein; LOCATED IN: cellular_component unknown; EXPRESSED IN: 9 plant structures; EXPRESSED DURING: 6 growth stages; CONTAINS InterPro DOMAIN/s: DC1 (InterPro:IPR004146), C1-like (InterPro:IPR011424); BEST Arabidopsis thaliana protein match is: DC1 domain-containing protein (TAIR:AT2G44370.1); Has 1570 Blast hits to 551 proteins …	GO:0005575|cellular_component
AT2G18020	37	19	61	137	219	60	26	13	23	83	219	21	0.000235831	0.0216958	protein_coding EMB2296 (embryo defective 2296); structural constituent of ribosome embryo defective 2296 (EMB2296); FUNCTIONS IN: structural constituent of ribosome; INVOLVED IN: embryonic development ending in seed dormancy, translation; LOCATED IN: in 7 components; EXPRESSED IN: male gametophyte, guard cell, cultured cell; EXPRESSED DURING: L mature pollen stage, M germinated pollen stage; CONT…	GO:0005840|ribosome GO:0022625|cytosolic large ribosomal subunit GO:0006412|translation GO:0003735|structural constituent of ribosome GO:0022626|cytosolic ribosome GO:0009793|embryonic development ending in seed dormancy
AT2G18690	139	85	117	655	379	496	96	61	34	370	379	179	1.51539e-05	0.00258907	protein_coding unknown protein unknown protein; FUNCTIONS IN: molecular_function unknown; INVOLVED IN: biological_process unknown; LOCATED IN: membrane; EXPRESSED IN: 17 plant structures; EXPRESSED DURING: 9 growth stages; BEST Arabidopsis thaliana protein match is: unknown protein (TAIR:AT2G18680.1); Has 115 Blast hits to 113 proteins in 14 species: Archae - 0; Bacteria - 8; Metazoa - 0; Fungi -…	GO:0012505|endomembrane system GO:0003674|molecular_function GO:0008150|biological_process
AT2G19190	62	40	69	1328	625	1876	35	29	27	740	625	679	1.25943e-17	3.1129e-14	protein_coding FRK1 (FLG22-INDUCED RECEPTOR-LIKE KINASE 1); kinase Receptor-like protein kinase. Involved in early defense signaling. FLG22-INDUCED RECEPTOR-LIKE KINASE 1 (FRK1); FUNCTIONS IN: kinase activity; INVOLVED IN: defense response to bacterium; LOCATED IN: endomembrane system; EXPRESSED IN: stem, sepal, stamen; EXPRESSED DURING: 4 anthesis; CONTAINS InterPro DOMAIN/s: Protein kinase, ATP…	GO:0012505|endomembrane system GO:0016301|kinase activity GO:0042742|defense response to bacterium
AT2G21330	836	772	2990	380	137	1000	596	570	1139	214	137	409	0.000203607	0.019257	protein_coding fructose-bisphosphate aldolase, putative fructose-bisphosphate aldolase, putative; FUNCTIONS IN: fructose-bisphosphate aldolase activity, catalytic activity; INVOLVED IN: response to cadmium ion, pentose-phosphate shunt; LOCATED IN: in 8 components; EXPRESSED IN: 25 plant structures; EXPRESSED DURING: 14 growth stages; CONTAINS InterPro DOMAIN/s: Aldolase-type TIM barrel (InterPro:…	GO:0010287|plastoglobule GO:0006098|pentose-phosphate shunt GO:0004332|fructose-bisphosphate aldolase activity GO:0003824|catalytic activity GO:0009570|chloroplast stroma
AT2G22470	813	646	1880	1203	1567	5480	551	462	704	716	1567	1998	0.000548641	0.040592	protein_coding AGP2 (ARABINOGALACTAN PROTEIN 2) Encodes arabinogalactan-protein (AGP2). ARABINOGALACTAN PROTEIN 2 (AGP2); LOCATED IN: anchored to membrane, cytoplasm; EXPRESSED IN: 8 plant structures; EXPRESSED DURING: 4 anthesis, petal differentiation and expansion stage; Has 37257 Blast hits to 16083 proteins in 1034 species: Archae - 298; Bacteria - 10308; Metazoa - 8220; Fungi - 3221; Plants …	GO:0003674|molecular_function GO:0031225|anchored to membrane GO:0005737|cytoplasm
AT2G22880	38	61	112	180	226	653	24	40	47	97	226	249	4.45248e-05	0.00613664	protein_coding VQ motif-containing protein VQ motif-containing protein; FUNCTIONS IN: molecular_function unknown; INVOLVED IN: biological_process unknown; LOCATED IN: chloroplast; EXPRESSED IN: 8 plant structures; EXPRESSED DURING: LP.06 six leaves visible, LP.04 four leaves visible, LP.10 ten leaves visible, LP.12 twelve leaves visible, LP.08 eight leaves visible; CONTAINS InterPro DOMAIN/s: VQ …	GO:0003674|molecular_function GO:0008150|biological_process GO:0009507|chloroplast
AT2G23320	100	87	177	444	360	904	70	61	56	265	360	319	9.44872e-06	0.00176036	protein_coding WRKY15; calmodulin binding / transcription factor Encodes WRKY DNA-binding protein 15 (WRKY15). WRKY15; FUNCTIONS IN: transcription factor activity, calmodulin binding; INVOLVED IN: response to chitin, regulation of transcription, DNA-dependent; LOCATED IN: nucleus; EXPRESSED IN: 24 plant structures; EXPRESSED DURING: 15 growth stages; CONTAINS InterPro DOMAIN/s: DNA-binding WRKY (…	GO:0005634|nucleus GO:0010200|response to chitin GO:0006355|regulation of transcription DNA-dependent GO:0005516|calmodulin binding GO:0003700|transcription factor activity
AT2G24570	54	68	69	272	187	313	40	51	24	159	187	116	0.000660228	0.0474379	protein_coding WRKY17; calmodulin binding / transcription factor member of WRKY Transcription Factor; Group II-d; negative regulator of basal resistance to Pseudomonas syringae. WRKY17; FUNCTIONS IN: transcription factor activity, calmodulin binding; INVOLVED IN: defense response to bacterium, response to chitin, regulation of transcription, DNA-dependent; LOCATED IN: nucleus; EXPRESSED IN: 22 pl…	GO:0005634|nucleus GO:0010200|response to chitin GO:0006355|regulation of transcription DNA-dependent GO:0042742|defense response to bacterium GO:0005516|calmodulin binding GO:0003700|transcription factor activity
AT2G24850	665	291	3796	4183	1345	14221	461	200	1483	2442	1345	5123	5.26579e-09	3.05045e-06	protein_coding TAT3 (TYROSINE AMINOTRANSFERASE 3); L-tyrosine:2-oxoglutarate aminotransferase/ transaminase Encodes a tyrosine aminotransferase that is responsive to treatment with jasmonic acid. TYROSINE AMINOTRANSFERASE 3 (TAT3); FUNCTIONS IN: transaminase activity, L-tyrosine:2-oxoglutarate aminotransferase activity; INVOLVED IN: response to jasmonic acid stimulus, biosynthetic process, respon…	GO:0009611|response to wounding GO:0005575|cellular_component GO:0009058|biosynthetic process GO:0004838|tyrosine transaminase activity GO:0008483|transaminase activity GO:0009753|response to jasmonic acid stimulus
AT2G25735	54	29	23	206	178	287	36	15	10	118	178	96	2.48064e-05	0.00388057	protein_coding unknown protein unknown protein; FUNCTIONS IN: molecular_function unknown; INVOLVED IN: biological_process unknown; EXPRESSED IN: 13 plant structures; EXPRESSED DURING: 8 growth stages; Has 10 Blast hits to 10 proteins in 4 species: Archae - 0; Bacteria - 0; Metazoa - 0; Fungi - 0; Plants - 10; Viruses - 0; Other Eukaryotes - 0 (source: NCBI BLink).	GO:0003674|molecular_function GO:0008150|biological_process
AT2G26440	594	361	1154	1756	993	2425	429	248	413	1019	993	902	0.000532036	0.0398461	protein_coding pectinesterase family protein pectinesterase family protein; FUNCTIONS IN: enzyme inhibitor activity, pectinesterase activity; INVOLVED IN: cell wall modification; LOCATED IN: endomembrane system, cell wall, plant-type cell wall; EXPRESSED IN: 20 plant structures; EXPRESSED DURING: 13 growth stages; CONTAINS InterPro DOMAIN/s: Pectinesterase, active site (InterPro:IPR018040), Pecti…	GO:0009505|plant-type cell wall GO:0030599|pectinesterase activity GO:0042545|cell wall modification
AT2G26560	302	104	429	864	493	1158	198	78	145	505	493	443	0.000171652	0.0169706	protein_coding PLA2A (PHOSPHOLIPASE A 2A); lipase/ nutrient reservoir encodes a lipid acyl hydrolase with wide substrate specificity that accumulates upon infection by fungal and bacterial pathogens. Protein is localized in the cytoplasm in healthy leaves, and in membranes in infected cells. PHOSPHOLIPASE A 2A (PLA2A); FUNCTIONS IN: lipase activity, nutrient reservoir activity; INVOLVED IN: respo…	GO:0016020|membrane GO:0045735|nutrient reservoir activity GO:0009626|plant-type hypersensitive response GO:0016298|lipase activity GO:0005737|cytoplasm GO:0006629|lipid metabolic process
AT2G27385	483	247	1996	127	72	398	327	170	756	83	72	121	1.10101e-05	0.00199122	protein_coding unknown protein unknown protein; FUNCTIONS IN: molecular_function unknown; INVOLVED IN: biological_process unknown; LOCATED IN: endomembrane system; BEST Arabidopsis thaliana protein match is: unknown protein (TAIR:AT5G22430.1); Has 15 Blast hits to 15 proteins in 5 species: Archae - 0; Bacteria - 0; Metazoa - 0; Fungi - 0; Plants - 15; Viruses - 0; Other Eukaryotes - 0 (source: NC…	GO:0003674|molecular_function GO:0012505|endomembrane system GO:0008150|biological_process
AT2G27660	216	95	128	1249	515	1558	148	65	52	733	515	578	7.60123e-09	4.20481e-06	protein_coding DC1 domain-containing protein DC1 domain-containing protein; FUNCTIONS IN: zinc ion binding; LOCATED IN: chloroplast; EXPRESSED IN: 12 plant structures; EXPRESSED DURING: 9 growth stages; CONTAINS InterPro DOMAIN/s: DC1 (InterPro:IPR004146), Zinc finger, ZZ-type (InterPro:IPR000433), C1-like (InterPro:IPR011424); BEST Arabidopsis thaliana protein match is: DC1 domain-containing pro…	GO:0008270|zinc ion binding GO:0009507|chloroplast
AT2G27690	106	95	73	853	450	640	70	76	35	494	450	224	2.17184e-07	7.38724e-05	protein_coding CYP94C1; fatty acid (omega-1)-hydroxylase/ oxygen binding Encodes a CYP94C1. Has highest omega-hydroxylase activity with 9,10-epoxystearic acid, while also metabolized lauric acid (C12:0) and C18 unsaturated fatty acids. Gene expression is induced in response to wounding and jasmonic acid treatment. CYP94C1; FUNCTIONS IN: fatty acid (omega-1)-hydroxylase activity, oxygen binding; I…	GO:0012505|endomembrane system GO:0019825|oxygen binding
AT2G29630	30	32	2	2	1	0	25	23	0	1	1	0	0.00030777	0.0265362	protein_coding THIC (ThiaminC); ADP-ribose pyrophosphohydrolase/ catalytic/ iron-sulfur cluster binding Encodes a protein involved in thiamine biosynthesis. The protein is an iron-sulfur cluster protein predicted to catalyze the conversion of 5-aminoimidazole ribonucleotide (AIR) to hydroxymethylpyrimidine phosphate (HMP-P). A severe reduction of THIC levels in plants decreases vitamin B1 (thiami…	GO:0009228|thiamin biosynthetic process GO:0003824|catalytic activity GO:0009536|plastid GO:0051536|iron-sulfur cluster binding GO:0009570|chloroplast stroma GO:0009507|chloroplast
AT2G30490	343	208	432	1066	668	1967	229	144	172	632	668	715	2.61418e-05	0.00405525	protein_coding C4H (CINNAMATE-4-HYDROXYLASE); trans-cinnamate 4-monooxygenase Encodes a cinnamate-4-hydroxylase. CINNAMATE-4-HYDROXYLASE (C4H); FUNCTIONS IN: trans-cinnamate 4-monooxygenase activity; INVOLVED IN: phenylpropanoid biosynthetic process, response to light stimulus, response to wounding; LOCATED IN: endoplasmic reticulum, plasma membrane, membrane, plant-type cell wall; EXPRESSED IN: …	GO:0009611|response to wounding GO:0005783|endoplasmic reticulum GO:0009505|plant-type cell wall GO:0009699|phenylpropanoid biosynthetic process GO:0009416|response to light stimulus GO:0016710|trans-cinnamate 4-monooxygenase activity
AT2G30750	12	12	26	216	398	559	7	8	7	132	398	199	3.60015e-14	5.13367e-11	protein_coding CYP71A12 (cytochrome P450, family 71, subfamily A, polypeptide 12); electron carrier/ heme binding / iron ion binding / monooxygenase/ oxygen binding putative cytochrome P450 cytochrome P450, family 71, subfamily A, polypeptide 12 (CYP71A12); FUNCTIONS IN: electron carrier activity, monooxygenase activity, iron ion binding, oxygen binding, heme binding; INVOLVED IN: response to bac…	GO:0012505|endomembrane system GO:0019825|oxygen binding GO:0009617|response to bacterium
AT2G30860	1	2	22	62	41	27	1	1	8	40	41	11	0.000457735	0.0358995	protein_coding ATGSTF9 (GLUTATHIONE S-TRANSFERASE PHI 9); copper ion binding / glutathione binding / glutathione peroxidase/ glutathione transferase Encodes glutathione transferase belonging to the phi class of GSTs. Naming convention according to Wagner et al. (2002). GLUTATHIONE S-TRANSFERASE PHI 9 (ATGSTF9); FUNCTIONS IN: glutathione transferase activity, glutathione peroxidase activity, coppe…	GO:0004364|glutathione transferase activity GO:0009407|toxin catabolic process GO:0006952|defense response GO:0004602|glutathione peroxidase activity GO:0005737|cytoplasm
AT2G32690	10275	13496	2806	4241	1828	2814	7146	9475	1097	2493	1828	1007	1.83926e-08	8.85592e-06	protein_coding GRP23 (GLYCINE-RICH PROTEIN 23) Glycine-rich protein similar in structure to GRP5. The expression of GRP23 is induced by HPA (cutin monomer, salicylic acid, and abscisic acid. GLYCINE-RICH PROTEIN 23 (GRP23); INVOLVED IN: response to abscisic acid stimulus, response to salicylic acid stimulus; LOCATED IN: endomembrane system; EXPRESSED IN: 21 plant structures; EXPRESSED DURING: 13 …	none
AT2G33780	0	23	5	80	53	140	0	21	2	48	53	50	0.000491324	0.037636	protein_coding VQ motif-containing protein VQ motif-containing protein; FUNCTIONS IN: molecular_function unknown; INVOLVED IN: biological_process unknown; LOCATED IN: cellular_component unknown; CONTAINS InterPro DOMAIN/s: VQ (InterPro:IPR008889); BEST Arabidopsis thaliana protein match is: VQ motif-containing protein (TAIR:AT1G28280.2); Has 99 Blast hits to 99 proteins in 16 species: Archae - 0;…	GO:0003674|molecular_function GO:0005575|cellular_component GO:0008150|biological_process
AT2G35930	109	67	91	646	281	1243	79	53	32	378	281	453	1.51367e-07	5.29427e-05	protein_coding PUB23 (PLANT U-BOX 23); ubiquitin-protein ligase Encodes a cytoplasmically localized U-box domain containing E3 ubiquitin ligase that is involved in the response to water stress and acts as a negative regulator of PAMP-triggered immunity. PLANT U-BOX 23 (PUB23); FUNCTIONS IN: ubiquitin-protein ligase activity; INVOLVED IN: in 6 processes; LOCATED IN: cytosol; EXPRESSED IN: 14 plant…	GO:0010200|response to chitin GO:0009414|response to water deprivation GO:0005829|cytosol GO:0016567|protein ubiquitination GO:0004842|ubiquitin-protein ligase activity
AT2G35980	108	83	254	820	441	1660	78	56	94	472	441	596	4.0585e-08	1.70987e-05	protein_coding YLS9 (YELLOW-LEAF-SPECIFIC GENE 9) Encodes a protein whose sequence is similar to tobacco hairpin-induced gene (HIN1) and Arabidopsis non-race specific disease resistance gene (NDR1). Expression of this gene is induced by cucumber mosaic virus, spermine and during senescence. The gene product is localized to the chloroplast. YELLOW-LEAF-SPECIFIC GENE 9 (YLS9); FUNCTIONS IN: molecul…	GO:0003674|molecular_function GO:0051607|defense response to virus GO:0051707|response to other organism GO:0009507|chloroplast
AT2G36580	58	51	106	231	99	538	35	34	37	142	99	192	0.000676618	0.0483345	protein_coding pyruvate kinase, putative pyruvate kinase, putative; FUNCTIONS IN: pyruvate kinase activity, potassium ion binding, magnesium ion binding, catalytic activity; INVOLVED IN: glycolysis; LOCATED IN: plasma membrane; EXPRESSED IN: guard cell; CONTAINS InterPro DOMAIN/s: Pyruvate/Phosphoenolpyruvate kinase, catalytic core (InterPro:IPR015813), Pyruvate kinase, alpha/beta (InterPro:IPR01…	GO:0005575|cellular_component GO:0004743|pyruvate kinase activity GO:0006096|glycolysis
AT2G36690	0	8	1	108	103	156	0	3	0	55	103	52	3.69922e-10	2.58771e-07	protein_coding oxidoreductase, 2OG-Fe(II) oxygenase family protein oxidoreductase, 2OG-Fe(II) oxygenase family protein; FUNCTIONS IN: oxidoreductase activity, acting on paired donors, with incorporation or reduction of molecular oxygen, 2-oxoglutarate as one donor, and incorporation of one atom each of oxygen into both donors, oxidoreductase activity; INVOLVED IN: biosynthetic process; LOCATED IN…	GO:0005575|cellular_component GO:0009058|biosynthetic process GO:0016706|oxidoreductase activity acting on paired donors with incorporation or reduction of molecular oxygen 2-oxoglutarate as one donor and incorporation of one atom each of oxygen into both donors
AT2G36880	500	472	1513	2126	1176	3283	345	324	587	1260	1176	1242	9.32707e-05	0.0108402	protein_coding MAT3 (methionine adenosyltransferase 3); copper ion binding / methionine adenosyltransferase methionine adenosyltransferase 3 (MAT3); FUNCTIONS IN: copper ion binding, methionine adenosyltransferase activity; INVOLVED IN: one-carbon compound metabolic process, S-adenosylmethionine biosynthetic process; LOCATED IN: plasma membrane; EXPRESSED IN: 27 plant structures; EXPRESSED DURING…	GO:0005575|cellular_component GO:0004478|methionine adenosyltransferase activity GO:0006556|S-adenosylmethionine biosynthetic process
AT2G37040	309	190	437	1278	722	2808	216	134	172	758	722	981	4.32204e-07	0.000135796	protein_coding pal1 (Phe ammonia lyase 1); phenylalanine ammonia-lyase encodes a protein similar to phenylalanine ammonia-lyase Phe ammonia lyase 1 (pal1); FUNCTIONS IN: phenylalanine ammonia-lyase activity; INVOLVED IN: response to oxidative stress, phenylpropanoid biosynthetic process, response to wounding, defense response; LOCATED IN: cytoplasm; EXPRESSED IN: 22 plant structures; EXPRESSED DU…	GO:0009611|response to wounding GO:0006979|response to oxidative stress GO:0045548|phenylalanine ammonia-lyase activity GO:0009699|phenylpropanoid biosynthetic process GO:0006952|defense response GO:0005737|cytoplasm
AT2G37220	5158	7208	6490	2705	1440	3679	3587	5054	2529	1559	1440	1353	2.9541e-05	0.00447033	protein_coding 29 kDa ribonucleoprotein, chloroplast, putative / RNA-binding protein cp29, putative Encodes a chloroplast RNA binding protein. A substrate of the type III effector HopU1 (mono-ADP-ribosyltransferase). Protein is tyrosine-phosphorylated and its phosphorylation state is modulated in response to ABA in Arabidopsis thaliana seeds. 29 kDa ribonucleoprotein, chloroplast, putative / RNA-…	GO:0003723|RNA binding GO:0009409|response to cold GO:0008266|poly(U) binding GO:0010319|stromule GO:0045087|innate immune response
AT2G37430	2	37	22	41	188	133	1	24	11	23	188	52	4.0788e-05	0.0057317	protein_coding zinc finger (C2H2 type) family protein (ZAT11) zinc finger (C2H2 type) family protein (ZAT11); FUNCTIONS IN: transcription factor activity, zinc ion binding, nucleic acid binding; INVOLVED IN: response to chitin, regulation of transcription; LOCATED IN: intracellular; EXPRESSED IN: cotyledon, root, petiole; CONTAINS InterPro DOMAIN/s: Zinc finger, C2H2-like (InterPro:IPR015880), Zi…	GO:0010200|response to chitin GO:0008270|zinc ion binding GO:0005622|intracellular GO:0045449|regulation of transcription GO:0003700|transcription factor activity GO:0003676|nucleic acid binding
AT2G37710	593	371	835	1875	724	2769	407	261	323	1107	724	983	0.000276994	0.0248057	protein_coding RLK (receptor lectin kinase); kinase Induced in response to Salicylic acid. receptor lectin kinase (RLK); FUNCTIONS IN: kinase activity; INVOLVED IN: response to salicylic acid stimulus; LOCATED IN: plasma membrane; EXPRESSED IN: 23 plant structures; EXPRESSED DURING: 13 growth stages; CONTAINS InterPro DOMAIN/s: Legume lectin, beta domain (InterPro:IPR001220), Protein kinase, ATP …	GO:0009751|response to salicylic acid stimulus GO:0012505|endomembrane system GO:0016301|kinase activity
AT2G38240	1425	1327	1707	4519	2182	5360	999	924	679	2646	2182	1922	0.000104502	0.0117763	protein_coding oxidoreductase, 2OG-Fe(II) oxygenase family protein oxidoreductase, 2OG-Fe(II) oxygenase family protein; FUNCTIONS IN: oxidoreductase activity; INVOLVED IN: response to salt stress; EXPRESSED IN: 11 plant structures; EXPRESSED DURING: 6 growth stages; CONTAINS InterPro DOMAIN/s: 2OG-Fe(II) oxygenase (InterPro:IPR005123); BEST Arabidopsis thaliana protein match is: oxidoreductase, 2…	GO:0005506|iron ion binding GO:0016491|oxidoreductase activity
AT2G38470	463	282	428	897	1114	1688	328	197	179	546	1114	624	9.18529e-05	0.010771	protein_coding WRKY33; transcription factor Member of the plant WRKY transcription factor family. Regulates the antagonistic relationship between defense pathways mediating responses to P. syringae and necrotrophic fungal pathogens. Located in nucleus. Involved in response to various abiotic stresses - especially salt stress. WRKY33; FUNCTIONS IN: transcription factor activity; INVOLVED IN: in 10…	GO:0050832|defense response to fungus GO:0010120|camalexin biosynthetic process GO:0005634|nucleus GO:0010200|response to chitin GO:0006355|regulation of transcription DNA-dependent GO:0042742|defense response to bacterium GO:0003700|transcription factor activity
AT2G38790	28	20	46	118	161	65	18	17	13	67	161	23	0.000462586	0.0359833	protein_coding unknown protein unknown protein; FUNCTIONS IN: molecular_function unknown; INVOLVED IN: biological_process unknown; LOCATED IN: cellular_component unknown; EXPRESSED IN: 15 plant structures; EXPRESSED DURING: 9 growth stages; Has 7 Blast hits to 7 proteins in 2 species: Archae - 0; Bacteria - 0; Metazoa - 0; Fungi - 0; Plants - 5; Viruses - 0; Other Eukaryotes - 2 (source: NCBI BLi…	GO:0003674|molecular_function GO:0005575|cellular_component GO:0008150|biological_process
AT2G38870	992	1168	597	3971	2527	6258	677	801	230	2315	2527	2255	1.91688e-08	9.1113e-06	protein_coding protease inhibitor, putative Predicted to encode a PR (pathogenesis-related) peptide that belongs to the PR-6 proteinase inhibitor family. Six putative PR-6-type protein encoding genes are found in Arabidopsis: At2g38900, At2g38870, At5g43570, At5g43580, At3g50020 and At3g46860. protease inhibitor, putative; FUNCTIONS IN: serine-type endopeptidase inhibitor activity; INVOLVED IN: d…	GO:0050832|defense response to fungus GO:0009611|response to wounding GO:0005575|cellular_component GO:0004867|serine-type endopeptidase inhibitor activity
AT2G38940	7	16	22	80	122	213	3	9	7	44	122	75	1.31681e-06	0.000338515	protein_coding ATPT2 (ARABIDOPSIS THALIANA PHOSPHATE TRANSPORTER 2); carbohydrate transmembrane transporter/ inorganic phosphate transmembrane transporter/ phosphate transmembrane transporter/ sugar:hydrogen symporter phosphate transporter (AtPT2) ARABIDOPSIS THALIANA PHOSPHATE TRANSPORTER 2 (ATPT2); FUNCTIONS IN: phosphate transmembrane transporter activity, carbohydrate transmembrane transporte…	GO:0016020|membrane GO:0006810|transport GO:0006817|phosphate transport GO:0015114|phosphate transmembrane transporter activity GO:0005315|inorganic phosphate transmembrane transporter activity GO:0015144|carbohydrate transmembrane transporter activity GO:0005351|sugar:hydrogen symporter activity
AT2G39010	1425	2263	1266	769	249	637	1046	1578	501	451	249	221	1.97449e-05	0.00323912	protein_coding PIP2E (PLASMA MEMBRANE INTRINSIC PROTEIN 2E); water channel PLASMA MEMBRANE INTRINSIC PROTEIN 2E (PIP2E); FUNCTIONS IN: water channel activity; INVOLVED IN: transport, response to nematode; LOCATED IN: plasma membrane, membrane; EXPRESSED IN: 23 plant structures; EXPRESSED DURING: 13 growth stages; CONTAINS InterPro DOMAIN/s: Aquaporin (InterPro:IPR012269), Major intrinsic protein …	GO:0006810|transport GO:0015250|water channel activity GO:0016020|membrane GO:0009624|response to nematode
AT2G39200	283	222	285	3544	2409	8119	210	150	106	2085	2409	2963	6.56144e-23	1.87185e-19	protein_coding MLO12 (MILDEW RESISTANCE LOCUS O 12); calmodulin binding A member of a large family of seven-transmembrane domain proteins specific to plants, homologs of the barley mildew resistance locus o (MLO) protein. The Arabidopsis genome contains 15 genes encoding MLO proteins, with localization in plasma membrane. Phylogenetic analysis revealed four clades of closely-related AtMLO genes. …	GO:0009817|defense response to fungus incompatible interaction GO:0006952|defense response GO:0008219|cell death GO:0005516|calmodulin binding GO:0005886|plasma membrane
AT2G39210	135	109	279	964	314	1491	99	74	105	569	314	556	1.30273e-06	0.000337754	protein_coding nodulin family protein nodulin family protein; FUNCTIONS IN: molecular_function unknown; INVOLVED IN: biological_process unknown; LOCATED IN: cellular_component unknown; EXPRESSED IN: 22 plant structures; EXPRESSED DURING: 13 growth stages; CONTAINS InterPro DOMAIN/s: Nodulin-like (InterPro:IPR010658), Major facilitator superfamily, general substrate transporter (InterPro:IPR016196…	GO:0003674|molecular_function GO:0005575|cellular_component GO:0008150|biological_process
AT2G39380	11	8	19	371	214	754	9	5	8	195	214	284	1.10303e-13	1.41017e-10	protein_coding ATEXO70H2 (EXOCYST SUBUNIT EXO70 FAMILY PROTEIN H2); protein binding A member of EXO70 gene family, putative exocyst subunits, conserved in land plants. Arabidopsis thaliana contains 23 putative EXO70 genes, which can be classified into eight clusters on the phylogenetic tree. EXOCYST SUBUNIT EXO70 FAMILY PROTEIN H2 (ATEXO70H2); FUNCTIONS IN: protein binding; INVOLVED IN: exocytosi…	GO:0005515|protein binding GO:0000145|exocyst GO:0006904|vesicle docking during exocytosis
AT2G39420	45	18	37	338	117	214	31	10	15	205	117	89	6.81494e-06	0.00134396	protein_coding esterase/lipase/thioesterase family protein esterase/lipase/thioesterase family protein; FUNCTIONS IN: catalytic activity; EXPRESSED IN: 24 plant structures; EXPRESSED DURING: 15 growth stages; CONTAINS InterPro DOMAIN/s: Alpha/beta hydrolase fold-1 (InterPro:IPR000073); BEST Arabidopsis thaliana protein match is: hydrolase, alpha/beta fold family protein (TAIR:AT2G39410.2); Has 27…	GO:0003824|catalytic activity
AT2G39518	122	48	67	738	547	932	86	32	20	441	547	338	5.38432e-10	3.50217e-07	protein_coding FUNCTIONS IN: molecular_function unknown; INVOLVED IN: biological_process unknown; LOCATED IN: endomembrane system; CONTAINS InterPro DOMAIN/s: Uncharacterised protein family UPF0497, trans-membrane plant (InterPro:IPR006702), Uncharacterised protein family UPF0497, trans-membrane plant subgroup (InterPro:IPR006459); BEST Arabidopsis thaliana protein match is: integral membrane pro…	GO:0012505|endomembrane system
AT2G39530	29	31	70	732	682	1614	21	24	24	417	682	578	4.99247e-17	1.0888e-13	protein_coding integral membrane protein, putative integral membrane protein, putative; FUNCTIONS IN: molecular_function unknown; INVOLVED IN: biological_process unknown; LOCATED IN: membrane; EXPRESSED IN: sepal, root, stamen; EXPRESSED DURING: 4 anthesis; CONTAINS InterPro DOMAIN/s: Uncharacterised protein family UPF0497, trans-membrane plant (InterPro:IPR006702), Uncharacterised protein family…	GO:0003674|molecular_function GO:0016020|membrane GO:0008150|biological_process
AT2G39730	10392	9695	30233	5603	2729	18249	7306	6826	11903	3243	2729	6538	0.000143071	0.0147754	protein_coding RCA (RUBISCO ACTIVASE); ADP binding / ATP binding / enzyme regulator/ ribulose-1,5-bisphosphate carboxylase/oxygenase activator Rubisco activase, a nuclear-encoded chloroplast protein that consists of two isoforms arising from alternative splicing in most plants. Required for the light activation of rubisco. RUBISCO ACTIVASE (RCA); FUNCTIONS IN: ADP binding, enzyme regulator activi…	GO:0010287|plastoglobule GO:0009535|chloroplast thylakoid membrane GO:0005524|ATP binding GO:0009409|response to cold GO:0030234|enzyme regulator activity GO:0009416|response to light stimulus GO:0043531|ADP binding GO:0046863|ribulose-1 5-bisphosphate carboxylase/oxygenase activase activity GO:0010319|stromule GO:0009507|chloroplast
AT2G40610	270	143	123	52	20	11	180	107	55	29	20	2	2.91803e-05	0.0044521	protein_coding ATEXPA8 (ARABIDOPSIS THALIANA EXPANSIN A8) member of Alpha-Expansin Gene Family. Naming convention from the Expansin Working Group (Kende et al, 2004. Plant Mol Bio). Involved in the formation of nematode-induced syncytia in roots of Arabidopsis thaliana. ARABIDOPSIS THALIANA EXPANSIN A8 (ATEXPA8); INVOLVED IN: syncytium formation, plant-type cell wall modification during multidime…	GO:0003674|molecular_function GO:0012505|endomembrane system GO:0009826|unidimensional cell growth GO:0009831|plant-type cell wall modification during multidimensional cell growth GO:0009828|plant-type cell wall loosening GO:0005576|extracellular region GO:0006949|syncytium formation
AT2G40740	7	0	3	20	48	19	5	0	1	14	48	6	0.000584978	0.0427681	protein_coding WRKY55; transcription factor member of WRKY Transcription Factor; Group III WRKY55; FUNCTIONS IN: transcription factor activity; INVOLVED IN: regulation of transcription, DNA-dependent; LOCATED IN: nucleus; EXPRESSED IN: stem, sperm cell, stamen; EXPRESSED DURING: 4 anthesis; CONTAINS InterPro DOMAIN/s: DNA-binding WRKY (InterPro:IPR003657); BEST Arabidopsis thaliana protein match …	GO:0005634|nucleus GO:0006355|regulation of transcription DNA-dependent GO:0003700|transcription factor activity
AT2G41010	78	63	275	207	209	1050	49	45	99	118	209	367	0.000637779	0.0460045	protein_coding ATCAMBP25 (ARABIDOPSIS THALIANA CALMODULIN (CAM)-BINDING PROTEIN OF 25 KDA); calmodulin binding Encodes a novel calmodulin binding protein whose gene expression is induced by dehydration and ionic (salt) and non-ionic (mannitol) osmotic stress. Lines over-expressing this gene are more sensitive and anti-sense lines are more tolerant to osmotic stress, suggesting this gene may be a …	GO:0005634|nucleus GO:0009414|response to water deprivation GO:0009651|response to salt stress GO:0010337|regulation of salicylic acid metabolic process GO:0005516|calmodulin binding
AT2G42060	0	1	0	20	27	63	0	0	0	15	27	26	1.00661e-06	0.000272409	protein_coding CHP-rich zinc finger protein, putative CHP-rich zinc finger protein, putative; INVOLVED IN: intracellular signaling cascade; LOCATED IN: cellular_component unknown; EXPRESSED IN: root; CONTAINS InterPro DOMAIN/s: Protein kinase C, phorbol ester/diacylglycerol binding (InterPro:IPR002219), C1-like (InterPro:IPR011424); BEST Arabidopsis thaliana protein match is: DC1 domain-containin…	GO:0005575|cellular_component GO:0007242|intracellular signaling cascade
AT2G42360	82	52	96	220	200	766	53	33	34	136	200	276	3.9139e-05	0.00562433	protein_coding zinc finger (C3HC4-type RING finger) family protein zinc finger (C3HC4-type RING finger) family protein; FUNCTIONS IN: ubiquitin-protein ligase activity, protein binding, zinc ion binding; EXPRESSED IN: stem, leaf whorl, sepal, stamen, leaf; EXPRESSED DURING: LP.06 six leaves visible, 4 anthesis; CONTAINS InterPro DOMAIN/s: Zinc finger, RING-type (InterPro:IPR001841), Zinc finger, …	GO:0005515|protein binding GO:0008270|zinc ion binding GO:0004842|ubiquitin-protein ligase activity
AT2G43620	750	631	878	7155	3735	10470	519	456	338	4202	3735	3804	1.11258e-18	2.94634e-15	protein_coding chitinase, putative chitinase, putative; FUNCTIONS IN: chitin binding, chitinase activity; INVOLVED IN: response to salt stress; LOCATED IN: apoplast; EXPRESSED IN: 12 plant structures; EXPRESSED DURING: 11 growth stages; CONTAINS InterPro DOMAIN/s: Chitin-binding, type 1, conserved site (InterPro:IPR018371), Glycoside hydrolase, family 19 (InterPro:IPR016283), Chitin-binding, type…	GO:0012505|endomembrane system GO:0004568|chitinase activity
AT2G44370	13	9	9	259	154	515	12	8	3	164	154	183	1.07565e-10	8.13868e-08	protein_coding DC1 domain-containing protein DC1 domain-containing protein; EXPRESSED IN: hypocotyl, root; CONTAINS InterPro DOMAIN/s: DC1 (InterPro:IPR004146), C1-like (InterPro:IPR011424); BEST Arabidopsis thaliana protein match is: DC1 domain-containing protein (TAIR:AT2G17740.1); Has 1603 Blast hits to 573 proteins in 27 species: Archae - 0; Bacteria - 0; Metazoa - 11; Fungi - 5; Plants - 157…	none
AT2G44380	19	7	14	182	118	195	10	6	5	100	118	71	2.66382e-07	8.66325e-05	protein_coding DC1 domain-containing protein DC1 domain-containing protein; EXPRESSED IN: 7 plant structures; EXPRESSED DURING: LP.06 six leaves visible, LP.10 ten leaves visible, LP.08 eight leaves visible; CONTAINS InterPro DOMAIN/s: DC1 (InterPro:IPR004146), C1-like (InterPro:IPR011424); BEST Arabidopsis thaliana protein match is: DC1 domain-containing protein (TAIR:AT5G43520.1); Has 1624 Blas…	none
AT2G45180	15923	16245	28137	6077	3776	6502	11138	11458	10952	3520	3776	2343	1.00342e-10	7.75034e-08	protein_coding protease inhibitor/seed storage/lipid transfer protein (LTP) family protein protease inhibitor/seed storage/lipid transfer protein (LTP) family protein; FUNCTIONS IN: lipid binding; INVOLVED IN: lipid transport; LOCATED IN: chloroplast thylakoid membrane; EXPRESSED IN: 22 plant structures; EXPRESSED DURING: 13 growth stages; CONTAINS InterPro DOMAIN/s: Bifunctional inhibitor/plant …	GO:0008289|lipid binding GO:0009535|chloroplast thylakoid membrane GO:0006869|lipid transport
AT2G45220	162	62	152	1299	914	2866	119	44	56	761	914	1033	1.80371e-14	3.03966e-11	protein_coding pectinesterase family protein pectinesterase family protein; FUNCTIONS IN: enzyme inhibitor activity, pectinesterase activity; INVOLVED IN: cell wall modification; LOCATED IN: membrane, plant-type cell wall; EXPRESSED IN: 9 plant structures; EXPRESSED DURING: 4 anthesis, C globular stage, petal differentiation and expansion stage; CONTAINS InterPro DOMAIN/s: Carbohydrate-binding an…	GO:0009505|plant-type cell wall GO:0030599|pectinesterase activity GO:0042545|cell wall modification
AT2G45290	46	25	106	278	197	720	37	19	38	168	197	245	4.00754e-06	0.000825442	protein_coding transketolase, putative transketolase, putative; FUNCTIONS IN: catalytic activity, transketolase activity; INVOLVED IN: response to cadmium ion; LOCATED IN: chloroplast stroma, chloroplast; EXPRESSED IN: 25 plant structures; EXPRESSED DURING: 15 growth stages; CONTAINS InterPro DOMAIN/s: Bacterial transketolase (InterPro:IPR005478), Transketolase, N-terminal (InterPro:IPR005474), T…	GO:0019658|glucose catabolic process to lactate and acetate GO:0008152|metabolic process GO:0019692|deoxyribose phosphate metabolic process GO:0019303|D-ribose catabolic process GO:0009052|pentose-phosphate shunt non-oxidative branch GO:0006015|5-phosphoribose 1-diphosphate biosynthetic process GO:0019648|formaldehyde assimilation via xylulose monophosphate cycle GO:0019253|reductive pentose-phos…
AT2G45300	77	110	272	466	233	1017	54	77	112	248	233	408	0.00030132	0.0261626	protein_coding 3-phosphoshikimate 1-carboxyvinyltransferase / 5-enolpyruvylshikimate-3-phosphate / EPSP synthase encodes 3-phosphoshikimate 1-carboxyvinyltransferase / 5-enolpyruvylshikimate-3-phosphate / EPSP synthase involved in chorismate biosynthesis 3-phosphoshikimate 1-carboxyvinyltransferase / 5-enolpyruvylshikimate-3-phosphate / EPSP synthase; FUNCTIONS IN: 3-phosphoshikimate 1-carboxyvin…	GO:0003866|3-phosphoshikimate 1-carboxyvinyltransferase activity GO:0009423|chorismate biosynthetic process GO:0009073|aromatic amino acid family biosynthetic process GO:0018920|glyphosate metabolic process GO:0009507|chloroplast
AT2G45360	0	0	2	37	15	61	0	0	0	22	15	19	5.05482e-06	0.00101403	protein_coding unknown protein unknown protein; FUNCTIONS IN: molecular_function unknown; INVOLVED IN: biological_process unknown; LOCATED IN: cellular_component unknown; CONTAINS InterPro DOMAIN/s: Protein of unknown function DUF1442 (InterPro:IPR009902); BEST Arabidopsis thaliana protein match is: unknown protein (TAIR:AT3G60780.1); Has 55 Blast hits to 55 proteins in 8 species: Archae - 0; Bac…	GO:0003674|molecular_function GO:0005575|cellular_component GO:0008150|biological_process
AT2G45570	71	35	132	217	167	506	55	23	46	123	167	211	0.000519904	0.0392575	protein_coding CYP76C2; electron carrier/ heme binding / iron ion binding / monooxygenase/ oxygen binding member of CYP76C CYP76C2; FUNCTIONS IN: electron carrier activity, monooxygenase activity, iron ion binding, oxygen binding, heme binding; EXPRESSED IN: stem, male gametophyte, sepal, carpel, stamen; EXPRESSED DURING: 4 anthesis; CONTAINS InterPro DOMAIN/s: Cytochrome P450 (InterPro:IPR001128…	GO:0006118|electron transport GO:0019825|oxygen binding
AT2G47650	142	115	387	504	268	1407	92	85	159	300	268	508	0.00068451	0.0485243	protein_coding UXS4 (UDP-XYLOSE SYNTHASE 4); UDP-glucuronate decarboxylase/ catalytic encodes a protein similar to UDP-glucuronic acid decarboxylase. UDP-glucuronic acid decarboxylase produces UDP-xylose, which is a substrate for many cell wall carbohydrates including hemicellulose and pectin. UDP-xylose is also known to feedback regulate several cell wall biosynthetic enzymes. UDP-XYLOSE SYNTHAS…	GO:0048040|UDP-glucuronate decarboxylase activity GO:0016020|membrane GO:0009225|nucleotide-sugar metabolic process GO:0005794|Golgi apparatus GO:0042732|D-xylose metabolic process GO:0003824|catalytic activity
AT3G01290	669	287	835	1561	1438	2266	460	199	322	894	1438	817	4.1547e-05	0.00580306	protein_coding band 7 family protein band 7 family protein; INVOLVED IN: N-terminal protein myristoylation; LOCATED IN: mitochondrion, plasma membrane, vacuole, membrane; EXPRESSED IN: 21 plant structures; EXPRESSED DURING: 9 growth stages; CONTAINS InterPro DOMAIN/s: Band 7 protein (InterPro:IPR001107); BEST Arabidopsis thaliana protein match is: band 7 family protein (TAIR:AT5G62740.1); Has 528…	GO:0016020|membrane GO:0006499|N-terminal protein myristoylation
AT3G06350	287	189	539	771	630	1901	195	140	201	451	630	676	0.000165093	0.0164538	protein_coding MEE32 (MATERNAL EFFECT EMBRYO ARREST 32); 3-dehydroquinate dehydratase/ NADP or NADPH binding / binding / catalytic/ shikimate 5-dehydrogenase MATERNAL EFFECT EMBRYO ARREST 32 (MEE32); FUNCTIONS IN: NADP or NADPH binding, 3-dehydroquinate dehydratase activity, shikimate 5-dehydrogenase activity, binding, catalytic activity; INVOLVED IN: embryonic development ending in seed dormancy…	GO:0003855|3-dehydroquinate dehydratase activity GO:0003824|catalytic activity GO:0005488|binding GO:0005737|cytoplasm GO:0050661|NADP binding GO:0009507|chloroplast GO:0004764|shikimate 5-dehydrogenase activity GO:0009793|embryonic development ending in seed dormancy
AT3G07195	78	57	313	313	417	1123	48	48	116	179	417	412	1.42549e-05	0.00244677	protein_coding proline-rich family protein proline-rich family protein; FUNCTIONS IN: molecular_function unknown; INVOLVED IN: biological_process unknown; LOCATED IN: cellular_component unknown; BEST Arabidopsis thaliana protein match is: defense protein-related (TAIR:AT5G48657.2); Has 4353 Blast hits to 3535 proteins in 378 species: Archae - 6; Bacteria - 1484; Metazoa - 1568; Fungi - 266; Plant…	GO:0003674|molecular_function GO:0005575|cellular_component GO:0008150|biological_process
AT3G07390	584	520	989	1726	992	4132	412	370	398	1026	992	1506	8.02919e-05	0.009665	protein_coding AIR12; extracellular matrix structural constituent isolated from differential screening of a cDNA library from auxin-treated root culture. sequence does not show homology to any known proteins and is predicted to be extracellular. AIR12; FUNCTIONS IN: extracellular matrix structural constituent; INVOLVED IN: response to auxin stimulus, lateral root morphogenesis, extracellular matr…	GO:0009733|response to auxin stimulus GO:0005201|extracellular matrix structural constituent GO:0030198|extracellular matrix organization and biogenesis GO:0005576|extracellular region GO:0010102|lateral root morphogenesis GO:0031225|anchored to membrane GO:0005886|plasma membrane
AT3G08600	327	517	186	110	62	113	211	364	82	58	62	36	0.000181351	0.0178819	protein_coding unknown protein unknown protein; FUNCTIONS IN: molecular_function unknown; INVOLVED IN: biological_process unknown; LOCATED IN: plasma membrane; EXPRESSED IN: 23 plant structures; EXPRESSED DURING: 13 growth stages; CONTAINS InterPro DOMAIN/s: Protein of unknown function DUF1191 (InterPro:IPR010605); BEST Arabidopsis thaliana protein match is: unknown protein (TAIR:AT4G22900.1); Ha…	none
AT3G08940	4750	3103	6619	2315	950	3372	3346	2194	2579	1332	950	1247	0.000410888	0.0331167	protein_coding LHCB4.2 (light harvesting complex PSII); chlorophyll binding Lhcb4.2 protein (Lhcb4.2, protein involved in the light harvesting complex of photosystem II light harvesting complex PSII (LHCB4.2); FUNCTIONS IN: chlorophyll binding; INVOLVED IN: response to blue light, response to red light, response to far red light; LOCATED IN: chloroplast thylakoid membrane, chloroplast, membrane, …	GO:0009535|chloroplast thylakoid membrane GO:0009765|photosynthesis light harvesting GO:0016168|chlorophyll binding
AT3G10020	8607	4804	1358	2955	1330	1311	5971	3387	530	1720	1330	463	8.23225e-06	0.00157571	protein_coding unknown protein unknown protein; FUNCTIONS IN: molecular_function unknown; INVOLVED IN: response to oxidative stress; LOCATED IN: cellular_component unknown; EXPRESSED IN: 23 plant structures; EXPRESSED DURING: 13 growth stages; Has 29 Blast hits to 29 proteins in 8 species: Archae - 0; Bacteria - 0; Metazoa - 1; Fungi - 0; Plants - 28; Viruses - 0; Other Eukaryotes - 0 (source: NC…	GO:0006979|response to oxidative stress GO:0003674|molecular_function GO:0005575|cellular_component GO:0008150|biological_process
AT3G11340	422	141	1830	2566	1238	5233	292	97	714	1535	1238	1918	1.06507e-07	3.87131e-05	protein_coding UDP-glucoronosyl/UDP-glucosyl transferase family protein UDP-glucoronosyl/UDP-glucosyl transferase family protein; FUNCTIONS IN: transferase activity, transferring hexosyl groups, UDP-glycosyltransferase activity; INVOLVED IN: metabolic process; LOCATED IN: endomembrane system; EXPRESSED IN: 8 plant structures; EXPRESSED DURING: 4 anthesis, LP.02 two leaves visible, petal different…	GO:0012505|endomembrane system GO:0008194|UDP-glycosyltransferase activity GO:0008152|metabolic process
AT3G13790	742	490	1019	2768	1927	4850	518	334	413	1601	1927	1773	7.54564e-08	2.88407e-05	protein_coding ATBFRUCT1; beta-fructofuranosidase/ hydrolase, hydrolyzing O-glycosyl compounds Encodes a protein with invertase activity. ATBFRUCT1; FUNCTIONS IN: hydrolase activity, hydrolyzing O-glycosyl compounds, beta-fructofuranosidase activity; INVOLVED IN: response to wounding; LOCATED IN: cell wall; EXPRESSED IN: 21 plant structures; EXPRESSED DURING: 13 growth stages; CONTAINS InterPro D…	GO:0009611|response to wounding GO:0012505|endomembrane system GO:0004553|hydrolase activity hydrolyzing O-glycosyl compounds GO:0004564|beta-fructofuranosidase activity
AT3G14050	174	106	260	669	502	1189	121	69	108	411	502	413	1.13562e-05	0.00202419	protein_coding RSH2 (RELA-SPOT HOMOLOG 2); GTP diphosphokinase RELA-SPOT HOMOLOG 2 (RSH2); FUNCTIONS IN: GTP diphosphokinase activity; INVOLVED IN: response to abscisic acid stimulus, response to wounding; LOCATED IN: chloroplast; EXPRESSED IN: 23 plant structures; EXPRESSED DURING: 13 growth stages; CONTAINS InterPro DOMAIN/s: Metal-dependent phosphohydrolase, HD region, subdomain (InterPro:IPR0…	GO:0015969|guanosine tetraphosphate metabolic process GO:0003824|catalytic activity GO:0009507|chloroplast
AT3G14060	74	81	104	258	220	712	48	60	45	161	220	264	0.000189072	0.0182074	protein_coding unknown protein unknown protein; FUNCTIONS IN: molecular_function unknown; INVOLVED IN: biological_process unknown; LOCATED IN: cell wall, cytoplasm; EXPRESSED IN: 13 plant structures; EXPRESSED DURING: 7 growth stages; BEST Arabidopsis thaliana protein match is: unknown protein (TAIR:AT1G54120.1); Has 16 Blast hits to 16 proteins in 4 species: Archae - 0; Bacteria - 0; Metazoa - 0…	GO:0003674|molecular_function GO:0005618|cell wall GO:0008150|biological_process GO:0005737|cytoplasm
AT3G14210	1283	1477	5121	635	217	681	906	1026	1971	372	217	254	6.13856e-08	2.44717e-05	protein_coding ESM1 (epithiospecifier modifier 1); carboxylesterase/ hydrolase, acting on ester bonds A semidominant QTL which has an epistatic effect on the Epithiospecifier gene. Represses nitrile formation and favors isothiocyanate production during glucosinolate hydrolysis. The functional allele deters the insect herbivory T. ni. epithiospecifier modifier 1 (ESM1); FUNCTIONS IN: hydrolase act…	GO:0004091|carboxylesterase activity GO:0009409|response to cold GO:0019762|glucosinolate catabolic process GO:0009625|response to insect
AT3G15356	116	103	356	850	260	1425	80	76	148	492	260	533	2.29168e-05	0.00363095	protein_coding legume lectin family protein legume lectin family protein; FUNCTIONS IN: carbohydrate binding, sugar binding; INVOLVED IN: biological_process unknown; LOCATED IN: apoplast, cell wall; EXPRESSED IN: 7 plant structures; CONTAINS InterPro DOMAIN/s: Legume lectin, beta domain (InterPro:IPR001220), Concanavalin A-like lectin/glucanase, subgroup (InterPro:IPR013320), Concanavalin A-like …	GO:0012505|endomembrane system GO:0030246|carbohydrate binding GO:0008150|biological_process
AT3G16530	158	184	253	773	543	929	107	128	103	450	543	322	5.42274e-05	0.00723195	protein_coding legume lectin family protein Lectin like protein whose expression is induced upon treatment with chitin oligomers. legume lectin family protein; FUNCTIONS IN: carbohydrate binding, sugar binding; INVOLVED IN: response to chitin; LOCATED IN: apoplast, cell wall, nucleus, plant-type cell wall; EXPRESSED IN: 16 plant structures; EXPRESSED DURING: 9 growth stages; CONTAINS InterPro DOM…	GO:0012505|endomembrane system GO:0030246|carbohydrate binding GO:0010200|response to chitin
AT3G17170	551	898	574	227	135	249	378	597	209	129	135	96	0.000424349	0.033788	protein_coding RFC3 (REGULATOR OF FATTY-ACID COMPOSITION 3); structural constituent of ribosome REGULATOR OF FATTY-ACID COMPOSITION 3 (RFC3); FUNCTIONS IN: structural constituent of ribosome; INVOLVED IN: translation, ribosome biogenesis; LOCATED IN: ribosome, intracellular, chloroplast; EXPRESSED IN: 21 plant structures; EXPRESSED DURING: 13 growth stages; CONTAINS InterPro DOMAIN/s: Translation…	GO:0005840|ribosome GO:0042254|ribosome biogenesis GO:0006412|translation GO:0003735|structural constituent of ribosome
AT3G18050	1045	1085	2155	474	238	610	719	763	816	277	238	213	0.000126529	0.013559	protein_coding unknown protein unknown protein; FUNCTIONS IN: molecular_function unknown; INVOLVED IN: biological_process unknown; LOCATED IN: anchored to membrane; EXPRESSED IN: 21 plant structures; EXPRESSED DURING: 13 growth stages; BEST Arabidopsis thaliana protein match is: unknown protein (TAIR:AT4G28100.1); Has 35 Blast hits to 35 proteins in 7 species: Archae - 0; Bacteria - 0; Metazoa - …	GO:0003674|molecular_function GO:0031225|anchored to membrane GO:0008150|biological_process
AT3G18250	43	25	40	363	166	639	34	20	15	220	166	228	1.66341e-07	5.71027e-05	protein_coding unknown protein unknown protein; FUNCTIONS IN: molecular_function unknown; INVOLVED IN: biological_process unknown; LOCATED IN: cellular_component unknown; EXPRESSED IN: 8 plant structures; EXPRESSED DURING: LP.06 six leaves visible, 4 anthesis, LP.04 four leaves visible, LP.02 two leaves visible, petal differentiation and expansion stage; Has 20 Blast hits to 20 proteins in 7 spec…	GO:0003674|molecular_function GO:0005575|cellular_component GO:0008150|biological_process
AT3G18830	362	242	758	1067	457	3221	249	172	309	624	457	1201	0.000145113	0.0148606	protein_coding ATPLT5 (POLYOL TRANSPORTER 5); D-ribose transmembrane transporter/ D-xylose transmembrane transporter/ carbohydrate transmembrane transporter/ galactose transmembrane transporter/ glucose transmembrane transporter/ glycerol transmembrane transporter/ mann This gene encodes a plasma membrane-localized polyol/cyclitol/monosaccharide-H+-symporter. The AtPLT5 symporter is able to catal…	GO:0016020|membrane GO:0006810|transport GO:0015148|D-xylose transmembrane transporter activity GO:0015168|glycerol transmembrane transporter activity GO:0005355|glucose transmembrane transporter activity GO:0015144|carbohydrate transmembrane transporter activity GO:0005351|sugar:hydrogen symporter activity GO:0005365|myo-inositol transmembrane transporter activity GO:0008643|carbohydrate transpo…
AT3G19010	295	132	491	1008	567	1850	204	91	205	579	567	669	4.54877e-05	0.00621104	protein_coding oxidoreductase, 2OG-Fe(II) oxygenase family protein oxidoreductase, 2OG-Fe(II) oxygenase family protein; FUNCTIONS IN: flavonol synthase activity, oxidoreductase activity, iron ion binding; INVOLVED IN: flavonoid biosynthetic process; LOCATED IN: cellular_component unknown; EXPRESSED IN: 24 plant structures; EXPRESSED DURING: 15 growth stages; CONTAINS InterPro DOMAIN/s: Isopenicil…	GO:0005575|cellular_component GO:0009813|flavonoid biosynthetic process GO:0045431|flavonol synthase activity
AT3G20820	212	234	340	47	38	78	147	146	140	27	38	26	0.000205134	0.019352	protein_coding leucine-rich repeat family protein leucine-rich repeat family protein; FUNCTIONS IN: protein binding; INVOLVED IN: signal transduction, defense response; LOCATED IN: apoplast, cell wall, chloroplast, membrane; EXPRESSED IN: 23 plant structures; EXPRESSED DURING: 13 growth stages; CONTAINS InterPro DOMAIN/s: Leucine-rich repeat, N-terminal (InterPro:IPR013210), Leucine-rich repeat (…	GO:0012505|endomembrane system GO:0007165|signal transduction GO:0005515|protein binding GO:0006952|defense response
AT3G21055	101	73	2103	59	13	533	64	49	830	39	13	205	0.000252248	0.0229218	protein_coding PSBTN (photosystem II subunit T) Encodes photosystem II 5 kD protein subunit PSII-T. This is a nuclear-encoded gene (PsbTn) which also has a plastid-encoded paralog (PsbTc). photosystem II subunit T (PSBTN); FUNCTIONS IN: molecular_function unknown; INVOLVED IN: biological_process unknown; LOCATED IN: chloroplast photosystem II, chloroplast thylakoid lumen, chloroplast; EXPRESSED I…	GO:0003674|molecular_function GO:0030095|chloroplast photosystem II GO:0009543|chloroplast thylakoid lumen GO:0008150|biological_process
AT3G21230	74	38	135	685	498	1129	51	26	55	411	498	386	4.79176e-10	3.1724e-07	protein_coding 4CL5 (4-coumarate:CoA ligase 5); 4-coumarate-CoA ligase The gene encodes a 4-coumarate coenzyme A ligase being able to use sinapate as substrate. The catalytic efficiency was in the following (descending) order: p-coumaric acid, caffeic acid, 5-OH-ferulic acid, ferulic acid and sinapic acid. At4CL5 was unable to use cinnamic acid as substrate. Knockout of At4CL5 (4cl5) revealed no …	GO:0005575|cellular_component GO:0016207|4-coumarate-CoA ligase activity GO:0009699|phenylpropanoid biosynthetic process
AT3G21520	2	0	6	23	46	30	2	0	4	13	46	13	0.000391007	0.0317212	protein_coding unknown protein unknown protein; FUNCTIONS IN: molecular_function unknown; INVOLVED IN: biological_process unknown; LOCATED IN: cellular_component unknown; EXPRESSED IN: 6 plant structures; EXPRESSED DURING: LP.06 six leaves visible, 4 anthesis; CONTAINS InterPro DOMAIN/s: Protein of unknown function DUF679 (InterPro:IPR007770); BEST Arabidopsis thaliana protein match is: unknown p…	GO:0003674|molecular_function GO:0005575|cellular_component GO:0008150|biological_process
AT3G22060	430	313	640	3408	1569	7555	285	216	247	1952	1569	2755	9.35398e-15	1.65142e-11	protein_coding receptor protein kinase-related contains Pfam profile: PF01657 Domain of unknown function that is usually associated with protein kinase domain Pfam:PF00069, however this protein does not have the protein kinase domain receptor protein kinase-related; FUNCTIONS IN: molecular_function unknown; INVOLVED IN: response to abscisic acid stimulus; LOCATED IN: cell wall, vacuole; EXPRESSED…	GO:0003674|molecular_function GO:0012505|endomembrane system GO:0009737|response to abscisic acid stimulus
AT3G22120	3298	6993	6819	2619	1084	3245	2287	4877	2634	1511	1084	1242	4.77605e-05	0.00643898	protein_coding CWLP (CELL WALL-PLASMA MEMBRANE LINKER PROTEIN); lipid binding cell wall-plasma membrane linker protein homolog (CWLP) CELL WALL-PLASMA MEMBRANE LINKER PROTEIN (CWLP); FUNCTIONS IN: lipid binding; INVOLVED IN: lipid transport; LOCATED IN: endomembrane system; EXPRESSED IN: 22 plant structures; EXPRESSED DURING: 13 growth stages; CONTAINS InterPro DOMAIN/s: Bifunctional inhibitor/pl…	GO:0008289|lipid binding GO:0012505|endomembrane system GO:0006869|lipid transport
AT3G22142	1880	3804	3223	1262	407	743	1311	2635	1277	734	407	264	6.84234e-07	0.000196986	protein_coding structural constituent of cell wall Encodes a Protease inhibitor/seed storage/LTP family protein structural constituent of cell wall; FUNCTIONS IN: structural constituent of cell wall; INVOLVED IN: lipid transport; LOCATED IN: cellular_component unknown; CONTAINS InterPro DOMAIN/s: Bifunctional inhibitor/plant lipid transfer protein/seed storage (InterPro:IPR016140), Plant lipid tr…	GO:0005575|cellular_component GO:0005199|structural constituent of cell wall GO:0006869|lipid transport
AT3G22160	154	128	357	475	418	1236	103	87	140	264	418	454	0.000296647	0.0258781	protein_coding VQ motif-containing protein VQ motif-containing protein; FUNCTIONS IN: molecular_function unknown; INVOLVED IN: biological_process unknown; LOCATED IN: chloroplast; EXPRESSED IN: stem, inflorescence meristem, sepal, stamen, leaf; EXPRESSED DURING: LP.06 six leaves visible, 4 anthesis, LP.04 four leaves visible; CONTAINS InterPro DOMAIN/s: VQ (InterPro:IPR008889); BEST Arabidopsis t…	GO:0003674|molecular_function GO:0008150|biological_process GO:0009507|chloroplast
AT3G23250	149	71	116	379	489	779	101	50	57	228	489	293	1.12499e-05	0.00201493	protein_coding MYB15 (MYB DOMAIN PROTEIN 15); DNA binding / transcription factor Member of the R2R3 factor gene family. MYB DOMAIN PROTEIN 15 (MYB15); FUNCTIONS IN: transcription factor activity, DNA binding; INVOLVED IN: in 7 processes; EXPRESSED IN: 10 plant structures; EXPRESSED DURING: 6 growth stages; CONTAINS InterPro DOMAIN/s: SANT, DNA-binding (InterPro:IPR001005), Homeodomain-like (Inter…	GO:0009733|response to auxin stimulus GO:0003677|DNA binding GO:0006355|regulation of transcription DNA-dependent GO:0009753|response to jasmonic acid stimulus GO:0009723|response to ethylene stimulus GO:0046686|response to cadmium ion GO:0009651|response to salt stress GO:0003700|transcription factor activity
AT3G23450	34797	62199	28481	32163	9116	30620	24204	43883	10980	18820	9116	10902	9.09495e-06	0.00170301	protein_coding unknown protein unknown protein; FUNCTIONS IN: molecular_function unknown; INVOLVED IN: biological_process unknown; LOCATED IN: endomembrane system; EXPRESSED IN: 14 plant structures; EXPRESSED DURING: 8 growth stages.	none
AT3G23550	64	33	52	453	125	404	43	24	19	271	125	134	1.14659e-05	0.00203396	protein_coding MATE efflux family protein MATE efflux family protein; FUNCTIONS IN: antiporter activity, drug transporter activity, transporter activity; INVOLVED IN: multidrug transport; LOCATED IN: membrane; EXPRESSED IN: 10 plant structures; EXPRESSED DURING: 6 growth stages; CONTAINS InterPro DOMAIN/s: Multi antimicrobial extrusion protein MatE (InterPro:IPR002528); BEST Arabidopsis thaliana …	GO:0016020|membrane GO:0015297|antiporter activity GO:0005215|transporter activity GO:0006855|multidrug transport
AT3G25760	1614	1205	3900	5846	3330	5001	1117	844	1543	3375	3330	1793	0.000164118	0.0164007	protein_coding AOC1 (ALLENE OXIDE CYCLASE 1); allene-oxide cyclase encodes allene oxide cyclase. One of four genes in Arabidopsis that encode this enzyme, which catalyzes an essential step in jasmonic acid biosynthesis. Gene expression is induced during senescence, a process that involves jasmonic acid signalling pathway. ALLENE OXIDE CYCLASE 1 (AOC1); FUNCTIONS IN: allene-oxide cyclase activity;…	GO:0009535|chloroplast thylakoid membrane GO:0009695|jasmonic acid biosynthetic process GO:0046423|allene-oxide cyclase activity GO:0009269|response to desiccation
AT3G25780	254	107	243	730	447	717	167	80	102	396	447	263	0.000712415	0.0497416	protein_coding AOC3 (ALLENE OXIDE CYCLASE 3); allene-oxide cyclase Encodes allene oxide cyclase, one of the enzymes involved in jasmonic acid biosynthesis. One of four genes in Arabidopsis that encode this enzyme. mRNA expression is upregulated in senescing leaves. Note: Nomenclature for Arabidopsis allene oxide cyclase 3 (AOC3, AT3G25780) gene is based on Stenzel et al. 2003 Plant Molecular Biol…	GO:0009695|jasmonic acid biosynthetic process GO:0005886|plasma membrane GO:0046423|allene-oxide cyclase activity
AT3G26210	187	75	150	651	376	711	127	54	71	378	376	266	7.59038e-05	0.00934927	protein_coding CYP71B23; electron carrier/ heme binding / iron ion binding / monooxygenase/ oxygen binding putative cytochrome P450 CYP71B23; FUNCTIONS IN: electron carrier activity, monooxygenase activity, iron ion binding, oxygen binding, heme binding; LOCATED IN: endomembrane system; EXPRESSED IN: 20 plant structures; EXPRESSED DURING: 11 growth stages; CONTAINS InterPro DOMAIN/s: Cytochrome P…	GO:0012505|endomembrane system GO:0019825|oxygen binding
AT3G26500	93	42	291	634	252	2304	61	26	106	365	252	844	7.71212e-09	4.20481e-06	protein_coding leucine-rich repeat family protein leucine-rich repeat family protein; FUNCTIONS IN: protein binding; INVOLVED IN: biological_process unknown; LOCATED IN: cellular_component unknown; CONTAINS InterPro DOMAIN/s: Leucine-rich repeat, typical subtype (InterPro:IPR003591), Leucine-rich repeat (InterPro:IPR001611); BEST Arabidopsis thaliana protein match is: leucine-rich repeat family p…	GO:0005575|cellular_component GO:0005515|protein binding GO:0008150|biological_process
AT3G26520	4183	3282	13014	2031	968	6527	2915	2345	5071	1195	968	2430	0.000337105	0.0283406	protein_coding TIP2 (TONOPLAST INTRINSIC PROTEIN 2); water channel gamma tonoplast intrinsic protein 2 (TIP2). expressed throughout the plant and transcript level is increased upon NaCl or ABA treatments. NaCl stress-sensitive yeast mutant strains exhibit more resistance to salt when expressing this protein. TONOPLAST INTRINSIC PROTEIN 2 (TIP2); FUNCTIONS IN: water channel activity; INVOLVED IN: …	GO:0006810|transport GO:0015250|water channel activity GO:0016020|membrane GO:0030104|water homeostasis GO:0009651|response to salt stress
AT3G26740	23308	26218	18361	14143	8125	12978	16248	18341	7152	8315	8125	4737	0.000131721	0.0140736	protein_coding CCL (CCR-LIKE) transcripts are differentially regulated at the level of mRNA stability at different times of day controlled by the circadian clock. mRNAs are targets of the mRNA degradation pathway mediated by the downstream (DST) instability determinant. CCR-LIKE (CCL); FUNCTIONS IN: molecular_function unknown; INVOLVED IN: biological_process unknown; LOCATED IN: chloroplast; EXPR…	GO:0003674|molecular_function GO:0008150|biological_process GO:0009507|chloroplast
AT3G26830	29	29	41	390	66	323	18	20	12	241	66	112	2.00804e-06	0.000474193	protein_coding PAD3 (PHYTOALEXIN DEFICIENT 3); dihydrocamalexic acid decarboxylase/ monooxygenase/ oxygen binding Mutations in pad3 are defective in biosynthesis of the indole derived phytoalexin camalexin. Encodes a cytochrome P450 enzyme that catalyzes the conversion of dihydrocamalexic acid to camalexin. PHYTOALEXIN DEFICIENT 3 (PAD3); FUNCTIONS IN: dihydrocamalexic acid decarboxylase activity…	GO:0010120|camalexin biosynthetic process GO:0005792|microsome GO:0005783|endoplasmic reticulum GO:0009700|indole phytoalexin biosynthetic process GO:0019825|oxygen binding GO:0010298|dihydrocamalexic acid decarboxylase activity GO:0009737|response to abscisic acid stimulus GO:0004497|monooxygenase activity GO:0009617|response to bacterium
AT3G27690	3450	1713	2723	786	292	744	2444	1211	1060	468	292	259	2.2759e-08	1.05474e-05	protein_coding LHCB2.3; chlorophyll binding Encodes Lhcb2.4. Belongs to the Lhc super-gene family encodes the light-harvesting chlorophyll a/b-binding (LHC) proteins that constitute the antenna system of the photosynthetic apparatus. LHCB2.3; FUNCTIONS IN: chlorophyll binding; INVOLVED IN: response to blue light, response to red light, response to far red light, photosynthesis; LOCATED IN: light-…	GO:0009535|chloroplast thylakoid membrane GO:0030076|light-harvesting complex GO:0016168|chlorophyll binding GO:0015979|photosynthesis
AT3G43270	441	415	1006	1415	904	4355	300	290	381	851	904	1587	1.28882e-05	0.00222247	protein_coding pectinesterase family protein pectinesterase family protein; FUNCTIONS IN: enzyme inhibitor activity, pectinesterase activity; INVOLVED IN: cell wall modification; LOCATED IN: plant-type cell wall; EXPRESSED IN: 21 plant structures; EXPRESSED DURING: 10 growth stages; CONTAINS InterPro DOMAIN/s: Pectinesterase, active site (InterPro:IPR018040), Pectin lyase fold/virulence factor (I…	GO:0009505|plant-type cell wall GO:0030599|pectinesterase activity GO:0042545|cell wall modification
AT3G44860	640	348	847	4510	1835	3694	458	259	332	2634	1835	1378	1.55333e-10	1.1518e-07	protein_coding FAMT (farnesoic acid carboxyl-O-methyltransferase); S-adenosylmethionine-dependent methyltransferase/ farnesoic acid O-methyltransferase Encodes a farnesoic acid carboxyl-O-methyltransferase. farnesoic acid carboxyl-O-methyltransferase (FAMT); FUNCTIONS IN: S-adenosylmethionine-dependent methyltransferase activity, farnesoic acid O-methyltransferase activity; INVOLVED IN: biologica…	GO:0005575|cellular_component GO:0008757|S-adenosylmethionine-dependent methyltransferase activity GO:0019010|farnesoic acid O-methyltransferase activity GO:0008150|biological_process
AT3G45060	87	95	181	1009	624	1809	63	71	66	588	624	664	5.73358e-11	4.72383e-08	protein_coding ATNRT2.6; nitrate transmembrane transporter member of High affinity nitrate transporter family ATNRT2.6; FUNCTIONS IN: nitrate transmembrane transporter activity; LOCATED IN: plasma membrane, chloroplast; EXPRESSED IN: sepal, flower, root; EXPRESSED DURING: petal differentiation and expansion stage; CONTAINS InterPro DOMAIN/s: Major facilitator superfamily MFS-1 (InterPro:IPR011701…	GO:0015112|nitrate transmembrane transporter activity GO:0006810|transport GO:0016021|integral to membrane
AT3G45290	6	9	20	117	32	189	4	7	10	65	32	73	0.000103324	0.0116806	protein_coding MLO3 (MILDEW RESISTANCE LOCUS O 3); calmodulin binding A member of a large family of seven-transmembrane domain proteins specific to plants, homologs of the barley mildew resistance locus o (MLO) protein. The Arabidopsis genome contains 15 genes encoding MLO proteins, with localization in plasma membrane. Phylogenetic analysis revealed four clades of closely-related AtMLO genes. AT…	GO:0006952|defense response GO:0008219|cell death GO:0005516|calmodulin binding GO:0005886|plasma membrane
AT3G46280	78	57	76	1720	934	4454	49	36	33	1009	934	1614	6.99309e-24	3.70384e-20	protein_coding protein kinase-related protein kinase-related; FUNCTIONS IN: molecular_function unknown; INVOLVED IN: biological_process unknown; LOCATED IN: endomembrane system; EXPRESSED IN: 6 plant structures; EXPRESSED DURING: 4 anthesis, petal differentiation and expansion stage; BEST Arabidopsis thaliana protein match is: receptor protein kinase-related (TAIR:AT3G46270.1); Has 428 Blast hits…	GO:0003674|molecular_function GO:0012505|endomembrane system GO:0008150|biological_process
AT3G46690	12	14	3	114	71	120	8	10	0	68	71	41	2.39643e-05	0.00378075	protein_coding UDP-glucoronosyl/UDP-glucosyl transferase family protein UDP-glucoronosyl/UDP-glucosyl transferase family protein; FUNCTIONS IN: UDP-glycosyltransferase activity, transferase activity, transferring glycosyl groups; INVOLVED IN: metabolic process; EXPRESSED IN: root; CONTAINS InterPro DOMAIN/s: UDP-glucuronosyl/UDP-glucosyltransferase (InterPro:IPR002213); BEST Arabidopsis thaliana …	GO:0008194|UDP-glycosyltransferase activity GO:0008152|metabolic process GO:0016757|transferase activity transferring glycosyl groups
AT3G47380	155	134	258	397	480	980	109	97	99	235	480	371	0.000236505	0.021704	protein_coding invertase/pectin methylesterase inhibitor family protein invertase/pectin methylesterase inhibitor family protein; FUNCTIONS IN: enzyme inhibitor activity, pectinesterase inhibitor activity, pectinesterase activity; INVOLVED IN: biological_process unknown; LOCATED IN: endomembrane system; EXPRESSED IN: 14 plant structures; EXPRESSED DURING: 9 growth stages; CONTAINS InterPro DOMAIN…	GO:0012505|endomembrane system GO:0046910|pectinesterase inhibitor activity GO:0008150|biological_process
AT3G48360	518	270	503	908	1303	4245	366	186	186	548	1303	1457	2.37865e-07	7.90243e-05	protein_coding BT2 (BTB AND TAZ DOMAIN PROTEIN 2); protein binding / transcription factor/ transcription regulator encodes a protein (BT2) that is an essential component of the TAC1-mediated telomerase activation pathway. Acts redundantly with BT3 and BT1 during female gametophyte development and with BT3 during male gametophyte development. BTB AND TAZ DOMAIN PROTEIN 2 (BT2); FUNCTIONS IN: prote…	GO:0005634|nucleus GO:0005515|protein binding GO:0030528|transcription regulator activity GO:0051973|positive regulation of telomerase activity GO:0003700|transcription factor activity
AT3G49620	20	56	45	218	152	231	14	41	14	127	152	75	0.000203023	0.0192508	protein_coding DIN11 (DARK INDUCIBLE 11); iron ion binding / oxidoreductase encodes a protein similar to 2-oxoacid-dependent dioxygenase. Expression is induced after 24 hours of dark treatment, in senescing leaves and treatment with exogenous photosynthesis inhibitor. Induction of gene expression was suppressed in excised leaves supplied with sugar. The authors suggest that the gene's expression …	GO:0009744|response to sucrose stimulus GO:0009267|cellular response to starvation GO:0009416|response to light stimulus GO:0007568|aging GO:0016491|oxidoreductase activity
AT3G49780	355	206	420	1124	591	2189	233	150	167	669	591	792	2.19692e-05	0.00351284	protein_coding ATPSK4 (PHYTOSULFOKINE 4 PRECURSOR); growth factor Phytosulfokine 3 precursor, coding for a unique plant peptide growth factor. Plants overexpressing this gene (under a 35S promoter), develop normal cotyledons and hypocotyls but their growth, in particular that of their roots, was faster than that of wildtype. PHYTOSULFOKINE 4 PRECURSOR (ATPSK4); FUNCTIONS IN: growth factor activit…	GO:0031012|extracellular matrix GO:0009887|organ morphogenesis GO:0008083|growth factor activity GO:0030154|cell differentiation GO:0008283|cell proliferation
AT3G50480	996	408	706	3228	1328	3043	689	277	272	1904	1328	1126	3.52769e-06	0.000744309	protein_coding HR4 (HOMOLOG OF RPW8 4) Homolog of RPW8 HOMOLOG OF RPW8 4 (HR4); FUNCTIONS IN: molecular_function unknown; INVOLVED IN: response to other organism; LOCATED IN: endomembrane system; EXPRESSED IN: 20 plant structures; EXPRESSED DURING: 11 growth stages; CONTAINS InterPro DOMAIN/s: Disease resistance, plant (InterPro:IPR014011), Mildew-resistance, broad-spectrum (InterPro:IPR008808); …	GO:0003674|molecular_function GO:0012505|endomembrane system GO:0051707|response to other organism
AT3G50740	62	74	156	457	145	616	41	53	68	254	145	235	0.000380306	0.0310434	protein_coding UGT72E1 (UDP-glucosyl transferase 72E1); UDP-glycosyltransferase/ coniferyl-alcohol glucosyltransferase/ transferase, transferring glycosyl groups UGT72E1 is an UDPG:coniferyl alcohol glucosyltransferase which specifically glucosylates sinapyl- and coniferyl aldehydes. The enzyme is thought to be involved in lignin metabolism. UDP-glucosyl transferase 72E1 (UGT72E1); FUNCTIONS IN: …	GO:0008194|UDP-glycosyltransferase activity GO:0016757|transferase activity transferring glycosyl groups GO:0047209|coniferyl-alcohol glucosyltransferase activity GO:0009808|lignin metabolic process
AT3G51330	261	112	538	1435	738	2726	175	80	202	836	738	1004	2.18259e-08	1.0243e-05	protein_coding aspartyl protease family protein aspartyl protease family protein; FUNCTIONS IN: aspartic-type endopeptidase activity; INVOLVED IN: proteolysis; LOCATED IN: anchored to membrane; EXPRESSED IN: 7 plant structures; EXPRESSED DURING: LP.06 six leaves visible, LP.04 four leaves visible, LP.10 ten leaves visible, 4 leaf senescence stage, LP.08 eight leaves visible; CONTAINS InterPro DOM…	GO:0006508|proteolysis GO:0031225|anchored to membrane
AT3G51340	29	33	110	172	66	588	18	26	47	100	66	238	0.000424685	0.033788	protein_coding aspartic-type endopeptidase aspartic-type endopeptidase; FUNCTIONS IN: aspartic-type endopeptidase activity; INVOLVED IN: proteolysis; LOCATED IN: endomembrane system; CONTAINS InterPro DOMAIN/s: Peptidase aspartic, catalytic (InterPro:IPR009007), Peptidase A1 (InterPro:IPR001461), Peptidase aspartic, active site (InterPro:IPR001969); BEST Arabidopsis thaliana protein match is: asp…	GO:0012505|endomembrane system GO:0006508|proteolysis
AT3G51440	210	162	257	775	436	1033	149	113	99	447	436	397	0.000160769	0.0161095	protein_coding strictosidine synthase family protein strictosidine synthase family protein; FUNCTIONS IN: strictosidine synthase activity; INVOLVED IN: alkaloid biosynthetic process, biosynthetic process; LOCATED IN: endoplasmic reticulum; EXPRESSED IN: 19 plant structures; EXPRESSED DURING: 10 growth stages; CONTAINS InterPro DOMAIN/s: Strictosidine synthase, conserved region (InterPro:IPR018119…	GO:0016844|strictosidine synthase activity GO:0005783|endoplasmic reticulum GO:0009821|alkaloid biosynthetic process
AT3G51450	585	557	2083	3390	1899	6915	407	384	782	1933	1899	2530	5.8055e-08	2.36526e-05	protein_coding strictosidine synthase family protein strictosidine synthase family protein; FUNCTIONS IN: strictosidine synthase activity; INVOLVED IN: alkaloid biosynthetic process, biosynthetic process; LOCATED IN: endomembrane system; EXPRESSED IN: 22 plant structures; EXPRESSED DURING: 13 growth stages; CONTAINS InterPro DOMAIN/s: Strictosidine synthase, conserved region (InterPro:IPR018119),…	GO:0016844|strictosidine synthase activity GO:0012505|endomembrane system GO:0009821|alkaloid biosynthetic process
AT3G52190	75	46	142	251	186	687	54	29	45	139	186	258	0.000126538	0.013559	protein_coding PHF1 (PHOSPHATE TRANSPORTER TRAFFIC FACILITATOR1); nucleotide binding Encodes a plant specific protein structurally related to the SEC12 proteins of the early secretory pathway. Mutation of PHF1 impairs Pi transport. Expression was detected in all tissues, and was induced by Pi starvation. Localized in endoplasmic reticulum (ER), and mutation of PHF1 resulted in ER retention and re…	GO:0006817|phosphate transport GO:0016036|cellular response to phosphate starvation GO:0005783|endoplasmic reticulum GO:0000166|nucleotide binding GO:0006888|ER to Golgi vesicle-mediated transport
AT3G52450	33	37	22	280	196	435	23	24	9	166	196	161	2.45765e-07	8.06347e-05	protein_coding PUB22 (PLANT U-BOX 22); ubiquitin-protein ligase Encodes a cytoplasmically localized U-box domain E3 ubiquitin ligase protein that is involved in the response to water stress and acts as a negative regulator of PAMP-triggered immunity. PLANT U-BOX 22 (PUB22); FUNCTIONS IN: ubiquitin-protein ligase activity; INVOLVED IN: in 6 processes; LOCATED IN: cytosol; EXPRESSED IN: 11 plant st…	none
AT3G53180	258	239	538	847	576	1857	163	164	222	506	576	696	0.000183672	0.017912	protein_coding catalytic/ glutamate-ammonia ligase catalytic/ glutamate-ammonia ligase; FUNCTIONS IN: glutamate-ammonia ligase activity, catalytic activity; INVOLVED IN: nitrogen compound metabolic process, N-terminal protein myristoylation, nitrogen fixation, metabolic process, glutamine biosynthetic process; EXPRESSED IN: 23 plant structures; EXPRESSED DURING: 13 growth stages; CONTAINS InterPr…	GO:0009399|nitrogen fixation GO:0004356|glutamate-ammonia ligase activity GO:0006499|N-terminal protein myristoylation
AT3G53260	120	91	450	555	358	986	82	62	161	313	358	338	0.000579643	0.0424709	protein_coding PAL2; phenylalanine ammonia-lyase Encodes phenylalanine lyase. PAL2; FUNCTIONS IN: phenylalanine ammonia-lyase activity; INVOLVED IN: response to oxidative stress, phenylpropanoid biosynthetic process, response to wounding, defense response; LOCATED IN: cytoplasm; EXPRESSED IN: 22 plant structures; EXPRESSED DURING: 13 growth stages; CONTAINS InterPro DOMAIN/s: Phenylalanine/histid…	GO:0009611|response to wounding GO:0006979|response to oxidative stress GO:0045548|phenylalanine ammonia-lyase activity GO:0009699|phenylpropanoid biosynthetic process GO:0006952|defense response GO:0005737|cytoplasm
AT3G54420	82	64	90	283	230	577	61	44	25	159	230	204	0.000118826	0.0129926	protein_coding ATEP3; chitinase encodes an EP3 chitinase that is expressed during somatic embryogenesis in 'nursing' cells surrounding the embryos but not in embryos themselves. The gene is also expressed in mature pollen and growing pollen tubes until they enter the receptive synergid, but not in endosperm and integuments as in carrot. Post-embryonically, expression is found in hydathodes, stipu…	GO:0012505|endomembrane system GO:0009626|plant-type hypersensitive response GO:0004568|chitinase activity GO:0010262|somatic embryogenesis
AT3G54640	368	323	528	1977	753	1231	253	241	212	1139	753	469	5.71317e-05	0.00748466	protein_coding TSA1 (TRYPTOPHAN SYNTHASE ALPHA CHAIN); tryptophan synthase Catalyzes the conversion of indole-3-glycerolphosphate to indole, the penultimate reaction in the biosynthesis of tryptophan. Functions as a heterocomplex with tryptophan synthase beta subunit (TSA2). TRYPTOPHAN SYNTHASE ALPHA CHAIN (TSA1); FUNCTIONS IN: tryptophan synthase activity; INVOLVED IN: tryptophan biosynthetic pr…	GO:0000162|tryptophan biosynthetic process GO:0004834|tryptophan synthase activity GO:0009507|chloroplast
AT3G54890	8931	6586	16304	5172	1876	7416	6255	4645	6294	3026	1876	2729	9.25382e-05	0.0107888	protein_coding LHCA1; chlorophyll binding Encodes a component of the light harvesting complex associated with photosystem I. LHCA1; FUNCTIONS IN: chlorophyll binding; INVOLVED IN: response to blue light, response to red light, response to far red light, photosynthesis, light harvesting in photosystem I, photosynthesis; LOCATED IN: in 7 components; EXPRESSED IN: 29 plant structures; EXPRESSED DURI…	GO:0009768|photosynthesis light harvesting in photosystem I GO:0010287|plastoglobule GO:0009535|chloroplast thylakoid membrane GO:0030076|light-harvesting complex GO:0016168|chlorophyll binding GO:0015979|photosynthesis
AT3G55150	3	8	8	253	193	458	3	3	3	155	193	159	3.28766e-14	4.87561e-11	protein_coding ATEXO70H1 (exocyst subunit EXO70 family protein H1); protein binding A member of EXO70 gene family, putative exocyst subunits, conserved in land plants. Arabidopsis thaliana contains 23 putative EXO70 genes, which can be classified into eight clusters on the phylogenetic tree. exocyst subunit EXO70 family protein H1 (ATEXO70H1); FUNCTIONS IN: protein binding; INVOLVED IN: exocytosi…	GO:0005515|protein binding GO:0000145|exocyst GO:0006904|vesicle docking during exocytosis
AT3G55470	350	434	466	1087	762	1826	229	289	166	627	762	695	0.000248119	0.022602	protein_coding C2 domain-containing protein C2 domain-containing protein; FUNCTIONS IN: molecular_function unknown; INVOLVED IN: biological_process unknown; LOCATED IN: cellular_component unknown; EXPRESSED IN: 22 plant structures; EXPRESSED DURING: 13 growth stages; CONTAINS InterPro DOMAIN/s: C2 membrane targeting protein (InterPro:IPR018029), C2 calcium/lipid-binding region, CaLB (InterPro:IPR…	GO:0003674|molecular_function GO:0005575|cellular_component GO:0008150|biological_process
AT3G55970	2206	1681	3051	5673	4286	8882	1524	1214	1178	3312	4286	3235	8.26931e-06	0.00157571	protein_coding oxidoreductase, 2OG-Fe(II) oxygenase family protein oxidoreductase, 2OG-Fe(II) oxygenase family protein; FUNCTIONS IN: oxidoreductase activity, iron ion binding; LOCATED IN: cellular_component unknown; EXPRESSED IN: 10 plant structures; EXPRESSED DURING: LP.06 six leaves visible, 4 anthesis, LP.04 four leaves visible, C globular stage, petal differentiation and expansion stage; CON…	GO:0005575|cellular_component GO:0005506|iron ion binding GO:0016491|oxidoreductase activity
AT3G56710	107	31	498	607	514	555	80	26	192	370	514	202	0.000187016	0.0181035	protein_coding SIB1 (SIGMA FACTOR BINDING PROTEIN 1); binding / protein binding Sig1 binding protein; interacts with Sig1R4. As well as Sig1, SibI is imported into chloroplasts and its expression is light-dependent in mature chloroplasts. SIGMA FACTOR BINDING PROTEIN 1 (SIB1); FUNCTIONS IN: protein binding, binding; INVOLVED IN: biological_process unknown; LOCATED IN: chloroplast; EXPRESSED IN: 2…	GO:0005515|protein binding GO:0008150|biological_process GO:0005488|binding GO:0009507|chloroplast
AT3G57550	145	86	158	497	231	607	96	55	48	304	231	217	0.000339013	0.0284364	protein_coding AGK2 (GUANYLATE KINASE); guanylate kinase guanylate kinase GUANYLATE KINASE (AGK2); FUNCTIONS IN: guanylate kinase activity; INVOLVED IN: nucleotide metabolic process; LOCATED IN: cellular_component unknown; EXPRESSED IN: 25 plant structures; EXPRESSED DURING: 15 growth stages; CONTAINS InterPro DOMAIN/s: Guanylate kinase (InterPro:IPR008144), Guanylate kinase/L-type calcium channe…	GO:0005575|cellular_component GO:0004385|guanylate kinase activity GO:0009117|nucleotide metabolic process
AT3G59400	2820	3715	1361	1011	543	1109	1966	2686	558	583	543	409	3.23352e-06	0.000696992	protein_coding GUN4; enzyme binding / tetrapyrrole binding GUN, genomes uncoupled, is necessary for coupling the expression of some nuclear genes to the functional state of the chloroplast. Binds to the magnesium chelatase complex and promotes formation of the substrate,a tetrapyrrole signaling molecule. Porphyrin-binding protein that enhances the activity of Mg-chelatase. Although required for c…	GO:0046906|tetrapyrrole binding GO:0010019|chloroplast-nucleus signaling pathway GO:0019899|enzyme binding GO:0043085|positive regulation of catalytic activity GO:0015995|chlorophyll biosynthetic process GO:0009507|chloroplast
AT3G62550	1642	1227	2160	604	390	756	1164	828	818	353	390	271	0.000374318	0.0307032	protein_coding universal stress protein (USP) family protein universal stress protein (USP) family protein; FUNCTIONS IN: molecular_function unknown; INVOLVED IN: response to stress; LOCATED IN: vacuole; EXPRESSED IN: 21 plant structures; EXPRESSED DURING: 13 growth stages; CONTAINS InterPro DOMAIN/s: UspA (InterPro:IPR006016), Rossmann-like alpha/beta/alpha sandwich fold (InterPro:IPR014729), Un…	GO:0003674|molecular_function GO:0006950|response to stress
AT3G63160	13621	18091	15303	8393	2672	5381	9495	12665	5896	4868	2672	1941	3.10726e-08	1.35142e-05	protein_coding unknown protein unknown protein; FUNCTIONS IN: molecular_function unknown; INVOLVED IN: biological_process unknown; LOCATED IN: chloroplast outer membrane, thylakoid, chloroplast thylakoid membrane, chloroplast, chloroplast envelope; EXPRESSED IN: 21 plant structures; EXPRESSED DURING: 13 growth stages; Has 18 Blast hits to 18 proteins in 5 species: Archae - 0; Bacteria - 0; Metazo…	GO:0003674|molecular_function GO:0009535|chloroplast thylakoid membrane GO:0009707|chloroplast outer membrane GO:0008150|biological_process
AT4G01250	37	29	35	267	204	798	29	20	12	154	204	274	2.93652e-08	1.31171e-05	protein_coding WRKY22; transcription factor member of WRKY Transcription Factor; Group II-e WRKY22; FUNCTIONS IN: transcription factor activity; INVOLVED IN: response to chitin, regulation of transcription, DNA-dependent; LOCATED IN: nucleus; EXPRESSED IN: 21 plant structures; EXPRESSED DURING: 13 growth stages; CONTAINS InterPro DOMAIN/s: DNA-binding WRKY (InterPro:IPR003657); BEST Arabidopsis t…	GO:0005634|nucleus GO:0006355|regulation of transcription DNA-dependent GO:0003700|transcription factor activity
AT4G01700	140	106	237	1218	1166	2372	97	72	91	720	1166	825	4.07661e-13	4.72313e-10	protein_coding chitinase, putative chitinase, putative; FUNCTIONS IN: chitinase activity; INVOLVED IN: cell wall macromolecule catabolic process; LOCATED IN: cell wall; EXPRESSED IN: 18 plant structures; EXPRESSED DURING: 13 growth stages; CONTAINS InterPro DOMAIN/s: Glycoside hydrolase, family 19 (InterPro:IPR016283), Glycoside hydrolase, family 19, catalytic (InterPro:IPR000726); BEST Arabidops…	GO:0012505|endomembrane system GO:0016998|cell wall catabolic process GO:0004568|chitinase activity
AT4G01750	28	37	78	337	171	415	19	28	31	194	171	144	7.97767e-06	0.00155429	protein_coding RGXT2 (rhamnogalacturonan xylosyltransferase 2); UDP-xylosyltransferase Encodes a protein with UDP-xylose-dependent xylosyltransferase activity, which transfers Xyl onto L-fucose and (albeit less efficiently) L-arabinose. The linkage to L-fucose was shown to be preferentially to the <i>O</i>-4 position. Analysis of mutant containing T-DNA insertion in this gene indicate that the RG…	GO:0035252|UDP-xylosyltransferase activity GO:0010306|rhamnogalacturonan II biosynthetic process GO:0005794|Golgi apparatus
AT4G02330	295	130	399	952	686	1781	199	95	145	566	686	637	4.6632e-06	0.000944743	protein_coding ATPMEPCRB; pectinesterase ATPMEPCRB; FUNCTIONS IN: pectinesterase activity; INVOLVED IN: response to salt stress; LOCATED IN: endomembrane system, cell wall; EXPRESSED IN: 20 plant structures; EXPRESSED DURING: 13 growth stages; CONTAINS InterPro DOMAIN/s: Pectinesterase, active site (InterPro:IPR018040), Pectin lyase fold/virulence factor (InterPro:IPR011050), Pectinesterase inhib…	GO:0012505|endomembrane system GO:0005618|cell wall GO:0030599|pectinesterase activity
AT4G02380	221	124	86	724	471	439	167	87	34	425	471	157	0.000196244	0.0187037	protein_coding SAG21 (SENESCENCE-ASSOCIATED GENE 21) Encodes AtLEA5 (late embryogenesis abundant like protein). Also known as SENESCENCE-ASSOCIATED GENE 21 (SAG21). Has a role on oxidative stress tolerance. mRNA levels are elevated in response to various stresses. SENESCENCE-ASSOCIATED GENE 21 (SAG21); FUNCTIONS IN: molecular_function unknown; INVOLVED IN: embryonic development, response to react…	GO:0006979|response to oxidative stress GO:0003674|molecular_function GO:0009409|response to cold GO:0009790|embryonic development GO:0042631|cellular response to water deprivation GO:0000302|response to reactive oxygen species
AT4G03460	4	0	1	75	32	99	4	0	0	47	32	36	1.61367e-06	0.000391026	protein_coding ankyrin repeat family protein ankyrin repeat family protein; FUNCTIONS IN: protein binding; INVOLVED IN: biological_process unknown; LOCATED IN: cellular_component unknown; CONTAINS InterPro DOMAIN/s: Ankyrin (InterPro:IPR002110); BEST Arabidopsis thaliana protein match is: ankyrin repeat family protein (TAIR:AT4G03500.1); Has 26211 Blast hits to 12224 proteins in 496 species: Arch…	GO:0005575|cellular_component GO:0005515|protein binding GO:0008150|biological_process
AT4G08030	410	278	25	543	1124	32	274	195	9	304	1124	11	0.000667407	0.0478609	transposable_element_gene transposable element gene gypsy-like retrotransposon family (Athila), has a 1.5e-66 P-value blast match to GB:CAA57397 Athila ORF 1 (Arabidopsis thaliana)	none
AT4G08850	503	274	1480	1428	1014	4125	350	196	594	857	1014	1472	0.000118531	0.0129926	protein_coding kinase kinase; FUNCTIONS IN: kinase activity; INVOLVED IN: protein amino acid phosphorylation; LOCATED IN: plasma membrane, membrane; EXPRESSED IN: 23 plant structures; EXPRESSED DURING: 13 growth stages; CONTAINS InterPro DOMAIN/s: Protein kinase, ATP binding site (InterPro:IPR017441), Protein kinase, core (InterPro:IPR000719), Leucine-rich repeat, N-terminal (InterPro:IPR013210),…	GO:0016301|kinase activity GO:0006468|protein amino acid phosphorylation GO:0005886|plasma membrane
AT4G09000	12	19	4	59	97	8	6	13	0	34	97	1	0.000541781	0.0403344	protein_coding 14-3-3-like protein GF14 chi / general regulatory factor 1 (GRF1) Encodes a 14-3-3 gene, designated GRF1 chi (for general regulatory factor1-G-box factor 14-3-3 homolog isoform chi). The major native forms of 14-3-3s are homo- and hetero-dimers, the biological functions of which are to interact physically with specific client proteins and thereby effect a change in the client. As a…	GO:0005634|nucleus GO:0045309|protein phosphorylated amino acid binding GO:0005515|protein binding
AT4G10340	9344	6807	21217	5643	2284	8932	6532	4799	8176	3366	2284	3234	0.00010733	0.0119857	protein_coding LHCB5 (LIGHT HARVESTING COMPLEX OF PHOTOSYSTEM II 5); chlorophyll binding photosystem II encoding the light-harvesting chlorophyll a/b binding protein CP26 of the antenna system of the photosynthetic apparatus LIGHT HARVESTING COMPLEX OF PHOTOSYSTEM II 5 (LHCB5); FUNCTIONS IN: chlorophyll binding; INVOLVED IN: response to blue light, response to red light, response to far red light…	GO:0010287|plastoglobule GO:0010196|nonphotochemical quenching GO:0009535|chloroplast thylakoid membrane GO:0009517|PSII associated light-harvesting complex II GO:0009533|chloroplast stromal thylakoid GO:0030076|light-harvesting complex GO:0016168|chlorophyll binding GO:0009783|photosystem II antenna complex GO:0015979|photosynthesis
AT4G11170	3	6	2	40	60	71	2	5	1	23	60	23	5.60199e-05	0.00741764	protein_coding disease resistance protein (TIR-NBS-LRR class), putative disease resistance protein (TIR-NBS-LRR class), putative; FUNCTIONS IN: protein binding, transmembrane receptor activity, nucleoside-triphosphatase activity, nucleotide binding, ATP binding; INVOLVED IN: response to ozone, defense response; LOCATED IN: mitochondrion; EXPRESSED IN: stem, root, stamen; EXPRESSED DURING: 4 anthe…	GO:0005515|protein binding GO:0005524|ATP binding GO:0006952|defense response GO:0000166|nucleotide binding GO:0017111|nucleoside-triphosphatase activity GO:0004888|transmembrane receptor activity GO:0005739|mitochondrion
AT4G12470	1343	1485	873	6938	4243	6285	942	1028	321	4043	4243	2214	2.00012e-10	1.45401e-07	protein_coding protease inhibitor/seed storage/lipid transfer protein (LTP) family protein protease inhibitor/seed storage/lipid transfer protein (LTP) family protein; FUNCTIONS IN: lipid binding; INVOLVED IN: defense response to fungus, lipid transport; LOCATED IN: endomembrane system; EXPRESSED IN: 12 plant structures; EXPRESSED DURING: 6 growth stages; CONTAINS InterPro DOMAIN/s: Bifunctional …	GO:0050832|defense response to fungus GO:0008289|lipid binding GO:0012505|endomembrane system GO:0006869|lipid transport
AT4G12480	1018	819	1262	4221	3967	7820	687	596	507	2518	3967	2811	2.48008e-11	2.18926e-08	protein_coding pEARLI 1; lipid binding a putative lipid transfer protein, vernalization-responsive and cold-induced pEARLI 1; FUNCTIONS IN: lipid binding; INVOLVED IN: defense response to fungus, lipid transport; LOCATED IN: endomembrane system; EXPRESSED IN: 6 plant structures; EXPRESSED DURING: LP.06 six leaves visible, 4 anthesis, LP.04 four leaves visible, LP.02 two leaves visible, LP.08 eigh…	GO:0050832|defense response to fungus GO:0008289|lipid binding GO:0012505|endomembrane system GO:0006869|lipid transport
AT4G12490	690	498	702	7451	6403	13157	487	358	278	4368	6403	4773	9.82121e-27	7.28242e-23	protein_coding protease inhibitor/seed storage/lipid transfer protein (LTP) family protein protease inhibitor/seed storage/lipid transfer protein (LTP) family protein; FUNCTIONS IN: lipid binding; INVOLVED IN: defense response to fungus, lipid transport; EXPRESSED IN: 8 plant structures; EXPRESSED DURING: 8 growth stages; CONTAINS InterPro DOMAIN/s: Bifunctional inhibitor/plant lipid transfer pro…	GO:0050832|defense response to fungus GO:0008289|lipid binding GO:0006869|lipid transport
AT4G12500	550	375	701	8553	10177	15862	363	274	278	4947	10177	5653	1.04959e-37	3.89135e-33	protein_coding protease inhibitor/seed storage/lipid transfer protein (LTP) family protein protease inhibitor/seed storage/lipid transfer protein (LTP) family protein; FUNCTIONS IN: lipid binding; INVOLVED IN: lipid transport; EXPRESSED IN: hypocotyl, leaf; EXPRESSED DURING: LP.04 four leaves visible; CONTAINS InterPro DOMAIN/s: Bifunctional inhibitor/plant lipid transfer protein/seed storage (In…	GO:0008289|lipid binding GO:0006869|lipid transport
AT4G14430	42	32	171	189	363	208	28	23	70	113	363	80	0.000134413	0.0142639	protein_coding IBR10 (INDOLE-3-BUTYRIC ACID RESPONSE 10); catalytic/ dodecenoyl-CoA delta-isomerase Encodes a peroxisomal delta3, delta2-enoyl CoA isomerase, involved in unsaturated fatty acid degradation. This enzyme might also be involved in the conversion of indole-3-butyric acid to indole-3-acetic acid via a beta-oxidation-like pathway. INDOLE-3-BUTYRIC ACID RESPONSE 10 (IBR10); FUNCTIONS IN:…	GO:0005575|cellular_component GO:0008152|metabolic process GO:0009062|fatty acid catabolic process GO:0003824|catalytic activity GO:0004165|dodecenoyl-CoA delta-isomerase activity
AT4G14450	10	12	6	64	82	86	8	10	2	43	82	37	0.000122216	0.013249	protein_coding unknown protein unknown protein; LOCATED IN: chloroplast; BEST Arabidopsis thaliana protein match is: unknown protein (TAIR:AT3G23170.1); Has 63 Blast hits to 63 proteins in 4 species: Archae - 0; Bacteria - 0; Metazoa - 0; Fungi - 0; Plants - 63; Viruses - 0; Other Eukaryotes - 0 (source: NCBI BLink).	GO:0009507|chloroplast
AT4G15233	10	7	25	93	59	127	4	2	11	47	59	48	7.87931e-05	0.0095203	protein_coding ATP binding / ATPase/ nucleoside-triphosphatase/ nucleotide binding ATP binding / ATPase/ nucleoside-triphosphatase/ nucleotide binding; FUNCTIONS IN: nucleoside-triphosphatase activity, ATPase activity, nucleotide binding, ATP binding; INVOLVED IN: biological_process unknown; LOCATED IN: membrane; CONTAINS InterPro DOMAIN/s: ATPase, AAA+ type, core (InterPro:IPR003593), ABC transp…	GO:0005524|ATP binding GO:0000166|nucleotide binding GO:0017111|nucleoside-triphosphatase activity GO:0016887|ATPase activity
AT4G15660	191	197	503	764	718	805	126	134	199	448	718	293	0.000367833	0.0303053	protein_coding glutaredoxin family protein glutaredoxin family protein; FUNCTIONS IN: electron carrier activity, arsenate reductase (glutaredoxin) activity, protein disulfide oxidoreductase activity; INVOLVED IN: cell redox homeostasis; LOCATED IN: endomembrane system; EXPRESSED IN: 16 plant structures; EXPRESSED DURING: 10 growth stages; CONTAINS InterPro DOMAIN/s: Glutaredoxin-like, plant II (I…	GO:0012505|endomembrane system GO:0008794|arsenate reductase (glutaredoxin) activity GO:0006118|electron transport
AT4G16260	14	45	84	357	102	334	11	37	38	198	102	102	0.000289529	0.0255035	protein_coding catalytic/ cation binding / hydrolase, hydrolyzing O-glycosyl compounds catalytic/ cation binding / hydrolase, hydrolyzing O-glycosyl compounds; FUNCTIONS IN: cation binding, hydrolase activity, hydrolyzing O-glycosyl compounds, catalytic activity; INVOLVED IN: response to salt stress; LOCATED IN: cell wall, plasma membrane; EXPRESSED IN: 11 plant structures; EXPRESSED DURING: LP.0…	GO:0012505|endomembrane system GO:0004553|hydrolase activity hydrolyzing O-glycosyl compounds GO:0005975|carbohydrate metabolic process
AT4G16563	463	819	259	121	116	131	333	563	86	71	116	45	5.35441e-05	0.0071666	protein_coding aspartyl protease family protein aspartyl protease family protein; FUNCTIONS IN: aspartic-type endopeptidase activity; INVOLVED IN: proteolysis; LOCATED IN: plant-type cell wall; EXPRESSED IN: 19 plant structures; EXPRESSED DURING: 11 growth stages; CONTAINS InterPro DOMAIN/s: Peptidase aspartic, catalytic (InterPro:IPR009007), Peptidase A1 (InterPro:IPR001461), Peptidase aspartic,…	GO:0009505|plant-type cell wall GO:0006508|proteolysis
AT4G16980	3869	4062	12794	1758	1507	5448	2718	2843	4927	1038	1507	1990	0.000208406	0.0194245	protein_coding arabinogalactan-protein family arabinogalactan-protein family; INVOLVED IN: biological_process unknown; LOCATED IN: endomembrane system; EXPRESSED IN: 22 plant structures; EXPRESSED DURING: 13 growth stages; Has 55729 Blast hits to 24766 proteins in 1168 species: Archae - 164; Bacteria - 9443; Metazoa - 21010; Fungi - 5539; Plants - 9700; Viruses - 2314; Other Eukaryotes - 7559 (so…	GO:0012505|endomembrane system GO:0045735|nutrient reservoir activity GO:0008150|biological_process
AT4G18430	1	7	5	52	46	56	1	4	0	27	46	19	2.94263e-05	0.00447033	protein_coding AtRABA1e (Arabidopsis Rab GTPase homolog A1e); GTP binding Arabidopsis Rab GTPase homolog A1e (AtRABA1e); FUNCTIONS IN: GTP binding; INVOLVED IN: protein transport, small GTPase mediated signal transduction; LOCATED IN: plasma membrane; EXPRESSED IN: 23 plant structures; EXPRESSED DURING: 12 growth stages; CONTAINS InterPro DOMAIN/s: Ras GTPase (InterPro:IPR001806), Small GTP-bindi…	GO:0006355|regulation of transcription DNA-dependent GO:0007264|small GTPase mediated signal transduction GO:0005622|intracellular GO:0005525|GTP binding GO:0015031|protein transport
AT4G18540	0	0	1	1	68	38	0	0	0	1	68	14	1.60714e-07	5.56865e-05	protein_coding unknown protein unknown protein; INVOLVED IN: biological_process unknown; EXPRESSED IN: embryo, sepal, pedicel; EXPRESSED DURING: 4 anthesis, C globular stage; Has 134 Blast hits to 131 proteins in 38 species: Archae - 0; Bacteria - 7; Metazoa - 2; Fungi - 107; Plants - 18; Viruses - 0; Other Eukaryotes - 0 (source: NCBI BLink).	GO:0008150|biological_process
AT4G18670	592	1003	552	262	149	238	423	724	202	163	149	80	0.000192445	0.0184842	protein_coding protein binding / structural constituent of cell wall protein binding / structural constituent of cell wall; FUNCTIONS IN: structural constituent of cell wall, protein binding; LOCATED IN: endomembrane system; EXPRESSED IN: 22 plant structures; EXPRESSED DURING: 12 growth stages; CONTAINS InterPro DOMAIN/s: Leucine-rich repeat, N-terminal (InterPro:IPR013210), Atrophin-1 (InterPro:…	GO:0005199|structural constituent of cell wall GO:0012505|endomembrane system GO:0005515|protein binding
AT4G19810	76	56	317	435	314	3136	58	33	111	248	314	1161	4.64012e-10	3.12786e-07	protein_coding glycosyl hydrolase family 18 protein glycosyl hydrolase family 18 protein; FUNCTIONS IN: cation binding, chitinase activity, hydrolase activity, hydrolyzing O-glycosyl compounds, catalytic activity; INVOLVED IN: carbohydrate metabolic process; LOCATED IN: cell wall; EXPRESSED IN: 10 plant structures; EXPRESSED DURING: 4 anthesis, LP.04 four leaves visible, C globular stage; CONTAIN…	GO:0012505|endomembrane system GO:0004553|hydrolase activity hydrolyzing O-glycosyl compounds GO:0005975|carbohydrate metabolic process
AT4G20000	7	7	3	60	29	51	4	5	1	36	29	25	0.000539528	0.0402475	protein_coding VQ motif-containing protein VQ motif-containing protein; FUNCTIONS IN: molecular_function unknown; INVOLVED IN: biological_process unknown; LOCATED IN: cellular_component unknown; EXPRESSED IN: root; CONTAINS InterPro DOMAIN/s: VQ (InterPro:IPR008889); Has 59 Blast hits to 59 proteins in 7 species: Archae - 0; Bacteria - 0; Metazoa - 0; Fungi - 0; Plants - 59; Viruses - 0; Other Eu…	GO:0003674|molecular_function GO:0005575|cellular_component GO:0008150|biological_process
AT4G20360	7372	8293	7567	4500	1886	5499	5099	5840	2905	2622	1886	2026	0.000458972	0.0358995	protein_coding ATRABE1B (ARABIDOPSIS RAB GTPASE HOMOLOG E1B); GTP binding / GTPase/ translation elongation factor ARABIDOPSIS RAB GTPASE HOMOLOG E1B (ATRABE1B); FUNCTIONS IN: GTP binding, translation elongation factor activity, GTPase activity; INVOLVED IN: peptidyl-cysteine S-nitrosylation; LOCATED IN: in 9 components; EXPRESSED IN: 26 plant structures; EXPRESSED DURING: 14 growth stages; CONTAI…	GO:0009535|chloroplast thylakoid membrane GO:0003746|translation elongation factor activity
AT4G20830	1136	792	2707	4528	3261	10277	805	561	1055	2634	3261	3658	1.08497e-08	5.74646e-06	protein_coding FAD-binding domain-containing protein FAD-binding domain-containing protein; FUNCTIONS IN: electron carrier activity, oxidoreductase activity, FAD binding, catalytic activity; INVOLVED IN: response to oxidative stress; LOCATED IN: mitochondrion, apoplast, plasma membrane, vacuole, plant-type cell wall; EXPRESSED IN: 26 plant structures; EXPRESSED DURING: 14 growth stages; CONTAINS …	GO:0006979|response to oxidative stress GO:0009055|electron carrier activity GO:0009505|plant-type cell wall GO:0005886|plasma membrane
AT4G20860	240	145	200	2247	1739	2120	162	111	76	1305	1739	767	5.41095e-15	1.05585e-11	protein_coding FAD-binding domain-containing protein FAD-binding domain-containing protein; FUNCTIONS IN: electron carrier activity, oxidoreductase activity, FAD binding, catalytic activity; INVOLVED IN: response to cyclopentenone; LOCATED IN: endomembrane system; EXPRESSED IN: 10 plant structures; EXPRESSED DURING: LP.06 six leaves visible, 4 anthesis, LP.04 four leaves visible, LP.10 ten leaves…	GO:0009055|electron carrier activity GO:0012505|endomembrane system
AT4G21120	100	97	124	394	263	833	63	68	58	236	263	302	9.75473e-05	0.0112316	protein_coding AAT1 (AMINO ACID TRANSPORTER 1); L-glutamate transmembrane transporter/ L-lysine transmembrane transporter/ arginine transmembrane transporter/ cationic amino acid transmembrane transporter Encodes a member of the cationic amino acid transporter (CAT) subfamily of amino acid polyamine choline transporters. Mediates efficient uptake of Lys, Arg and Glu in a yeast system. AMINO ACID …	GO:0043091|L-arginine import GO:0015802|basic amino acid transport GO:0005313|L-glutamate transmembrane transporter activity GO:0016020|membrane GO:0015189|L-lysine transmembrane transporter activity GO:0015181|arginine transmembrane transporter activity GO:0015326|cationic amino acid transmembrane transporter activity GO:0051938|L-glutamate import
AT4G21400	15	18	42	139	71	173	9	12	15	88	71	68	0.000182023	0.0178978	protein_coding protein kinase family protein protein kinase family protein; FUNCTIONS IN: kinase activity; INVOLVED IN: protein amino acid phosphorylation; LOCATED IN: endomembrane system; EXPRESSED IN: 19 plant structures; EXPRESSED DURING: 12 growth stages; CONTAINS InterPro DOMAIN/s: Protein kinase, ATP binding site (InterPro:IPR017441), Serine/threonine protein kinase (InterPro:IPR002290), Pr…	GO:0012505|endomembrane system GO:0016301|kinase activity GO:0006468|protein amino acid phosphorylation
AT4G21410	25	9	67	234	118	443	17	5	22	147	118	164	4.74926e-07	0.000144327	protein_coding protein kinase family protein protein kinase family protein; FUNCTIONS IN: kinase activity; INVOLVED IN: response to abscisic acid stimulus; LOCATED IN: plasma membrane, vacuole; EXPRESSED IN: 21 plant structures; EXPRESSED DURING: 13 growth stages; CONTAINS InterPro DOMAIN/s: Protein kinase, ATP binding site (InterPro:IPR017441), Protein kinase, core (InterPro:IPR000719), Protein …	GO:0012505|endomembrane system GO:0016301|kinase activity GO:0009737|response to abscisic acid stimulus
AT4G22470	9719	16365	9296	38866	31942	95039	6823	11578	3643	22680	31942	34455	4.4216e-17	1.02457e-13	protein_coding protease inhibitor/seed storage/lipid transfer protein (LTP) family protein protease inhibitor/seed storage/lipid transfer protein (LTP) family protein; FUNCTIONS IN: lipid binding; INVOLVED IN: lipid transport; LOCATED IN: endomembrane system; EXPRESSED IN: embryo, sepal, hypocotyl, stamen; EXPRESSED DURING: 4 anthesis, C globular stage, petal differentiation and expansion stage; …	GO:0008289|lipid binding GO:0012505|endomembrane system GO:0006869|lipid transport
AT4G23210	638	424	1687	1868	1341	4813	451	307	651	1065	1341	1750	5.97963e-05	0.00775157	protein_coding protein kinase family protein Encodes a Cysteine-rich receptor-like kinase (CRK13). Overexpression of CRK13 leads to hypersensitive response cell death, and induces defense against pathogens by causing increased accumulation of salicylic acid. CYSTEINE-RICH RECEPTOR-LIKE KINASE 13 (CRK13); FUNCTIONS IN: kinase activity; INVOLVED IN: defense response to bacterium, response to molecu…	GO:0012505|endomembrane system GO:0009626|plant-type hypersensitive response GO:0016301|kinase activity GO:0042742|defense response to bacterium GO:0002237|response to molecule of bacterial origin
AT4G23215	20	8	36	124	67	151	14	7	9	68	67	68	0.000165843	0.0164842	pseudogene pseudogene of cysteine-rich receptor-like protein kinase family protein	none
AT4G23300	90	110	179	415	304	695	67	73	62	250	304	264	0.000142412	0.0147484	protein_coding protein kinase family protein protein kinase family protein; FUNCTIONS IN: kinase activity; INVOLVED IN: protein amino acid phosphorylation; LOCATED IN: endomembrane system; EXPRESSED IN: 8 plant structures; EXPRESSED DURING: 7 growth stages; CONTAINS InterPro DOMAIN/s: Protein kinase, ATP binding site (InterPro:IPR017441), Protein kinase, core (InterPro:IPR000719), Protein of unkn…	GO:0012505|endomembrane system GO:0016301|kinase activity GO:0006468|protein amino acid phosphorylation
AT4G23470	123	81	185	603	771	492	83	47	63	347	771	158	1.0159e-07	3.76644e-05	protein_coding hydroxyproline-rich glycoprotein family protein hydroxyproline-rich glycoprotein family protein; EXPRESSED IN: 22 plant structures; EXPRESSED DURING: 13 growth stages; CONTAINS InterPro DOMAIN/s: Protein of unknown function Cys-rich (InterPro:IPR006461); BEST Arabidopsis thaliana protein match is: proline-rich family protein (TAIR:AT1G63830.2); Has 7258 Blast hits to 4014 proteins …	none
AT4G23550	13	41	38	338	162	651	7	29	13	201	162	241	6.50264e-09	3.65281e-06	protein_coding WRKY29; transcription factor Encodes WRKY DNA-binding protein 29 (WRKY29). WRKY29; FUNCTIONS IN: transcription factor activity; INVOLVED IN: response to chitin, regulation of transcription, DNA-dependent; LOCATED IN: nucleus; CONTAINS InterPro DOMAIN/s: DNA-binding WRKY (InterPro:IPR003657); BEST Arabidopsis thaliana protein match is: WRKY22; transcription factor (TAIR:AT4G01250.1)…	GO:0005634|nucleus GO:0006355|regulation of transcription DNA-dependent GO:0003700|transcription factor activity
AT4G23810	166	43	168	519	495	906	117	31	68	306	495	321	3.51808e-06	0.000744309	protein_coding WRKY53; DNA binding / protein binding / transcription activator/ transcription factor member of WRKY Transcription Factor; Group III WRKY53; FUNCTIONS IN: protein binding, transcription factor activity, transcription activator activity, DNA binding; INVOLVED IN: positive regulation of transcription, defense response to bacterium, incompatible interaction, response to chitin, regula…	GO:0003677|DNA binding GO:0005634|nucleus GO:0045941|positive regulation of transcription GO:0006355|regulation of transcription DNA-dependent GO:0016563|transcription activator activity GO:0009816|defense response to bacterium incompatible interaction GO:0005515|protein binding GO:0031347|regulation of defense response GO:0003700|transcription factor activity
AT4G23890	1170	1255	1073	498	200	588	819	865	411	305	200	212	0.000396364	0.0320157	protein_coding unknown protein unknown protein; FUNCTIONS IN: molecular_function unknown; INVOLVED IN: biological_process unknown; LOCATED IN: chloroplast thylakoid membrane, chloroplast; EXPRESSED IN: 22 plant structures; EXPRESSED DURING: 13 growth stages; Has 252 Blast hits to 252 proteins in 67 species: Archae - 0; Bacteria - 101; Metazoa - 15; Fungi - 4; Plants - 21; Viruses - 0; Other Eukar…	GO:0003674|molecular_function GO:0009535|chloroplast thylakoid membrane GO:0008150|biological_process
AT4G25030	1030	933	2162	2840	1855	4953	687	674	828	1648	1855	1773	0.000546656	0.0405345	protein_coding unknown protein unknown protein; FUNCTIONS IN: molecular_function unknown; INVOLVED IN: biological_process unknown; LOCATED IN: cellular_component unknown; EXPRESSED IN: 22 plant structures; EXPRESSED DURING: 14 growth stages; BEST Arabidopsis thaliana protein match is: unknown protein (TAIR:AT5G45410.3); Has 71 Blast hits to 71 proteins in 18 species: Archae - 0; Bacteria - 20; Me…	GO:0003674|molecular_function GO:0005575|cellular_component GO:0008150|biological_process
AT4G25110	61	33	205	244	85	856	43	23	70	135	85	313	0.000573182	0.0420806	protein_coding AtMC2 (metacaspase 2); cysteine-type endopeptidase metacaspase 2 (AtMC2); FUNCTIONS IN: cysteine-type endopeptidase activity; INVOLVED IN: proteolysis; EXPRESSED IN: 7 plant structures; EXPRESSED DURING: 8 growth stages; CONTAINS InterPro DOMAIN/s: Peptidase C14, caspase catalytic (InterPro:IPR011600), Zinc finger, LSD1-type (InterPro:IPR005735); BEST Arabidopsis thaliana protein m…	GO:0006508|proteolysis
AT4G25350	1	0	11	34	12	137	1	0	4	20	12	46	0.000114153	0.0125585	protein_coding SHB1 (SHORT HYPOCOTYL UNDER BLUE1) SHB1 encodes a nuclear and cytosolic protein that has motifs homologous with SYG1 protein family members. Acts in cryptochrome signaling. Overexpression of SHB1 enhanced the expression of PHYTOCHROME-INTERACTING FACTOR4 (PIF4) under red light and promoted proteasome-mediated degradation of phytochrome A and hypocotyl elongation under far-red light…	GO:0010017|red or far red light signaling pathway GO:0003674|molecular_function GO:0005634|nucleus GO:0005829|cytosol GO:0016021|integral to membrane
AT4G26200	1	0	2	70	90	62	0	0	1	46	90	20	1.08273e-09	6.92107e-07	protein_coding ACS7; 1-aminocyclopropane-1-carboxylate synthase Member of a family of proteins in Arabidopsis that encode 1-Amino-cyclopropane-1-carboxylate synthase, an enzyme involved in ethylene biosynthesis. Not expressed in response to IAA. ACS7; FUNCTIONS IN: 1-aminocyclopropane-1-carboxylate synthase activity; INVOLVED IN: ethylene biosynthetic process; LOCATED IN: cellular_component unkno…	GO:0009693|ethylene biosynthetic process GO:0005575|cellular_component GO:0016847|1-aminocyclopropane-1-carboxylate synthase activity
AT4G26530	1971	1583	5145	816	281	1693	1373	1109	2076	491	281	601	7.55988e-06	0.00148298	protein_coding fructose-bisphosphate aldolase, putative fructose-bisphosphate aldolase, putative; FUNCTIONS IN: fructose-bisphosphate aldolase activity; INVOLVED IN: glycolysis, metabolic process; LOCATED IN: chloroplast; EXPRESSED IN: 18 plant structures; EXPRESSED DURING: 11 growth stages; CONTAINS InterPro DOMAIN/s: Aldolase-type TIM barrel (InterPro:IPR013785), Fructose-bisphosphate aldolase,…	GO:0005575|cellular_component GO:0004332|fructose-bisphosphate aldolase activity GO:0006096|glycolysis
AT4G30190	579	590	1673	3995	2220	9837	399	426	700	2310	2220	3577	4.04259e-11	3.40634e-08	protein_coding AHA2; ATPase/ hydrogen-exporting ATPase, phosphorylative mechanism belongs to the P-type ATPase superfamily of cation-transporting ATPases, pumps protons out of the cell, generating a proton gradient that drives the active transport of nutrients by proton symport. has two autoinhibitory regions within the C-terminal dom AHA2; FUNCTIONS IN: ATPase activity, hydrogen-exporting ATPase…	GO:0006810|transport GO:0008152|metabolic process GO:0008553|hydrogen-exporting ATPase activity phosphorylative mechanism GO:0006812|cation transport GO:0005886|plasma membrane GO:0015992|proton transport GO:0016887|ATPase activity
AT4G31500	1098	685	2949	5502	1698	6351	770	483	1133	3160	1698	2285	8.52243e-06	0.00161209	protein_coding CYP83B1 (CYTOCHROME P450 MONOOXYGENASE 83B1); oxidoreductase, acting on paired donors, with incorporation or reduction of molecular oxygen, NADH or NADPH as one donor, and incorporation of one atom of oxygen / oxygen binding Encodes an oxime-metabolizing enzyme in the biosynthetic pathway of glucosinolates. Is required for phytochrome signal transduction in red light. Mutation conf…	GO:0016709|oxidoreductase activity acting on paired donors with incorporation or reduction of molecular oxygen NADH or NADPH as one donor and incorporation of one atom of oxygen GO:0005783|endoplasmic reticulum GO:0048830|adventitious root development GO:0000162|tryptophan biosynthetic process GO:0009759|indole glucosinolate biosynthetic process GO:0019825|oxygen binding GO:0009641|shade avoidanc…
AT4G31550	251	155	183	826	567	778	168	114	72	488	567	273	7.88329e-05	0.0095203	protein_coding WRKY11; calmodulin binding / transcription factor member of WRKY Transcription Factor; Group II-d; negative regulator of basal resistance to Pseudomonas syringae. WRKY11; FUNCTIONS IN: transcription factor activity, calmodulin binding; INVOLVED IN: defense response to bacterium, response to chitin, regulation of transcription, DNA-dependent; LOCATED IN: nucleus; EXPRESSED IN: 23 pl…	GO:0005634|nucleus GO:0006355|regulation of transcription DNA-dependent GO:0042742|defense response to bacterium GO:0005516|calmodulin binding GO:0003700|transcription factor activity
AT4G32650	38	22	19	142	135	222	27	15	12	78	135	74	0.000286269	0.0254519	protein_coding ATKC1 (ARABIDOPSIS THALIANA K+ RECTIFYING CHANNEL 1); cyclic nucleotide binding / inward rectifier potassium channel A member of the Shaker family of voltage-gated potassium channel subunits. Does not form functional potassium channel on its own. Involved in down-regulating AKT1 and KAT1 channel activity by forming heteromers with AKT1 or KAT1. ARABIDOPSIS THALIANA K+ RECTIFYING CH…	GO:0005783|endoplasmic reticulum GO:0030551|cyclic nucleotide binding GO:0005242|inward rectifier potassium channel activity GO:0009624|response to nematode GO:0005886|plasma membrane
AT4G34200	180	140	369	637	328	1252	119	101	142	378	328	480	0.000439264	0.0347243	protein_coding EDA9 (embryo sac development arrest 9); ATP binding embryo sac development arrest 9 (EDA9); FUNCTIONS IN: ATP binding; INVOLVED IN: megagametogenesis; LOCATED IN: mitochondrion, chloroplast, membrane; EXPRESSED IN: 26 plant structures; EXPRESSED DURING: 13 growth stages; CONTAINS InterPro DOMAIN/s: D-3-phosphoglycerate dehydrogenase (InterPro:IPR006236), D-isomer specific 2-hydroxy…	GO:0016616|oxidoreductase activity acting on the CH-OH group of donors NAD or NADP as acceptor GO:0016597|amino acid binding GO:0051287|NAD binding GO:0003824|catalytic activity GO:0005488|binding GO:0004617|phosphoglycerate dehydrogenase activity GO:0009561|megagametogenesis GO:0005739|mitochondrion GO:0048037|cofactor binding
AT4G35100	400	336	403	114	60	113	290	229	174	67	60	43	0.000210591	0.0195191	protein_coding PIP3 (PLASMA MEMBRANE INTRINSIC PROTEIN 3); water channel a member of the plasma membrane intrinsic protein PIP. functions as aquaporin. Salt-stress-inducible MIP PLASMA MEMBRANE INTRINSIC PROTEIN 3 (PIP3); FUNCTIONS IN: water channel activity; INVOLVED IN: transport, response to salt stress; LOCATED IN: anchored to plasma membrane, nucleus, plasma membrane, vacuole, membrane; EXPR…	GO:0006810|transport GO:0015250|water channel activity GO:0016020|membrane GO:0009651|response to salt stress GO:0005886|plasma membrane
AT4G35480	26	6	71	136	119	148	17	4	28	87	119	55	0.00036783	0.0303053	protein_coding RHA3B; protein binding / zinc ion binding Encodes a putative RING-H2 finger protein RHA3b. RHA3B; FUNCTIONS IN: protein binding, zinc ion binding; INVOLVED IN: response to chitin; EXPRESSED IN: 20 plant structures; EXPRESSED DURING: 13 growth stages; CONTAINS InterPro DOMAIN/s: Zinc finger, RING-type (InterPro:IPR001841), Zinc finger, RING/FYVE/PHD-type (InterPro:IPR013083); BEST A…	GO:0005515|protein binding GO:0008270|zinc ion binding
AT4G35630	234	224	887	1506	474	2306	164	152	375	904	474	854	0.000103338	0.0116806	protein_coding PSAT; O-phospho-L-serine:2-oxoglutarate aminotransferase Encodes a phosphoserine aminotransferase which is involved in serine biosynthesis in the chloroplast which operates via the phosphorylated pathway. PSAT; FUNCTIONS IN: O-phospho-L-serine:2-oxoglutarate aminotransferase activity; INVOLVED IN: L-serine biosynthetic process; LOCATED IN: chloroplast stroma, chloroplast; EXPRESSED…	GO:0004648|phosphoserine transaminase activity GO:0006564|L-serine biosynthetic process GO:0009507|chloroplast
AT4G36670	288	202	212	2136	978	2455	207	144	85	1270	978	894	9.60568e-11	7.57724e-08	protein_coding mannitol transporter, putative mannitol transporter, putative; FUNCTIONS IN: carbohydrate transmembrane transporter activity, sugar:hydrogen symporter activity; INVOLVED IN: transport, transmembrane transport; LOCATED IN: integral to membrane, membrane; EXPRESSED IN: 19 plant structures; EXPRESSED DURING: 10 growth stages; CONTAINS InterPro DOMAIN/s: Sugar transporter, conserved si…	GO:0016020|membrane GO:0006810|transport GO:0008643|carbohydrate transport GO:0015144|carbohydrate transmembrane transporter activity GO:0005351|sugar:hydrogen symporter activity
AT4G37240	80	30	33	0	4	10	64	17	14	0	4	0	1.00655e-05	0.0018659	protein_coding unknown protein unknown protein; FUNCTIONS IN: molecular_function unknown; INVOLVED IN: N-terminal protein myristoylation; LOCATED IN: cellular_component unknown; EXPRESSED IN: 22 plant structures; EXPRESSED DURING: 13 growth stages; BEST Arabidopsis thaliana protein match is: unknown protein (TAIR:AT2G23690.1); Has 130 Blast hits to 130 proteins in 9 species: Archae - 0; Bacteria …	GO:0003674|molecular_function GO:0005575|cellular_component GO:0006499|N-terminal protein myristoylation
AT4G37520	181	95	292	779	542	1465	127	67	111	443	542	547	1.46094e-06	0.000365976	protein_coding peroxidase 50 (PER50) (P50) (PRXR2) peroxidase 50 (PER50) (P50) (PRXR2); FUNCTIONS IN: electron carrier activity, peroxidase activity, heme binding; INVOLVED IN: response to oxidative stress; LOCATED IN: cytoplasm; CONTAINS InterPro DOMAIN/s: Haem peroxidase (InterPro:IPR010255), Plant peroxidase (InterPro:IPR000823), Haem peroxidase, plant/fungal/bacterial (InterPro:IPR002016); BE…	GO:0006979|response to oxidative stress GO:0004601|peroxidase activity GO:0005737|cytoplasm
AT4G37530	287	220	759	1409	1099	2667	204	163	271	828	1099	939	4.46673e-07	0.000139163	protein_coding peroxidase, putative peroxidase, putative; FUNCTIONS IN: electron carrier activity, peroxidase activity, heme binding; INVOLVED IN: response to salt stress; LOCATED IN: endomembrane system; EXPRESSED IN: root; CONTAINS InterPro DOMAIN/s: Haem peroxidase (InterPro:IPR010255), Plant peroxidase (InterPro:IPR000823), Haem peroxidase, plant/fungal/bacterial (InterPro:IPR002016); BEST Ar…	GO:0012505|endomembrane system GO:0006979|response to oxidative stress GO:0004601|peroxidase activity
AT4G38770	8921	12489	39632	5956	2943	9934	6248	8777	15254	3504	2943	3588	1.22035e-08	6.37244e-06	protein_coding PRP4 (PROLINE-RICH PROTEIN 4) Encodes one of four proline-rich proteins in Arabidopsis which are predicted to localize to the cell wall. Transcripts are most abundant in aerial organs of the plant. PROLINE-RICH PROTEIN 4 (PRP4); LOCATED IN: cell wall; EXPRESSED IN: 24 plant structures; EXPRESSED DURING: 13 growth stages; CONTAINS InterPro DOMAIN/s: Protein of unknown function DUF12…	GO:0005618|cell wall
AT4G39230	67	21	183	206	131	640	42	13	72	126	131	240	0.000683707	0.0485243	protein_coding isoflavone reductase, putative encodes a protein whose sequence is similar to phenylcoumaran benzylic ether reductase (PCBER), which catalyzes NADPH-dependent reduction of 8-5' linked lignans such as dehydrodiconiferyl alcohol to give isodihydrodehydrodiconiferyl alcohol. isoflavone reductase, putative; FUNCTIONS IN: phenylcoumaran benzylic ether reductase activity; INVOLVED IN: re…	GO:0005575|cellular_component GO:0008152|metabolic process GO:0006808|regulation of nitrogen utilization GO:0032442|phenylcoumaran benzylic ether reductase activity
AT4G39830	48	11	109	130	96	563	32	7	42	69	96	202	0.000465737	0.0360485	protein_coding L-ascorbate oxidase, putative L-ascorbate oxidase, putative; FUNCTIONS IN: oxidoreductase activity, L-ascorbate oxidase activity, copper ion binding; INVOLVED IN: oxidation reduction; LOCATED IN: endomembrane system, extracellular region; EXPRESSED IN: 19 plant structures; EXPRESSED DURING: 12 growth stages; CONTAINS InterPro DOMAIN/s: Multicopper oxidase, type 3 (InterPro:IPR01170…	GO:0012505|endomembrane system GO:0005507|copper ion binding GO:0016491|oxidoreductase activity
AT5G01015	143	196	97	28	23	11	89	131	34	18	23	6	0.000360077	0.0298654	protein_coding unknown protein unknown protein; FUNCTIONS IN: molecular_function unknown; INVOLVED IN: biological_process unknown; LOCATED IN: endomembrane system; EXPRESSED IN: 23 plant structures; EXPRESSED DURING: 13 growth stages; BEST Arabidopsis thaliana protein match is: unknown protein (TAIR:AT1G65295.1); Has 54 Blast hits to 54 proteins in 8 species: Archae - 0; Bacteria - 0; Metazoa - 0…	GO:0003674|molecular_function GO:0012505|endomembrane system GO:0008150|biological_process
AT5G01100	40	40	102	137	163	472	27	26	43	78	163	171	0.000523476	0.0393669	protein_coding unknown protein unknown protein; FUNCTIONS IN: molecular_function unknown; INVOLVED IN: biological_process unknown; CONTAINS InterPro DOMAIN/s: Protein of unknown function DUF246, plant (InterPro:IPR004348); BEST Arabidopsis thaliana protein match is: unknown protein (TAIR:AT2G37980.1); Has 427 Blast hits to 424 proteins in 22 species: Archae - 0; Bacteria - 0; Metazoa - 1; Fungi -…	GO:0003674|molecular_function GO:0008150|biological_process
AT5G01540	39	39	78	235	158	350	32	23	31	140	158	133	0.00013703	0.014392	protein_coding LECRKA4.1 (LECTIN RECEPTOR KINASE A4.1); kinase Encodes LecRKA4.1, a member of the lectin receptor kinase subfamily A4 (LecRKA4.1 At5g01540; LecRKA4.2 At5g01550; LecRKA4.3 At5g01560). Together with other members of the subfamily, functions redundantly in the negative regulation of ABA response in seed germination. LECTIN RECEPTOR KINASE A4.1 (LECRKA4.1); FUNCTIONS IN: kinase activi…	GO:0012505|endomembrane system GO:0016301|kinase activity GO:0006499|N-terminal protein myristoylation GO:0009737|response to abscisic acid stimulus
AT5G02160	44	28	19	7	1	9	30	25	6	3	1	1	0.000675137	0.0483218	protein_coding unknown protein unknown protein; FUNCTIONS IN: molecular_function unknown; INVOLVED IN: biological_process unknown; LOCATED IN: chloroplast thylakoid membrane; EXPRESSED IN: 23 plant structures; EXPRESSED DURING: 13 growth stages; Has 20 Blast hits to 20 proteins in 8 species: Archae - 0; Bacteria - 0; Metazoa - 0; Fungi - 0; Plants - 20; Viruses - 0; Other Eukaryotes - 0 (source: …	GO:0003674|molecular_function GO:0009535|chloroplast thylakoid membrane GO:0008150|biological_process
AT5G03210	95	66	86	209	419	156	60	45	33	118	419	61	0.000182478	0.0178978	protein_coding unknown protein unknown protein; FUNCTIONS IN: molecular_function unknown; INVOLVED IN: biological_process unknown; LOCATED IN: endomembrane system; EXPRESSED IN: 11 plant structures; EXPRESSED DURING: 7 growth stages; Has 4 Blast hits to 4 proteins in 1 species: Archae - 0; Bacteria - 0; Metazoa - 0; Fungi - 0; Plants - 4; Viruses - 0; Other Eukaryotes - 0 (source: NCBI BLink).	GO:0003674|molecular_function GO:0012505|endomembrane system GO:0008150|biological_process
AT5G04860	5	22	23	97	79	135	2	15	10	55	79	44	0.000293489	0.0257846	protein_coding unknown protein unknown protein; INVOLVED IN: biological_process unknown; LOCATED IN: mitochondrion; EXPRESSED IN: male gametophyte, pollen tube; EXPRESSED DURING: M germinated pollen stage; BEST Arabidopsis thaliana protein match is: unknown protein (TAIR:AT3G11760.1); Has 151 Blast hits to 131 proteins in 41 species: Archae - 0; Bacteria - 6; Metazoa - 23; Fungi - 42; Plants - 56…	GO:0005739|mitochondrion GO:0008150|biological_process
AT5G05190	30	26	47	151	93	315	25	17	20	89	93	120	0.000458061	0.0358995	protein_coding unknown protein unknown protein; FUNCTIONS IN: molecular_function unknown; INVOLVED IN: biological_process unknown; LOCATED IN: cellular_component unknown; EXPRESSED IN: 19 plant structures; EXPRESSED DURING: 11 growth stages; BEST Arabidopsis thaliana protein match is: unknown protein (TAIR:AT3G56410.2); Has 4804 Blast hits to 1006 proteins in 190 species: Archae - 0; Bacteria - 2…	GO:0003674|molecular_function GO:0005575|cellular_component GO:0008150|biological_process
AT5G05340	27	49	108	138	144	863	17	33	47	78	144	327	2.18785e-05	0.00351284	protein_coding peroxidase, putative peroxidase, putative; FUNCTIONS IN: electron carrier activity, peroxidase activity, heme binding; INVOLVED IN: response to oxidative stress; LOCATED IN: apoplast, cell wall; EXPRESSED IN: 9 plant structures; EXPRESSED DURING: 4 anthesis, LP.04 four leaves visible, C globular stage, petal differentiation and expansion stage; CONTAINS InterPro DOMAIN/s: Haem pero…	GO:0012505|endomembrane system GO:0006979|response to oxidative stress GO:0004601|peroxidase activity
AT5G05600	2733	2533	6584	8422	7982	12215	1934	1802	2554	4917	7982	4418	1.59567e-06	0.000391026	protein_coding oxidoreductase, 2OG-Fe(II) oxygenase family protein oxidoreductase, 2OG-Fe(II) oxygenase family protein; FUNCTIONS IN: oxidoreductase activity, iron ion binding; INVOLVED IN: response to salt stress; EXPRESSED IN: 15 plant structures; EXPRESSED DURING: 9 growth stages; CONTAINS InterPro DOMAIN/s: Isopenicillin N synthase (InterPro:IPR002283), 2OG-Fe(II) oxygenase (InterPro:IPR00512…	GO:0005506|iron ion binding GO:0016491|oxidoreductase activity
AT5G05690	1027	1015	1156	459	202	523	697	717	465	261	202	175	0.000465482	0.0360485	protein_coding CPD (CONSTITUTIVE PHOTOMORPHOGENIC DWARF); electron carrier/ heme binding / iron ion binding / monooxygenase/ oxygen binding Encodes a member of the CP90A family, a cytochrome P450 monooxygenase which converts 6-deoxocathasterone to 6-deoxoteasterone in the late C6 oxidation pathway and cathasterone to teasterone in the early C6 oxidation pathway of brassinolide biosynthesis. Expre…	GO:0010268|brassinosteroid homeostasis GO:0009826|unidimensional cell growth GO:0016132|brassinosteroid biosynthetic process GO:0010224|response to UV-B GO:0019825|oxygen binding GO:0009911|positive regulation of flower development
AT5G05730	246	204	679	1428	488	2355	171	134	246	865	488	864	6.24039e-06	0.00123723	protein_coding ASA1 (ANTHRANILATE SYNTHASE ALPHA SUBUNIT 1); anthranilate synthase ASA1 encodes the alpha subunit of anthranilate synthase, which catalyzes the rate-limiting step of tryptophan synthesis. ASA1 is induced by ethylene, and forms a link between ethylene signalling and auxin synthesis in roots. ANTHRANILATE SYNTHASE ALPHA SUBUNIT 1 (ASA1); FUNCTIONS IN: anthranilate synthase activity;…	GO:0009611|response to wounding GO:0010386|lateral root primordium development GO:0005950|anthranilate synthase complex GO:0000162|tryptophan biosynthetic process GO:0009851|auxin biosynthetic process GO:0009723|response to ethylene stimulus GO:0004049|anthranilate synthase activity GO:0009617|response to bacterium GO:0009507|chloroplast
AT5G06320	995	490	3670	2167	1362	10653	696	350	1468	1277	1362	3903	0.000108322	0.0120602	protein_coding NHL3 encodes a protein whose sequence is similar to tobacco hairpin-induced gene (HIN1) and Arabidopsis non-race specific disease resistance gene (NDR1). Expression of this gene is induced by cucumber mosaic virus, spermine and Pseudomonas syringae pv. tomato DC3000. The gene product is localized to the plasma membrane. NHL3; FUNCTIONS IN: molecular_function unknown; INVOLVED IN: d…	GO:0003674|molecular_function GO:0051607|defense response to virus GO:0042742|defense response to bacterium GO:0009617|response to bacterium GO:0005886|plasma membrane
AT5G06570	91	83	182	494	296	1470	60	57	67	273	296	541	6.31218e-07	0.000185733	protein_coding hydrolase hydrolase; FUNCTIONS IN: hydrolase activity; INVOLVED IN: metabolic process; LOCATED IN: cellular_component unknown; EXPRESSED IN: 6 plant structures; EXPRESSED DURING: petal differentiation and expansion stage; CONTAINS InterPro DOMAIN/s: Alpha/beta hydrolase fold-3 (InterPro:IPR013094); BEST Arabidopsis thaliana protein match is: AtCXE17 (Arabidopsis thaliana carboxyest…	GO:0005575|cellular_component GO:0008152|metabolic process GO:0016787|hydrolase activity
AT5G06870	1879	984	3266	5550	5052	4794	1315	677	1235	3214	5052	1758	1.20521e-06	0.000316901	protein_coding PGIP2 (POLYGALACTURONASE INHIBITING PROTEIN 2); protein binding Encodes a polygalacturonase inhibiting protein involved in plant defense response. PGIPs inhibit the activity of pectin degrading enzymes such as those produced by fungal pathogens. PGIP2 is induced by fungal infection and methyl jasmonate. POLYGALACTURONASE INHIBITING PROTEIN 2 (PGIP2); FUNCTIONS IN: protein binding; …	GO:0009505|plant-type cell wall GO:0007165|signal transduction GO:0005515|protein binding GO:0006952|defense response
AT5G11670	968	620	1468	2444	1379	4508	680	423	560	1446	1379	1606	0.000209134	0.0194327	protein_coding ATNADP-ME2 (NADP-malic enzyme 2); malate dehydrogenase (oxaloacetate-decarboxylating) (NADP+)/ malic enzyme/ oxidoreductase, acting on NADH or NADPH, NAD or NADP as acceptor The malic enzyme (EC 1.1.1.40) encoded by AtNADP-ME2 is presumably a cytosolic enzyme involved in malate metabolism and possibly assisting the oxidative pentose phosphate pathway. AtNADP-ME2 counts for the majo…	GO:0004473|malate dehydrogenase (oxaloacetate-decarboxylating) (NADP+) activity GO:0005575|cellular_component GO:0004470|malic enzyme activity GO:0016652|oxidoreductase activity acting on NADH or NADPH NAD or NADP as acceptor GO:0009051|pentose-phosphate shunt oxidative branch GO:0006108|malate metabolic process
AT5G13220	339	176	657	5588	4586	3189	242	123	244	3327	4586	1103	2.34789e-23	9.672e-20	protein_coding JAZ10 (JASMONATE-ZIM-DOMAIN PROTEIN 10) Plants overexpressing At5g13220.3, but not At5g13220.1 showed enhanced insensitivity to MeJa. JASMONATE-ZIM-DOMAIN PROTEIN 10 (JAZ10); FUNCTIONS IN: molecular_function unknown; INVOLVED IN: response to jasmonic acid stimulus, response to wounding; LOCATED IN: nucleus; EXPRESSED IN: 21 plant structures; EXPRESSED DURING: 11 growth stages; CONT…	GO:0003674|molecular_function GO:0005575|cellular_component GO:0009753|response to jasmonic acid stimulus
AT5G13420	302	212	518	1176	674	1589	212	151	198	675	674	586	6.96611e-05	0.00872393	protein_coding transaldolase, putative transaldolase, putative; FUNCTIONS IN: catalytic activity, transaldolase activity; INVOLVED IN: response to cadmium ion; LOCATED IN: mitochondrion, chloroplast stroma, chloroplast; EXPRESSED IN: 25 plant structures; EXPRESSED DURING: 15 growth stages; CONTAINS InterPro DOMAIN/s: Transaldolase subfamily (InterPro:IPR004732), Aldolase-type TIM barrel (InterPro…	GO:0019658|glucose catabolic process to lactate and acetate GO:0004801|transaldolase activity GO:0008152|metabolic process GO:0006098|pentose-phosphate shunt GO:0009052|pentose-phosphate shunt non-oxidative branch GO:0006015|5-phosphoribose 1-diphosphate biosynthetic process GO:0005975|carbohydrate metabolic process GO:0005739|mitochondrion
AT5G15780	355	496	266	119	75	61	261	358	93	62	75	16	5.67649e-05	0.00748466	protein_coding pollen Ole e 1 allergen and extensin family protein pollen Ole e 1 allergen and extensin family protein; FUNCTIONS IN: molecular_function unknown; INVOLVED IN: biological_process unknown; LOCATED IN: endomembrane system; EXPRESSED IN: 14 plant structures; EXPRESSED DURING: 10 growth stages; CONTAINS InterPro DOMAIN/s: Pollen Ole e 1 allergen and extensin (InterPro:IPR006041); Has 7…	GO:0003674|molecular_function GO:0012505|endomembrane system GO:0008150|biological_process
AT5G16030	698	562	342	125	52	52	477	401	151	81	52	13	1.41421e-07	4.9935e-05	protein_coding unknown protein unknown protein; FUNCTIONS IN: molecular_function unknown; INVOLVED IN: biological_process unknown; LOCATED IN: cellular_component unknown; EXPRESSED IN: 20 plant structures; EXPRESSED DURING: 13 growth stages; BEST Arabidopsis thaliana protein match is: unknown protein (TAIR:AT3G02500.1); Has 38109 Blast hits to 13648 proteins in 698 species: Archae - 63; Bacteria …	GO:0003674|molecular_function GO:0005575|cellular_component GO:0008150|biological_process
AT5G16170	12	18	62	145	93	194	8	12	27	86	93	78	0.000322125	0.0275179	protein_coding unknown protein unknown protein; FUNCTIONS IN: molecular_function unknown; INVOLVED IN: biological_process unknown; LOCATED IN: cellular_component unknown; CONTAINS InterPro DOMAIN/s: Protein of unknown function DUF266, plant (InterPro:IPR004949); BEST Arabidopsis thaliana protein match is: unknown protein (TAIR:AT5G11730.1); Has 329 Blast hits to 329 proteins in 11 species: Archae…	GO:0003674|molecular_function GO:0005575|cellular_component GO:0008150|biological_process
AT5G19230	241	236	708	2235	1267	5198	168	160	277	1314	1267	1901	3.39466e-12	3.59591e-09	protein_coding unknown protein unknown protein; FUNCTIONS IN: molecular_function unknown; INVOLVED IN: biological_process unknown; LOCATED IN: anchored to plasma membrane, plasma membrane, anchored to membrane; EXPRESSED IN: callus; BEST Arabidopsis thaliana protein match is: unknown protein (TAIR:AT5G19240.1); Has 42 Blast hits to 41 proteins in 9 species: Archae - 0; Bacteria - 0; Metazoa - 0; …	GO:0003674|molecular_function GO:0031225|anchored to membrane GO:0008150|biological_process
AT5G19240	1142	472	2857	3475	2130	4839	822	340	1083	2063	2130	1757	0.000105746	0.0118803	protein_coding unknown protein unknown protein; FUNCTIONS IN: molecular_function unknown; INVOLVED IN: biological_process unknown; LOCATED IN: endomembrane system; EXPRESSED IN: 24 plant structures; EXPRESSED DURING: 14 growth stages; BEST Arabidopsis thaliana protein match is: unknown protein (TAIR:AT5G19230.1); Has 42 Blast hits to 41 proteins in 9 species: Archae - 0; Bacteria - 0; Metazoa - 0…	GO:0003674|molecular_function GO:0012505|endomembrane system GO:0008150|biological_process
AT5G20050	183	191	100	667	304	574	116	127	35	410	304	213	0.000651173	0.0468782	protein_coding protein kinase family protein protein kinase family protein; FUNCTIONS IN: kinase activity; INVOLVED IN: protein amino acid phosphorylation; LOCATED IN: endomembrane system; EXPRESSED IN: 23 plant structures; EXPRESSED DURING: 13 growth stages; CONTAINS InterPro DOMAIN/s: Protein kinase, ATP binding site (InterPro:IPR017441), Protein kinase, core (InterPro:IPR000719), Serine/threon…	GO:0012505|endomembrane system GO:0016301|kinase activity GO:0006468|protein amino acid phosphorylation
AT5G20230	1567	864	1617	2659	1793	7504	1090	600	627	1544	1793	2673	0.000142013	0.0147484	protein_coding ATBCB (ARABIDOPSIS BLUE-COPPER-BINDING PROTEIN); copper ion binding / electron carrier Al-stress-induced gene ARABIDOPSIS BLUE-COPPER-BINDING PROTEIN (ATBCB); FUNCTIONS IN: electron carrier activity, copper ion binding; INVOLVED IN: response to oxidative stress, response to salt stress, response to wounding, aluminum ion transport, response to absence of light; LOCATED IN: anchored…	GO:0009611|response to wounding GO:0006979|response to oxidative stress GO:0009646|response to absence of light GO:0005507|copper ion binding GO:0006118|electron transport GO:0015690|aluminum ion transport GO:0031225|anchored to membrane
AT5G20700	2774	4931	3188	2354	742	1976	1897	3444	1282	1396	742	704	0.000533072	0.0398461	protein_coding senescence-associated protein-related senescence-associated protein-related; INVOLVED IN: biological_process unknown; EXPRESSED IN: 22 plant structures; EXPRESSED DURING: 13 growth stages; CONTAINS InterPro DOMAIN/s: Protein of unknown function DUF581 (InterPro:IPR007650); BEST Arabidopsis thaliana protein match is: senescence-associated protein-related (TAIR:AT1G74940.1); Has 265 …	GO:0008150|biological_process
AT5G24110	4	12	17	68	110	206	4	10	6	40	110	62	8.11994e-06	0.00156795	protein_coding WRKY30; transcription factor member of WRKY Transcription Factor; Group III WRKY30; FUNCTIONS IN: transcription factor activity; INVOLVED IN: regulation of transcription, DNA-dependent, regulation of transcription; LOCATED IN: nucleus; EXPRESSED IN: stem, stamen; EXPRESSED DURING: 4 anthesis; CONTAINS InterPro DOMAIN/s: DNA-binding WRKY (InterPro:IPR003657); BEST Arabidopsis thalia…	GO:0005634|nucleus GO:0006355|regulation of transcription DNA-dependent GO:0003700|transcription factor activity
AT5G24230	21	14	14	73	69	188	14	11	10	47	69	81	0.000560177	0.0412075	protein_coding LOCATED IN: cellular_component unknown; EXPRESSED IN: root; BEST Arabidopsis thaliana protein match is: triacylglycerol lipase (TAIR:AT5G24200.1); Has 125 Blast hits to 125 proteins in 14 species: Archae - 0; Bacteria - 0; Metazoa - 3; Fungi - 7; Plants - 115; Viruses - 0; Other Eukaryotes - 0 (source: NCBI BLink).	GO:0005575|cellular_component
AT5G24430	60	53	165	291	158	693	43	39	66	193	158	248	0.000328518	0.0279244	protein_coding calcium-dependent protein kinase, putative / CDPK, putative calcium-dependent protein kinase, putative / CDPK, putative; FUNCTIONS IN: in 6 functions; INVOLVED IN: N-terminal protein myristoylation; LOCATED IN: plasma membrane; EXPRESSED IN: 23 plant structures; EXPRESSED DURING: 13 growth stages; CONTAINS InterPro DOMAIN/s: Protein kinase, ATP binding site (InterPro:IPR017441), Pr…	GO:0006499|N-terminal protein myristoylation GO:0016301|kinase activity GO:0005509|calcium ion binding GO:0004723|calcium-dependent protein serine/threonine phosphatase activity
AT5G24490	1654	1272	974	636	210	358	1164	872	378	373	210	130	4.56817e-05	0.00621104	protein_coding 30S ribosomal protein, putative 30S ribosomal protein, putative; FUNCTIONS IN: structural constituent of ribosome, binding; INVOLVED IN: translation, primary metabolic process; LOCATED IN: ribosome, chloroplast; EXPRESSED IN: 22 plant structures; EXPRESSED DURING: 13 growth stages; CONTAINS InterPro DOMAIN/s: Ribosomal protein S30Ae/sigma 54 modulation protein (InterPro:IPR003489);…	GO:0005840|ribosome GO:0006412|translation GO:0003735|structural constituent of ribosome
AT5G25260	95	85	85	343	200	453	64	53	36	204	200	182	0.000553122	0.0407694	protein_coding FUNCTIONS IN: molecular_function unknown; INVOLVED IN: biological_process unknown; LOCATED IN: plasma membrane; EXPRESSED IN: cultured cell; CONTAINS InterPro DOMAIN/s: Band 7 protein (InterPro:IPR001107); BEST Arabidopsis thaliana protein match is: unknown protein (TAIR:AT5G25250.1); Has 4214 Blast hits to 3442 proteins in 652 species: Archae - 14; Bacteria - 1365; Metazoa - 1204;…	GO:0003674|molecular_function GO:0005575|cellular_component GO:0008150|biological_process
AT5G25930	13	11	38	163	54	208	9	8	13	94	54	86	4.02629e-05	0.00570769	protein_coding leucine-rich repeat family protein / protein kinase family protein leucine-rich repeat family protein / protein kinase family protein; FUNCTIONS IN: kinase activity; INVOLVED IN: protein amino acid phosphorylation; LOCATED IN: plasma membrane, membrane; EXPRESSED IN: 23 plant structures; EXPRESSED DURING: 14 growth stages; CONTAINS InterPro DOMAIN/s: Protein kinase, ATP binding sit…	GO:0012505|endomembrane system GO:0016301|kinase activity GO:0006468|protein amino acid phosphorylation
AT5G26920	67	28	88	307	155	403	48	19	35	193	155	155	9.85021e-05	0.0112775	protein_coding CBP60G (CAM-BINDING PROTEIN 60-LIKE.G); calmodulin binding Encodes a calmodulin-binding protein CBP60g (calmodulin binding protein 60-like.g). The calmodulin-binding domain is located near the N-terminus; calmodulin binding is dependent on Ca(2+). Inducible by both bacterial pathogen and MAMP (microbe-associated molecular pattern) treatments. Bacterial growth is enhanced in cbp60g …	GO:0005516|calmodulin binding GO:0008150|biological_process
AT5G27060	32	4	149	232	147	403	16	2	63	151	147	156	4.6102e-05	0.00623807	protein_coding AtRLP53 (Receptor Like Protein 53); kinase/ protein binding Receptor Like Protein 53 (AtRLP53); FUNCTIONS IN: protein binding, kinase activity; INVOLVED IN: signal transduction, defense response; LOCATED IN: endomembrane system; CONTAINS InterPro DOMAIN/s: Leucine-rich repeat, N-terminal (InterPro:IPR013210), Leucine-rich repeat (InterPro:IPR001611); BEST Arabidopsis thaliana prote…	GO:0012505|endomembrane system GO:0007165|signal transduction GO:0005515|protein binding GO:0006952|defense response GO:0016301|kinase activity
AT5G27420	53	19	31	221	118	266	42	13	10	121	118	94	0.00024442	0.0223198	protein_coding zinc finger (C3HC4-type RING finger) family protein zinc finger (C3HC4-type RING finger) family protein; FUNCTIONS IN: protein binding, zinc ion binding; INVOLVED IN: response to chitin, response to abscisic acid stimulus; LOCATED IN: endomembrane system; EXPRESSED IN: 17 plant structures; EXPRESSED DURING: 9 growth stages; CONTAINS InterPro DOMAIN/s: Zinc finger, RING-type (InterP…	GO:0012505|endomembrane system GO:0005515|protein binding GO:0008270|zinc ion binding GO:0009737|response to abscisic acid stimulus
AT5G28500	2131	3070	1918	1304	506	1048	1505	2181	766	756	506	358	0.000134655	0.0142639	protein_coding unknown protein unknown protein; FUNCTIONS IN: molecular_function unknown; INVOLVED IN: biological_process unknown; LOCATED IN: chloroplast stroma, chloroplast; EXPRESSED IN: 23 plant structures; EXPRESSED DURING: 13 growth stages; BEST Arabidopsis thaliana protein match is: unknown protein (TAIR:AT3G04550.1); Has 79 Blast hits to 79 proteins in 36 species: Archae - 0; Bacteria - 5…	GO:0003674|molecular_function GO:0008150|biological_process GO:0009507|chloroplast
AT5G33290	106	119	151	748	591	350	65	79	55	439	591	118	9.25495e-07	0.000254168	protein_coding XGD1 (XYLOGALACTURONAN DEFICIENT 1); UDP-xylosyltransferase/ catalytic Acts as a xylogalacturonan xylosyltransferase within the XGA biosynthesis pathway. Involved in pectin biosynthesis. XYLOGALACTURONAN DEFICIENT 1 (XGD1); FUNCTIONS IN: UDP-xylosyltransferase activity, catalytic activity; INVOLVED IN: xylogalacturonan metabolic process, pectin biosynthetic process; LOCATED IN: Gol…	GO:0035252|UDP-xylosyltransferase activity GO:0016020|membrane GO:0045489|pectin biosynthetic process GO:0005794|Golgi apparatus GO:0010398|xylogalacturonan metabolic process GO:0003824|catalytic activity
AT5G35735	654	571	2550	2557	2234	10168	441	387	1047	1454	2234	3724	4.12807e-08	1.71964e-05	protein_coding auxin-responsive family protein auxin-responsive family protein; LOCATED IN: plasma membrane, membrane; EXPRESSED IN: 21 plant structures; EXPRESSED DURING: 12 growth stages; CONTAINS InterPro DOMAIN/s: Uncharacterised conserved protein UCP037471 (InterPro:IPR017214), Protein of unknown function DUF568, DOMON-like (InterPro:IPR007613), DOMON related (InterPro:IPR005018), Cytochrome…	GO:0016020|membrane
AT5G36925	34	46	128	427	262	1127	21	28	53	232	262	413	1.78503e-08	8.85592e-06	protein_coding unknown protein unknown protein; FUNCTIONS IN: molecular_function unknown; INVOLVED IN: biological_process unknown; BEST Arabidopsis thaliana protein match is: unknown protein (TAIR:AT5G36920.1); Has 5 Blast hits to 5 proteins in 1 species: Archae - 0; Bacteria - 0; Metazoa - 0; Fungi - 0; Plants - 5; Viruses - 0; Other Eukaryotes - 0 (source: NCBI BLink).	GO:0003674|molecular_function GO:0008150|biological_process
AT5G37600	1144	943	1219	6867	3257	7724	828	674	446	4023	3257	2821	1.35492e-11	1.25585e-08	protein_coding ATGSR1; copper ion binding / glutamate-ammonia ligase encodes a cytosolic glutamine synthetase, the enzyme has high affinity with substrate ammonium ATGSR1; FUNCTIONS IN: glutamate-ammonia ligase activity, copper ion binding; INVOLVED IN: response to fructose stimulus, nitrate assimilation, response to light stimulus, response to sucrose stimulus, response to glucose stimulus; LOCA…	GO:0042128|nitrate assimilation GO:0004356|glutamate-ammonia ligase activity GO:0005829|cytosol
AT5G38710	127	145	182	650	208	1014	87	108	69	392	208	353	0.000287685	0.0254556	protein_coding proline oxidase, putative / osmotic stress-responsive proline dehydrogenase, putative proline oxidase, putative / osmotic stress-responsive proline dehydrogenase, putative; FUNCTIONS IN: proline dehydrogenase activity; INVOLVED IN: proline catabolic process, glutamate biosynthetic process; EXPRESSED IN: 21 plant structures; EXPRESSED DURING: 12 growth stages; CONTAINS InterPro DOMA…	GO:0006562|proline catabolic process GO:0006537|glutamate biosynthetic process GO:0004657|proline dehydrogenase activity
AT5G38870	945	2485	1016	556	340	437	651	1709	369	312	340	165	3.75513e-05	0.00544677	transposable_element_gene transposable element gene pseudogene, hypothetical protein	none
AT5G38900	15	22	35	154	87	190	8	15	14	82	87	67	0.000149302	0.0151654	protein_coding DSBA oxidoreductase family protein DSBA oxidoreductase family protein; FUNCTIONS IN: protein disulfide oxidoreductase activity; INVOLVED IN: biological_process unknown; LOCATED IN: cellular_component unknown; EXPRESSED IN: 16 plant structures; EXPRESSED DURING: 10 growth stages; CONTAINS InterPro DOMAIN/s: DSBA oxidoreductase (InterPro:IPR001853), Thioredoxin-like fold (InterPro:IP…	GO:0005575|cellular_component GO:0015035|protein disulfide oxidoreductase activity GO:0008150|biological_process
AT5G39580	80	37	75	558	405	1635	54	29	27	330	405	573	3.06013e-11	2.63847e-08	protein_coding peroxidase, putative peroxidase, putative; FUNCTIONS IN: electron carrier activity, peroxidase activity, heme binding; INVOLVED IN: defense response to fungus, N-terminal protein myristoylation; LOCATED IN: endomembrane system; EXPRESSED IN: 17 plant structures; EXPRESSED DURING: 12 growth stages; CONTAINS InterPro DOMAIN/s: Haem peroxidase (InterPro:IPR010255), Plant peroxidase (I…	GO:0050832|defense response to fungus GO:0012505|endomembrane system GO:0004601|peroxidase activity GO:0006499|N-terminal protein myristoylation
AT5G40780	403	226	633	1402	849	2360	278	149	243	826	849	870	8.28763e-06	0.00157571	protein_coding LHT1; amino acid transmembrane transporter Encodes LHT1 (lysine histidine transporter), a high-affinity transporter for cellular amino acid uptake in both root epidermis and leaf mesophyll. LHT1; FUNCTIONS IN: amino acid transmembrane transporter activity; INVOLVED IN: amino acid transport, amino acid import; LOCATED IN: plasma membrane, membrane; EXPRESSED IN: 22 plant structures;…	GO:0016020|membrane GO:0006865|amino acid transport GO:0043090|amino acid import GO:0015171|amino acid transmembrane transporter activity
AT5G42050	1099	756	1781	3435	2378	3084	784	526	695	2003	2378	1134	7.45385e-05	0.00924252	protein_coding FUNCTIONS IN: molecular_function unknown; EXPRESSED IN: 22 plant structures; EXPRESSED DURING: 13 growth stages; CONTAINS InterPro DOMAIN/s: Development and cell death domain (InterPro:IPR013989), Kelch related (InterPro:IPR013089); BEST Arabidopsis thaliana protein match is: unknown protein (TAIR:AT3G27090.1); Has 5084 Blast hits to 2870 proteins in 85 species: Archae - 0; Bacteri…	GO:0003674|molecular_function
AT5G42830	33	7	62	274	294	537	22	6	29	160	294	177	1.48592e-08	7.65144e-06	protein_coding transferase family protein transferase family protein; FUNCTIONS IN: transferase activity, transferring acyl groups other than amino-acyl groups, transferase activity; INVOLVED IN: biological_process unknown; LOCATED IN: cellular_component unknown; EXPRESSED IN: 17 plant structures; EXPRESSED DURING: 12 growth stages; CONTAINS InterPro DOMAIN/s: Transferase (InterPro:IPR003480); BE…	GO:0005575|cellular_component GO:0016740|transferase activity GO:0008150|biological_process
AT5G43290	3	74	12	247	149	556	3	54	7	149	149	211	1.28823e-06	0.000336347	protein_coding WRKY49; transcription factor member of WRKY Transcription Factor; Group II-c WRKY49; FUNCTIONS IN: transcription factor activity; INVOLVED IN: regulation of transcription, DNA-dependent, regulation of transcription; LOCATED IN: nucleus; CONTAINS InterPro DOMAIN/s: DNA-binding WRKY (InterPro:IPR003657); BEST Arabidopsis thaliana protein match is: WRKY57; transcription factor (TAIR:A…	GO:0005634|nucleus GO:0006355|regulation of transcription DNA-dependent GO:0003700|transcription factor activity
AT5G43580	13	10	2	72	123	47	9	8	1	34	123	17	3.36909e-05	0.00499636	protein_coding serine-type endopeptidase inhibitor Predicted to encode a PR (pathogenesis-related) peptide that belongs to the PR-6 proteinase inhibitor family. Six putative PR-6-type protein encoding genes are found in Arabidopsis: At2g38900, At2g38870, At5g43570, At5g43580, At3g50020 and At3g46860. serine-type endopeptidase inhibitor; FUNCTIONS IN: serine-type endopeptidase inhibitor activity; …	GO:0009611|response to wounding GO:0005575|cellular_component GO:0004867|serine-type endopeptidase inhibitor activity
AT5G44380	70	33	57	682	626	516	40	24	21	409	626	184	4.15707e-12	4.05588e-09	protein_coding FAD-binding domain-containing protein FAD-binding domain-containing protein; FUNCTIONS IN: electron carrier activity, oxidoreductase activity, FAD binding, catalytic activity; INVOLVED IN: response to oxidative stress; LOCATED IN: cell wall; EXPRESSED IN: shoot apex, sepal, hypocotyl, root, stamen; EXPRESSED DURING: 4 anthesis; CONTAINS InterPro DOMAIN/s: FAD-linked oxidase, FAD-bi…	GO:0006979|response to oxidative stress GO:0009055|electron carrier activity GO:0012505|endomembrane system
AT5G44390	34	25	54	250	172	319	21	20	25	154	172	119	1.01996e-05	0.00187995	protein_coding FAD-binding domain-containing protein FAD-binding domain-containing protein; FUNCTIONS IN: electron carrier activity, oxidoreductase activity, FAD binding, catalytic activity; LOCATED IN: endomembrane system; EXPRESSED IN: embryo, cotyledon, hypocotyl, root, stamen; EXPRESSED DURING: 4 anthesis, C globular stage; CONTAINS InterPro DOMAIN/s: FAD-linked oxidase, FAD-binding, subdomai…	GO:0009055|electron carrier activity GO:0012505|endomembrane system
AT5G44575	188	260	176	1061	718	1268	144	186	48	598	718	457	1.93013e-06	0.000461674	protein_coding unknown protein unknown protein; FUNCTIONS IN: molecular_function unknown; INVOLVED IN: biological_process unknown; LOCATED IN: endomembrane system; Has 5 Blast hits to 5 proteins in 1 species: Archae - 0; Bacteria - 0; Metazoa - 0; Fungi - 0; Plants - 5; Viruses - 0; Other Eukaryotes - 0 (source: NCBI BLink).	GO:0003674|molecular_function GO:0012505|endomembrane system GO:0008150|biological_process
AT5G44585	27	5	5	255	101	140	22	5	3	146	101	51	2.56015e-06	0.00058591	protein_coding unknown protein unknown protein; FUNCTIONS IN: molecular_function unknown; INVOLVED IN: biological_process unknown; LOCATED IN: endomembrane system; Has 2 Blast hits to 2 proteins in 1 species: Archae - 0; Bacteria - 0; Metazoa - 0; Fungi - 0; Plants - 2; Viruses - 0; Other Eukaryotes - 0 (source: NCBI BLink).	GO:0012505|endomembrane system
AT5G46050	150	154	269	741	327	1250	106	102	106	424	327	458	7.8048e-05	0.0095203	protein_coding PTR3 (PEPTIDE TRANSPORTER 3); dipeptide transporter/ transporter/ tripeptide transporter Encodes a di- and tri-peptide transporter involved in responses to wounding, virulent bacterial pathogens, and high NaCl concentrations. The protein is predicted to have 12 transmembrane helicies. PEPTIDE TRANSPORTER 3 (PTR3); FUNCTIONS IN: dipeptide transporter activity, tripeptide transporter…	GO:0016020|membrane GO:0006857|oligopeptide transport GO:0005215|transporter activity
AT5G48400	7	0	9	55	37	82	5	0	3	32	37	31	9.20946e-05	0.010771	protein_coding ATGLR1.2; intracellular ligand-gated ion channel member of Putative ligand-gated ion channel subunit family ATGLR1.2; FUNCTIONS IN: intracellular ligand-gated ion channel activity; INVOLVED IN: cellular calcium ion homeostasis, response to light stimulus; LOCATED IN: endomembrane system, membrane; EXPRESSED IN: 15 plant structures; EXPRESSED DURING: 7 growth stages; CONTAINS InterP…	GO:0012505|endomembrane system GO:0016020|membrane GO:0009416|response to light stimulus GO:0006874|cellular calcium ion homeostasis GO:0005217|intracellular ligand-gated ion channel activity
AT5G48430	9	9	2	1009	966	898	5	5	1	600	966	336	5.01844e-30	9.30293e-26	protein_coding aspartic-type endopeptidase aspartic-type endopeptidase; FUNCTIONS IN: aspartic-type endopeptidase activity; INVOLVED IN: proteolysis; LOCATED IN: endomembrane system; EXPRESSED IN: shoot apex, hypocotyl, root, leaf; CONTAINS InterPro DOMAIN/s: Peptidase aspartic, catalytic (InterPro:IPR009007), Peptidase A1 (InterPro:IPR001461); BEST Arabidopsis thaliana protein match is: extracel…	GO:0012505|endomembrane system GO:0006508|proteolysis
AT5G48540	124	79	105	484	234	663	88	54	47	265	234	232	0.000294937	0.0258489	protein_coding 33 kDa secretory protein-related 33 kDa secretory protein-related; FUNCTIONS IN: molecular_function unknown; INVOLVED IN: biological_process unknown; LOCATED IN: endomembrane system; EXPRESSED IN: 21 plant structures; EXPRESSED DURING: 13 growth stages; CONTAINS InterPro DOMAIN/s: Protein of unknown function DUF26 (InterPro:IPR002902); BEST Arabidopsis thaliana protein match is: re…	GO:0003674|molecular_function GO:0012505|endomembrane system GO:0008150|biological_process
AT5G48657	105	65	165	397	306	779	76	47	57	203	306	292	6.06312e-05	0.00781566	protein_coding defense protein-related defense protein-related; FUNCTIONS IN: molecular_function unknown; INVOLVED IN: biological_process unknown; LOCATED IN: chloroplast; BEST Arabidopsis thaliana protein match is: proline-rich family protein (TAIR:AT3G07195.1); Has 49 Blast hits to 47 proteins in 10 species: Archae - 0; Bacteria - 2; Metazoa - 6; Fungi - 0; Plants - 34; Viruses - 0; Other Eukar…	GO:0003674|molecular_function GO:0008150|biological_process GO:0009507|chloroplast
AT5G49730	318	141	167	64	16	46	222	94	54	37	16	20	0.000195962	0.0187037	protein_coding ATFRO6 (FERRIC REDUCTION OXIDASE 6); ferric-chelate reductase/ oxidoreductase Encodes a plasma membrane-located ferric chelate reductase. Its mRNA is expressed in green aerial tissues (shoot, flower and cotyledon) in a light- and cell differentiation-specific manner. FERRIC REDUCTION OXIDASE 6 (ATFRO6); FUNCTIONS IN: oxidoreductase activity, ferric-chelate reductase activity; INVOL…	GO:0016020|membrane GO:0000293|ferric-chelate reductase activity GO:0009416|response to light stimulus GO:0006118|electron transport GO:0016491|oxidoreductase activity
AT5G50200	309	248	691	1456	1303	4327	222	184	277	844	1303	1612	3.65004e-09	2.14802e-06	protein_coding WR3 (WOUND-RESPONSIVE 3); nitrate transmembrane transporter Wound-responsive gene 3 (WR3). Encodes a high-affinity nitrate transporter. Up-regulated by nitrate. Involved in jasmonic acid-independent wound signal transduction. WOUND-RESPONSIVE 3 (WR3); FUNCTIONS IN: nitrate transmembrane transporter activity; INVOLVED IN: nitrate transport, response to nitrate, response to wounding;…	GO:0009611|response to wounding GO:0015112|nitrate transmembrane transporter activity GO:0012505|endomembrane system GO:0010167|response to nitrate GO:0015706|nitrate transport
AT5G52310	8767	11791	11502	6089	2041	7277	6068	8306	4452	3578	2041	2634	5.7066e-05	0.00748466	protein_coding LTI78 (LOW-TEMPERATURE-INDUCED 78) cold regulated gene, the 5' region of cor78 has cis-acting regulatory elements that can impart cold-regulated gene expression LOW-TEMPERATURE-INDUCED 78 (LTI78); FUNCTIONS IN: molecular_function unknown; INVOLVED IN: in 7 processes; LOCATED IN: cellular_component unknown; EXPRESSED IN: 24 plant structures; EXPRESSED DURING: 14 growth stages; BEST …	GO:0005575|cellular_component GO:0009414|response to water deprivation GO:0006970|response to osmotic stress GO:0009409|response to cold GO:0042538|hyperosmotic salinity response GO:0009737|response to abscisic acid stimulus GO:0003674|molecular_function GO:0009651|response to salt stress GO:0009269|response to desiccation
AT5G53110	29	15	67	157	73	736	19	11	26	96	73	271	2.81509e-06	0.000624966	protein_coding FUNCTIONS IN: molecular_function unknown; INVOLVED IN: biological_process unknown; LOCATED IN: endomembrane system; EXPRESSED IN: 8 plant structures; EXPRESSED DURING: 4 anthesis, C globular stage, petal differentiation and expansion stage; BEST Arabidopsis thaliana protein match is: zinc finger (C3HC4-type RING finger) family protein (TAIR:AT2G46495.1); Has 118 Blast hits to 116 p…	GO:0012505|endomembrane system GO:0003674|molecular_function GO:0008150|biological_process
AT5G54160	845	583	6652	3455	2129	36360	590	396	2528	2011	2129	13160	6.21016e-13	6.97702e-10	protein_coding ATOMT1 (O-METHYLTRANSFERASE 1); caffeate O-methyltransferase/ myricetin 3'-O-methyltransferase/ quercetin 3-O-methyltransferase A caffeic acid/5-hydroxyferulic acid O-methyltransferase. Interacts with 14-4-3 proteins in yeast 2 hybrid assay. AtOMT1 (At5g54160) encodes a flavonol 3’-O-methyltransferase that is highly active towards quercetin and myricetin. The substrate specificity …	GO:0051555|flavonol biosynthetic process GO:0005634|nucleus GO:0047763|caffeate O-methyltransferase activity GO:0008171|O-methyltransferase activity GO:0009809|lignin biosynthetic process GO:0005829|cytosol GO:0005737|cytoplasm
AT5G54630	657	511	462	185	41	175	442	367	181	114	41	58	1.94098e-05	0.00319831	protein_coding zinc finger protein-related zinc finger protein-related; FUNCTIONS IN: transcription factor activity; INVOLVED IN: regulation of transcription; LOCATED IN: intracellular; EXPRESSED IN: 21 plant structures; EXPRESSED DURING: 13 growth stages; CONTAINS InterPro DOMAIN/s: Zinc finger, C2H2-like (InterPro:IPR015880), Zinc finger, C2H2-type (InterPro:IPR007087); BEST Arabidopsis thalian…	GO:0005622|intracellular GO:0045449|regulation of transcription GO:0003700|transcription factor activity
AT5G54770	7071	8296	29008	3336	1850	9854	4883	5809	11257	1959	1850	3548	8.73365e-08	3.28665e-05	protein_coding THI1; protein homodimerization Encodes a thiamine biosynthetic gene that has a dual function in thiamine biosynthesis and mitochondrial DNA damage tolerance. It appears to be involved in producing the thiazole portion of thiamine (vitamin B1). A crystal structure of the protein reveals that it forms a 2-ring homo-octamer. THI1; FUNCTIONS IN: protein homodimerization activity; INVOL…	GO:0009228|thiamin biosynthetic process GO:0009409|response to cold GO:0005739|mitochondrion GO:0010319|stromule GO:0006974|response to DNA damage stimulus GO:0009507|chloroplast
AT5G54810	1468	797	7298	5811	1781	16757	993	534	2816	3464	1781	6114	1.99269e-05	0.00325458	protein_coding TSB1 (TRYPTOPHAN SYNTHASE BETA-SUBUNIT 1); tryptophan synthase A.thaliana tryptophan synthase beta subunit (trpB) TRYPTOPHAN SYNTHASE BETA-SUBUNIT 1 (TSB1); FUNCTIONS IN: tryptophan synthase activity; INVOLVED IN: tryptophan biosynthetic process, response to oxidative stress, response to salt stress, indoleacetic acid biosynthetic process; LOCATED IN: chloroplast stroma, chloroplas…	GO:0006979|response to oxidative stress GO:0009684|indoleacetic acid biosynthetic process GO:0000162|tryptophan biosynthetic process GO:0004834|tryptophan synthase activity GO:0009507|chloroplast
AT5G55930	169	86	264	936	339	1630	116	60	102	526	339	568	1.3982e-06	0.00035264	protein_coding OPT1 (OLIGOPEPTIDE TRANSPORTER 1); oligopeptide transporter oligopeptide transporter OLIGOPEPTIDE TRANSPORTER 1 (OPT1); FUNCTIONS IN: oligopeptide transporter activity; INVOLVED IN: oligopeptide transport; LOCATED IN: membrane; EXPRESSED IN: 20 plant structures; EXPRESSED DURING: 12 growth stages; CONTAINS InterPro DOMAIN/s: Tetrapeptide transporter, OPT1/isp4 (InterPro:IPR004648),…	GO:0016020|membrane GO:0006857|oligopeptide transport GO:0015198|oligopeptide transporter activity
AT5G56850	108	161	122	38	13	38	80	111	48	24	13	8	0.00047691	0.0368195	protein_coding unknown protein unknown protein; EXPRESSED IN: 21 plant structures; EXPRESSED DURING: 13 growth stages; Has 2421 Blast hits to 1988 proteins in 222 species: Archae - 14; Bacteria - 205; Metazoa - 839; Fungi - 154; Plants - 92; Viruses - 2; Other Eukaryotes - 1115 (source: NCBI BLink).	none
AT5G57220	11	6	7	76	88	114	7	6	3	36	88	47	2.0267e-05	0.0032956	protein_coding CYP81F2; electron carrier/ heme binding / iron ion binding / monooxygenase/ oxygen binding member of CYP81F, involved in glucosinolate metabolism. Mutants had impaired resistance to fungi. CYP81F2; FUNCTIONS IN: electron carrier activity, monooxygenase activity, iron ion binding, oxygen binding, heme binding; INVOLVED IN: in 7 processes; LOCATED IN: endomembrane system; EXPRESSED I…	GO:0012505|endomembrane system GO:0019825|oxygen binding
AT5G58350	195	147	275	723	403	1134	141	107	106	379	403	428	0.000272533	0.0245843	protein_coding WNK4 (WITH NO K (=LYSINE) 4); kinase/ protein kinase Encodes a member of the WNK family (9 members in all) of protein kinases, the structural design of which is clearly distinct from those of other known protein kinases, such as receptor-like kinases and mitogen-activated protein kinases. Its transcription is under the control of circadian rhythms. WITH NO K (=LYSINE) 4 (WNK4); FUN…	GO:0005634|nucleus GO:0004672|protein kinase activity GO:0016301|kinase activity GO:0006468|protein amino acid phosphorylation GO:0005737|cytoplasm
AT5G61160	3	22	13	221	25	267	2	17	6	138	25	97	3.53333e-06	0.000744309	protein_coding AACT1 (anthocyanin 5-aromatic acyltransferase 1); transferase/ transferase, transferring acyl groups other than amino-acyl groups anthocyanin 5-aromatic acyltransferase 1 (AACT1); FUNCTIONS IN: transferase activity, transferring acyl groups other than amino-acyl groups, transferase activity; INVOLVED IN: biological_process unknown; LOCATED IN: cellular_component unknown; EXPRESSED …	GO:0005575|cellular_component GO:0016740|transferase activity GO:0008150|biological_process
AT5G61560	78	62	104	328	200	576	53	40	41	201	200	229	7.54646e-05	0.00932617	protein_coding protein kinase family protein protein kinase family protein; FUNCTIONS IN: in 6 functions; INVOLVED IN: protein amino acid phosphorylation, protein ubiquitination; LOCATED IN: chloroplast, plasma membrane; EXPRESSED IN: 21 plant structures; EXPRESSED DURING: 13 growth stages; CONTAINS InterPro DOMAIN/s: Protein kinase, ATP binding site (InterPro:IPR017441), U box (InterPro:IPR00361…	GO:0016301|kinase activity GO:0000151|ubiquitin ligase complex GO:0006950|response to stress GO:0016567|protein ubiquitination GO:0006468|protein amino acid phosphorylation
AT5G61790	36	31	214	324	173	405	21	21	85	185	173	139	0.000683707	0.0485243	protein_coding calnexin 1 (CNX1) calnexin 1 (CNX1); FUNCTIONS IN: unfolded protein binding, calcium ion binding; INVOLVED IN: protein folding; LOCATED IN: in 8 components; EXPRESSED IN: 26 plant structures; EXPRESSED DURING: 15 growth stages; CONTAINS InterPro DOMAIN/s: Calreticulin/calnexin, P (InterPro:IPR009033), Calreticulin/calnexin (InterPro:IPR001580), Calreticulin/calnexin, conserved site…	GO:0006457|protein folding GO:0005792|microsome GO:0005783|endoplasmic reticulum GO:0009505|plant-type cell wall GO:0051082|unfolded protein binding GO:0005509|calcium ion binding GO:0005739|mitochondrion
AT5G61890	140	237	485	739	795	1613	92	172	192	454	795	583	1.26033e-05	0.00219399	protein_coding AP2 domain-containing transcription factor family protein encodes a member of the ERF (ethylene response factor) subfamily B-4 of ERF/AP2 transcription factor family. The protein contains one AP2 domain. There are 7 members in this subfamily. AP2 domain-containing transcription factor family protein; FUNCTIONS IN: transcription factor activity, DNA binding; INVOLVED IN: regulation …	GO:0003677|DNA binding GO:0005634|nucleus GO:0006355|regulation of transcription DNA-dependent GO:0003700|transcription factor activity
AT5G62480	4	18	7	9	200	35	2	11	4	6	200	13	1.97786e-06	0.000470058	protein_coding ATGSTU9 (ARABIDOPSIS THALIANA GLUTATHIONE S-TRANSFERASE TAU 9); glutathione transferase Encodes glutathione transferase belonging to the tau class of GSTs. Naming convention according to Wagner et al. (2002). ARABIDOPSIS THALIANA GLUTATHIONE S-TRANSFERASE TAU 9 (ATGSTU9); FUNCTIONS IN: glutathione transferase activity; INVOLVED IN: toxin catabolic process; LOCATED IN: cytoplasm; EX…	GO:0004364|glutathione transferase activity GO:0009407|toxin catabolic process GO:0005737|cytoplasm
AT5G63530	1043	1641	582	451	227	267	703	1167	226	256	227	94	2.88009e-05	0.00441236	protein_coding ATFP3; metal ion binding / transition metal ion binding Farnesylated protein that binds metals. ATFP3; FUNCTIONS IN: transition metal ion binding, metal ion binding; INVOLVED IN: cellular transition metal ion homeostasis; LOCATED IN: plasma membrane; EXPRESSED IN: 22 plant structures; EXPRESSED DURING: 13 growth stages; CONTAINS InterPro DOMAIN/s: Heavy metal transport/detoxificati…	GO:0046872|metal ion binding GO:0046914|transition metal ion binding GO:0046916|cellular transition metal ion homeostasis
AT5G64040	2730	2141	2295	1256	622	949	1935	1506	941	729	622	349	0.000336182	0.0283271	protein_coding PSAN; calmodulin binding Encodes the only subunit of photosystem I located entirely in the thylakoid lumen. May be involved in the interaction between plastocyanin and the photosystem I complex. PSAN; FUNCTIONS IN: calmodulin binding; INVOLVED IN: photosynthetic electron transport in photosystem I; LOCATED IN: in 6 components; EXPRESSED IN: 23 plant structures; EXPRESSED DURING: 13…	GO:0009773|photosynthetic electron transport in photosystem I GO:0009535|chloroplast thylakoid membrane GO:0009543|chloroplast thylakoid lumen GO:0030093|chloroplast photosystem I GO:0005516|calmodulin binding GO:0009522|photosystem I
AT5G64100	0	0	0	25	10	49	0	0	0	17	10	19	2.20952e-05	0.00351579	protein_coding peroxidase, putative peroxidase, putative; FUNCTIONS IN: electron carrier activity, peroxidase activity, heme binding; INVOLVED IN: response to oxidative stress; LOCATED IN: cell wall; EXPRESSED IN: hypocotyl, root, callus; EXPRESSED DURING: seedling growth; CONTAINS InterPro DOMAIN/s: Haem peroxidase (InterPro:IPR010255), Plant peroxidase (InterPro:IPR000823), Haem peroxidase, pla…	GO:0012505|endomembrane system GO:0006979|response to oxidative stress GO:0004601|peroxidase activity
AT5G64120	454	358	581	5678	4317	9993	307	248	218	3317	4317	3654	6.83685e-25	4.2246e-21	protein_coding peroxidase, putative encodes a cell wall bound peroxidase that is induced by hypo-osmolarity peroxidase, putative; FUNCTIONS IN: peroxidase activity; INVOLVED IN: defense response to fungus, N-terminal protein myristoylation, respiratory burst; LOCATED IN: apoplast, cell wall, membrane; EXPRESSED IN: 17 plant structures; EXPRESSED DURING: 10 growth stages; CONTAINS InterPro DOMAIN/…	GO:0050832|defense response to fungus GO:0005618|cell wall GO:0004601|peroxidase activity GO:0006499|N-terminal protein myristoylation GO:0045730|respiratory burst
AT5G64660	10	22	13	112	92	64	9	16	4	60	92	23	0.000515762	0.0391464	protein_coding U-box domain-containing protein U-box domain-containing protein; FUNCTIONS IN: ubiquitin-protein ligase activity, binding; INVOLVED IN: response to chitin; LOCATED IN: ubiquitin ligase complex; EXPRESSED IN: 23 plant structures; EXPRESSED DURING: 11 growth stages; CONTAINS InterPro DOMAIN/s: U box (InterPro:IPR003613), Zinc finger, RING/FYVE/PHD-type (InterPro:IPR013083), Armadillo…	GO:0000151|ubiquitin ligase complex GO:0005488|binding GO:0004842|ubiquitin-protein ligase activity
AT5G64750	80	113	126	428	329	638	55	74	49	239	329	208	8.15506e-05	0.00975319	protein_coding ABR1 (ABA REPRESSOR1); DNA binding / transcription factor Encodes a putative transcription factor containing an AP2 domain. Is a member of the ERF (ethylene response factor) subfamily B-4 of ERF/AP2 transcription factor family. Expressed in response to ABA, osmotic stress, sugar stress and drought. Mutants are hypersensitive to these stresses. May be involved in regulation of ABA m…	GO:0003677|DNA binding GO:0005634|nucleus GO:0006355|regulation of transcription DNA-dependent GO:0006970|response to osmotic stress GO:0009749|response to glucose stimulus GO:0009788|negative regulation of abscisic acid mediated signaling GO:0003700|transcription factor activity GO:0009737|response to abscisic acid stimulus
AT5G64905	4	6	11	77	132	164	2	6	2	47	132	56	2.90759e-08	1.31171e-05	protein_coding PROPEP3 (Elicitor peptide 3 precursor) Elicitor peptide 3 precursor (PROPEP3); FUNCTIONS IN: molecular_function unknown; INVOLVED IN: defense response, response to salicylic acid stimulus; LOCATED IN: cellular_component unknown; EXPRESSED IN: inflorescence meristem, root, pollen tube; Has 9 Blast hits to 9 proteins in 2 species: Archae - 0; Bacteria - 0; Metazoa - 1; Fungi - 0; Pla…	GO:0003674|molecular_function GO:0005575|cellular_component GO:0006952|defense response
AT5G65390	116	198	80	11	15	18	85	133	24	4	15	7	1.06139e-05	0.00193848	protein_coding AGP7 AGP7; LOCATED IN: anchored to membrane; EXPRESSED IN: 18 plant structures; EXPRESSED DURING: 12 growth stages; Has 67907 Blast hits to 26759 proteins in 1358 species: Archae - 408; Bacteria - 17588; Metazoa - 17399; Fungi - 6154; Plants - 9463; Viruses - 2368; Other Eukaryotes - 14527 (source: NCBI BLink).	GO:0003674|molecular_function GO:0031225|anchored to membrane
AT5G66570	11035	10488	9819	6962	2602	5877	7701	7417	3827	4058	2602	2118	0.000159597	0.0160354	protein_coding PSBO1 (PS II OXYGEN-EVOLVING COMPLEX 1); oxygen evolving/ poly(U) binding Encodes a protein which is an extrinsic subunit of photosystem II and which has been proposed to play a central role in stabilization of the catalytic manganese cluster. In <i>Arabidopsis thaliana</i> the PsbO proteins are encoded by two genes: <i>psbO1</i> and <i>psbO2</i>. PsbO1 is the major isoform in the …	GO:0010287|plastoglobule GO:0030095|chloroplast photosystem II GO:0009535|chloroplast thylakoid membrane GO:0010242|oxygen evolving activity GO:0010205|photoinhibition GO:0009579|thylakoid GO:0035304|regulation of protein amino acid dephosphorylation GO:0009654|oxygen evolving complex GO:0042549|photosystem II stabilization GO:0019684|photosynthesis light reaction GO:0009543|chloroplast thylakoid…
AT5G67080	4	4	2	83	46	109	3	3	0	50	46	35	2.13739e-06	0.000501543	protein_coding MAPKKK19; ATP binding / kinase/ protein kinase/ protein serine/threonine kinase member of MEKK subfamily MAPKKK19; FUNCTIONS IN: protein serine/threonine kinase activity, protein kinase activity, kinase activity, ATP binding; INVOLVED IN: protein amino acid phosphorylation; LOCATED IN: cellular_component unknown; EXPRESSED IN: 10 plant structures; EXPRESSED DURING: L mature pollen …	GO:0005575|cellular_component GO:0016301|kinase activity GO:0006468|protein amino acid phosphorylation
AT5G67420	459	208	431	1173	1304	774	325	151	155	674	1304	292	2.52745e-05	0.0039372	protein_coding LBD37 (LOB DOMAIN-CONTAINING PROTEIN 37) LOB DOMAIN-CONTAINING PROTEIN 37 (LBD37); INVOLVED IN: biological_process unknown; LOCATED IN: cellular_component unknown; EXPRESSED IN: 23 plant structures; EXPRESSED DURING: 13 growth stages; CONTAINS InterPro DOMAIN/s: Lateral organ boundaries, LOB (InterPro:IPR004883); BEST Arabidopsis thaliana protein match is: LBD38 (LOB DOMAIN-CONTAIN…	GO:0003674|molecular_function GO:0005575|cellular_component GO:0008150|biological_process
ATCG00450	2	12	1	0	78	2	1	6	0	0	78	0	0.000380977	0.0310434	pre_trna tRNA-Val	none
ATCG00500	15	195	45	74	680	33	10	146	20	46	680	11	0.000138855	0.0145425	protein_coding Encodes the carboxytransferase beta subunit of the Acetyl-CoA carboxylase (ACCase) complex in plastids. This complex catalyzes the carboxylation of acetyl-CoA to produce malonyl-CoA, the first committed step in fatty acid synthesis. ACETYL-COENZYME A CARBOXYLASE CARBOXYL TRANSFERASE SUBUNIT BETA (ACCD); FUNCTIONS IN: acetyl-CoA carboxylase activity; INVOLVED IN: fatty acid biosynth…	none
*The 'original NBPSeq set' in the accompaning manuscript. Column A shows the AGI number for the differentially induced Arabidopsis thaliana gene. Columns B-D and E-G indicate the number of raw reads for the mock and hrcC-inoculated replicates, respectively. Columns H-J and K-M indicate the number of normalized reads for mock and hrcC-infected replicates, respectively. Column N, and O indicate the…
