# Supplementary material for: GENE-Counter: A Computational Pipeline for the Analysis of RNA-Seq Data for Gene Expression Differences
Source: PLoS One. 2011 Oct 6;6(10):e25279. doi: 10.1371/journal.pone.0025279 (PMC3188579; doi:10.1371/journal.pone.0025279)
Supplement: Table S2 — Enriched GO terms for the original set of differentially induced genes. (XLS) [file pone.0025279.s003.xls]

## Sheet: Support GENE-counter Induced
Table S2: Enriched GO terms for the original set of differentially induced genes*
Description	Cumbie	Denoux	Glazebrook	Mahalingum	Navarro	Thilmony	Truman	Tsuda	Wang	Any Support	Total Support Out of 9
kinase activity	YES	YES	YES	YES	YES	YES	YES	YES	YES	YES	8
protein amino acid phosphorylation	YES	NO	YES	YES	YES	YES	YES	YES	YES	YES	7
photosynthesis	NO	NO	NO	YES	NO	YES	YES	YES	YES	YES	5
jasmonic acid biosynthetic process	YES	YES	YES	YES	YES	NO	YES	YES	YES	YES	7
peroxidase activity	YES	YES	YES	YES	YES	YES	YES	YES	NO	YES	7
tryptophan biosynthetic process	YES	YES	YES	YES	YES	YES	YES	YES	YES	YES	8
phenylpropanoid biosynthetic process	YES	YES	YES	NO	YES	YES	YES	YES	YES	YES	7
chitinase activity	YES	YES	YES	NO	YES	YES	YES	YES	YES	YES	7
proteolysis	YES	NO	YES	YES	NO	YES	YES	YES	YES	YES	6
pectinesterase activity	YES	YES	YES	YES	YES	YES	YES	YES	NO	YES	7
electron carrier activity	YES	YES	YES	YES	NO	YES	YES	NO	NO	YES	5
lipid binding	YES	NO	NO	NO	NO	YES	YES	NO	NO	YES	2
glutathione transferase activity	YES	NO	YES	YES	YES	YES	YES	YES	YES	YES	7
allene-oxide cyclase activity	YES	YES	NO	NO	NO	NO	YES	NO	YES	YES	3
structural constituent of cell wall	NO	NO	NO	NO	NO	YES	YES	NO	NO	YES	2
anthranilate synthase activity	YES	YES	YES	NO	NO	YES	YES	NO	NO	YES	4
phenylpropanoid metabolic process	YES	YES	NO	YES	YES	NO	YES	NO	NO	YES	4
unidimensional cell growth	NO	NO	NO	NO	NO	NO	NO	NO	NO	NO	0
chlorophyll binding	NO	NO	NO	NO	NO	NO	NO	NO	NO	NO	0
lateral root primordium development	YES	YES	YES	NO	NO	YES	YES	NO	NO	YES	4
fructose-bisphosphate aldolase activity	NO	NO	NO	NO	NO	NO	NO	NO	NO	NO	0
poly(U) binding	NO	YES	NO	NO	NO	NO	NO	NO	NO	YES	1
hydrolase activity, hydrolyzing O-glycosyl compounds	YES	NO	YES	NO	YES	YES	NO	YES	YES	YES	5
serine-type endopeptidase inhibitor activity	YES	NO	NO	NO	NO	NO	NO	NO	NO	NO	0
carbohydrate metabolic process	YES	NO	YES	YES	YES	YES	YES	YES	YES	YES	7
lipid transport	YES	NO	NO	NO	NO	YES	YES	NO	NO	YES	2
protein ubiquitination	YES	NO	NO	YES	NO	YES	YES	NO	YES	YES	4
nitrogen fixation	YES	NO	NO	NO	NO	NO	YES	NO	NO	YES	1
carboxylesterase activity	YES	NO	NO	YES	NO	YES	YES	NO	YES	YES	4
dihydrocamalexic acid decarboxylase activity	YES	YES	YES	YES	NO	NO	YES	YES	YES	YES	6
extracellular matrix structural constituent	YES	NO	NO	NO	NO	YES	YES	NO	NO	YES	2
ribulose-1,5-bisphosphate carboxylase/oxygenase activator activity	NO	NO	NO	NO	NO	NO	NO	NO	NO	NO	0
lipid metabolic process	YES	NO	YES	YES	NO	YES	YES	YES	YES	YES	6
phenylcoumaran benzylic ether reductase activity	YES	NO	NO	NO	NO	NO	NO	NO	NO	NO	0
shikimate 5-dehydrogenase activity	YES	NO	NO	NO	NO	NO	NO	NO	NO	NO	0
serine-glyoxylate transaminase activity	NO	NO	NO	NO	NO	NO	NO	NO	NO	NO	0
serine-pyruvate transaminase activity	NO	NO	NO	NO	NO	NO	NO	NO	NO	NO	0
3-phosphoshikimate 1-carboxyvinyltransferase activity	NO	NO	NO	NO	NO	NO	NO	NO	NO	NO	0
oxygen binding	YES	YES	YES	YES	NO	YES	YES	YES	YES	YES	7
calmodulin binding	YES	NO	NO	NO	YES	YES	YES	YES	NO	YES	4
lignin biosynthetic process	YES	YES	YES	NO	NO	NO	YES	YES	NO	YES	4
coniferyl-alcohol glucosyltransferase activity	YES	NO	NO	NO	NO	NO	NO	NO	NO	NO	0
12-oxophytodienoate reductase activity	NO	NO	NO	NO	NO	NO	NO	NO	NO	NO	0
NADP binding	YES	YES	NO	NO	NO	NO	YES	NO	NO	YES	2
S-adenosylmethionine biosynthetic process	NO	YES	YES	YES	NO	NO	NO	YES	NO	YES	4
carbon utilization by fixation of carbon dioxide	NO	NO	NO	NO	NO	NO	NO	NO	NO	NO	0
phosphoserine transaminase activity	NO	YES	YES	NO	NO	YES	NO	NO	NO	YES	3
tyrosine transaminase activity	NO	YES	YES	NO	NO	NO	NO	NO	YES	YES	3
methionine adenosyltransferase activity	NO	YES	YES	YES	NO	NO	NO	YES	NO	YES	4
ribulose-bisphosphate carboxylase activity	NO	NO	NO	NO	NO	NO	NO	NO	NO	NO	0
L-serine biosynthetic process	NO	YES	YES	NO	NO	YES	NO	NO	NO	YES	3
response to wounding	YES	YES	YES	NO	YES	NO	YES	YES	YES	YES	6
endopeptidase inhibitor activity	YES	NO	NO	NO	NO	NO	NO	NO	NO	NO	0
malic enzyme activity	YES	YES	NO	NO	NO	NO	NO	NO	NO	YES	1
oxidoreductase activity, acting on NADH or NADPH, NAD or NADP as acceptor	YES	YES	NO	NO	NO	NO	YES	NO	NO	YES	2
growth factor activity	YES	YES	NO	NO	NO	NO	YES	NO	NO	YES	2
malate dehydrogenase (oxaloacetate-decarboxylating) (NADP+) activity	YES	NO	NO	NO	NO	NO	NO	NO	NO	NO	0
phosphoglycerate dehydrogenase activity	YES	NO	NO	NO	NO	NO	NO	NO	NO	NO	0
plasma membrane	YES	YES	YES	NO	NO	YES	YES	YES	NO	YES	5
fucosyltransferase activity	NO	NO	NO	NO	NO	NO	NO	YES	NO	YES	1
oxidoreductase activity, acting on the CH-OH group of donors, NAD or NADP as acceptor	YES	NO	NO	NO	NO	NO	NO	NO	NO	NO	0
UDP-glucuronate decarboxylase activity	NO	NO	NO	NO	NO	NO	NO	NO	NO	NO	0
lignin metabolic process	YES	NO	NO	NO	NO	NO	NO	NO	NO	NO	0
flavonol synthase activity	YES	YES	NO	NO	NO	NO	YES	NO	YES	YES	3
2-oxoglutarate-dependent dioxygenase activity	YES	YES	NO	NO	NO	NO	YES	NO	NO	YES	2
alanine-glyoxylate transaminase activity	NO	NO	NO	NO	NO	NO	NO	NO	NO	NO	0
1-aminocyclopropane-1-carboxylate synthase activity	NO	NO	YES	NO	YES	YES	YES	NO	YES	YES	5
reductive pentose-phosphate cycle	YES	YES	NO	YES	NO	NO	YES	NO	NO	YES	3
oligopeptide transport	YES	YES	YES	NO	NO	YES	YES	YES	NO	YES	5
somatic embryogenesis	YES	YES	YES	NO	YES	YES	YES	YES	NO	YES	6
NAD binding	YES	YES	YES	YES	NO	NO	YES	YES	YES	YES	6
translation	YES	NO	NO	YES	NO	NO	NO	NO	YES	YES	2
aromatic amino acid family biosynthetic process	YES	NO	YES	YES	YES	NO	YES	NO	YES	YES	5
megagametogenesis	YES	NO	YES	YES	NO	NO	YES	YES	NO	YES	4
protein disulfide oxidoreductase activity	YES	YES	NO	NO	NO	YES	YES	NO	NO	YES	3
cation transport	YES	NO	YES	NO	NO	NO	YES	NO	NO	YES	2
aluminum ion transport	NO	NO	NO	NO	NO	YES	YES	YES	NO	YES	3
arsenate reductase (glutaredoxin) activity	NO	NO	NO	NO	NO	NO	NO	NO	NO	NO	0
UDP-xylosyltransferase activity	YES	NO	NO	NO	NO	NO	NO	NO	NO	NO	0
lateral root development	YES	YES	NO	NO	NO	YES	YES	NO	NO	YES	3
organ morphogenesis	YES	NO	NO	YES	NO	YES	YES	NO	NO	YES	3
nucleotide-sugar metabolic process	YES	NO	YES	YES	NO	YES	YES	NO	YES	YES	5
pollen development	YES	YES	NO	NO	NO	NO	YES	NO	YES	YES	3
regulation of transcription, DNA-dependent	YES	YES	YES	NO	NO	YES	YES	YES	NO	YES	5
transaminase activity	NO	NO	YES	NO	NO	NO	NO	NO	YES	YES	2
calcium-dependent protein serine/threonine phosphatase activity	YES	NO	NO	YES	YES	NO	YES	NO	NO	YES	3
structural constituent of ribosome	YES	NO	NO	NO	NO	NO	NO	NO	NO	NO	0
translation elongation factor activity	NO	NO	NO	NO	NO	NO	NO	NO	NO	NO	0
lipase activity	YES	YES	YES	YES	NO	YES	YES	YES	YES	YES	7
pectinesterase inhibitor activity	YES	NO	NO	NO	NO	NO	NO	NO	NO	NO	0
flavonol biosynthetic process	YES	YES	NO	NO	NO	NO	NO	NO	NO	YES	1
embryonic development	YES	NO	YES	YES	YES	YES	YES	YES	YES	YES	7
structural constituent of cytoskeleton	NO	NO	NO	NO	NO	NO	NO	NO	NO	NO	0
oxidoreductase activity, acting on paired donors, with incorporation or reduction of molecular oxygen, 2-oxoglutarate as one donor, and incorporation of one atom each of oxygen into both donors	YES	NO	YES	NO	NO	YES	YES	YES	YES	YES	5
beta-fructofuranosidase activity	YES	YES	NO	NO	YES	NO	NO	NO	NO	YES	2
aging	YES	NO	YES	YES	NO	YES	YES	YES	YES	YES	6
protein amino acid dephosphorylation	NO	NO	NO	YES	YES	YES	NO	NO	NO	YES	3
fatty acid biosynthetic process	YES	NO	NO	NO	NO	YES	YES	NO	NO	YES	2
nitrate transmembrane transporter activity	YES	NO	NO	NO	NO	NO	YES	NO	NO	YES	1
defense response to fungus	YES	YES	YES	NO	NO	NO	YES	YES	YES	YES	5
flower development	YES	NO	YES	YES	NO	NO	YES	NO	YES	YES	4
lead ion transport	YES	NO	NO	YES	NO	YES	NO	NO	NO	YES	2
nutrient reservoir activity	YES	NO	NO	NO	NO	NO	NO	NO	NO	NO	0
choline kinase activity	YES	NO	NO	NO	NO	NO	NO	NO	NO	NO	0
multicellular organism growth	NO	YES	NO	NO	NO	YES	YES	YES	YES	YES	5
respiratory burst	YES	YES	YES	YES	YES	YES	YES	YES	NO	YES	7
enzyme binding	NO	NO	NO	NO	NO	NO	NO	NO	NO	NO	0
tetrapyrrole binding	NO	NO	NO	NO	NO	NO	NO	NO	NO	NO	0
trans-cinnamate 4-monooxygenase activity	NO	YES	NO	NO	NO	YES	YES	YES	NO	YES	4
carbohydrate binding	YES	NO	YES	NO	YES	YES	YES	NO	NO	YES	4
iron ion binding	NO	NO	NO	NO	NO	NO	YES	NO	NO	YES	1
protein serine/threonine phosphatase activity	YES	NO	NO	YES	YES	YES	YES	YES	NO	YES	5
cellular response to water deprivation	YES	NO	NO	NO	NO	NO	NO	NO	NO	NO	0
flavonoid biosynthetic process	YES	NO	YES	YES	NO	NO	NO	NO	NO	YES	2
response to oxidative stress	YES	NO	YES	NO	NO	NO	YES	NO	NO	YES	2
monosaccharide transmembrane transporter activity	YES	YES	NO	YES	NO	YES	YES	NO	NO	YES	4
defense response to bacterium	YES	NO	NO	NO	NO	NO	NO	NO	NO	NO	0
oxygen evolving activity	NO	NO	NO	NO	NO	NO	NO	NO	NO	NO	0
cellular response to starvation	YES	NO	NO	NO	NO	YES	YES	NO	NO	YES	2
systemic acquired resistance	NO	NO	YES	YES	NO	NO	NO	YES	NO	YES	3
pyruvate kinase activity	NO	NO	NO	NO	NO	NO	NO	NO	NO	NO	0
L-glutamate transmembrane transporter activity	YES	NO	NO	NO	NO	NO	NO	NO	NO	NO	0
ER to Golgi vesicle-mediated transport	YES	YES	NO	NO	NO	NO	NO	NO	NO	YES	1
amino acid import	YES	YES	NO	NO	NO	NO	NO	NO	NO	YES	1
*Column A presents the enriched GO terms identified using the parent-child-inheritance method to analyze the RNA-Seq data. In columns B-J, a "YES" indicates the GO term was also identified as enriched in the indicated microarray study (their analyses are presented in the subsequent sheets. Columns K and L, provide a summary of whether the enriched GO term was found in at least one other study ("Y…
Cumbie = this study
DENOUX, C., R. GALLETTI, N. MAMMARELLA, S. GOPALAN, D. WERCK et al., 2008 Activation of defense response pathways by OGs and Flg22 elicitors in Arabidopsis seedlings. Mol Plant 1: 423-445.
GLAZEBROOK, J., W. CHEN, B. ESTES, H. S. CHANG, C. NAWRATH et al., 2003 Topology of the network integrating salicylate and jasmonate signal transduction derived from global expression phenotyping. Plant J 34: 217-228.
MAHALINGAM, R., A. GOMEZ-BUITRAGO, N. ECKARDT, N. SHAH, A. GUEVARA-GARCIA et al., 2003 Characterizing the stress/defense transcriptome of Arabidopsis. Genome Biol 4: R20.
NAVARRO, L., C. ZIPFEL, O. ROWLAND, I. KELLER, S. ROBATZEK et al., 2004 The transcriptional innate immune response to flg22. Interplay and overlap with Avr gene-dependent defense responses and bacterial pathogenesis. Plant Physiol 135: 1113-1128.
THILMONY, R., W. UNDERWOOD and S. Y. HE, 2006 Genome-wide transcriptional analysis of the Arabidopsis thaliana interaction with the plant pathogen Pseudomonas syringae pv. tomato DC3000 and the human pathogen Escherichia coli O157:H7. Plant J 46: 34-53.
TRUMAN, W., M. T. DE ZABALA and M. GRANT, 2006 Type III effectors orchestrate a complex interplay between transcriptional networks to modify basal defence responses during pathogenesis and resistance. Plant J 46: 14-33.
TSUDA, K., M. SATO, J. GLAZEBROOK, J. D. COHEN and F. KATAGIRI, 2008 Interplay between MAMP-triggered and SA-mediated defense responses. Plant J 53: 763-775.
WANG, L., R. M. MITRA, K. D. HASSELMANN, M. SATO, L. LENARZ-WYATT et al., 2008 The genetic network controlling the Arabidopsis transcriptional response to Pseudomonas syringae pv. maculicola: roles of major regulators and the phytotoxin coronatine. Mol Plant Microbe Interact 21: 1408-1420.

## Sheet: GENE-counter GO terms Induced
Term ID	Description	PCI PVAL	Genes Having GO Term
GO:0016301	kinase activity	6.4701e-23	AT1G51890,AT5G27060,AT5G20050,AT5G61560,AT4G21410,AT5G58350,AT4G23210,AT2G37710,AT5G25930,AT1G61360,AT1G51820,AT5G24430,AT1G51800,AT1G09970,AT4G23300,AT1G25390,AT4G21400,AT2G19190,AT4G08850,AT1G51850,AT1G51860,AT5G67080,AT1G51790,AT5G01540
GO:0006468	protein amino acid phosphorylation	5.21889e-19	AT1G51890,AT5G20050,AT5G61560,AT5G58350,AT5G25930,AT1G61360,AT1G51820,AT1G51800,AT1G09970,AT4G23300,AT1G25390,AT4G21400,AT4G08850,AT1G56140,AT1G51850,AT1G51860,AT5G67080,AT1G51790
GO:0015979	photosynthesis	3.16558e-18	AT1G67740,AT1G14150,AT3G27690,AT1G27730,AT1G29930,AT1G29910,AT4G10340,AT3G54890
GO:0009695	jasmonic acid biosynthetic process	2.55359e-16	AT1G20510,AT1G72520,AT3G25780,AT2G06050,AT1G19640,AT3G25760
GO:0004601	peroxidase activity	3.86928e-15	AT5G64120,AT5G39580,AT5G05340,AT5G64100,AT4G37520,AT1G14540,AT4G37530
GO:0000162	tryptophan biosynthetic process	1.77317e-12	AT5G54810,AT5G05730,AT1G25220,AT4G31500,AT3G54640
GO:0009699	phenylpropanoid biosynthetic process	5.99395e-11	AT3G21230,AT2G30490,AT2G37040,AT3G53260
GO:0004568	chitinase activity	2.7054e-10	AT2G43620,AT3G54420,AT4G01700,AT1G02360
GO:0006508	proteolysis	3.57044e-09	AT4G16563,AT5G48430,AT3G51330,AT3G51340,AT4G25110,AT1G09750
GO:0030599	pectinesterase activity	3.94643e-08	AT2G26440,AT2G45220,AT3G43270,AT4G02330
GO:0009055	electron carrier activity	1.17243e-07	AT1G26410,AT4G20830,AT1G26380,AT4G20860,AT1G30730,AT5G44380,AT1G30700,AT1G30720,AT1G26420,AT1G60950,AT5G44390
GO:0008289	lipid binding	1.63307e-07	AT4G12470,AT4G12500,AT3G22120,AT2G10940,AT4G12490,AT4G12480,AT1G12090,AT2G45180,AT4G22470
GO:0004364	glutathione transferase activity	3.63393e-07	AT1G02930,AT1G02920,AT5G62480
GO:0046423	allene-oxide cyclase activity	4.17143e-07	AT3G25780,AT3G25760
GO:0005199	structural constituent of cell wall	4.21001e-07	AT1G76930,AT4G18670,AT3G22142
GO:0004049	anthranilate synthase activity	6.90082e-07	AT5G05730,AT1G25220
GO:0009698	phenylpropanoid metabolic process	1.26271e-06	AT1G51680,AT1G20510
GO:0009826	unidimensional cell growth	1.45857e-06	AT2G40610,AT1G75750,AT5G05690
GO:0016168	chlorophyll binding	1.74783e-06	AT3G27690,AT3G08940,AT1G29930,AT1G29910,AT4G10340,AT3G54890
GO:0010386	lateral root primordium development	2.37117e-06	AT5G05730,AT1G25220
GO:0004332	fructose-bisphosphate aldolase activity	2.48061e-06	AT4G26530,AT2G21330
GO:0008266	poly(U) binding	7.34474e-06	AT2G37220,AT5G66570
GO:0004553	hydrolase activity, hydrolyzing O-glycosyl compounds	8.02918e-06	AT3G13790,AT4G16260,AT4G19810
GO:0004867	serine-type endopeptidase inhibitor activity	8.61642e-06	AT2G38870,AT5G43580
GO:0005975	carbohydrate metabolic process	3.39647e-05	AT5G13420,AT4G16260,AT4G19810
GO:0006869	lipid transport	4.15708e-05	AT4G12470,AT4G12500,AT3G22120,AT2G10940,AT4G12490,AT4G12480,AT1G12090,AT2G45180,AT3G22142,AT4G22470
GO:0016567	protein ubiquitination	8.75187e-05	AT2G35930,AT5G61560
GO:0009399	nitrogen fixation	0.000150218	AT3G53180
GO:0004091	carboxylesterase activity	0.000177198	AT1G29660,AT3G14210
GO:0010298	dihydrocamalexic acid decarboxylase activity	0.000185701	AT3G26830
GO:0005201	extracellular matrix structural constituent	0.000198649	AT3G07390
GO:0046863	ribulose-1,5-bisphosphate carboxylase/oxygenase activator activity	0.000200481	AT2G39730
GO:0006629	lipid metabolic process	0.000333611	AT2G26560,AT1G29660
GO:0032442	phenylcoumaran benzylic ether reductase activity	0.000360425	AT4G39230
GO:0004764	shikimate 5-dehydrogenase activity	0.00036049	AT3G06350
GO:0050281	serine-glyoxylate transaminase activity	0.000367715	AT2G13360
GO:0004760	serine-pyruvate transaminase activity	0.000367715	AT2G13360
GO:0003866	3-phosphoshikimate 1-carboxyvinyltransferase activity	0.000368596	AT2G45300
GO:0019825	oxygen binding	0.000375241	AT3G26210,AT3G26830,AT2G27690,AT5G57220,AT1G13110,AT2G30750,AT2G45570,AT4G31500,AT5G05690
GO:0005516	calmodulin binding	0.000507595	AT2G39200,AT1G61560,AT3G45290,AT2G23320,AT2G41010,AT4G31550,AT2G24570,AT5G64040,AT5G26920
GO:0009809	lignin biosynthetic process	0.000513005	AT5G54160,AT1G80820
GO:0047209	coniferyl-alcohol glucosyltransferase activity	0.000526316	AT3G50740
GO:0016629	12-oxophytodienoate reductase activity	0.000539957	AT2G06050
GO:0050661	NADP binding	0.000549048	AT3G06350
GO:0006556	S-adenosylmethionine biosynthetic process	0.00060006	AT2G36880
GO:0015977	carbon utilization by fixation of carbon dioxide	0.000601233	AT1G67090
GO:0004648	phosphoserine transaminase activity	0.000735362	AT4G35630
GO:0004838	tyrosine transaminase activity	0.000735497	AT2G24850
GO:0004478	methionine adenosyltransferase activity	0.000736784	AT2G36880
GO:0016984	ribulose-bisphosphate carboxylase activity	0.00074239	AT1G67090
GO:0006564	L-serine biosynthetic process	0.000748615	AT4G35630
GO:0009611	response to wounding	0.000789549	AT3G13790,AT1G51680,AT2G38870,AT1G27730,AT1G72520,AT2G30490,AT2G37040,AT2G06050,AT5G05730,AT1G19640,AT1G71697,AT1G76930,AT5G50200,AT3G53260,AT5G20230,AT5G43580,AT2G24850
GO:0004866	endopeptidase inhibitor activity	0.000800641	AT1G17860
GO:0004470	malic enzyme activity	0.000899281	AT5G11670
GO:0016652	oxidoreductase activity, acting on NADH or NADPH, NAD or NADP as acceptor	0.000900252	AT5G11670
GO:0008083	growth factor activity	0.000905524	AT3G49780
GO:0004473	malate dehydrogenase (oxaloacetate-decarboxylating) (NADP+) activity	0.00107875	AT5G11670
GO:0004617	phosphoglycerate dehydrogenase activity	0.00108108	AT4G34200
GO:0005886	plasma membrane	0.0011337	AT4G35100,AT2G15970,AT4G20830,AT1G59870,AT1G15520,AT3G25780,AT3G07390,AT4G32650,AT2G39200,AT3G18830,AT1G61560,AT1G14870,AT3G45290,AT4G30190,AT4G08850,AT1G56140,AT5G06320
GO:0008417	fucosyltransferase activity	0.00123066	AT2G15390
GO:0016616	oxidoreductase activity, acting on the CH-OH group of donors, NAD or NADP as acceptor	0.00126172	AT4G34200
GO:0048040	UDP-glucuronate decarboxylase activity	0.00129967	AT2G47650
GO:0009808	lignin metabolic process	0.00135034	AT3G50740
GO:0045431	flavonol synthase activity	0.00143331	AT3G19010
GO:0010302	2-oxoglutarate-dependent dioxygenase activity	0.00143331	AT1G06620
GO:0008453	alanine-glyoxylate transaminase activity	0.00146964	AT2G13360
GO:0016847	1-aminocyclopropane-1-carboxylate synthase activity	0.00148423	AT4G26200
GO:0019253	reductive pentose-phosphate cycle	0.00157458	AT2G45290
GO:0006857	oligopeptide transport	0.00184259	AT5G55930,AT5G46050,AT1G65730
GO:0010262	somatic embryogenesis	0.00187705	AT3G54420
GO:0051287	NAD binding	0.00219378	AT4G34200
GO:0006412	translation	0.00223981	AT3G17170,AT5G24490
GO:0009073	aromatic amino acid family biosynthetic process	0.00224115	AT2G45300
GO:0009561	megagametogenesis	0.00229621	AT4G34200
GO:0015035	protein disulfide oxidoreductase activity	0.00233687	AT5G38900
GO:0006812	cation transport	0.00234062	AT1G64170,AT4G30190,AT1G05300
GO:0015690	aluminum ion transport	0.00235294	AT5G20230
GO:0008794	arsenate reductase (glutaredoxin) activity	0.00251753	AT4G15660
GO:0035252	UDP-xylosyltransferase activity	0.00255163	AT5G33290,AT4G01750
GO:0048527	lateral root development	0.00259867	AT1G08090
GO:0009887	organ morphogenesis	0.00262166	AT3G49780
GO:0009225	nucleotide-sugar metabolic process	0.00269018	AT2G47650
GO:0009555	pollen development	0.00274105	AT1G19180
GO:0006355	regulation of transcription, DNA-dependent	0.00295732	AT2G38470,AT1G18860,AT1G43160,AT3G23250,AT5G24110,AT2G40740,AT4G01250,AT4G23550,AT4G18430,AT1G68150,AT1G80840,AT5G64750,AT2G23320,AT5G61890,AT4G31550,AT5G43290,AT4G23810,AT2G24570,AT1G62300
GO:0008483	transaminase activity	0.00312615	AT2G24850
GO:0004723	calcium-dependent protein serine/threonine phosphatase activity	0.00317125	AT5G24430
GO:0003735	structural constituent of ribosome	0.00354215	AT3G17170,AT5G24490
GO:0003746	translation elongation factor activity	0.00446735	AT4G20360
GO:0016298	lipase activity	0.00450694	AT2G26560
GO:0046910	pectinesterase inhibitor activity	0.00458807	AT3G47380
GO:0051555	flavonol biosynthetic process	0.00477219	AT5G54160
GO:0009790	embryonic development	0.00490757	AT4G02380
GO:0005200	structural constituent of cytoskeleton	0.00494267	AT1G20010
GO:0016706	oxidoreductase activity, acting on paired donors, with incorporation or reduction of molecular oxygen, 2-oxoglutarate as one donor, and incorporation of one atom each of oxygen into both donors	0.0053802	AT2G36690
GO:0004564	beta-fructofuranosidase activity	0.00582729	AT3G13790
GO:0007568	aging	0.00588331	AT3G49620
GO:0006470	protein amino acid dephosphorylation	0.00620109	AT1G07160
GO:0006633	fatty acid biosynthetic process	0.00695753	AT1G64400
GO:0015112	nitrate transmembrane transporter activity	0.00699301	AT1G12940,AT5G50200,AT3G45060,AT1G08090
GO:0050832	defense response to fungus	0.00804126	AT4G12470,AT2G38870,AT5G64120,AT2G38470,AT4G12490,AT4G12480,AT5G39580,AT1G80840
GO:0009908	flower development	0.00847181	AT1G19180
GO:0015692	lead ion transport	0.00938967	AT1G15520
GO:0045735	nutrient reservoir activity	0.0120607	AT2G26560,AT4G16980,AT1G09560
GO:0004103	choline kinase activity	0.0121025	AT1G71697
GO:0035264	multicellular organism growth	0.0124836	AT1G27730
GO:0045730	respiratory burst	0.012643	AT5G64120
GO:0019899	enzyme binding	0.0151057	AT3G59400
GO:0046906	tetrapyrrole binding	0.0153762	AT3G59400
GO:0016710	trans-cinnamate 4-monooxygenase activity	0.017019	AT2G30490
GO:0030246	carbohydrate binding	0.0187151	AT1G61360,AT1G65390,AT3G16530,AT3G15356
GO:0005506	iron ion binding	0.0196239	AT1G72520,AT5G05600,AT2G38240,AT3G55970
GO:0004722	protein serine/threonine phosphatase activity	0.0211902	AT1G07160
GO:0042631	cellular response to water deprivation	0.0220887	AT2G15970,AT4G02380
GO:0009813	flavonoid biosynthetic process	0.0228003	AT3G19010
GO:0006979	response to oxidative stress	0.0287517	AT1G19020,AT1G27730,AT5G54810,AT1G52200,AT4G20830,AT3G10020,AT2G37040,AT1G02930,AT5G05340,AT1G14870,AT5G44380,AT3G53260,AT5G20230,AT4G02380,AT5G64100,AT4G37520,AT1G14540,AT4G37530
GO:0015145	monosaccharide transmembrane transporter activity	0.0289855	AT3G18830
GO:0042742	defense response to bacterium	0.0322558	AT4G23210,AT2G38470,AT1G80840,AT2G19190,AT4G31550,AT5G06320,AT2G24570,AT1G19180
GO:0010242	oxygen evolving activity	0.0332476	AT5G66570
GO:0009267	cellular response to starvation	0.0361446	AT3G49620
GO:0009627	systemic acquired resistance	0.0379147	AT1G59870
GO:0004743	pyruvate kinase activity	0.039753	AT2G36580
GO:0005313	L-glutamate transmembrane transporter activity	0.047619	AT4G21120
GO:0006888	ER to Golgi vesicle-mediated transport	0.0482234	AT3G52190
GO:0043090	amino acid import	0.0487805	AT5G40780

## Sheet: Cumbie GO terms Induced
Term	Desc	PCI PVAL	Genes
GO:0016301	kinase activity	5.6e-46	AT1G51890,AT3G49370,AT5G20050,AT5G61560,AT4G21410,AT5G58350,AT4G23210,AT5G01560,AT4G23190,AT1G61360,AT5G25930,AT5G46080,AT5G58940,AT5G44290,AT4G28350,AT1G51820,AT3G46930,AT1G28390,AT5G24430,AT1G51800,AT3G59700,AT2G39660,AT5G15730,AT1G66830,AT4G23220,AT1G09970,AT4G23300,AT1G61380,AT1G25390,AT4G21400,AT5G65600,AT3G20410,AT2G19190,AT2G05940,AT5G01550,AT5G51830,AT4G04510,AT5G55560,AT1G51850,AT3G08720…
GO:0006468	protein amino acid phosphorylation	3.4e-43	AT1G51890,AT2G02220,AT5G20050,AT5G61560,AT5G58350,AT5G01560,AT1G61360,AT5G25930,AT5G46080,AT5G58940,AT5G44290,AT4G28350,AT1G51820,AT3G46930,AT1G28390,AT1G51800,AT3G59700,AT5G15730,AT1G66830,AT4G23220,AT1G09970,AT4G23300,AT1G61380,AT1G25390,AT4G21400,AT5G65600,AT3G20410,AT2G05940,AT5G01550,AT4G04510,AT4G39270,AT5G55560,AT1G51850,AT3G08720,AT1G51860,AT1G79680,AT2G30360,AT1G61370,AT5G67080,AT1G74360…
GO:0004601	peroxidase activity	2.44e-09	AT5G64120,AT5G39580,AT5G64100,AT4G08770
GO:0006508	proteolysis	9.24e-09	AT3G02875,AT5G48430,AT3G51330,AT2G17760,AT1G65240,AT1G44350
GO:0030599	pectinesterase activity	1.01e-08	AT2G47550,AT2G45220,AT3G43270,AT4G02330
GO:0005975	carbohydrate metabolic process	6.53e-08	AT1G65610,AT1G80460,AT5G13420,AT4G16260,AT4G19810
GO:0016706	oxidoreductase activity, acting on paired donors, with incorporation or reduction of molecular oxygen, 2-oxoglutarate as one donor, and incorporation of one atom each of oxygen into both donors	2.58e-07	AT2G17720,AT2G36690,AT3G06300
GO:0000162	tryptophan biosynthetic process	2.94e-07	AT5G05730,AT4G31500,AT3G54640
GO:0016567	protein ubiquitination	7.79e-07	AT2G35930,AT5G61560,AT5G67340
GO:0004568	chitinase activity	1.02e-06	AT2G43620,AT3G54420,AT4G01700,AT1G02360,AT2G43590
GO:0009698	phenylpropanoid metabolic process	2.09e-06	AT1G51680,AT3G21240
GO:0005516	calmodulin binding	2.28e-06	AT3G63380,AT4G24240,AT2G39200,AT1G61560,AT4G37640,AT3G45290,AT4G33050,AT2G23320,AT4G31550,AT2G15760,AT2G24570,AT5G26920
GO:0019825	oxygen binding	5.7e-06	AT5G36220,AT3G26210,AT3G26830,AT2G27690,AT5G57220,AT4G19230,AT1G13110,AT2G30750,AT4G39950,AT4G31500
GO:0009809	lignin biosynthetic process	7.28e-06	AT5G14700,AT1G33030,AT5G54160
GO:0009073	aromatic amino acid family biosynthetic process	7.68e-06	AT1G48850,AT1G22410
GO:0048527	lateral root development	1.1e-05	AT5G13080,AT1G08090
GO:0009225	nucleotide-sugar metabolic process	1.19e-05	AT4G20460,AT1G30620
GO:0009699	phenylpropanoid biosynthetic process	1.67e-05	AT3G21230,AT2G37040
GO:0009055	electron carrier activity	2.57e-05	AT1G26410,AT4G20830,AT1G26380,AT4G20860,AT5G44380,AT1G30700,AT1G26420,AT5G44390
GO:0004723	calcium-dependent protein serine/threonine phosphatase activity	4.8e-05	AT3G49370,AT5G24430
GO:0030246	carbohydrate binding	4.91e-05	AT1G61360,AT4G28350,AT1G65390,AT5G45090,AT3G16530,AT1G61380,AT1G61370
GO:0007568	aging	6.44e-05	AT3G49620,AT3G10985
GO:0004364	glutathione transferase activity	6.86e-05	AT1G69930,AT2G29460
GO:0015450	P-P-bond-hydrolysis-driven protein transmembrane transporter activity	6.89e-05	AT3G48570,AT1G20350
GO:0004091	carboxylesterase activity	0.00019846	AT5G03610,AT1G53920
GO:0009399	nitrogen fixation	0.000223314	AT3G53180
GO:0010298	dihydrocamalexic acid decarboxylase activity	0.000275634	AT3G26830
GO:0005201	extracellular matrix structural constituent	0.000298775	AT3G07390
GO:0006629	lipid metabolic process	0.000329549	AT5G03610,AT1G53920
GO:0006812	cation transport	0.000332901	AT3G63380,AT1G64170,AT4G30190,AT1G05300
GO:0006857	oligopeptide transport	0.000354317	AT5G55930,AT4G21680,AT5G46050,AT1G65730
GO:0006569	tryptophan catabolic process	0.000445236	AT4G39950
GO:0009823	cytokinin catabolic process	0.000447127	AT4G29740
GO:0047209	coniferyl-alcohol glucosyltransferase activity	0.000519076	AT3G50740
GO:0010211	IAA-Leu conjugate hydrolase activity	0.000535475	AT3G02875
GO:0010210	IAA-Phe conjugate hydrolase activity	0.000535475	AT3G02875
GO:0010178	IAA-amino acid conjugate hydrolase activity	0.000535619	AT1G44350
GO:0050661	NADP binding	0.000541712	AT3G06350
GO:0010475	galactose-1-phosphate guanylyltransferase (GDP) activity	0.000544811	AT5G55120
GO:0006355	regulation of transcription, DNA-dependent	0.000552578	AT5G13080,AT4G17500,AT3G01970,AT1G43160,AT4G24240,AT2G16720,AT4G01250,AT4G01720,AT4G18430,AT1G80840,AT2G23320,AT5G61890,AT5G52830,AT4G31550,AT5G47220,AT5G07100,AT2G24570,AT4G39780,AT1G62300,AT3G50260
GO:0046423	allene-oxide cyclase activity	0.000553403	AT3G25780
GO:0008289	lipid binding	0.000670877	AT4G12470,AT4G12500,AT4G12490,AT4G12480,AT4G22470
GO:0032504	multicellular organism reproduction	0.00074664	AT1G19300
GO:0009626	plant-type hypersensitive response	0.000750293	AT4G23210,AT1G28380,AT3G54420
GO:0003849	3-deoxy-7-phosphoheptulonate synthase activity	0.000820793	AT1G22410
GO:0004049	anthranilate synthase activity	0.000827586	AT5G05730
GO:0008083	growth factor activity	0.000878349	AT3G49780
GO:0019496	serine-isocitrate lyase pathway	0.000894055	AT1G74030
GO:0010262	somatic embryogenesis	0.000942063	AT3G54420
GO:0016656	monodehydroascorbate reductase (NADH) activity	0.00106581	AT5G03630
GO:0016652	oxidoreductase activity, acting on NADH or NADPH, NAD or NADP as acceptor	0.00106638	AT5G11670
GO:0051015	actin filament binding	0.00130919	AT1G70140
GO:0015035	protein disulfide oxidoreductase activity	0.00186368	AT5G38900
GO:0004722	protein serine/threonine phosphatase activity	0.00188371	AT1G07630,AT2G28890
GO:0009932	cell tip growth	0.00195265	AT1G70140
GO:0009451	RNA modification	0.002	AT5G22250
GO:0009808	lignin metabolic process	0.00200758	AT3G50740
GO:0045431	flavonol synthase activity	0.00211948	AT3G19010
GO:0009555	pollen development	0.00219727	AT1G19180
GO:0009561	megagametogenesis	0.00223602	AT4G34200
GO:0019253	reductive pentose-phosphate cycle	0.00232313	AT2G45290
GO:0050832	defense response to fungus	0.00244063	AT4G12470,AT3G52400,AT2G38870,AT5G64120,AT4G12490,AT2G39660,AT4G12480,AT5G39580,AT1G80840,AT3G11820
GO:0004721	phosphoprotein phosphatase activity	0.00265675	AT3G02800
GO:0009887	organ morphogenesis	0.00272885	AT3G49780
GO:0004672	protein kinase activity	0.00276571	AT5G58350,AT4G23260,AT4G23190,AT3G08720,AT2G30360,AT4G21390
GO:0051287	NAD binding	0.00297458	AT4G34200
GO:0004540	ribonuclease activity	0.00317881	AT5G22250
GO:0009695	jasmonic acid biosynthetic process	0.00321268	AT3G25780
GO:0010386	lateral root primordium development	0.00367377	AT5G05730
GO:0016298	lipase activity	0.00399042	AT1G53920
GO:0051555	flavonol biosynthetic process	0.00399556	AT5G54160
GO:0004707	MAP kinase activity	0.0040937	AT2G01450
GO:0010302	2-oxoglutarate-dependent dioxygenase activity	0.00423336	AT1G06620
GO:0008152	metabolic process	0.00460301	AT3G25610,AT4G22530,AT3G63380,AT1G55450,AT1G68620,AT3G46690,AT4G39230,AT5G13420,AT5G24760,AT3G54150,AT2G45290,AT5G06570,AT4G30190,AT1G08940,AT4G38540
GO:0006612	protein targeting to membrane	0.00505955	AT3G52400,AT3G11820
GO:0009790	embryonic development	0.00569448	AT4G02380
GO:0009793	embryonic development ending in seed dormancy	0.00700354	AT3G06350,AT1G48850
GO:0003779	actin binding	0.00742196	AT1G70140
GO:0006350	transcription	0.00818765	AT5G05140
GO:0006633	fatty acid biosynthetic process	0.00837989	AT1G64400
GO:0010107	potassium ion import	0.00877193	AT4G17615
GO:0043620	regulation of transcription in response to stress	0.00903615	AT5G13080
GO:0009620	response to fungus	0.00945043	AT1G51680,AT2G39660,AT3G10985,AT3G21240,AT3G11820
GO:0009908	flower development	0.00985464	AT1G19180
GO:0004370	glycerol kinase activity	0.0123164	AT1G80460
GO:0051245	negative regulation of cellular defense response	0.0142857	AT3G52400,AT3G11820
GO:0009813	flavonoid biosynthetic process	0.0143771	AT3G19010
GO:0045730	respiratory burst	0.0163494	AT5G64120
GO:0005529	sugar binding	0.0168243	AT5G03700,AT4G21390
GO:0007275	multicellular organismal development	0.0171317	AT1G52890
GO:0004674	protein serine/threonine kinase activity	0.0172583	AT2G02220,AT1G66830,AT1G09970,AT4G39270,AT1G74360
GO:0005522	profilin binding	0.0182418	AT1G70140
GO:0005886	plasma membrane	0.0187084	AT3G52400,AT4G17615,AT4G20830,AT1G15520,AT2G36380,AT3G25780,AT3G07390,AT2G39660,AT4G32650,AT2G39200,AT3G18830,AT1G61560,AT3G45290,AT4G30190,AT3G11820,AT2G25680
GO:0003700	transcription factor activity	0.0224336	AT5G13080,AT4G17500,AT3G01970,AT1G43160,AT4G24240,AT2G16720,AT4G01250,AT4G01720,AT1G80840,AT5G67450,AT2G28710,AT1G52890,AT2G23320,AT5G61890,AT2G38250,AT5G52830,AT4G31550,AT5G47220,AT5G07100,AT2G24570,AT4G39780,AT1G62300,AT3G50260
GO:0008171	O-methyltransferase activity	0.0265767	AT1G33030,AT4G34050,AT5G54160,AT1G21100
GO:0003824	catalytic activity	0.0300344	AT3G14050,AT4G20460,AT1G30620,AT3G06350,AT5G33290,AT2G39420,AT5G24760,AT1G64400,AT1G52760,AT1G08940,AT4G34200
GO:0009611	response to wounding	0.0330991	AT2G02220,AT3G13790,AT1G51680,AT2G38870,AT2G37040,AT5G05730,AT3G21240,AT1G71697,AT5G50200,AT5G43580
GO:0004103	choline kinase activity	0.0364876	AT1G71697
GO:0006457	protein folding	0.0417559	AT1G09080
GO:0009267	cellular response to starvation	0.0447761	AT3G49620
GO:0004497	monooxygenase activity	0.0476216	AT3G26830,AT4G38540
GO:0019200	carbohydrate kinase activity	0.0483687	AT1G80460
GO:0005313	L-glutamate transmembrane transporter activity	0.0526316	AT4G21120
GO:0043090	amino acid import	0.0540541	AT5G40780
GO:0005484	SNAP receptor activity	0.0559631	AT3G52400,AT3G11820
GO:0006412	translation	0.0561396	AT5G39785
GO:0001653	peptide receptor activity	0.0571429	AT2G02220
GO:0035252	UDP-xylosyltransferase activity	0.0572522	AT5G33290
GO:0006888	ER to Golgi vesicle-mediated transport	0.06	AT3G52190
GO:0006869	lipid transport	0.0644782	AT4G12470,AT4G12500,AT4G12490,AT4G12480,AT4G22470
GO:0015112	nitrate transmembrane transporter activity	0.0699301	AT5G50200,AT3G45060,AT1G08090
GO:0003735	structural constituent of ribosome	0.0715871	AT5G39785
GO:0048037	cofactor binding	0.0717095	AT4G34200
GO:0015189	L-lysine transmembrane transporter activity	0.0731707	AT4G21120
GO:0015181	arginine transmembrane transporter activity	0.0731707	AT4G21120
GO:0015692	lead ion transport	0.0743861	AT1G15520
GO:0016709	oxidoreductase activity, acting on paired donors, with incorporation or reduction of molecular oxygen, NADH or NADPH as one donor, and incorporation of one atom of oxygen	0.077302	AT4G31500
GO:0010295	(+)-abscisic acid 8'-hydroxylase activity	0.0782208	AT4G19230
GO:0051119	sugar transmembrane transporter activity	0.0784314	AT1G08930
GO:0009617	response to bacterium	0.0802235	AT1G80460,AT5G05730,AT3G26830,AT2G30750,AT4G39950
GO:0004553	hydrolase activity, hydrolyzing O-glycosyl compounds	0.0844144	AT3G13790,AT1G65610,AT4G16260,AT4G19810
GO:0048830	adventitious root development	0.0869565	AT4G31500
GO:0009863	salicylic acid mediated signaling pathway	0.0919584	AT3G52400,AT3G11820
GO:0009814	defense response, incompatible interaction	0.0954743	AT5G64890
GO:0031201	SNARE complex	0.1	AT3G11820
GO:0046777	protein amino acid autophosphorylation	0.105299	AT2G39660
GO:0009679	hexose:hydrogen symporter activity	0.109091	AT5G26340
GO:0019595	non-phosphorylated glucose catabolic process	0.111111	AT1G74030
GO:0015098	molybdate ion transmembrane transporter activity	0.125	AT2G25680
GO:0006874	cellular calcium ion homeostasis	0.128458	AT2G29100,AT5G48410,AT5G48400,AT3G04110
GO:0052542	callose deposition during defense response	0.138019	AT1G28380
GO:0009507	chloroplast	0.143638	AT3G14050,AT3G06350,AT1G48850,AT1G52200,AT5G44290,AT1G65390,AT2G27660,AT5G05730,AT1G25500,AT5G24760,AT2G45290,AT1G80450,AT3G22160,AT4G39950,AT2G35980,AT1G08050,AT1G61800,AT1G49000,AT2G15760,AT1G22410,AT1G74030,AT3G54640
GO:0015802	basic amino acid transport	0.146154	AT4G21120
GO:0006839	mitochondrial transport	0.149798	AT5G27520
GO:0015145	monosaccharide transmembrane transporter activity	0.152157	AT3G18830
GO:0005242	inward rectifier potassium channel activity	0.155172	AT4G32650
GO:0045010	actin nucleation	0.157895	AT1G70140
GO:0042742	defense response to bacterium	0.159412	AT4G23210,AT1G80460,AT1G80840,AT2G19190,AT4G31550,AT2G24570,AT1G19180
GO:0009867	jasmonic acid mediated signaling pathway	0.159487	AT3G52400,AT3G11820,AT1G19180
GO:0009268	response to pH	0.166667	AT2G30360
GO:0019563	glycerol catabolic process	0.166667	AT1G80460
GO:0047763	caffeate O-methyltransferase activity	0.166667	AT5G54160
GO:0002237	response to molecule of bacterial origin	0.166923	AT4G23210,AT1G80460
GO:0004564	beta-fructofuranosidase activity	0.170711	AT3G13790
GO:0052386	cell wall thickening	0.173913	AT1G19300
GO:0005950	anthranilate synthase complex	0.181818	AT5G05730
GO:0000015	phosphopyruvate hydratase complex	0.181818	AT1G74030
GO:0046983	protein dimerization activity	0.18314	AT1G21100
GO:0030145	manganese ion binding	0.1875	AT1G09560
GO:0006816	calcium ion transport	0.188363	AT3G63380
GO:0015085	calcium ion transmembrane transporter activity	0.194737	AT4G37640
GO:0019642	anaerobic glycolysis	0.195578	AT1G74030
GO:0003855	3-dehydroquinate dehydratase activity	0.2	AT3G06350
GO:0006952	defense response	0.201582	AT5G64905,AT1G22900,AT1G65390,AT5G45090,AT5G44910,AT2G37040,AT2G39200,AT5G06860,AT1G61560,AT5G51060,AT3G45290,AT3G11820,AT4G09420,AT2G32660,AT4G23280
GO:0042631	cellular response to water deprivation	0.201593	AT4G02380
GO:0045941	positive regulation of transcription	0.210165	AT5G47220
GO:0016563	transcription activator activity	0.214256	AT4G17500,AT5G47220
GO:0004888	transmembrane receptor activity	0.216758	AT5G44910,AT4G09420
GO:0005215	transporter activity	0.222885	AT3G23550,AT4G21680,AT5G46050,AT5G47730,AT4G36640
GO:0004683	calmodulin-dependent protein kinase activity	0.2291	AT3G20410
GO:0004764	shikimate 5-dehydrogenase activity	0.25	AT3G06350
GO:0045727	positive regulation of translation	0.25	AT3G08720
GO:0032442	phenylcoumaran benzylic ether reductase activity	0.25	AT4G39230
GO:0005388	calcium-transporting ATPase activity	0.258567	AT3G63380,AT4G37640
GO:0009641	shade avoidance	0.267477	AT4G31500
GO:0010053	root epidermal cell differentiation	0.269231	AT5G51060
GO:0045735	nutrient reservoir activity	0.270537	AT1G09560
GO:0000304	response to singlet oxygen	0.278355	AT1G61120
GO:0005261	cation channel activity	0.289899	AT3G04110
GO:0006605	protein targeting	0.297126	AT3G48570
GO:0009411	response to UV	0.297294	AT1G51680,AT3G21240
GO:0008194	UDP-glycosyltransferase activity	0.297831	AT3G50740,AT3G46690
GO:0004473	malate dehydrogenase (oxaloacetate-decarboxylating) (NADP+) activity	0.298246	AT5G11670
GO:0008553	hydrogen-exporting ATPase activity, phosphorylative mechanism	0.298246	AT4G30190
GO:0009058	biosynthetic process	0.305516	AT1G74000,AT2G36690
GO:0005451	monovalent cation:proton antiporter activity	0.307692	AT1G64170
GO:0006979	response to oxidative stress	0.30836	AT1G19020,AT4G23190,AT1G52200,AT4G20830,AT2G37040,AT5G44380,AT4G02380,AT5G64100,AT4G08770
GO:0000302	response to reactive oxygen species	0.308481	AT4G02380
GO:0030551	cyclic nucleotide binding	0.309796	AT4G32650
GO:0002213	defense response to insect	0.319667	AT1G61120
GO:0009873	ethylene mediated signaling pathway	0.331911	AT5G47220
GO:0009759	indole glucosinolate biosynthetic process	0.333333	AT4G31500
GO:0004470	malic enzyme activity	0.333333	AT5G11670
GO:0016036	cellular response to phosphate starvation	0.334237	AT3G52190
GO:0047262	polygalacturonate 4-alpha-galacturonosyltransferase activity	0.338567	AT1G19300
GO:0007264	small GTPase mediated signal transduction	0.342455	AT4G39890,AT4G18430,AT3G21700
GO:0009864	induced systemic resistance, jasmonic acid mediated signaling pathway	0.344537	AT5G47220
GO:0004712	protein serine/threonine/tyrosine kinase activity	0.34519	AT3G46930
GO:0019692	deoxyribose phosphate metabolic process	0.377778	AT2G45290
GO:0016564	transcription repressor activity	0.381477	AT5G67450
GO:0008270	zinc ion binding	0.394185	AT2G42360,AT1G63840,AT2G35910,AT5G27420,AT2G27660,AT5G24760,AT5G67450,AT2G42350,AT2G28710,AT1G08050
GO:0030003	cellular cation homeostasis	0.4	AT3G04110
GO:0005488	binding	0.406965	AT3G06350,AT5G24760,AT3G48850,AT2G03410,AT5G67340,AT5G47730,AT5G27520,AT4G34200
GO:0010200	response to chitin	0.414944	AT2G35930,AT3G16530,AT1G08930,AT1G80840,AT2G23320,AT2G24570,AT1G62300
GO:0016798	hydrolase activity, acting on glycosyl bonds	0.421202	AT5G15870
GO:0016787	hydrolase activity	0.422955	AT1G68620,AT5G06570,AT4G29700
GO:0004634	phosphopyruvate hydratase activity	0.428571	AT1G74030
GO:0004834	tryptophan synthase activity	0.428571	AT3G54640
GO:0004385	guanylate kinase activity	0.428571	AT3G57550
GO:0008643	carbohydrate transport	0.431155	AT3G47420,AT3G18830
GO:0005887	integral to plasma membrane	0.433483	AT5G51060
GO:0015914	phospholipid transport	0.436934	AT3G25610
GO:0009817	defense response to fungus, incompatible interaction	0.440306	AT2G39200,AT1G61560
GO:0019564	aerobic glycerol catabolic process	0.45	AT1G74030
GO:0009306	protein secretion	0.451811	AT4G12120
GO:0000145	exocyst	0.452381	AT3G55150,AT2G39380
GO:0016051	carbohydrate biosynthetic process	0.456253	AT1G19300
GO:0051607	defense response to virus	0.458569	AT2G35980
GO:0030001	metal ion transport	0.459426	AT2G36950
GO:0005507	copper ion binding	0.483516	AT2G44790
GO:0004866	endopeptidase inhibitor activity	0.5	AT1G17860
GO:0009060	aerobic respiration	0.5	AT5G51060
GO:0019567	arabinose biosynthetic process	0.5	AT1G30620
GO:0010188	response to microbial phytotoxin	0.5	AT1G80460
GO:0010363	regulation of plant-type hypersensitive response	0.5	AT3G52400,AT3G11820
GO:0010017	red or far red light signaling pathway	0.504903	AT4G25350
GO:0009832	plant-type cell wall biogenesis	0.527778	AT1G30620
GO:0016758	transferase activity, transferring hexosyl groups	0.555613	AT1G19300
GO:0009738	abscisic acid mediated signaling	0.556495	AT4G17615
GO:0009684	indoleacetic acid biosynthetic process	0.566434	AT4G39950,AT4G31500
GO:0016740	transferase activity	0.585894	AT5G42830
GO:0042538	hyperosmotic salinity response	0.586015	AT5G67450
GO:0007242	intracellular signaling cascade	0.594964	AT2G42060
GO:0005743	mitochondrial inner membrane	0.602996	AT3G48850,AT5G27520
GO:0015116	sulfate transmembrane transporter activity	0.611111	AT2G25680
GO:0015326	cationic amino acid transmembrane transporter activity	0.612536	AT4G21120
GO:0009409	response to cold	0.619684	AT4G17615,AT5G67450,AT4G34150,AT1G09560,AT4G02380,AT3G08720
GO:0005576	extracellular region	0.624009	AT3G07390
GO:0042545	cell wall modification	0.629221	AT2G47550,AT2G45220,AT3G43270
GO:0005744	mitochondrial inner membrane presequence translocase complex	0.64	AT1G20350
GO:0004617	phosphoglycerate dehydrogenase activity	0.642857	AT4G34200
GO:0009414	response to water deprivation	0.643495	AT2G35930,AT4G17615,AT1G52890,AT1G53310
GO:0006537	glutamate biosynthetic process	0.666667	AT5G38710
GO:0006562	proline catabolic process	0.666667	AT5G38710
GO:0043069	negative regulation of programmed cell death	0.666667	AT3G52400,AT3G11820
GO:0004867	serine-type endopeptidase inhibitor activity	0.666667	AT2G38870,AT5G43580
GO:0005509	calcium ion binding	0.668431	AT3G49370,AT4G17615,AT5G24430,AT4G16350,AT4G20780,AT3G01830
GO:0016887	ATPase activity	0.673913	AT4G30190
GO:0006098	pentose-phosphate shunt	0.68	AT5G13420
GO:0048046	apoplast	0.684435	AT1G09560
GO:0009737	response to abscisic acid stimulus	0.690035	AT4G21410,AT1G63840,AT4G23260,AT5G27420,AT3G26830,AT2G16720,AT3G11820
GO:0000151	ubiquitin ligase complex	0.691824	AT5G61560,AT5G67340
GO:0009416	response to light stimulus	0.693415	AT2G29100,AT3G49620,AT5G48410,AT5G48400,AT3G04110
GO:0009651	response to salt stress	0.696648	AT4G17615,AT1G28380,AT2G16720,AT3G08720
GO:0009851	auxin biosynthetic process	0.708333	AT5G05730
GO:0004356	glutamate-ammonia ligase activity	0.714286	AT5G37600,AT3G53180
GO:0010114	response to red light	0.717934	AT4G31500
GO:0005643	nuclear pore	0.71875	AT4G17500
GO:0030528	transcription regulator activity	0.724975	AT5G05140
GO:0004345	glucose-6-phosphate dehydrogenase activity	0.730769	AT5G40760
GO:0019303	D-ribose catabolic process	0.730769	AT2G45290
GO:0005515	protein binding	0.730868	AT3G55150,AT2G42360,AT5G05140,AT1G63840,AT2G39380,AT2G35910,AT5G27420,AT4G39890,AT5G06860,AT2G42350,AT1G08050,AT5G37580,AT1G19180,AT2G32660
GO:0009408	response to heat	0.739267	AT1G09080,AT3G08720
GO:0045548	phenylalanine ammonia-lyase activity	0.75	AT2G37040
GO:0015031	protein transport	0.761811	AT4G39890,AT4G18430,AT1G20350
GO:0006094	gluconeogenesis	0.764706	AT1G74030
GO:0005986	sucrose biosynthetic process	0.764706	AT5G51830
GO:0016757	transferase activity, transferring glycosyl groups	0.766841	AT3G50740,AT3G46690,AT1G19300
GO:0010120	camalexin biosynthetic process	0.777778	AT3G26830,AT4G39950
GO:0015385	sodium:hydrogen antiporter activity	0.785714	AT1G64170
GO:0009723	response to ethylene stimulus	0.786511	AT1G15520,AT5G05730,AT2G16720
GO:0009753	response to jasmonic acid stimulus	0.799552	AT1G70700,AT5G13220,AT1G72450,AT1G61120,AT1G15520,AT2G16720,AT5G55120,AT1G17380,AT1G19180,AT1G74950
GO:0010417	glucuronoxylan biosynthetic process	0.8	AT1G19300
GO:0009639	response to red or far red light	0.800131	AT4G19230
GO:0016491	oxidoreductase activity	0.809771	AT3G49620,AT5G24760
GO:0031348	negative regulation of defense response	0.810526	AT3G11820
GO:0000166	nucleotide binding	0.814842	AT1G49450,AT3G52190
GO:0005834	heterotrimeric G-protein complex	0.816327	AT5G42010
GO:0019654	acetate fermentation	0.818182	AT5G51830,AT1G74030
GO:0015198	oligopeptide transporter activity	0.818182	AT5G55930,AT1G65730
GO:0008121	ubiquinol-cytochrome-c reductase activity	0.818182	AT5G25450
GO:0006886	intracellular protein transport	0.81901	AT3G52400,AT3G48570,AT3G11820
GO:0009505	plant-type cell wall	0.828057	AT4G20830,AT1G74000,AT2G47550,AT5G06860,AT2G45220,AT3G43270
GO:0006970	response to osmotic stress	0.83149	AT4G17615
GO:0016621	cinnamoyl-CoA reductase activity	0.833333	AT5G14700
GO:0048366	leaf development	0.836677	AT1G19300,AT1G07630,AT2G28890
GO:0009624	response to nematode	0.839519	AT4G32650
GO:0003677	DNA binding	0.839633	AT5G05140,AT4G17500,AT1G43160,AT2G16720,AT5G67450,AT5G61890,AT5G47220,AT4G39780,AT3G50260
GO:0031225	anchored to membrane	0.843353	AT3G07390,AT3G51330,AT2G44790,AT2G17760,AT1G65240
GO:0010193	response to ozone	0.846154	AT5G55120
GO:0009816	defense response to bacterium, incompatible interaction	0.854553	AT4G23190
GO:0006096	glycolysis	0.857143	AT1G74030
GO:0009061	anaerobic respiration	0.866667	AT1G74030
GO:0006904	vesicle docking during exocytosis	0.875	AT3G55150,AT2G39380
GO:0009739	response to gibberellin stimulus	0.875	AT2G16720
GO:0051707	response to other organism	0.893333	AT2G35980
GO:0004842	ubiquitin-protein ligase activity	0.895171	AT2G35930,AT2G42360,AT1G08050,AT5G67340
GO:0007165	signal transduction	0.900736	AT5G42010,AT5G06860,AT3G20410,AT2G01450,AT2G32660
GO:0006808	regulation of nitrogen utilization	0.909091	AT4G39230
GO:0003676	nucleic acid binding	0.910812	AT5G67450,AT2G28710
GO:0009693	ethylene biosynthetic process	0.916667	AT1G05010
GO:0046686	response to cadmium ion	0.918367	AT2G16720
GO:0009751	response to salicylic acid stimulus	0.91895	AT1G15520,AT2G16720,AT1G80840
GO:0016021	integral to membrane	0.919509	AT3G25610,AT1G64170,AT4G25350,AT3G62150,AT3G47420,AT1G61800,AT3G45060,AT1G05300
GO:0005783	endoplasmic reticulum	0.930305	AT3G51440,AT3G02875,AT3G26830,AT4G32650,AT4G37640,AT1G19300,AT3G52190,AT4G31500
GO:0015171	amino acid transmembrane transporter activity	0.944444	AT5G40780
GO:0042626	ATPase activity, coupled to transmembrane movement of substances	0.946429	AT1G15520,AT3G62150,AT2G36380
GO:0009733	response to auxin stimulus	0.948387	AT3G07390
GO:0005840	ribosome	0.95082	AT5G39785
GO:0005634	nucleus	0.952597	AT1G72450,AT5G58350,AT5G05140,AT5G13080,AT3G01970,AT4G25350,AT1G43160,AT4G24240,AT5G54160,AT2G39660,AT4G01250,AT4G01720,AT1G80840,AT5G67450,AT2G23320,AT5G61890,AT5G52830,AT4G31550,AT3G08720,AT5G47220,AT5G07100,AT5G22250,AT2G24570,AT4G39780,AT1G62300,AT1G19180,AT3G50260
GO:0005794	Golgi apparatus	0.967349	AT1G30620,AT5G33290
GO:0005739	mitochondrion	0.980536	AT5G25450,AT5G13420,AT5G37580,AT1G74360,AT4G31500,AT4G34200
GO:0045449	regulation of transcription	0.987934	AT2G28710,AT2G38250
GO:0019139	cytokinin dehydrogenase activity	1	AT4G29740
GO:0010118	stomatal movement	1	AT4G17615
GO:0005737	cytoplasm	1	AT1G69930,AT5G58350,AT3G06350,AT5G54160,AT2G37040,AT2G39660,AT3G14060,AT2G29460
GO:0004656	procollagen-proline 4-dioxygenase activity	1	AT3G06300
GO:0009821	alkaloid biosynthetic process	1	AT3G51440,AT3G51450
GO:0031347	regulation of defense response	1	AT1G80840
GO:0009607	response to biotic stimulus	1	AT1G15520
GO:0006006	glucose metabolic process	1	AT5G40760
GO:0006499	N-terminal protein myristoylation	1	AT3G49370,AT5G64120,AT4G17615,AT5G44290,AT5G24430,AT2G39660,AT5G39580,AT3G53180,AT3G20410,AT1G07630,AT2G28890
GO:0006817	phosphate transport	1	AT3G52190
GO:0006014	D-ribose metabolic process	1	AT5G51830
GO:0008150	biological_process	1	AT1G49450,AT1G65690,AT2G18690,AT3G43250,AT1G15670,AT5G53110,AT5G42830,AT5G67210,AT2G20320,AT4G19370,AT5G08240,AT1G19020,AT5G60630,AT1G17860,AT3G47380,AT3G55470,AT4G23010,AT1G52200,AT5G12930,AT2G39210,AT2G20010,AT2G27310,AT5G38900,AT3G21080,AT1G30135,AT2G16900,AT3G46280,AT1G25500,AT5G05190,AT1G80450,AT3G22160,AT1G05575,AT5G12340,AT1G67920,AT1G65500,AT4G20000,AT3G49210,AT1G51920,AT1G32690,AT3G14060…
GO:0008565	protein transporter activity	1	AT4G12120
GO:0008202	steroid metabolic process	1	AT5G02100
GO:0015576	sorbitol transmembrane transporter activity	1	AT3G18830
GO:0005730	nucleolus	1	AT2G39660
GO:0009052	pentose-phosphate shunt, non-oxidative branch	1	AT5G13420,AT2G45290
GO:0006810	transport	1	AT3G25610,AT3G63380,AT3G62150,AT3G18830,AT1G16370,AT4G37640,AT3G48850,AT4G30190,AT5G47730,AT3G45060,AT5G27520,AT4G36640
GO:0016310	phosphorylation	1	AT5G26340
GO:0004657	proline dehydrogenase activity	1	AT5G38710
GO:0005911	cell-cell junction	1	AT1G70140
GO:0019683	glyceraldehyde-3-phosphate catabolic process	1	AT1G74030
GO:0009407	toxin catabolic process	1	AT1G69930,AT2G29460
GO:0006855	multidrug transport	1	AT1G15520,AT3G23550
GO:0005788	endoplasmic reticulum lumen	1	AT1G09080
GO:0005355	glucose transmembrane transporter activity	1	AT3G18830
GO:0045489	pectin biosynthetic process	1	AT5G33290
GO:0006950	response to stress	1	AT5G61560,AT3G10985
GO:0006099	tricarboxylic acid cycle	1	AT1G53310
GO:0008283	cell proliferation	1	AT3G49780,AT5G58650
GO:0005829	cytosol	1	AT5G37600,AT2G35930,AT1G33030,AT4G25350,AT4G34050,AT5G54160,AT5G40760,AT5G03630,AT1G21100
GO:0046910	pectinesterase inhibitor activity	1	AT3G47380
GO:0016998	cell wall catabolic process	1	AT4G01700,AT5G62150,AT1G02360,AT2G43590
GO:0006955	immune response	1	AT1G29690
GO:0016020	membrane	1	AT3G25610,AT3G63380,AT5G33290,AT4G21120,AT2G29100,AT4G23190,AT5G55930,AT1G44800,AT5G48410,AT1G08930,AT3G18830,AT5G26340,AT1G16370,AT3G48570,AT3G23550,AT4G21680,AT5G46050,AT2G39530,AT1G61800,AT5G48400,AT5G40780,AT3G04110,AT5G35735,AT1G05300,AT1G08090
GO:0010197	polar nucleus fusion	1	AT4G33050
GO:0008142	oxysterol binding	1	AT5G02100
GO:0010398	xylogalacturonan metabolic process	1	AT5G33290
GO:0015297	antiporter activity	1	AT3G23550,AT1G61800
GO:0006122	mitochondrial electron transport, ubiquinol to cytochrome c	1	AT5G25450
GO:0005792	microsome	1	AT3G26830
GO:0018401	peptidyl-proline hydroxylation to 4-hydroxy-L-proline	1	AT2G17720,AT3G06300
GO:0010167	response to nitrate	1	AT5G50200,AT1G08090
GO:0030198	extracellular matrix organization and biogenesis	1	AT3G07390
GO:0005789	endoplasmic reticulum membrane	1	AT4G37640
GO:0010051	xylem and phloem pattern formation	1	AT1G19300
GO:0019575	sucrose catabolic process, using beta-fructofuranosidase	1	AT5G51830
GO:0009567	double fertilization forming a zygote and endosperm	1	AT5G02100
GO:0015706	nitrate transport	1	AT5G50200,AT1G08090
GO:0005575	cellular_component	1	AT1G49450,AT3G43250,AT1G70700,AT5G13220,AT5G14700,AT3G21230,AT5G64890,AT1G15670,AT4G22530,AT5G42830,AT5G67210,AT1G26410,AT2G20320,AT5G08240,AT1G19020,AT1G51680,AT2G38870,AT1G61120,AT1G65610,AT5G64905,AT1G68620,AT3G55470,AT4G23010,AT5G58940,AT2G39210,AT1G28380,AT1G80460,AT2G42060,AT3G46930,AT1G28390,AT2G27310,AT5G24230,AT4G39230,AT1G30110,AT5G38900,AT1G29690,AT3G21080,AT1G30135,AT5G11670,AT3G10985…
GO:0004081	bis(5'-nucleosyl)-tetraphosphatase (asymmetrical) activity	1	AT1G30110
GO:0015689	molybdate ion transport	1	AT2G25680
GO:0043091	L-arginine import	1	AT4G21120
GO:0005618	cell wall	1	AT5G64120,AT3G14060,AT4G02330
GO:0009700	indole phytoalexin biosynthetic process	1	AT3G26830
GO:0008168	methyltransferase activity	1	AT4G22530,AT1G55450,AT3G54150,AT1G21100
GO:0019853	L-ascorbic acid biosynthetic process	1	AT5G55120
GO:0030154	cell differentiation	1	AT3G49780
GO:0019650	glucose catabolic process to butanediol	1	AT1G74030
GO:0005750	mitochondrial respiratory chain complex III	1	AT5G25450
GO:0042128	nitrate assimilation	1	AT5G37600
GO:0019656	glucose catabolic process to D-lactate and ethanol	1	AT1G74030
GO:0004801	transaldolase activity	1	AT5G13420
GO:0015992	proton transport	1	AT3G63380,AT4G30190
GO:0008219	cell death	1	AT1G29690,AT2G39200,AT1G61560,AT3G45290
GO:0051938	L-glutamate import	1	AT4G21120
GO:0046872	metal ion binding	1	AT1G09560,AT2G36950
GO:0008324	cation transmembrane transporter activity	1	AT1G05300
GO:0006118	electron transport	1	AT5G25450,AT2G44790,AT5G03630
GO:0015591	D-ribose transmembrane transporter activity	1	AT3G18830
GO:0015144	carbohydrate transmembrane transporter activity	1	AT1G08930,AT3G18830,AT5G26340,AT1G16370
GO:0005622	intracellular	1	AT4G18430,AT2G28710,AT3G21700,AT4G36640,AT5G39785
GO:0004802	transketolase activity	1	AT2G45290
GO:0005524	ATP binding	1	AT2G02220,AT1G66830,AT1G09970,AT1G09080,AT4G39270,AT1G74360,AT4G09420
GO:0010337	regulation of salicylic acid metabolic process	1	AT1G28380
GO:0007169	transmembrane receptor protein tyrosine kinase signaling pathway	1	AT2G02220,AT1G66830,AT1G09970,AT4G39270,AT1G74360
GO:0050373	UDP-arabinose 4-epimerase activity	1	AT1G30620
GO:0032107	regulation of response to nutrient levels	1	AT5G13080
GO:0009815	1-aminocyclopropane-1-carboxylate oxidase activity	1	AT1G05010
GO:0010102	lateral root morphogenesis	1	AT3G07390
GO:0031012	extracellular matrix	1	AT3G49780
GO:0009850	auxin metabolic process	1	AT3G02875,AT1G44350
GO:0016844	strictosidine synthase activity	1	AT3G51440,AT3G51450,AT1G74000
GO:0031224	intrinsic to membrane	1	AT1G65390,AT5G45090,AT5G44910,AT4G09420
GO:0019648	formaldehyde assimilation via xylulose monophosphate cycle	1	AT2G45290
GO:0046873	metal ion transmembrane transporter activity	1	AT1G05300
GO:0004107	chorismate synthase activity	1	AT1G48850
GO:0019722	calcium-mediated signaling	1	AT4G17615,AT4G16350
GO:0006865	amino acid transport	1	AT5G40780
GO:0008131	amine oxidase activity	1	AT4G29740
GO:0015152	glucose-6-phosphate transmembrane transporter activity	1	AT1G61800
GO:0005358	high-affinity hydrogen:glucose symporter activity	1	AT5G26340
GO:0015575	mannitol transmembrane transporter activity	1	AT3G18830
GO:0015662	ATPase activity, coupled to transmembrane movement of ions, phosphorylative mechanism	1	AT3G25610
GO:0016207	4-coumarate-CoA ligase activity	1	AT3G21230,AT1G51680,AT3G21240
GO:0015712	hexose phosphate transport	1	AT1G61800
GO:0016597	amino acid binding	1	AT4G34200
GO:0009687	abscisic acid metabolic process	1	AT4G19230
GO:0005365	myo-inositol transmembrane transporter activity	1	AT3G18830
GO:0009051	pentose-phosphate shunt, oxidative branch	1	AT5G40760,AT5G11670
GO:0009117	nucleotide metabolic process	1	AT3G57550,AT4G29700
GO:0006015	5-phosphoribose 1-diphosphate biosynthetic process	1	AT5G13420,AT2G45290
GO:0004871	signal transducer activity	1	AT5G42010
GO:0005354	galactose transmembrane transporter activity	1	AT3G18830
GO:0019658	glucose catabolic process to lactate and acetate	1	AT5G13420,AT2G45290,AT1G74030
GO:0009744	response to sucrose stimulus	1	AT3G49620
GO:0048544	recognition or rejection of self pollen	1	AT1G61360,AT1G61380,AT1G61370,AT4G21390
GO:0050691	regulation of defense response to virus by host	1	AT1G80840
GO:0015148	D-xylose transmembrane transporter activity	1	AT3G18830
GO:0003674	molecular_function	1	AT1G65690,AT2G18690,AT3G43250,AT1G70700,AT5G13220,AT5G64890,AT1G15670,AT5G53110,AT1G72450,AT2G20320,AT4G19370,AT5G08240,AT1G19020,AT5G60630,AT5G64905,AT3G55470,AT4G23010,AT1G22900,AT1G52200,AT4G25350,AT1G44800,AT2G39210,AT1G28380,AT2G20010,AT2G27310,AT3G21080,AT1G30135,AT3G10985,AT2G16900,AT3G46280,AT1G25500,AT5G05190,AT1G80450,AT3G22160,AT1G05575,AT5G12340,AT1G67920,AT1G65500,AT4G20000,AT3G49210…
GO:0015969	guanosine tetraphosphate metabolic process	1	AT3G14050
GO:0015168	glycerol transmembrane transporter activity	1	AT3G18830
GO:0016616	oxidoreductase activity, acting on the CH-OH group of donors, NAD or NADP as acceptor	1	AT4G34200
GO:0008964	phosphoenolpyruvate carboxylase activity	1	AT1G53310
GO:0005525	GTP binding	1	AT4G39890,AT4G18430,AT3G21700
GO:0016174	NAD(P)H oxidase activity	1	AT5G51060
GO:0006944	membrane fusion	1	AT3G52400,AT3G11820
GO:0012505	endomembrane system	1	AT1G51890,AT2G18690,AT4G12470,AT2G02220,AT5G20050,AT4G20460,AT5G53110,AT4G21410,AT3G13790,AT5G36220,AT4G19370,AT5G60630,AT4G23210,AT2G29100,AT1G63840,AT5G01560,AT1G17860,AT4G23260,AT3G47380,AT1G61360,AT5G25930,AT5G46080,AT1G22900,AT1G26380,AT3G26210,AT4G28350,AT1G51820,AT5G27420,AT5G48410,AT3G51450,AT5G03610,AT3G16530,AT1G51800,AT2G43620,AT4G16350,AT4G29740,AT3G59700,AT5G15730,AT4G39890,AT4G20860…
GO:0005351	sugar:hydrogen symporter activity	1	AT3G47420,AT1G08930,AT3G18830,AT5G26340,AT1G16370
GO:0006108	malate metabolic process	1	AT5G11670
GO:0048838	release of seed from dormancy	1	AT4G19230
GO:0005217	intracellular ligand-gated ion channel activity	1	AT2G29100,AT5G48410,AT5G48400,AT3G04110

## Sheet: Denoux GO terms Induced
Term ID	Description	PCI PVAL	Genes Having GO Term
GO:0006468	protein amino acid phosphorylation	7.84767e-197	AT5G35370,AT5G20050,AT1G35710,AT4G04960,AT4G23200,AT5G15730,AT1G66830,AT4G25390,AT1G35670,AT2G31880,AT3G13380,AT3G09830,AT1G14370,AT1G61400,AT4G27300,AT1G57700,AT1G30640,AT5G14640,AT1G51850,AT1G66880,AT1G51790,AT4G32300,AT2G17220,AT1G51620,AT3G29160,AT1G16260,AT4G18700,AT2G33580,AT4G18250,AT5G58940,AT5G46330,AT5G20480,AT1G64300,AT5G25440,AT1G77280,AT2G28940,AT3G54030,AT1G29750,AT4G21380,AT1G34420…
GO:0006457	protein folding	3.39493e-40	AT3G62600,AT3G44110,AT5G18750,AT4G24190,AT3G08970,AT3G12580,AT5G49910,AT1G09080,AT1G08450,AT3G14200,AT1G56300,AT5G48570,AT5G03030,AT4G21180,AT5G56030,AT1G76700,AT4G17070,AT4G28480,AT2G20560,AT5G12030,AT5G03160,AT5G22060,AT5G61790,AT1G68370,AT1G71000,AT5G07340,AT3G09440,AT5G02490
GO:0016301	kinase activity	5.78007e-39	AT5G35370,AT5G20050,AT4G04960,AT2G15080,AT3G05370,AT4G29810,AT3G11080,AT3G05660,AT5G15730,AT1G66830,AT4G25390,AT1G35670,AT2G19190,AT2G31880,AT3G09830,AT1G14370,AT1G61400,AT4G27300,AT1G57700,AT1G30640,AT1G30270,AT1G51850,AT1G51790,AT4G32300,AT2G17220,AT1G51620,AT1G16260,AT2G25440,AT4G18700,AT4G23190,AT2G33580,AT4G18250,AT5G58940,AT5G46330,AT5G20480,AT1G64300,AT5G25440,AT1G77280,AT2G28940,AT3G54030…
GO:0006508	proteolysis	1.89336e-37	AT2G39710,AT4G25110,AT4G29330,AT1G32960,AT1G44130,AT5G48430,AT1G32940,AT1G24140,AT3G02875,AT5G54140,AT1G70170,AT1G02170,AT1G66180,AT1G16420,AT5G37540,AT3G51330,AT1G44350,AT2G24200,AT3G59080,AT5G24260,AT3G57460,AT1G49050,AT3G47060,AT4G24160,AT2G17760,AT1G65240,AT3G12700
GO:0004364	glutathione transferase activity	1.29949e-33	AT2G47730,AT1G65820,AT2G30870,AT2G29480,AT2G29470,AT1G74590,AT1G02940,AT1G17170,AT2G29490,AT3G09270,AT1G69930,AT2G29440,AT1G10370,AT2G29460,AT1G27130
GO:0007275	multicellular organismal development	1.52993e-33	AT1G56010,AT1G69490,AT3G49530,AT5G39610,AT5G55610,AT1G02220,AT3G04070,AT3G10500,AT2G17040,AT1G77450,AT1G01010,AT5G63790,AT1G01720,AT1G52890,AT5G24590,AT5G22290,AT2G43000,AT1G34180
GO:0005975	carbohydrate metabolic process	7.98441e-33	AT1G10050,AT3G09920,AT2G16790,AT1G61820,AT4G30280,AT4G19810,AT3G04010,AT4G16260,AT5G11920,AT1G67070,AT1G61810,AT1G76130,AT1G65610,AT5G24090,AT1G80460,AT5G13420,AT1G35580,AT2G27500,AT3G55430,AT4G25810,AT1G02460,AT5G09730
GO:0004722	protein serine/threonine phosphatase activity	1.60212e-29	AT1G07630,AT1G18480,AT5G10740,AT1G69960,AT4G28400,AT1G34750,AT1G22280,AT2G33700,AT3G51370,AT5G27840,AT1G07160,AT4G33920,AT2G40180,AT3G55050,AT3G05580,AT2G20630,AT3G62260,AT1G48040,AT2G28890,AT5G06750
GO:0006629	lipid metabolic process	9.48897e-24	AT2G26560,AT2G30550,AT3G48080,AT1G53920,AT1G30370,AT5G03610,AT5G14930,AT3G52430,AT3G48090,AT1G29670,AT5G24210,AT2G05260,AT1G02660
GO:0016567	protein ubiquitination	1.72293e-20	AT3G54850,AT4G36550,AT1G67530,AT1G29340,AT2G45920,AT3G07370,AT2G35930,AT5G61560,AT2G44680,AT1G76390,AT5G67340
GO:0016706	oxidoreductase activity, acting on paired donors, with incorporation or reduction of molecular oxygen, 2-oxoglutarate as one donor, and incorporation of one atom each of oxygen into both donors	2.24662e-16	AT3G28480,AT5G20400,AT4G33910,AT3G13610,AT3G06300,AT2G36690,AT2G17720
GO:0000162	tryptophan biosynthetic process	2.76804e-16	AT5G05730,AT4G31500,AT5G17990,AT5G38530,AT3G57880,AT3G54640,AT2G04400
GO:0009695	jasmonic acid biosynthetic process	3.48971e-16	AT1G20510,AT2G06050,AT1G55020,AT3G25780,AT1G17420,AT1G72520
GO:0009793	embryonic development ending in seed dormancy	1.24495e-14	AT1G48850,AT4G23570,AT4G34710,AT2G47470,AT4G11850,AT2G46140,AT3G07780,AT2G21470,AT2G22250,AT1G07890,AT3G19580,AT3G06350
GO:0016847	1-aminocyclopropane-1-carboxylate synthase activity	4.84052e-12	AT4G11280,AT1G01480,AT4G37770,AT4G26200
GO:0009225	nucleotide-sugar metabolic process	5.9673e-12	AT2G28760,AT1G30620,AT4G12250,AT5G44480,AT4G20460
GO:0016671	oxidoreductase activity, acting on sulfur group of donors, disulfide as acceptor	1.52186e-11	AT1G72280,AT1G45145,AT2G38960,AT3G51030
GO:0004630	phospholipase D activity	2.47259e-11	AT2G42010,AT4G11840,AT4G11850,AT4G00240
GO:0007568	aging	2.62349e-11	AT2G29350,AT3G49620,AT1G67070,AT5G14930,AT2G23810
GO:0009073	aromatic amino acid family biosynthetic process	4.16433e-11	AT4G39980,AT1G48850,AT1G22410,AT5G66120
GO:0009908	flower development	7.18435e-11	AT1G69490,AT5G56030,AT1G01040,AT1G19180,AT5G08335
GO:0006470	protein amino acid dephosphorylation	9.87798e-11	AT5G10740,AT2G33700,AT5G27840,AT1G07160,AT2G40180,AT1G48040
GO:0009887	organ morphogenesis	1.49998e-10	AT4G34460,AT2G22860,AT5G65870,AT3G49780
GO:0010150	leaf senescence	2.08474e-10	AT2G38860,AT1G69490,AT3G52430,AT5G51640
GO:0010374	stomatal complex development	3.6888e-10	AT1G51660,AT3G21220,AT3G45640
GO:0004437	inositol or phosphatidylinositol phosphatase activity	5.96845e-10	AT5G63980,AT5G64000,AT5G04540,AT5G63990
GO:0006520	amino acid metabolic process	9.06457e-10	AT1G64660,AT3G09920,AT5G07440,AT1G35580
GO:0006412	translation	1.63067e-09	AT3G57490,AT1G29970,AT2G39390,AT5G39850,AT5G39785,AT1G80750,AT1G66580
GO:0006839	mitochondrial transport	1.79863e-09	AT1G07030,AT5G48970,AT5G01340,AT2G47490,AT5G27520,AT1G14560,AT4G32400,AT5G15640,AT2G22500,AT4G24570
GO:0009644	response to high light intensity	3.20615e-09	AT1G27730,AT2G29500,AT3G12580,AT2G47180,AT1G74310,AT2G26150,AT5G12030,AT4G12400,AT2G46240,AT1G54050,AT2G41430,AT2G17840
GO:0006396	RNA processing	1.19852e-08	AT3G49130,AT3G52120,AT1G01040,AT5G55100
GO:0006790	sulfur metabolic process	1.47199e-08	AT5G63980,AT5G64000,AT5G63990
GO:0006800	oxygen and reactive oxygen species metabolic process	1.9123e-08	AT4G34460,AT1G64060,AT5G47910
GO:0008483	transaminase activity	5.55459e-08	AT3G24090,AT2G24850,AT2G20610
GO:0006569	tryptophan catabolic process	9.91396e-08	AT2G22330,AT4G39950
GO:0010178	IAA-amino acid conjugate hydrolase activity	1.43482e-07	AT5G54140,AT1G44350
GO:0008792	arginine decarboxylase activity	1.51906e-07	AT2G16500,AT4G34710
GO:0009823	cytokinin catabolic process	2.99951e-07	AT1G75450,AT4G29740
GO:0000165	MAPKKK cascade	4.06614e-07	AT4G29810,AT1G51660,AT4G26070,AT4G08500
GO:0005516	calmodulin binding	4.23889e-07	AT1G22070,AT3G22910,AT2G26190,AT2G17480,AT3G21070,AT3G45290,AT5G10030,AT5G17330,AT5G26920,AT4G24240,AT5G48570,AT2G39200,AT5G62570,AT5G04020,AT4G31550,AT2G15760,AT1G01340,AT5G62070,AT3G17700,AT5G64220,AT4G37640,AT4G33050,AT1G27770,AT2G22300,AT3G57330,AT3G16940,AT2G46240,AT1G61560,AT3G63380,AT5G57580,AT3G25230,AT1G13210,AT4G01010,AT1G11310,AT2G23320,AT3G52870,AT2G41010,AT2G24570
GO:0009973	adenylyl-sulfate reductase activity	4.2678e-07	AT1G62180,AT4G04610
GO:0003849	3-deoxy-7-phosphoheptulonate synthase activity	4.49257e-07	AT4G39980,AT1G22410
GO:0030246	carbohydrate binding	5.65389e-07	AT5G35370,AT1G61400,AT4G27300,AT4G32300,AT2G02350,AT1G61370,AT3G16530,AT2G02230,AT1G61490,AT1G61380,AT1G61360,AT1G61420,AT5G45090,AT4G29050,AT1G11330,AT5G60900,AT4G28350,AT1G65390,AT3G53000,AT1G53060,AT1G34300
GO:0006556	S-adenosylmethionine biosynthetic process	5.96696e-07	AT1G02500,AT2G36880
GO:0019496	serine-isocitrate lyase pathway	5.99634e-07	AT1G74030,AT4G26970
GO:0008113	peptide-methionine-(S)-S-oxide reductase activity	6.446e-07	AT5G07460,AT4G04800,AT4G21850
GO:0006857	oligopeptide transport	7.14181e-07	AT1G59740,AT1G65730,AT5G53550,AT4G27730,AT5G46050,AT5G01180,AT4G21680
GO:0016652	oxidoreductase activity, acting on NADH or NADPH, NAD or NADP as acceptor	8.53106e-07	AT5G11670,AT4G00570
GO:0004478	methionine adenosyltransferase activity	8.98023e-07	AT1G02500,AT2G36880
GO:0006564	L-serine biosynthetic process	9.90514e-07	AT4G35630,AT1G17745
GO:0005515	protein binding	1.59993e-06	AT1G09530,AT1G31540,AT5G45060,AT3G44110,AT4G26090,AT2G15080,AT3G44400,AT3G05370,AT3G05200,AT3G54220,AT5G22690,AT3G11080,AT3G05660,AT1G76410,AT4G14220,AT4G11370,AT4G23570,AT3G12360,AT4G40070,AT3G13380,AT1G63750,AT5G48655,AT1G22070,AT1G30270,AT3G03000,AT4G36150,AT4G03510,AT1G07000,AT5G47050,AT1G63350,AT5G01980,AT5G20910,AT4G11170,AT5G01450,AT1G14260,AT3G07040,AT3G29160,AT1G50640,AT5G27600,AT2G25440…
GO:0009809	lignin biosynthetic process	2.20303e-06	AT2G40890,AT4G34230,AT5G48930,AT3G19450,AT1G76470,AT1G15950,AT4G36220,AT5G54160,AT2G33600,AT1G80820,AT1G33030,AT1G67980,AT5G14700
GO:0016656	monodehydroascorbate reductase (NADH) activity	2.55568e-06	AT3G09940,AT5G03630
GO:0048527	lateral root development	2.67637e-06	AT1G56010,AT5G45710,AT5G13080
GO:0019538	protein metabolic process	2.79954e-06	AT5G57710,AT3G24530
GO:0003743	translation initiation factor activity	3.11028e-06	AT1G77840,AT4G01090,AT1G13020
GO:0009451	RNA modification	3.55635e-06	AT5G22250,AT3G44260
GO:0004568	chitinase activity	3.67832e-06	AT2G43620,AT2G43610,AT1G02360,AT4G01700,AT3G54420,AT2G43570,AT3G47540,AT2G43590
GO:0016791	phosphatase activity	3.9748e-06	AT5G46410,AT5G04540
GO:0009561	megagametogenesis	4.44538e-06	AT4G14220,AT4G34200
GO:0009699	phenylpropanoid biosynthetic process	4.62335e-06	AT2G40890,AT2G30490,AT2G37040,AT3G24503,AT3G21230,AT4G36220,AT3G53260
GO:0006350	transcription	4.99822e-06	AT5G05140,AT5G23710,AT3G24500
GO:0006465	signal peptide processing	6.1315e-06	AT3G05230,AT5G27430
GO:0010015	root morphogenesis	7.76525e-06	AT1G31930,AT4G34390
GO:0051287	NAD binding	8.04593e-06	AT4G34200,AT4G12720
GO:0043687	post-translational protein modification	8.79028e-06	AT2G22890,AT3G15355
GO:0010228	vegetative to reproductive phase transition	9.61253e-06	AT2G46240,AT1G01040
GO:0010154	fruit development	1.11924e-05	AT4G34460,AT2G28350
GO:0006139	nucleobase, nucleoside, nucleotide and nucleic acid metabolic process	1.19499e-05	AT2G47680,AT3G01820
GO:0050660	FAD binding	1.32621e-05	AT1G72280,AT2G38960
GO:0045543	gibberellin 2-beta-dioxygenase activity	1.51505e-05	AT1G02400,AT1G30040
GO:0004683	calmodulin-dependent protein kinase activity	1.6548e-05	AT1G35670,AT4G21940,AT5G66210,AT5G04870,AT3G20410,AT4G09570,AT1G76040,AT3G57530,AT1G18890,AT1G74740,AT2G17290,AT5G12480
GO:0004723	calcium-dependent protein serine/threonine phosphatase activity	2.47898e-05	AT5G24430,AT5G24270,AT3G49370
GO:0009790	embryonic development	3.10249e-05	AT4G02380,AT4G20140
GO:0004069	aspartate transaminase activity	3.10896e-05	AT5G19550,AT2G22250
GO:0006464	protein modification process	3.70611e-05	AT5G07460,AT3G26980
GO:0004721	phosphoprotein phosphatase activity	3.8017e-05	AT3G02800,AT1G05000
GO:0010149	senescence	3.82165e-05	AT1G71190,AT5G51640
GO:0006467	protein thiol-disulfide exchange	5.06735e-05	AT1G72280,AT2G38960
GO:0015979	photosynthesis	6.57339e-05	AT1G27730,AT3G54110
GO:0006891	intra-Golgi vesicle-mediated transport	8.25294e-05	AT1G76970,AT1G21380,AT5G50440
GO:0003700	transcription factor activity	0.000105082	AT1G09530,AT1G66230,AT5G52510,AT1G27730,AT5G05410,AT3G54220,AT3G06590,AT2G16720,AT2G31230,AT2G18350,AT5G59820,AT5G47230,AT1G80840,AT5G15130,AT1G56010,AT4G17490,AT2G40950,AT1G22070,AT3G16500,AT3G25730,AT1G69490,AT1G68840,AT5G49520,AT1G10585,AT3G49530,AT4G22070,AT4G39780,AT3G02150,AT5G58620,AT1G50640,AT3G46600,AT5G39610,AT4G17500,AT1G28370,AT3G01970,AT5G04340,AT5G66320,AT4G12020,AT5G10030,AT1G05710…
GO:0030163	protein catabolic process	0.000136411	AT2G41110,AT3G47060
GO:0009873	ethylene mediated signaling pathway	0.000179982	AT2G31230,AT5G47230,AT4G17490,AT1G28370,AT5G25190,AT1G72360,AT1G64060,AT3G23240,AT3G24500
GO:0006915	apoptosis	0.000198728	AT4G12020,AT1G29340,AT5G42570,AT2G46240,AT5G47120,AT3G07190
GO:0006633	fatty acid biosynthetic process	0.000204221	AT1G64400,AT4G23850
GO:0019900	kinase binding	0.00021978	AT4G08500
GO:0018344	protein geranylgeranylation	0.000221239	AT2G39550
GO:0006401	RNA catabolic process	0.000222618	AT5G63980
GO:0043335	protein unfolding	0.000222717	AT1G74310
GO:0004698	calcium-dependent protein kinase C activity	0.000230362	AT3G57530
GO:0008194	UDP-glycosyltransferase activity	0.000247789	AT1G22340,AT1G24100,AT3G11340,AT1G07240,AT1G22400,AT2G15480,AT5G03490,AT5G12890,AT1G05680,AT3G46690,AT3G53160,AT3G55700,AT1G06000,AT2G30140,AT4G15550,AT2G15490,AT3G53150,AT3G21780
GO:0009838	abscission	0.000248942	AT1G68765
GO:0047251	thiohydroximate beta-D-glucosyltransferase activity	0.000259538	AT1G24100
GO:0017017	MAP kinase tyrosine/serine/threonine phosphatase activity	0.000265041	AT3G55270
GO:0008061	chitin binding	0.000267165	AT3G04720
GO:0010298	dihydrocamalexic acid decarboxylase activity	0.000275634	AT3G26830
GO:0018826	methionine gamma-lyase activity	0.000275862	AT1G64660
GO:0047720	indoleacetaldoxime dehydratase activity	0.000275938	AT2G30770
GO:0005886	plasma membrane	0.000387553	AT5G47100,AT4G26090,AT2G38290,AT3G12360,AT5G61900,AT2G43610,AT4G14630,AT5G04930,AT1G30270,AT5G24030,AT3G07040,AT2G17480,AT1G15520,AT3G07390,AT4G13510,AT5G61210,AT3G45290,AT4G27970,AT4G08850,AT4G20830,AT1G06840,AT4G33430,AT4G32650,AT2G39200,AT1G22280,AT5G07910,AT4G30190,AT1G16150,AT3G02880,AT3G28450,AT4G11850,AT4G25900,AT1G74790,AT5G06320,AT3G52400,AT4G17615,AT1G59870,AT3G21630,AT2G32670,AT2G39660…
GO:0015691	cadmium ion transport	0.000416642	AT1G59870,AT2G04040
GO:0000719	photoreactive repair	0.000440529	AT5G18070
GO:0004672	protein kinase activity	0.000441773	AT4G23200,AT3G13380,AT1G30640,AT5G14640,AT3G29160,AT4G23190,AT1G17240,AT1G34420,AT4G21390,AT4G23270,AT1G56145,AT3G08720,AT3G57760,AT4G14350,AT4G11470,AT2G19130,AT1G63500,AT4G09570,AT1G74330,AT4G23260,AT2G30360,AT5G58350,AT5G48380,AT3G14840,AT2G32850,AT5G35410,AT1G18890,AT1G74740,AT1G17230,AT4G24400,AT5G63410,AT3G45640,AT4G00970,AT2G32800
GO:0009257	10-formyltetrahydrofolate biosynthetic process	0.000446927	AT4G24380
GO:0019499	cyanide metabolic process	0.000447027	AT5G22300
GO:0010492	maintenance of shoot apical meristem identity	0.000497389	AT3G07780
GO:0048482	ovule morphogenesis	0.000497389	AT1G19270
GO:0048317	seed morphogenesis	0.000497389	AT1G19270
GO:0015036	disulfide oxidoreductase activity	0.000533476	AT4G05020
GO:0016655	oxidoreductase activity, acting on NADH or NADPH, quinone or similar compound as acceptor	0.000533476	AT5G54500
GO:0050661	NADP binding	0.000541712	AT3G06350
GO:0003975	UDP-N-acetylglucosamine-dolichyl-phosphate N-acetylglucosaminephosphotransferase activity	0.000546747	AT2G41490
GO:0004351	glutamate decarboxylase activity	0.000551116	AT5G17330
GO:0004425	indole-3-glycerol-phosphate synthase activity	0.000551268	AT2G04400
GO:0009000	selenocysteine lyase activity	0.00055142	AT1G16540
GO:0046423	allene-oxide cyclase activity	0.000553403	AT3G25780
GO:0019948	SUMO activating enzyme activity	0.00055371	AT2G21470
GO:0020037	heme binding	0.000572684	AT3G48890,AT2G46650
GO:0035279	gene silencing by miRNA, mRNA cleavage	0.000654165	AT1G01040
GO:0009690	cytokinin metabolic process	0.000670991	AT1G66340
GO:0010078	maintenance of root meristem identity	0.000745898	AT3G07780
GO:0004601	peroxidase activity	0.000800595	AT5G05340,AT4G08770,AT5G39580,AT1G14540,AT5G19890,AT1G33660,AT5G64120,AT4G08780,AT4G36430,AT5G64100
GO:0010211	IAA-Leu conjugate hydrolase activity	0.000803213	AT3G02875
GO:0010210	IAA-Phe conjugate hydrolase activity	0.000803213	AT3G02875
GO:0004609	phosphatidylserine decarboxylase activity	0.000826446	AT5G57190
GO:0004737	pyruvate decarboxylase activity	0.000826446	AT5G17380
GO:0008686	3,4-dihydroxy-2-butanone-4-phosphate synthase activity	0.000827358	AT5G64300
GO:0004325	ferrochelatase activity	0.000827358	AT5G26030
GO:0004049	anthranilate synthase activity	0.000827586	AT5G05730
GO:0010325	raffinose family oligosaccharide biosynthetic process	0.000845309	AT3G63010
GO:0018348	protein amino acid geranylgeranylation	0.000884467	AT2G39550
GO:0000723	telomere maintenance	0.00089067	AT5G13820
GO:0009396	folic acid and derivative biosynthetic process	0.000893855	AT4G24380
GO:0009653	anatomical structure morphogenesis	0.000995025	AT3G27010
GO:0055046	microgametogenesis	0.000995025	AT4G14220
GO:0019825	oxygen binding	0.00100065	AT4G37310,AT5G67310,AT4G31500,AT3G53280,AT2G27690,AT5G57220,AT1G13110,AT2G24180,AT2G22330,AT2G30770,AT1G17060,AT2G30750,AT3G26230,AT3G26210,AT2G34500,AT4G37370,AT3G26830,AT2G45570,AT5G45340,AT4G00360,AT4G39950,AT1G13080
GO:0010294	abscisic acid glucosyltransferase activity	0.00103815	AT3G21780
GO:0009086	methionine biosynthetic process	0.00111161	AT3G25900
GO:0048528	post-embryonic root development	0.00124254	AT5G03730
GO:0004604	phosphoadenylyl-sulfate reductase (thioredoxin) activity	0.00133085	AT1G62180
GO:0003954	NADH dehydrogenase activity	0.00133262	AT2G29990
GO:0010227	floral organ abscission	0.00149254	AT1G68765
GO:0043812	phosphatidylinositol-4-phosphate phosphatase activity	0.00159278	AT3G51460
GO:0006952	defense response	0.00163708	AT1G31540,AT5G45060,AT1G72920,AT4G26090,AT2G15080,AT3G44400,AT3G05370,AT3G13650,AT5G22690,AT3G11080,AT5G44910,AT3G05660,AT2G47730,AT4G23570,AT5G51060,AT1G63750,AT4G36150,AT1G63350,AT4G11170,AT3G07040,AT2G17480,AT5G13320,AT1G22900,AT1G53350,AT1G66090,AT2G43510,AT1G57630,AT2G37040,AT5G44870,AT3G50950,AT5G11250,AT1G33590,AT2G32680,AT3G45290,AT4G12020,AT5G64905,AT5G45000,AT2G34930,AT2G39200,AT4G39030…
GO:0004838	tyrosine transaminase activity	0.00163711	AT2G24850
GO:0048446	petal morphogenesis	0.00173482	AT1G59640
GO:0006749	glutathione metabolic process	0.00178551	AT3G24170
GO:0009611	response to wounding	0.00185028	AT4G39980,AT3G13790,AT2G38870,AT1G27730,AT2G06050,AT5G05730,AT5G59820,AT4G11280,AT4G34710,AT2G30490,AT2G37040,AT3G61190,AT1G55020,AT1G74020,AT2G02220,AT1G51680,AT5G43580,AT1G71697,AT3G53260,AT1G64280,AT2G02860,AT5G63770,AT5G20230,AT5G64900,AT1G17420,AT4G26070,AT1G01720,AT1G72300,AT5G50200,AT3G25230,AT2G24850,AT4G08500,AT1G72520,AT3G21240
GO:0007389	pattern specification process	0.00198807	AT2G28350
GO:0004648	phosphoserine transaminase activity	0.00218192	AT4G35630
GO:0009555	pollen development	0.00219727	AT1G19180
GO:0006751	glutathione catabolic process	0.00223065	AT4G39640
GO:0006750	glutathione biosynthetic process	0.00223065	AT5G27380
GO:0019253	reductive pentose-phosphate cycle	0.00232313	AT2G45290
GO:0004888	transmembrane receptor activity	0.00236924	AT1G31540,AT5G45060,AT1G72920,AT3G44400,AT5G22690,AT5G44910,AT1G63750,AT4G36150,AT4G11170,AT1G66090,AT1G57630,AT5G44870,AT5G11250,AT5G45000,AT4G36140,AT4G12010,AT3G04220,AT4G09420,AT3G44630,AT1G72900,AT1G63740,AT5G46520,AT5G36930,AT5G17890,AT1G72300,AT5G58120
GO:0008299	isoprenoid biosynthetic process	0.00237889	AT1G79690
GO:0008195	phosphatidate phosphatase activity	0.00239425	AT2G01180
GO:0009553	embryo sac development	0.00243962	AT1G61140
GO:0009880	embryonic pattern specification	0.00248077	AT1G01040
GO:0009738	abscisic acid mediated signaling	0.00279385	AT2G28350,AT5G63980,AT4G17615,AT3G57530,AT1G64060,AT1G18890,AT1G74740,AT1G69270,AT2G17290,AT3G45640
GO:0009646	response to absence of light	0.00328947	AT5G20230,AT2G41100
GO:0030497	fatty acid elongation	0.00343163	AT1G01120
GO:0010262	somatic embryogenesis	0.00353274	AT3G54420
GO:0008266	poly(U) binding	0.00361272	AT3G01640
GO:0004806	triacylglycerol lipase activity	0.00363638	AT2G30550,AT3G48080,AT1G30370,AT5G14930,AT3G52430,AT3G48090,AT5G24210,AT2G05260,AT1G02660
GO:0015035	protein disulfide oxidoreductase activity	0.00372439	AT5G38900
GO:0045324	late endosome to vacuole transport	0.00401606	AT5G16830
GO:0009845	seed germination	0.00421209	AT3G54810
GO:0045431	flavonol synthase activity	0.00423672	AT3G19010
GO:0006298	mismatch repair	0.00439415	AT5G58720
GO:0048444	floral organ morphogenesis	0.00445654	AT3G63010
GO:0042991	transcription factor import into nucleus	0.00453515	AT5G53290
GO:0006284	base-excision repair	0.00527066	AT3G12040
GO:0006260	DNA replication	0.00576113	AT2G06510
GO:0016925	protein sumoylation	0.00660936	AT2G21470
GO:0016485	protein processing	0.00660936	AT2G44180
GO:0010025	wax biosynthetic process	0.00685002	AT1G01120
GO:0009698	phenylpropanoid metabolic process	0.00714635	AT1G20510,AT4G30210,AT1G51680,AT3G21240
GO:0004725	protein tyrosine phosphatase activity	0.0074113	AT5G04540
GO:0010107	potassium ion import	0.00758347	AT5G47100,AT1G30270,AT4G17615
GO:0010302	2-oxoglutarate-dependent dioxygenase activity	0.00845326	AT1G06620
GO:0008171	O-methyltransferase activity	0.00923491	AT1G21130,AT5G54160,AT1G33030,AT1G21120,AT4G34050,AT1G21100
GO:0006487	protein amino acid N-linked glycosylation	0.00962794	AT1G30000
GO:0030041	actin filament polymerization	0.00980472	AT5G54650,AT1G24150
GO:0008083	growth factor activity	0.0107685	AT2G22860,AT5G65870,AT3G49780
GO:0008320	protein transmembrane transporter activity	0.0107984	AT3G07680,AT1G26690,AT1G21900
GO:0004674	protein serine/threonine kinase activity	0.010889	AT1G35710,AT1G66830,AT2G31880,AT1G30270,AT1G66880,AT5G46330,AT5G20480,AT1G29750,AT5G58150,AT1G06840,AT4G33430,AT2G24130,AT2G02220,AT3G02880,AT3G28450,AT3G47570,AT4G39270,AT1G63500,AT5G41180,AT1G07570,AT1G73080,AT5G01950,AT1G72300,AT5G03730,AT2G44680,AT5G38210,AT5G63410,AT1G09970,AT4G20140,AT1G74360
GO:0009643	photosynthetic acclimation	0.010989	AT5G59820
GO:0006281	DNA repair	0.0110205	AT3G26680
GO:0040007	growth	0.0117487	AT5G60410,AT1G55020,AT1G17420,AT1G72520
GO:0010386	lateral root primordium development	0.0122039	AT5G05730
GO:0010498	proteasomal protein catabolic process	0.0122724	AT4G14220
GO:0005388	calcium-transporting ATPase activity	0.0139337	AT3G22910,AT4G37640,AT1G27770,AT3G57330,AT4G00900,AT3G63380
GO:0003993	acid phosphatase activity	0.0158225	AT5G51260
GO:0006355	regulation of transcription, DNA-dependent	0.0163396	AT1G66230,AT5G05410,AT2G16720,AT2G31230,AT5G47230,AT4G18430,AT1G80840,AT5G15130,AT4G17490,AT2G40950,AT3G25730,AT1G68840,AT5G49520,AT4G22070,AT4G39780,AT1G50640,AT4G17500,AT1G28370,AT3G01970,AT5G66320,AT4G12020,AT1G62300,AT2G28350,AT2G46400,AT1G43160,AT1G18570,AT4G24240,AT1G42990,AT3G57390,AT2G33710,AT4G31550,AT3G50260,AT3G16870,AT2G30250,AT1G16640,AT1G18860,AT1G67970,AT4G31800,AT5G45750,AT4G18170…
GO:0010476	gibberellin-mediated signaling	0.0166667	AT3G63010
GO:0006890	retrograde vesicle-mediated transport, Golgi to ER	0.0172414	AT2G34840
GO:0006486	protein amino acid glycosylation	0.0177239	AT1G05170
GO:0051603	proteolysis involved in cellular protein catabolic process	0.0177323	AT2G22010
GO:0004708	MAP kinase kinase activity	0.0177345	AT4G29810,AT1G51660,AT4G26070,AT3G21220
GO:0015559	multidrug efflux pump activity	0.0178006	AT4G39030,AT2G04040
GO:0006874	cellular calcium ion homeostasis	0.0185927	AT2G29120,AT5G48400,AT2G29100,AT5G11210,AT5G48410,AT2G29110,AT3G04110
GO:0009734	auxin mediated signaling pathway	0.0197023	AT1G56010,AT2G28350,AT1G16540,AT5G20990
GO:0006896	Golgi to vacuole transport	0.0198413	AT5G16830
GO:0005743	mitochondrial inner membrane	0.0213809	AT1G07030,AT5G48970,AT3G54110,AT5G01340,AT2G47490,AT5G27520,AT1G14560,AT4G32400,AT5G15640,AT2G22500,AT5G13490,AT3G48850,AT4G24570,AT5G01500
GO:0004497	monooxygenase activity	0.0224872	AT2G40890,AT4G36220,AT1G12200,AT3G26830,AT4G38540,AT5G54830
GO:0004564	beta-fructofuranosidase activity	0.0229114	AT3G13790,AT3G06500,AT1G35580,AT1G22650
GO:0005484	SNAP receptor activity	0.0236904	AT5G16830,AT5G61210,AT3G52400,AT4G02195,AT3G11820,AT3G05710,AT5G50440
GO:0009306	protein secretion	0.0256829	AT2G17980,AT4G24190,AT1G12360,AT1G29310,AT2G34250,AT4G12120
GO:0004020	adenylylsulfate kinase activity	0.0272342	AT2G14750,AT4G39940
GO:0008080	N-acetyltransferase activity	0.0273618	AT2G32030,AT2G32020,AT5G16800
GO:0048825	cotyledon development	0.0278792	AT5G53290
GO:0009055	electron carrier activity	0.0295519	AT1G26380,AT5G44380,AT1G72280,AT4G20830,AT1G30700,AT4G20860,AT4G10040,AT5G44390,AT1G26390,AT1G26420,AT1G26410,AT5G53560,AT1G60420,AT2G38960
GO:0015145	monosaccharide transmembrane transporter activity	0.0352941	AT3G19930,AT3G18830
GO:0008152	metabolic process	0.0361629	AT5G03290,AT1G22340,AT3G02360,AT2G17130,AT2G41380,AT4G22780,AT3G11340,AT3G22910,AT5G04930,AT1G07240,AT3G05170,AT3G25610,AT2G32030,AT1G08940,AT2G47130,AT1G75020,AT1G65520,AT5G14310,AT1G55450,AT1G22400,AT3G55410,AT4G11840,AT4G30190,AT5G10830,AT5G41670,AT5G52810,AT1G68620,AT1G78050,AT1G26130,AT5G03490,AT1G27770,AT5G12890,AT5G07440,AT1G05680,AT3G46690,AT4G39230,AT5G13420,AT3G55700,AT3G57330,AT3G01640…
GO:0010421	hydrogen peroxide-mediated programmed cell death	0.037037	AT3G13610
GO:0004644	phosphoribosylglycinamide formyltransferase activity	0.0392157	AT1G31220
GO:0042539	hypotonic salinity response	0.0392857	AT5G24270,AT4G01370
GO:0016298	lipase activity	0.0394294	AT2G26560,AT3G48080,AT1G53920,AT3G52430,AT3G48090
GO:0050832	defense response to fungus	0.0402672	AT2G38870,AT1G80840,AT4G34460,AT2G43510,AT1G74710,AT2G30770,AT4G33430,AT2G34930,AT5G39580,AT1G45145,AT4G31800,AT3G52400,AT2G25000,AT4G12490,AT2G39660,AT1G64280,AT3G11820,AT5G64120,AT2G46240,AT2G40140,AT5G25910,AT4G12470,AT2G38470,AT2G35000
GO:0000145	exocyst	0.042236	AT1G07000,AT5G50380,AT4G02350,AT3G09520,AT5G59730,AT2G39380,AT5G58430,AT5G61010,AT3G55150,AT3G29400
GO:0009922	fatty acid elongase activity	0.0444444	AT1G01120
GO:0016564	transcription repressor activity	0.0455437	AT1G27730,AT1G50640,AT1G28370,AT5G43170,AT5G67450,AT3G15210,AT3G19580
GO:0015165	pyrimidine nucleotide sugar transmembrane transporter activity	0.0455874	AT2G02810,AT1G14360
GO:0051555	flavonol biosynthetic process	0.0473108	AT5G54160,AT1G06000
GO:0016757	transferase activity, transferring glycosyl groups	0.0474773	AT1G22340,AT1G24100,AT1G80290,AT1G05170,AT1G07240,AT1G73740,AT5G16910,AT1G22400,AT3G09020,AT2G15480,AT2G44660,AT4G00300,AT3G50760,AT5G03490,AT5G12890,AT1G05680,AT3G46690,AT3G53160,AT4G19460,AT3G55700,AT1G06000,AT3G11420,AT1G14070,AT2G15390,AT2G30140,AT1G78800,AT1G78280,AT4G15550,AT2G20370,AT4G27480,AT5G59070,AT2G18700,AT4G11350,AT2G35710,AT2G15490,AT3G21780
GO:0032491	detection of molecule of fungal origin	0.047619	AT3G21630
GO:0005548	phospholipid transporter activity	0.047619	AT3G12740,AT1G59820
GO:0030599	pectinesterase activity	0.0512516	AT2G26440,AT2G45220,AT4G02330,AT1G23200,AT2G47550,AT3G10720
GO:0005887	integral to plasma membrane	0.0513024	AT1G30900,AT5G51060,AT4G20110,AT2G01180,AT1G64060,AT3G19930
GO:0005215	transporter activity	0.0520986	AT5G52450,AT5G13750,AT1G59740,AT5G24030,AT4G36640,AT3G23550,AT4G27970,AT5G47730,AT3G47780,AT4G39030,AT4G21560,AT3G24840,AT1G14560,AT4G23030,AT4G32400,AT5G02270,AT1G58340,AT1G75170,AT4G01660,AT4G08690,AT1G66780,AT2G40090,AT5G46050,AT5G10820,AT5G54860,AT5G01180,AT2G04040,AT5G01500,AT4G21680,AT1G11890,AT2G21520
GO:0009807	lignan biosynthetic process	0.052923	AT3G13650,AT1G55210,AT1G65870
GO:0009617	response to bacterium	0.053143	AT4G39980,AT5G05730,AT3G15352,AT3G28930,AT4G37990,AT3G12580,AT1G74710,AT2G30770,AT2G30750,AT3G28940,AT5G06320,AT1G80460,AT3G26830,AT1G64280,AT4G39950,AT2G41430,AT5G02490
GO:0051015	actin filament binding	0.056371	AT1G21980,AT1G70140
GO:0002237	response to molecule of bacterial origin	0.057221	AT4G23210,AT1G80460,AT3G25070,AT4G26070
GO:0016740	transferase activity	0.0584077	AT1G28680,AT5G48930,AT5G39050,AT3G09020,AT5G61160,AT2G39980,AT5G01210,AT2G17570,AT5G42830,AT5G39090
GO:0006605	protein targeting	0.0584905	AT4G30600,AT3G48570,AT4G24920,AT5G50460
GO:0009408	response to heat	0.0586904	AT3G46230,AT5G51440,AT5G05410,AT5G59820,AT2G29500,AT3G12580,AT5G49910,AT1G09080,AT2G47180,AT3G61190,AT1G74310,AT5G56030,AT3G08720,AT5G45710,AT2G26150,AT1G66340,AT1G16540,AT5G12030,AT1G53540,AT1G64280,AT4G12400,AT5G12020,AT5G52640,AT2G46240,AT5G47910,AT1G07890,AT1G54050,AT3G24500,AT3G09440,AT5G02490
GO:0005242	inward rectifier potassium channel activity	0.0598911	AT4G32650,AT2G26650
GO:0006888	ER to Golgi vesicle-mediated transport	0.06	AT3G52190
GO:0045735	nutrient reservoir activity	0.0626802	AT2G26560,AT4G14630,AT1G09560,AT1G23040,AT4G24350
GO:0004809	tRNA (guanine-N2-)-methyltransferase activity	0.0638298	AT3G02320
GO:0016045	detection of bacterium	0.0673617	AT4G26090,AT5G46330,AT5G20480
GO:0004675	transmembrane receptor protein serine/threonine kinase activity	0.0677556	AT4G18250,AT5G46330,AT4G21380
GO:0016308	1-phosphatidylinositol-4-phosphate 5-kinase activity	0.0683268	AT3G09920,AT1G34260,AT1G21980,AT1G10900
GO:0015914	phospholipid transport	0.0697178	AT5G04930,AT3G25610,AT1G26130,AT1G13210
GO:0009903	chloroplast avoidance movement	0.0697674	AT1G66480
GO:0010200	response to chitin	0.0699523	AT1G27730,AT2G31230,AT5G59820,AT1G80840,AT1G08930,AT1G62300,AT2G46400,AT3G16530,AT1G42990,AT2G33710,AT1G04100,AT2G37430,AT2G26150,AT1G64380,AT3G21630,AT1G51700,AT5G25910,AT2G35930,AT2G38470,AT2G35000,AT1G66160,AT3G45640,AT2G23320,AT2G24570,AT1G34180
GO:0015189	L-lysine transmembrane transporter activity	0.0731707	AT4G21120
GO:0015181	arginine transmembrane transporter activity	0.0731707	AT4G21120
GO:0015802	basic amino acid transport	0.0736842	AT1G77380,AT4G21120
GO:0005451	monovalent cation:proton antiporter activity	0.0769231	AT4G23700,AT1G64170
GO:0016742	hydroxymethyl-, formyl- and related transferase activity	0.0784314	AT1G31220
GO:0005249	voltage-gated potassium channel activity	0.0784314	AT2G24240
GO:0015824	proline transport	0.0789474	AT3G55740
GO:0030130	clathrin coat of trans-Golgi network vesicle	0.0833333	AT3G51890
GO:0006816	calcium ion transport	0.084345	AT3G22910,AT1G27770,AT3G57330,AT4G00900,AT3G63380
GO:0008265	Mo-molybdopterin cofactor sulfurase activity	0.0870265	AT5G44720,AT1G16540
GO:0046777	protein amino acid autophosphorylation	0.0877832	AT3G29160,AT2G39660
GO:0016772	transferase activity, transferring phosphorus-containing groups	0.0884435	AT2G14750,AT4G39940
GO:0004470	malic enzyme activity	0.0909091	AT5G11670,AT4G00570
GO:0010188	response to microbial phytotoxin	0.0909091	AT1G45145,AT1G80460,AT5G49570
GO:0016758	transferase activity, transferring hexosyl groups	0.0930905	AT3G28340,AT1G05170,AT2G47180,AT1G22400,AT3G50760,AT5G03490,AT1G05680,AT2G30140,AT2G35710
GO:0000325	plant-type vacuole	0.0933333	AT4G14630,AT3G03000
GO:0005680	anaphase-promoting complex	0.0967742	AT4G05410
GO:0009828	plant-type cell wall loosening	0.0971323	AT4G17030,AT1G26770
GO:0046345	abscisic acid catabolic process	0.1	AT5G45340,AT3G21780
GO:0017111	nucleoside-triphosphatase activity	0.103149	AT1G31540,AT5G45060,AT3G44400,AT1G63750,AT1G03905,AT4G11170,AT1G66090,AT4G36140,AT3G04220,AT3G44630,AT1G63740,AT5G46520,AT5G58120,AT5G04720
GO:0009862	systemic acquired resistance, salicylic acid mediated signaling pathway	0.10529	AT1G22070,AT1G64280,AT3G52430,AT3G48090,AT4G01370
GO:0006612	protein targeting to membrane	0.107448	AT3G52400,AT3G11820
GO:0019595	non-phosphorylated glucose catabolic process	0.111111	AT1G74030
GO:0030551	cyclic nucleotide binding	0.112901	AT4G32650,AT1G01340,AT3G17700,AT2G26650,AT4G01010
GO:0042542	response to hydrogen peroxide	0.112969	AT5G05410,AT2G29500,AT3G12580,AT2G47180,AT1G74310,AT2G26150,AT5G12030,AT4G12400,AT2G46240,AT4G26070,AT1G54050
GO:0043620	regulation of transcription in response to stress	0.11747	AT5G13080
GO:0004042	amino-acid N-acetyltransferase activity	0.118415	AT4G37670
GO:0051707	response to other organism	0.119045	AT3G13100,AT5G61210,AT2G15480,AT2G35980,AT3G51660,AT3G53160,AT3G50480,AT4G36010,AT3G52430,AT3G54950,AT4G36430,AT2G15490,AT3G02840
GO:0048768	root hair cell tip growth	0.126891	AT3G51460
GO:0035264	multicellular organism growth	0.12702	AT1G27730
GO:0048573	photoperiodism, flowering	0.127451	AT2G44680
GO:0009399	nitrogen fixation	0.129299	AT3G53180
GO:0045730	respiratory burst	0.129451	AT5G64120
GO:0010204	defense response signaling pathway, resistance gene-independent	0.129498	AT5G20480,AT3G25070,AT3G05360,AT2G15040
GO:0046424	ferulate 5-hydroxylase activity	0.130677	AT4G36220
GO:0046409	p-coumarate 3-hydroxylase activity	0.130712	AT2G40890
GO:0009640	photomorphogenesis	0.130962	AT5G48150
GO:0016710	trans-cinnamate 4-monooxygenase activity	0.131069	AT2G30490
GO:0005201	extracellular matrix structural constituent	0.131162	AT3G07390
GO:0005212	structural constituent of eye lens	0.131162	AT5G52810
GO:0008987	quinolinate synthetase A activity	0.131892	AT5G50210
GO:0004143	diacylglycerol kinase activity	0.132525	AT2G20900,AT4G30340,AT5G63770
GO:0051670	inulinase activity	0.133246	AT5G11920
GO:0015239	multidrug transporter activity	0.133543	AT2G04040
GO:0048830	adventitious root development	0.134093	AT4G31500,AT2G20610
GO:0043090	amino acid import	0.135135	AT5G40780
GO:0016763	transferase activity, transferring pentosyl groups	0.135241	AT2G40570
GO:0047210	alpha-1,4-glucan-protein synthase (UDP-forming) activity	0.135822	AT5G16510
GO:0008417	fucosyltransferase activity	0.13837	AT1G14070,AT2G15390
GO:0003950	NAD+ ADP-ribosyltransferase activity	0.138764	AT1G23550,AT2G35510
GO:0019177	dihydroneopterin triphosphate pyrophosphohydrolase activity	0.142857	AT1G68760
GO:0004834	tryptophan synthase activity	0.142857	AT5G38530,AT3G54640
GO:0017110	nucleoside-diphosphatase activity	0.142857	AT4G12720
GO:0005529	sugar binding	0.14386	AT5G03700,AT4G21390,AT5G18470
GO:0008092	cytoskeletal protein binding	0.144176	AT1G68370
GO:0005522	profilin binding	0.144176	AT1G70140
GO:0009270	response to humidity	0.153846	AT5G61900
GO:0045736	negative regulation of cyclin-dependent protein kinase activity	0.153846	AT3G24810
GO:0016563	transcription activator activity	0.155039	AT5G05410,AT2G31230,AT5G47230,AT2G40950,AT4G17500,AT1G64280,AT4G23810,AT3G23240,AT1G01720
GO:0009737	response to abscisic acid stimulus	0.156112	AT3G51920,AT1G27730,AT2G16720,AT3G28210,AT3G26090,AT4G34710,AT1G18570,AT3G02140,AT2G46270,AT1G55020,AT4G21410,AT1G66340,AT4G09460,AT3G22060,AT1G31930,AT3G26830,AT5G62470,AT4G34390,AT3G11820,AT2G32020,AT5G01540,AT4G23260,AT3G07370,AT5G27420,AT3G24500,AT4G01370,AT3G15210,AT3G19580,AT2G39550,AT5G51640,AT3G21780,AT1G01560
GO:0004370	glycerol kinase activity	0.165324	AT1G80460
GO:0042736	NADH kinase activity	0.165324	AT3G21070
GO:0004168	dolichol kinase activity	0.165324	AT3G45040
GO:0016307	phosphatidylinositol phosphate kinase activity	0.165406	AT1G21980
GO:0009058	biosynthetic process	0.165746	AT1G74000,AT1G73740,AT1G31220,AT2G04650,AT4G15130,AT4G19460,AT1G78800,AT2G36690,AT1G74010,AT5G59070,AT2G35710,AT2G24850
GO:0010482	regulation of epidermal cell division	0.166667	AT2G22475
GO:0043069	negative regulation of programmed cell death	0.166667	AT3G52400,AT3G11820,AT1G64060,AT5G47910,AT5G47120
GO:0004866	endopeptidase inhibitor activity	0.166667	AT1G73260,AT1G17860
GO:0047769	arogenate dehydratase activity	0.166667	AT1G08250,AT2G27820,AT3G44720
GO:0004664	prephenate dehydratase activity	0.166667	AT1G08250,AT2G27820,AT3G44720
GO:0045010	actin nucleation	0.168956	AT1G70140,AT5G54650
GO:0009152	purine ribonucleotide biosynthetic process	0.172414	AT1G31220
GO:0010225	response to UV-C	0.173077	AT3G55270
GO:0004707	MAP kinase activity	0.17434	AT2G01450,AT4G11330,AT4G01370,AT3G45640,AT1G01560
GO:0016246	RNA interference	0.178571	AT5G61780
GO:0006972	hyperosmotic response	0.180734	AT5G12030,AT4G01370
GO:0009871	jasmonic acid and ethylene-dependent systemic resistance, ethylene mediated signaling pathway	0.181406	AT1G66340
GO:0042753	positive regulation of circadian rhythm	0.181818	AT2G44680
GO:0004553	hydrolase activity, hydrolyzing O-glycosyl compounds	0.183109	AT3G13790,AT1G10050,AT1G61820,AT2G44490,AT4G19810,AT3G04010,AT4G16260,AT5G11920,AT1G61810,AT1G65610,AT5G24090,AT2G27500,AT3G55430,AT5G09730
GO:0009723	response to ethylene stimulus	0.185987	AT5G05730,AT2G16720,AT1G56010,AT1G68765,AT4G11280,AT1G15520,AT1G05710,AT1G18570,AT3G04720,AT4G09460,AT1G31930,AT5G62470,AT3G23250,AT5G64900,AT1G64060,AT3G24500,AT5G03730,AT3G15210,AT5G51640
GO:0015112	nitrate transmembrane transporter activity	0.192308	AT3G45060,AT5G50200
GO:0004765	shikimate kinase activity	0.193357	AT5G47050,AT2G16790
GO:0051119	sugar transmembrane transporter activity	0.196078	AT1G08930
GO:0015690	aluminum ion transport	0.197452	AT5G20230
GO:0001653	peptide receptor activity	0.19884	AT2G02220,AT1G72300
GO:0047558	3-cyanoalanine hydratase activity	0.2	AT5G22300
GO:0018822	nitrile hydratase activity	0.2	AT5G22300
GO:0003855	3-dehydroquinate dehydratase activity	0.2	AT3G06350
GO:0009679	hexose:hydrogen symporter activity	0.2	AT5G26340
GO:0031201	SNARE complex	0.2	AT3G11820
GO:0008446	GDP-mannose 4,6-dehydratase activity	0.2	AT3G51160
GO:0010045	response to nickel ion	0.2	AT1G16150
GO:0004702	receptor signaling protein serine/threonine kinase activity	0.200285	AT1G29750,AT1G69270
GO:0001676	long-chain fatty acid metabolic process	0.202797	AT5G27600,AT4G16760
GO:0017119	Golgi transport complex	0.202797	AT1G30900,AT4G20110
GO:0046983	protein dimerization activity	0.203904	AT1G21130,AT1G21120,AT1G21100
GO:0031348	negative regulation of defense response	0.20493	AT1G74710,AT3G61190,AT4G39030,AT1G59870,AT1G64280,AT3G52430,AT3G11820,AT1G11310
GO:0009742	brassinosteroid mediated signaling	0.206349	AT2G44080,AT4G33430
GO:0009626	plant-type hypersensitive response	0.207697	AT4G26090,AT2G26560,AT5G61900,AT3G07040,AT4G37990,AT1G28380,AT5G45050,AT4G23210,AT4G12720,AT3G54420,AT3G48090,AT3G25070,AT5G45250
GO:0006986	response to unfolded protein	0.213333	AT3G10800
GO:0000151	ubiquitin ligase complex	0.213386	AT3G54850,AT4G36550,AT1G67530,AT1G29340,AT2G45920,AT3G11840,AT5G64660,AT3G07370,AT5G61560,AT5G37490,AT1G76390,AT5G67340,AT1G66160,AT5G09800
GO:0000326	protein storage vacuole	0.213675	AT1G09070
GO:0006623	protein targeting to vacuole	0.214216	AT1G30900,AT5G16830,AT4G20110,AT1G09070
GO:0005460	UDP-glucose transmembrane transporter activity	0.220339	AT2G02810
GO:0005459	UDP-galactose transmembrane transporter activity	0.220339	AT2G02810
GO:0005458	GDP-mannose transmembrane transporter activity	0.220339	AT2G13650
GO:0030132	clathrin coat of coated pit	0.221538	AT3G51890
GO:0006983	ER overload response	0.222222	AT5G47120
GO:0005513	detection of calcium ion	0.222222	AT3G51920,AT5G24270
GO:0016787	hydrolase activity	0.222631	AT1G68760,AT3G63010,AT5G14310,AT1G78210,AT1G68620,AT2G01670,AT4G12720,AT1G73540,AT5G59490,AT5G04980,AT1G79690,AT2G04430,AT5G11650,AT5G16080,AT5G53050,AT3G23570,AT4G24160,AT5G06570,AT2G39400
GO:0001666	response to hypoxia	0.226551	AT3G52430,AT3G48090,AT5G27760
GO:0017145	stem cell division	0.227941	AT5G03730
GO:0009817	defense response to fungus, incompatible interaction	0.228721	AT2G44490,AT5G45110,AT1G29340,AT2G39200,AT1G59870,AT3G21630,AT5G51700,AT1G61560,AT1G11310
GO:0030140	trans-Golgi network transport vesicle	0.230769	AT5G16830,AT4G02195
GO:0009435	NAD biosynthetic process	0.231304	AT5G14760,AT5G50210
GO:0048589	developmental growth	0.237768	AT2G28350
GO:0009969	xyloglucan biosynthetic process	0.238095	AT2G20370
GO:0051410	detoxification of nitrogen compound	0.241553	AT5G22300
GO:0015020	glucuronosyltransferase activity	0.24339	AT1G22340,AT1G22400
GO:0008393	fatty acid (omega-1)-hydroxylase activity	0.24477	AT4G00360
GO:0004362	glutathione-disulfide reductase activity	0.24537	AT3G24170
GO:0042409	caffeoyl-CoA O-methyltransferase activity	0.245614	AT1G67980
GO:0005496	steroid binding	0.245974	AT5G52240
GO:0031202	RNA splicing factor activity, transesterification mechanism	0.246358	AT4G03430
GO:0031219	levanase activity	0.247627	AT5G11920
GO:0031176	endo-1,4-beta-xylanase activity	0.248768	AT1G10050
GO:0010475	galactose-1-phosphate guanylyltransferase (GDP) activity	0.249172	AT5G55120
GO:0004105	choline-phosphate cytidylyltransferase activity	0.249172	AT4G15130
GO:0000266	mitochondrial fission	0.25	AT4G05410
GO:0032442	phenylcoumaran benzylic ether reductase activity	0.25	AT4G39230
GO:0019643	reductive tricarboxylic acid cycle	0.25	AT4G26970
GO:0003905	alkylbase DNA N-glycosylase activity	0.25	AT3G12040
GO:0048442	sepal development	0.25	AT2G28350
GO:0018456	aryl-alcohol dehydrogenase activity	0.25	AT4G37990
GO:0004764	shikimate 5-dehydrogenase activity	0.25	AT3G06350
GO:0046029	mannitol dehydrogenase activity	0.25	AT4G37990
GO:0009743	response to carbohydrate stimulus	0.25	AT2G28350
GO:0006979	response to oxidative stress	0.251239	AT5G16970,AT1G27730,AT1G52200,AT5G59820,AT5G05340,AT2G16500,AT2G29500,AT1G56340,AT4G23190,AT1G09210,AT4G34710,AT2G37040,AT5G44380,AT5G26030,AT4G08770,AT1G09940,AT4G20830,AT1G14540,AT4G17070,AT1G45145,AT3G20340,AT1G72060,AT4G02380,AT4G12720,AT2G40000,AT3G53260,AT5G19890,AT1G33660,AT5G55070,AT1G19020,AT4G08780,AT5G20230,AT4G39640,AT1G13340,AT3G45640,AT5G64100
GO:0004516	nicotinate phosphoribosyltransferase activity	0.25255	AT2G23420
GO:0004048	anthranilate phosphoribosyltransferase activity	0.25255	AT5G17990
GO:0009705	plant-type vacuole membrane	0.254386	AT5G35410,AT3G18440
GO:0005955	calcineurin complex	0.258065	AT5G24270
GO:0016049	cell growth	0.25911	AT2G44080,AT4G33430,AT4G36480
GO:0009831	plant-type cell wall modification during multidimensional cell growth	0.26087	AT1G26770
GO:0005576	extracellular region	0.264133	AT1G75450,AT4G14630,AT1G68765,AT2G43510,AT3G07390,AT4G17030,AT1G76130,AT2G43520
GO:0003785	actin monomer binding	0.267682	AT1G21980
GO:0010053	root epidermal cell differentiation	0.269231	AT5G51060
GO:0047763	caffeate O-methyltransferase activity	0.270833	AT5G54160
GO:0009165	nucleotide biosynthetic process	0.272188	AT2G35390,AT1G10700
GO:0030244	cellulose biosynthetic process	0.274194	AT1G71100,AT5G16510
GO:0045551	cinnamyl-alcohol dehydrogenase activity	0.278788	AT4G34230,AT3G19450
GO:0009816	defense response to bacterium, incompatible interaction	0.280127	AT2G42010,AT5G13320,AT4G23190,AT5G45110,AT1G55020,AT4G11850,AT2G40000,AT3G52430,AT4G23810,AT3G25070,AT4G14400
GO:0009958	positive gravitropism	0.283525	AT5G45710,AT1G68370
GO:0015085	calcium ion transmembrane transporter activity	0.284211	AT4G37640
GO:0006741	NADP biosynthetic process	0.285714	AT3G21070
GO:0004617	phosphoglycerate dehydrogenase activity	0.285714	AT4G34200,AT1G17745
GO:0009620	response to fungus	0.2879	AT1G79670,AT1G51680,AT2G39660,AT3G11820,AT4G01370,AT1G11310,AT3G21240
GO:0009684	indoleacetic acid biosynthetic process	0.293706	AT4G31500,AT2G22330,AT4G39950,AT2G20610
GO:0006098	pentose-phosphate shunt	0.295652	AT3G02360,AT5G41670,AT5G13420
GO:0006783	heme biosynthetic process	0.296182	AT5G26030,AT1G09940
GO:0008287	protein serine/threonine phosphatase complex	0.297011	AT5G47100,AT5G10740,AT2G33700,AT1G07160,AT2G40180,AT1G48040
GO:0046677	response to antibiotic	0.3	AT5G24810,AT5G13750
GO:0003951	NAD+ kinase activity	0.303284	AT3G21070
GO:0004371	glycerone kinase activity	0.303284	AT3G17770
GO:0030118	clathrin coat	0.304348	AT5G35200
GO:0042742	defense response to bacterium	0.305186	AT1G80840,AT2G19190,AT1G22070,AT5G13320,AT5G46330,AT5G10030,AT1G74710,AT2G30770,AT4G33430,AT4G31550,AT4G23210,AT4G31800,AT1G16540,AT5G06320,AT4G12720,AT2G25000,AT1G80460,AT5G52640,AT5G51700,AT1G19180,AT4G26070,AT2G38470,AT5G45250,AT1G02450,AT2G24570
GO:0030151	molybdenum ion binding	0.306122	AT5G20990
GO:0046870	cadmium ion binding	0.306122	AT5G44070
GO:0007186	G-protein coupled receptor protein signaling pathway	0.306297	AT2G41420,AT1G31930,AT4G34390
GO:0010286	heat acclimation	0.309211	AT5G05410,AT5G56030,AT4G17250,AT1G13080
GO:0010117	photoprotection	0.310266	AT1G27730
GO:0030007	cellular potassium ion homeostasis	0.3125	AT5G24270
GO:0019199	transmembrane receptor protein kinase activity	0.313416	AT3G21630
GO:0006096	glycolysis	0.314065	AT3G55410,AT5G63680,AT2G22480,AT1G74030,AT4G26270,AT5G56350,AT1G76550
GO:0019563	glycerol catabolic process	0.318182	AT1G80460
GO:0016621	cinnamoyl-CoA reductase activity	0.318182	AT1G76470,AT1G15950,AT2G33600,AT1G80820,AT5G14700
GO:0009863	salicylic acid mediated signaling pathway	0.32118	AT5G13320,AT3G52400,AT3G11820,AT2G20370
GO:0016051	carbohydrate biosynthetic process	0.324521	AT3G28340,AT2G47180,AT5G39990,AT3G50760,AT4G27480,AT2G35710
GO:0004743	pyruvate kinase activity	0.326431	AT5G63680,AT5G56350
GO:0006812	cation transport	0.329247	AT1G55910,AT3G22910,AT4G30190,AT4G23700,AT1G27770,AT3G57330,AT3G63380,AT1G05300,AT1G64170
GO:0010120	camalexin biosynthetic process	0.333333	AT2G22330,AT2G30770,AT3G26830,AT2G38470,AT4G39950,AT3G45640
GO:0048194	Golgi vesicle budding	0.333333	AT1G59820
GO:0050269	coniferyl-aldehyde dehydrogenase activity	0.333333	AT3G24503
GO:0042350	GDP-L-fucose biosynthetic process	0.333333	AT1G17890
GO:0007584	response to nutrient	0.333333	AT1G30270
GO:0012502	induction of programmed cell death	0.333333	AT2G46240
GO:0019517	threonine catabolic process to D-lactate	0.333333	AT4G26970
GO:0000299	integral to membrane of membrane fraction	0.333333	AT5G61210
GO:0009416	response to light stimulus	0.337102	AT5G59820,AT2G29120,AT2G30490,AT5G48400,AT3G49620,AT1G17060,AT1G01120,AT1G67070,AT2G29100,AT5G11210,AT5G48410,AT5G43760,AT2G29110,AT3G04110
GO:0009630	gravitropism	0.337662	AT3G54220,AT1G31930
GO:0004712	protein serine/threonine/tyrosine kinase activity	0.337884	AT1G64300,AT4G18950,AT5G01850,AT5G40540,AT3G46930,AT5G03730,AT2G43850
GO:0016046	detection of fungus	0.338235	AT5G13320
GO:0019748	secondary metabolic process	0.340184	AT3G13610
GO:0000815	ESCRT III complex	0.340659	AT5G63880,AT2G06530
GO:0005945	6-phosphofructokinase complex	0.340659	AT2G22480,AT4G26270
GO:0015031	protein transport	0.344679	AT2G45070,AT1G29330,AT1G09630,AT4G18430,AT5G45130,AT5G64990,AT1G20350,AT5G63880,AT2G06530,AT3G60540,AT5G47960,AT5G45750,AT3G10640,AT5G59150,AT5G47200,AT4G39890,AT5G65270,AT3G15060
GO:0005543	phospholipid binding	0.345204	AT3G61190
GO:0051861	glycolipid binding	0.345204	AT4G39670
GO:0005787	signal peptidase complex	0.345455	AT5G27430
GO:0005950	anthranilate synthase complex	0.345455	AT5G05730
GO:0010317	pyrophosphate-dependent phosphofructokinase complex, alpha-subunit complex	0.345455	AT1G76550
GO:0005953	CAAX-protein geranylgeranyltransferase complex	0.345455	AT2G39550
GO:0000015	phosphopyruvate hydratase complex	0.345455	AT1G74030
GO:0009507	chloroplast	0.352285	AT3G14050,AT4G39980,AT1G48850,AT1G52200,AT3G48020,AT3G06590,AT2G30550,AT5G05730,AT2G47730,AT5G47870,AT1G14370,AT1G49000,AT2G47680,AT3G25730,AT1G68840,AT3G19120,AT4G36150,AT3G02150,AT5G17990,AT2G17220,AT4G35630,AT1G35210,AT1G10410,AT1G73740,AT1G66090,AT1G17745,AT4G28290,AT2G28760,AT3G08630,AT5G64090,AT5G11250,AT2G38360,AT4G39570,AT5G26030,AT1G08050,AT1G22410,AT4G14680,AT1G55920,AT2G22330,AT3G56410…
GO:0035252	UDP-xylosyltransferase activity	0.353199	AT5G33290
GO:0010193	response to ozone	0.358974	AT2G06050,AT5G55120,AT5G27600,AT4G12720,AT5G49570
GO:0015116	sulfate transmembrane transporter activity	0.359477	AT1G78000,AT5G13550
GO:0009652	thigmotropism	0.360294	AT1G31930,AT2G41100
GO:0043157	response to cation stress	0.360714	AT5G63980
GO:0005057	receptor signaling protein activity	0.363265	AT3G21630
GO:0009733	response to auxin stimulus	0.363442	AT4G36110,AT1G56010,AT3G16500,AT5G13320,AT4G11280,AT3G07390,AT1G18570,AT1G04100,AT3G60690,AT5G45710,AT1G66340,AT5G50760,AT4G09460,AT5G54500,AT5G54490,AT5G62470,AT3G23250,AT2G39550
GO:0051245	negative regulation of cellular defense response	0.371429	AT3G52400,AT3G11820
GO:0004385	guanylate kinase activity	0.371429	AT2G41880,AT3G57550
GO:0017089	glycolipid transporter activity	0.375	AT4G39670
GO:0019692	deoxyribose phosphate metabolic process	0.377778	AT2G45290
GO:0009505	plant-type cell wall	0.380488	AT1G74000,AT5G17770,AT1G32960,AT2G30490,AT1G44130,AT1G33590,AT2G47470,AT2G26440,AT1G04980,AT4G20830,AT2G45220,AT1G16150,AT1G26770,AT3G02880,AT5G06860,AT5G61790,AT1G23200,AT2G47550,AT3G10720,AT1G74010,AT5G18470,AT5G16510
GO:0005313	L-glutamate transmembrane transporter activity	0.381223	AT4G21120
GO:0007165	signal transduction	0.382684	AT1G09530,AT2G15080,AT3G05370,AT1G51690,AT3G26020,AT3G11080,AT3G05660,AT2G25440,AT4G18700,AT1G17240,AT1G33590,AT2G32680,AT4G12020,AT2G01450,AT5G07070,AT2G34930,AT5G06860,AT3G20410,AT1G64610,AT5G02430,AT3G21650,AT1G33600,AT3G05990,AT4G11330,AT1G51270,AT5G58380,AT5G25910,AT2G38490,AT2G25470,AT3G28890,AT4G01370,AT5G40170,AT5G42010,AT3G45640,AT4G04220,AT1G03060,AT3G05360,AT1G71400,AT1G01560,AT2G32660
GO:0019379	sulfate assimilation, phosphoadenylyl sulfate reduction by phosphoadenylyl-sulfate reductase (thioredoxin)	0.384615	AT1G62180
GO:0005315	inorganic phosphate transmembrane transporter activity	0.384615	AT5G44370
GO:0008356	asymmetric cell division	0.385965	AT3G54220
GO:0004473	malate dehydrogenase (oxaloacetate-decarboxylating) (NADP+) activity	0.385965	AT5G11670
GO:0009625	response to insect	0.386507	AT1G66340,AT1G64280,AT3G52430
GO:0005262	calcium channel activity	0.390688	AT1G27770
GO:0002229	defense response to oomycetes	0.396825	AT4G33430
GO:0010071	root meristem specification	0.4	AT3G07780
GO:0009759	indole glucosinolate biosynthetic process	0.406593	AT4G31500,AT1G18570
GO:0019835	cytolysis	0.409091	AT5G57060
GO:0007205	activation of protein kinase C activity	0.409559	AT2G20900,AT4G30340,AT5G63770
GO:0003824	catalytic activity	0.412785	AT3G14050,AT3G14990,AT1G68470,AT1G64660,AT3G05170,AT4G34200,AT2G28760,AT2G39420,AT1G64400,AT1G08940,AT1G65520,AT1G52760,AT1G30620,AT5G52810,AT1G17890,AT3G57630,AT1G78050,AT1G74790,AT4G12250,AT2G31955,AT5G62630,AT5G43760,AT5G44480,AT4G25720,AT4G20460,AT1G05350,AT3G50920,AT5G03080,AT4G30530,AT2G20370,AT1G64710,AT1G24350,AT3G57460,AT5G24760,AT4G23850,AT1G17330,AT5G36880,AT2G31990,AT3G06350,AT5G33290…
GO:0035198	miRNA binding	0.413293	AT2G28350
GO:0022625	cytosolic large ribosomal subunit	0.413942	AT2G39390,AT1G80750
GO:0050829	defense response to Gram-negative bacterium	0.416201	AT5G57060
GO:0009868	jasmonic acid and ethylene-dependent systemic resistance, jasmonic acid mediated signaling pathway	0.416513	AT4G01370
GO:0046839	phospholipid dephosphorylation	0.416667	AT5G04540
GO:0004103	choline kinase activity	0.418414	AT1G71697
GO:0004594	pantothenate kinase activity	0.418414	AT1G60440
GO:0035265	organ growth	0.419086	AT2G44080
GO:0004091	carboxylesterase activity	0.427597	AT1G53920,AT3G48690,AT5G45280,AT5G03610,AT5G14930,AT1G29670,AT5G62180,AT3G09410
GO:0004671	protein-S-isoprenylcysteine O-methyltransferase activity	0.427707	AT5G08335
GO:0008506	sucrose:hydrogen symporter activity	0.428515	AT2G02860,AT3G19930
GO:0004634	phosphopyruvate hydratase activity	0.428571	AT1G74030
GO:0010044	response to aluminum ion	0.428571	AT1G34370
GO:0003994	aconitate hydratase activity	0.428571	AT4G26970
GO:0016709	oxidoreductase activity, acting on paired donors, with incorporation or reduction of molecular oxygen, NADH or NADPH as one donor, and incorporation of one atom of oxygen	0.429445	AT4G31500
GO:0010295	(+)-abscisic acid 8'-hydroxylase activity	0.429777	AT5G45340
GO:0046982	protein heterodimerization activity	0.429873	AT5G39610,AT4G33430,AT3G16050,AT2G39550
GO:0048037	cofactor binding	0.430923	AT4G34200
GO:0048268	clathrin coat assembly	0.431034	AT5G35200
GO:0009740	gibberellic acid mediated signaling	0.434446	AT1G09530
GO:0017077	oxidative phosphorylation uncoupler activity	0.436527	AT3G54110
GO:0015238	drug transporter activity	0.436778	AT5G52050
GO:0004022	alcohol dehydrogenase activity	0.437063	AT2G29350,AT5G19440
GO:0004345	glucose-6-phosphate dehydrogenase activity	0.437063	AT5G40760,AT1G24280
GO:0007264	small GTPase mediated signal transduction	0.437435	AT1G09630,AT4G18430,AT3G21700,AT5G45130,AT5G64990,AT5G47960,AT5G45750,AT1G09180,AT5G59150,AT5G54840,AT5G47200,AT4G39890,AT5G65270,AT3G15060
GO:0006904	vesicle docking during exocytosis	0.4375	AT1G07000,AT5G50380,AT3G09520,AT5G59730,AT2G39380,AT5G58430,AT5G61010,AT3G55150,AT3G29400
GO:0042545	cell wall modification	0.441558	AT2G26440,AT2G45220,AT1G23200,AT2G47550,AT3G10720
GO:0007015	actin filament organization	0.441711	AT1G13180
GO:0005786	signal recognition particle, endoplasmic reticulum targeting	0.444444	AT4G30600
GO:0048441	petal development	0.454545	AT2G28350
GO:0009639	response to red or far red light	0.455021	AT1G09530,AT1G02400,AT2G32250,AT5G45340,AT1G30040
GO:0004861	cyclin-dependent protein kinase inhibitor activity	0.461538	AT3G24810
GO:0045727	positive regulation of translation	0.464286	AT3G08720
GO:0042546	cell wall biogenesis	0.466667	AT1G14070,AT2G15390
GO:0009688	abscisic acid biosynthetic process	0.466667	AT2G27150,AT1G16540
GO:0006909	phagocytosis	0.467526	AT3G03610
GO:0003713	transcription coactivator activity	0.468297	AT3G24500,AT5G24590
GO:0046836	glycolipid transport	0.472824	AT4G39670
GO:0005488	binding	0.47435	AT5G35200,AT3G59290,AT3G54850,AT4G36550,AT4G39820,AT1G07030,AT5G48970,AT4G34200,AT3G03790,AT3G54110,AT5G47730,AT5G01340,AT1G67530,AT1G51350,AT2G47490,AT3G09490,AT5G27520,AT3G03440,AT1G14560,AT1G62740,AT1G27760,AT3G11840,AT1G63500,AT5G64660,AT5G03160,AT4G32400,AT5G15640,AT4G12400,AT3G13330,AT2G22500,AT1G18260,AT3G09350,AT5G13490,AT3G04710,AT5G37490,AT1G64710,AT3G16760,AT5G24760,AT3G48850,AT1G76390…
GO:0001560	regulation of cell growth by extracellular stimulus	0.475966	AT2G20610
GO:0010181	FMN binding	0.480869	AT4G27270,AT5G54500
GO:0004540	ribonuclease activity	0.48546	AT5G22250,AT3G44260
GO:0015193	L-proline transmembrane transporter activity	0.488235	AT3G55740
GO:0015172	acidic amino acid transmembrane transporter activity	0.488235	AT5G63850
GO:0000302	response to reactive oxygen species	0.496339	AT4G02380,AT1G07890
GO:0004872	receptor activity	0.499178	AT1G29330,AT5G55610,AT3G04580,AT5G45250
GO:0009851	auxin biosynthetic process	0.5	AT5G05730,AT5G20960
GO:0019789	SUMO ligase activity	0.5	AT5G60410
GO:0042351	'de novo' GDP-L-fucose biosynthetic process	0.5	AT3G51160
GO:0009916	alternative oxidase activity	0.5	AT3G22370,AT1G32350
GO:0045793	positive regulation of cell size	0.5	AT5G61900
GO:0008883	glutamyl-tRNA reductase activity	0.5	AT1G09940
GO:0030148	sphingolipid biosynthetic process	0.5	AT4G36480
GO:0019363	pyridine nucleotide biosynthetic process	0.5	AT3G21070
GO:0000300	peripheral to membrane of membrane fraction	0.5	AT1G12360
GO:0009741	response to brassinosteroid stimulus	0.5	AT2G44080
GO:0015520	tetracycline:hydrogen antiporter activity	0.5	AT5G13750
GO:0019567	arabinose biosynthetic process	0.5	AT1G30620
GO:0005681	spliceosome	0.5	AT1G09140
GO:0010363	regulation of plant-type hypersensitive response	0.5	AT3G52400,AT3G11820
GO:0045548	phenylalanine ammonia-lyase activity	0.5	AT2G37040,AT3G53260
GO:0009693	ethylene biosynthetic process	0.5	AT1G05010,AT1G02500,AT4G11280,AT1G01480,AT4G37770,AT4G26200
GO:0047427	cyanoalanine nitrilase activity	0.5	AT5G22300
GO:0009739	response to gibberellin stimulus	0.500992	AT2G16720,AT1G18570,AT1G66340,AT4G09460,AT5G62470
GO:0030234	enzyme regulator activity	0.505407	AT4G16500
GO:0015450	P-P-bond-hydrolysis-driven protein transmembrane transporter activity	0.505933	AT3G48570,AT1G20350,AT4G24920,AT1G29310,AT5G50460,AT2G34250
GO:0009870	defense response signaling pathway, resistance gene-dependent	0.506803	AT5G60410,AT3G18690,AT4G12720
GO:0008898	homocysteine S-methyltransferase activity	0.509946	AT3G25900
GO:0009970	cellular response to sulfate starvation	0.510282	AT1G55920,AT1G78000
GO:0009727	detection of ethylene stimulus	0.512155	AT1G66340
GO:0019200	carbohydrate kinase activity	0.514678	AT1G80460
GO:0016531	copper chaperone activity	0.516398	AT3G15352
GO:0009411	response to UV	0.517174	AT5G18070,AT1G51680,AT3G21240
GO:0005783	endoplasmic reticulum	0.519292	AT1G29330,AT5G24810,AT2G40890,AT2G40950,AT4G24190,AT4G31500,AT1G56340,AT5G17770,AT1G65820,AT4G30600,AT4G34460,AT1G09210,AT2G30490,AT1G70770,AT4G29520,AT1G08450,AT3G05230,AT2G47470,AT2G24180,AT1G72280,AT2G32920,AT2G28630,AT3G51440,AT3G02875,AT4G32650,AT1G77510,AT4G21180,AT1G01120,AT1G19360,AT4G30210,AT4G36220,AT1G66340,AT2G45140,AT4G37640,AT1G27770,AT3G54960,AT4G37370,AT2G25110,AT5G03160,AT3G26830…
GO:0004696	glycogen synthase kinase 3 activity	0.522748	AT3G04580
GO:0004709	MAP kinase kinase kinase activity	0.522782	AT4G08500
GO:0010445	nuclear dicing body	0.52381	AT1G01040
GO:0009813	flavonoid biosynthetic process	0.524155	AT2G40890,AT3G19010
GO:0000910	cytokinesis	0.525028	AT1G12360,AT1G01040
GO:0046686	response to cadmium ion	0.528281	AT2G16720,AT5G44070,AT1G16150,AT4G09460,AT5G62470,AT3G23250,AT4G08500
GO:0008158	hedgehog receptor activity	0.535873	AT1G42470
GO:0004930	G-protein coupled receptor activity	0.535873	AT3G26090
GO:0015385	sodium:hydrogen antiporter activity	0.537594	AT4G23700,AT1G64170
GO:0009062	fatty acid catabolic process	0.538462	AT1G65520
GO:0005885	Arp2/3 protein complex	0.538462	AT1G13180
GO:0005956	protein kinase CK2 complex	0.538462	AT2G44680
GO:0009267	cellular response to starvation	0.53867	AT3G49620
GO:0008289	lipid binding	0.546907	AT4G12500,AT4G12490,AT4G22470,AT4G12470,AT3G22600
GO:0004867	serine-type endopeptidase inhibitor activity	0.547619	AT2G38870,AT3G61980,AT1G72060,AT5G43580
GO:0009825	multidimensional cell growth	0.547716	AT1G69490,AT1G13180
GO:0004616	phosphogluconate dehydrogenase (decarboxylating) activity	0.553846	AT3G02360,AT5G41670
GO:0019642	anaerobic glycolysis	0.553896	AT1G74030
GO:0003779	actin binding	0.554658	AT4G30160,AT1G70140,AT1G59910,AT5G54650,AT1G24150
GO:0010043	response to zinc ion	0.555556	AT1G16150
GO:0015976	carbon utilization	0.564513	AT1G23730
GO:0004428	inositol or phosphatidylinositol kinase activity	0.564538	AT1G64460,AT2G46500
GO:0006897	endocytosis	0.565866	AT3G58600
GO:0006811	ion transport	0.567488	AT1G01340,AT4G01010
GO:0004356	glutamate-ammonia ligase activity	0.571429	AT5G16570,AT3G53180,AT5G37600
GO:0005544	calcium-dependent phospholipid binding	0.571565	AT5G61900
GO:0016779	nucleotidyltransferase activity	0.574826	AT2G04650,AT2G25850
GO:0042538	hyperosmotic salinity response	0.575289	AT5G59820,AT2G40950,AT5G43170,AT5G67450,AT5G49480,AT3G19580
GO:0000813	ESCRT I complex	0.575758	AT4G21560
GO:0030001	metal ion transport	0.57768	AT5G52750,AT5G03380,AT2G35730,AT2G36950,AT5G60800,AT5G52760,AT4G35060
GO:0008375	acetylglucosaminyltransferase activity	0.585357	AT5G39990,AT4G27480
GO:0015692	lead ion transport	0.585814	AT1G15520
GO:0006886	intracellular protein transport	0.593098	AT3G07680,AT1G76970,AT5G16830,AT3G48570,AT4G24920,AT1G09180,AT3G52400,AT4G20110,AT1G26690,AT5G42570,AT4G02195,AT3G11820,AT1G21380,AT1G21900,AT5G50460,AT3G16270,AT3G05710,AT3G07190,AT3G51890
GO:0050826	response to freezing	0.594995	AT5G60410
GO:0004335	galactokinase activity	0.59507	AT3G01640
GO:0009704	de-etiolation	0.598232	AT1G09530
GO:0004713	protein tyrosine kinase activity	0.59971	AT1G63500
GO:0046688	response to copper ion	0.6	AT3G15352
GO:0010555	response to mannitol stimulus	0.6	AT1G31930
GO:0048046	apoplast	0.602882	AT1G32960,AT1G32940,AT1G09560,AT4G30280,AT1G02900,AT4G25810,AT4G39640
GO:0010267	RNA interference, production of ta-siRNAs	0.604396	AT3G15390,AT1G01040
GO:0009346	citrate lyase complex	0.604396	AT1G09430
GO:0019564	aerobic glycerol catabolic process	0.607143	AT1G74030
GO:0005102	receptor binding	0.607295	AT1G68765
GO:0009641	shade avoidance	0.611857	AT4G31500
GO:0003979	UDP-glucose 6-dehydrogenase activity	0.618182	AT5G15490
GO:0005834	heterotrimeric G-protein complex	0.619192	AT4G02730,AT4G34460,AT5G56190,AT1G64610,AT5G02430,AT5G42010
GO:0007166	cell surface receptor linked signal transduction	0.619202	AT1G78280
GO:0009814	defense response, incompatible interaction	0.620239	AT1G29340,AT1G51660,AT5G64890,AT3G21220
GO:0004673	protein histidine kinase activity	0.62107	AT3G04580,AT1G66340
GO:0000166	nucleotide binding	0.621264	AT1G31540,AT5G45060,AT3G44400,AT1G51690,AT1G63750,AT1G03905,AT4G11170,AT3G07040,AT4G02730,AT4G34460,AT1G66090,AT4G36140,AT5G05570,AT3G04220,AT3G44630,AT1G63740,AT4G05410,AT3G52190,AT5G46520,AT5G58120,AT5G04720
GO:0009867	jasmonic acid mediated signaling pathway	0.629941	AT4G34460,AT3G52400,AT3G11820,AT1G19180,AT3G23240
GO:0016688	L-ascorbate peroxidase activity	0.632866	AT1G07890
GO:0004605	phosphatidate cytidylyltransferase activity	0.632963	AT3G45040
GO:0052542	callose deposition during defense response	0.637134	AT1G28380
GO:0009753	response to jasmonic acid stimulus	0.638298	AT5G13220,AT1G72450,AT2G16720,AT5G55120,AT4G11280,AT1G15520,AT4G34710,AT1G18570,AT3G09940,AT1G55020,AT1G74020,AT4G09460,AT5G62470,AT3G23250,AT5G27380,AT5G64900,AT1G17380,AT1G19180,AT2G24850
GO:0009414	response to water deprivation	0.642384	AT3G51920,AT5G47100,AT1G27730,AT5G05410,AT1G30270,AT3G26090,AT2G30870,AT5G60410,AT4G17615,AT4G02200,AT5G45340,AT5G63850,AT2G35930,AT4G26070,AT3G24500,AT1G52890,AT3G19580,AT2G39550,AT2G41430,AT2G41010,AT2G17840
GO:0035061	interchromatin granule	0.642857	AT1G09140
GO:0048366	leaf development	0.647998	AT1G07630,AT2G28350,AT5G56030,AT5G53290,AT4G30340,AT5G63770,AT2G28890
GO:0005768	endosome	0.654545	AT4G33430,AT2G32670
GO:0003725	double-stranded RNA binding	0.65568	AT1G01040
GO:0005261	cation channel activity	0.661061	AT3G04110
GO:0009932	cell tip growth	0.661963	AT1G70140
GO:0009651	response to salt stress	0.66514	AT3G51920,AT1G27730,AT4G29810,AT2G16720,AT1G56010,AT2G16500,AT5G27600,AT1G28380,AT4G34710,AT1G18570,AT3G02140,AT3G08720,AT1G66340,AT1G16540,AT4G09460,AT4G12720,AT4G17615,AT5G62470,AT3G57530,AT3G23250,AT3G07370,AT5G35410,AT2G26650,AT3G55270,AT4G01370,AT4G08500,AT3G21780,AT2G41010,AT2G17840
GO:0042372	phylloquinone biosynthetic process	0.666667	AT1G74710
GO:0006562	proline catabolic process	0.666667	AT5G38710
GO:0006873	cellular ion homeostasis	0.666667	AT5G24030
GO:0019544	arginine catabolic process to glutamate	0.666667	AT5G52810
GO:0019358	nicotinate nucleotide salvage	0.666667	AT2G23420
GO:0009268	response to pH	0.666667	AT2G30360
GO:0042981	regulation of apoptosis	0.666667	AT2G46240,AT5G47120
GO:0006481	C-terminal protein amino acid methylation	0.666667	AT5G08335
GO:0015780	nucleotide-sugar transport	0.66735	AT2G02810
GO:0009751	response to salicylic acid stimulus	0.673516	AT2G16720,AT1G80840,AT1G15520,AT3G61190,AT1G18570,AT4G31800,AT4G09460,AT2G25000,AT2G40000,AT5G62470,AT2G37710,AT4G14400,AT5G49570
GO:0009627	systemic acquired resistance	0.67604	AT1G74710,AT3G04720,AT1G59870,AT1G64280,AT3G52430,AT3G48090
GO:0015175	neutral amino acid transmembrane transporter activity	0.684993	AT5G63850
GO:0015171	amino acid transmembrane transporter activity	0.690476	AT1G77380,AT4G35180,AT5G40780,AT1G80510,AT5G63850,AT3G55740
GO:0000159	protein phosphatase type 2A complex	0.69251	AT1G51690,AT3G26020,AT3G21650
GO:0003678	DNA helicase activity	0.697816	AT5G67630
GO:0003729	mRNA binding	0.69794	AT1G09140
GO:0015079	potassium ion transmembrane transporter activity	0.698701	AT4G19960,AT5G51710
GO:0042631	cellular response to water deprivation	0.69973	AT4G02380
GO:0010072	primary shoot apical meristem specification	0.7	AT1G56010
GO:0006917	induction of apoptosis	0.7	AT1G02170
GO:0030003	cellular cation homeostasis	0.7	AT3G04110
GO:0005509	calcium ion binding	0.704062	AT3G51920,AT5G47100,AT1G30900,AT3G03000,AT1G56340,AT1G09210,AT3G25600,AT3G47480,AT1G08450,AT3G10300,AT5G44090,AT4G20110,AT4G17615,AT5G54490,AT5G24430,AT5G61790,AT5G04170,AT1G18210,AT5G44460,AT5G24270,AT5G49480,AT2G41100,AT5G39670,AT3G49370,AT4G27280,AT2G41110,AT1G76650,AT4G32060,AT5G07340,AT1G21550,AT4G20780,AT3G01830
GO:0008553	hydrogen-exporting ATPase activity, phosphorylative mechanism	0.70485	AT4G30190
GO:0005992	trehalose biosynthetic process	0.705128	AT5G65140,AT2G18700
GO:0016798	hydrolase activity, acting on glycosyl bonds	0.713665	AT5G15870,AT4G30280,AT4G25810
GO:0010447	response to acidity	0.714286	AT1G34370
GO:0016481	negative regulation of transcription	0.717371	AT5G63980,AT1G02450
GO:0016209	antioxidant activity	0.71816	AT1G60420
GO:0006995	cellular response to nitrogen starvation	0.726991	AT5G45380
GO:0015198	oligopeptide transporter activity	0.727273	AT1G65730,AT5G53550,AT4G27730
GO:0019303	D-ribose catabolic process	0.730769	AT2G45290
GO:0005198	structural molecule activity	0.733037	AT2G45140,AT1G51270,AT5G54110,AT3G51890
GO:0004089	carbonate dehydratase activity	0.733333	AT1G23730
GO:0005732	small nucleolar ribonucleoprotein complex	0.735294	AT4G05410
GO:0004518	nuclease activity	0.738038	AT2G32930,AT5G61780
GO:0009832	plant-type cell wall biogenesis	0.74026	AT5G16910,AT1G30620
GO:0022627	cytosolic small ribosomal subunit	0.741077	AT3G57490,AT5G39850
GO:0005338	nucleotide-sugar transmembrane transporter activity	0.741877	AT2G13650
GO:0042803	protein homodimerization activity	0.745662	AT3G54220,AT5G39610,AT4G12720
GO:0015386	potassium:hydrogen antiporter activity	0.749123	AT5G51710
GO:0004029	aldehyde dehydrogenase (NAD) activity	0.75	AT3G24503
GO:0005777	peroxisome	0.751089	AT1G20510,AT2G06050,AT5G27600,AT2G44490,AT1G65520,AT5G04870,AT4G16760
GO:0003677	DNA binding	0.751859	AT1G09530,AT1G66230,AT5G05410,AT2G16720,AT2G31230,AT2G18350,AT5G47230,AT5G63330,AT2G27580,AT4G17490,AT2G40950,AT1G22070,AT1G68840,AT4G39780,AT1G50640,AT5G05140,AT4G17500,AT1G28370,AT5G60410,AT5G10030,AT1G43160,AT1G18570,AT1G11100,AT1G42990,AT2G32930,AT2G33710,AT1G61660,AT3G50260,AT5G45710,AT5G23710,AT2G26150,AT1G16640,AT4G18880,AT5G58900,AT1G01260,AT1G67970,AT2G23340,AT5G27610,AT5G62020,AT5G53290…
GO:0000271	polysaccharide biosynthetic process	0.752201	AT5G16910
GO:0046914	transition metal ion binding	0.752296	AT3G48890,AT2G46650
GO:0030036	actin cytoskeleton organization and biogenesis	0.758621	AT1G59910
GO:0051082	unfolded protein binding	0.760636	AT3G62600,AT5G18750,AT3G08970,AT5G49910,AT4G21180,AT1G76700,AT4G28480,AT2G20560,AT5G12030,AT5G52640,AT5G61790,AT5G07340
GO:0022857	transmembrane transporter activity	0.761617	AT3G10960
GO:0005634	nucleus	0.762034	AT5G16970,AT1G09530,AT1G72450,AT5G52510,AT1G27730,AT5G05410,AT3G54220,AT3G06590,AT1G77840,AT2G31230,AT5G47230,AT1G80840,AT5G15130,AT4G17490,AT2G40950,AT1G22070,AT3G09920,AT3G16500,AT1G30270,AT3G25730,AT1G69490,AT1G68840,AT5G49520,AT1G10585,AT4G22070,AT4G39780,AT4G03430,AT1G50640,AT5G05140,AT5G39610,AT3G26090,AT1G28370,AT3G01970,AT4G25350,AT5G25440,AT5G66320,AT5G60410,AT4G12020,AT5G10030,AT1G05710…
GO:0045087	innate immune response	0.762118	AT4G12020,AT1G51270,AT5G64900,AT1G73080
GO:0005986	sucrose biosynthetic process	0.764706	AT5G51830
GO:0000038	very-long-chain fatty acid metabolic process	0.764706	AT1G01120
GO:0015326	cationic amino acid transmembrane transporter activity	0.767521	AT4G21120
GO:0031072	heat shock protein binding	0.767761	AT3G62600,AT5G18750,AT3G08970,AT3G14200,AT1G56300,AT5G03030,AT4G21180,AT1G76700,AT4G28480,AT2G20560,AT5G03160,AT1G71000
GO:0007267	cell-cell signaling	0.769231	AT1G02900
GO:0004033	aldo-keto reductase activity	0.769231	AT1G60730
GO:0005840	ribosome	0.774894	AT3G57490,AT1G29970,AT2G39390,AT5G39785,AT1G66580
GO:0005345	purine transmembrane transporter activity	0.777778	AT1G19770
GO:0000304	response to singlet oxygen	0.782819	AT3G48090
GO:0045449	regulation of transcription	0.783265	AT5G52510,AT3G06590,AT3G16220,AT2G18350,AT1G10585,AT3G02150,AT5G58620,AT3G46600,AT4G12020,AT3G19360,AT1G61660,AT2G29060,AT3G53600,AT1G34370,AT2G43060,AT2G37430,AT5G58900,AT1G01260,AT2G28710,AT1G55110,AT1G59640,AT2G19810,AT5G62470,AT5G46910,AT1G51700,AT2G42280,AT5G59450,AT2G40140,AT3G45260,AT5G04760,AT1G21450,AT1G68670,AT2G38250,AT4G17230,AT2G41900,AT5G01380,AT3G55980,AT1G55970
GO:0042594	response to starvation	0.788052	AT5G54730
GO:0009269	response to desiccation	0.793882	AT2G46140,AT2G21620
GO:0043565	sequence-specific DNA binding	0.794799	AT3G54220,AT2G46270
GO:0005794	Golgi apparatus	0.797453	AT1G29330,AT3G28480,AT3G12740,AT2G13650,AT1G59820,AT5G16910,AT1G30000,AT1G30620,AT2G20370,AT5G44370,AT5G33290,AT5G16510,AT1G11890
GO:0047262	polygalacturonate 4-alpha-galacturonosyltransferase activity	0.799333	AT3G28340,AT3G50760
GO:0006635	fatty acid beta-oxidation	0.800134	AT4G16760,AT1G06550
GO:0005739	mitochondrion	0.805166	AT5G03290,AT2G17130,AT2G41380,AT3G01820,AT4G24190,AT4G31500,AT4G11170,AT4G34200,AT1G56340,AT5G48530,AT1G73260,AT1G09210,AT5G64990,AT3G54110,AT5G18070,AT5G26030,AT4G36500,AT1G02940,AT4G23885,AT4G39030,AT3G55410,AT3G13110,AT5G55610,AT5G47580,AT3G22370,AT5G41670,AT5G25940,AT3G22240,AT4G33920,AT5G44090,AT1G26130,AT4G00570,AT2G31955,AT4G05020,AT5G07440,AT4G32400,AT4G23290,AT5G13420,AT5G15640,AT3G05390…
GO:0009536	plastid	0.806471	AT5G26030,AT2G14750,AT4G39940,AT1G74710,AT4G39030,AT5G55610,AT3G22370,AT4G32400,AT5G13490,AT3G50930,AT3G08640,AT4G04610,AT5G01500
GO:0009864	induced systemic resistance, jasmonic acid mediated signaling pathway	0.80688	AT3G15210
GO:0006446	regulation of translational initiation	0.807692	AT1G77840
GO:0016788	hydrolase activity, acting on ester bonds	0.809597	AT5G48370,AT1G48320
GO:0051607	defense response to virus	0.816222	AT2G35980,AT5G06320,AT5G24590
GO:0030145	manganese ion binding	0.817162	AT4G14630,AT1G09560
GO:0009789	positive regulation of abscisic acid mediated signaling	0.818182	AT1G35670,AT4G09570
GO:0008121	ubiquinol-cytochrome-c reductase activity	0.818182	AT5G25450
GO:0019654	acetate fermentation	0.818182	AT1G74030,AT5G51830
GO:0009409	response to cold	0.824508	AT1G27730,AT4G29810,AT2G47730,AT5G59820,AT5G47230,AT4G24190,AT4G03430,AT1G09560,AT5G10030,AT3G61190,AT1G55920,AT1G15950,AT4G34150,AT1G01120,AT3G08720,AT3G22370,AT1G16540,AT4G02380,AT5G43170,AT5G63980,AT4G17615,AT5G43760,AT1G80820,AT5G63770,AT2G40140,AT5G67450,AT4G01370,AT4G08500,AT3G45640,AT2G17840
GO:0009860	pollen tube growth	0.828174	AT4G02350
GO:0009706	chloroplast inner membrane	0.828877	AT1G27770,AT3G57280
GO:0005770	late endosome	0.829721	AT5G16830
GO:0045941	positive regulation of transcription	0.831688	AT4G23810,AT3G24500
GO:0009826	unidimensional cell growth	0.83206	AT4G17030,AT1G17060,AT1G26770,AT2G20370,AT3G51160
GO:0009446	putrescine biosynthetic process	0.833333	AT4G34710
GO:0009060	aerobic respiration	0.833333	AT5G51060
GO:0015743	malate transport	0.833333	AT3G18440
GO:0005199	structural constituent of cell wall	0.838039	AT1G26770
GO:0005253	anion channel activity	0.838235	AT3G18440
GO:0042626	ATPase activity, coupled to transmembrane movement of substances	0.839286	AT2G39350,AT3G13100,AT1G15520,AT3G47780,AT1G53390,AT1G59870,AT1G28010,AT2G39480,AT3G62150
GO:0009612	response to mechanical stimulus	0.843823	AT4G11280,AT5G61210,AT2G41100
GO:0003676	nucleic acid binding	0.850334	AT1G27730,AT5G59820,AT2G47680,AT5G04340,AT3G19360,AT2G32930,AT3G53600,AT1G34370,AT2G37430,AT3G52120,AT2G28710,AT5G43170,AT1G55110,AT2G19810,AT3G57480,AT5G61780,AT2G06510,AT5G67450,AT3G45260,AT4G05410,AT3G19580,AT2G41900,AT4G17720,AT2G01650
GO:0009624	response to nematode	0.851095	AT5G52450,AT2G39350,AT2G38290,AT1G59740,AT5G53550,AT4G32650,AT4G39030,AT3G17700,AT1G58340,AT5G44370
GO:0009631	cold acclimation	0.851606	AT4G29810,AT5G59820
GO:0009637	response to blue light	0.855934	AT1G66480
GO:0010075	regulation of meristem growth	0.857143	AT4G24190
GO:0048364	root development	0.857143	AT1G59820,AT1G55020,AT5G45710,AT1G31930,AT4G30340,AT5G63770
GO:0010017	red or far red light signaling pathway	0.867747	AT1G09530,AT4G25350
GO:0004028	3-chloroallyl aldehyde dehydrogenase activity	0.875	AT3G24503
GO:0006954	inflammatory response	0.876834	AT3G51660
GO:0010114	response to red light	0.878274	AT4G31500,AT1G30040
GO:0005744	mitochondrial inner membrane presequence translocase complex	0.88	AT1G20350
GO:0005506	iron ion binding	0.88248	AT1G17420,AT1G72520
GO:0009615	response to virus	0.883374	AT3G12580,AT5G45050,AT3G04720
GO:0022626	cytosolic ribosome	0.885631	AT2G39390
GO:0006869	lipid transport	0.890721	AT4G12500,AT4G12490,AT4G22470,AT4G12470,AT3G22600
GO:0008757	S-adenosylmethionine-dependent methyltransferase activity	0.890862	AT1G02500
GO:0006807	nitrogen compound metabolic process	0.890924	AT5G19550
GO:0006094	gluconeogenesis	0.897059	AT1G74030
GO:0016469	proton-transporting two-sector ATPase complex	0.897436	AT5G59540
GO:0030304	trypsin inhibitor activity	0.899767	AT2G43510,AT2G43520
GO:0009934	regulation of meristem organization	0.9	AT4G24190
GO:0010224	response to UV-B	0.90156	AT5G05410,AT4G36220
GO:0003684	damaged DNA binding	0.90313	AT5G58720
GO:0009061	anaerobic respiration	0.904762	AT3G01820,AT1G74030,AT4G26970,AT3G07800
GO:0006808	regulation of nitrogen utilization	0.909091	AT4G39230
GO:0030528	transcription regulator activity	0.910234	AT1G09530,AT5G05140,AT5G64220,AT2G22300,AT3G16940,AT4G25520
GO:0006970	response to osmotic stress	0.917341	AT4G34710,AT1G16540,AT4G17615,AT5G54110,AT4G08500,AT3G45640,AT3G21780
GO:0048367	shoot development	0.92	AT1G59820,AT5G08335
GO:0009266	response to temperature stimulus	0.923077	AT5G61900,AT3G61190,AT3G07370,AT2G41100
GO:0004650	polygalacturonase activity	0.923662	AT1G02460
GO:0005643	nuclear pore	0.927419	AT4G17500
GO:0048196	middle lamella-containing extracellular matrix	0.928571	AT2G02850
GO:0005200	structural constituent of cytoskeleton	0.93031	AT1G13180
GO:0000156	two-component response regulator activity	0.931529	AT1G66340
GO:0008643	carbohydrate transport	0.932664	AT2G20780,AT4G36670,AT3G18830
GO:0006537	glutamate biosynthetic process	0.933333	AT5G38710
GO:0009788	negative regulation of abscisic acid mediated signaling	0.934066	AT3G02140,AT2G39550,AT5G08335
GO:0006813	potassium ion transport	0.934912	AT2G24240,AT4G19960,AT5G51710,AT2G26650
GO:0004386	helicase activity	0.935428	AT2G47680,AT1G11100,AT1G33390,AT1G61140
GO:0016607	nuclear speck	0.947368	AT1G09140
GO:0009616	virus induced gene silencing	0.94752	AT1G01040
GO:0002213	defense response to insect	0.952049	AT3G52430
GO:0016192	vesicle-mediated transport	0.954579	AT5G61210,AT5G05570,AT2G32670,AT3G51890,AT1G11890
GO:0009861	jasmonic acid and ethylene-dependent systemic resistance	0.957514	AT4G01370
GO:0003682	chromatin binding	0.960678	AT5G42140
GO:0010252	auxin homeostasis	0.965035	AT5G48930
GO:0008654	phospholipid biosynthetic process	0.965556	AT5G57190,AT3G45040
GO:0007242	intracellular signaling cascade	0.968039	AT2G42060,AT2G21850,AT4G01920
GO:0016036	cellular response to phosphate starvation	0.973075	AT3G52190
GO:0016491	oxidoreductase activity	0.975686	AT4G27270,AT2G29350,AT2G47130,AT3G49620,AT5G59540,AT4G05390,AT5G07440,AT1G60420,AT1G64710,AT5G24760,AT4G13180,AT4G39830,AT2G47140
GO:0004842	ubiquitin-protein ligase activity	0.976104	AT3G54850,AT4G36550,AT4G14220,AT4G03510,AT1G14260,AT1G08050,AT5G67250,AT1G67530,AT4G30640,AT1G29340,AT2G42360,AT2G45920,AT3G11840,AT5G64660,AT3G17000,AT5G27920,AT5G60710,AT5G01720,AT3G07370,AT2G35930,AT5G37490,AT5G43190,AT1G76390,AT2G35000,AT5G67340,AT1G66160,AT5G09800
GO:0008270	zinc ion binding	0.979576	AT1G27730,AT3G05200,AT1G76410,AT4G14220,AT4G11370,AT5G59820,AT4G40070,AT2G27580,AT3G28210,AT5G48655,AT5G66630,AT4G03510,AT5G47050,AT5G01980,AT5G20910,AT5G01450,AT1G14260,AT1G55460,AT5G66620,AT5G04340,AT5G62460,AT1G08050,AT3G62240,AT1G23730,AT5G55970,AT3G53600,AT2G32250,AT1G34370,AT3G46620,AT2G37430,AT2G42360,AT2G35910,AT2G27660,AT4G35480,AT2G42350,AT2G28710,AT5G42140,AT5G43170,AT3G07780,AT1G10650…
GO:0009941	chloroplast envelope	0.990476	AT3G08640
GO:0005507	copper ion binding	0.993127	AT5G44070,AT2G02850,AT2G44790,AT5G20230,AT4G39830
GO:0016887	ATPase activity	0.99599	AT2G46620,AT1G03905,AT3G24530,AT4G30490,AT1G74310,AT4G30190,AT3G28540,AT4G25835,AT5G57480,AT3G50930,AT3G47060
GO:0008233	peptidase activity	0.996017	AT4G09560
GO:0003924	GTPase activity	0.997363	AT4G34460,AT3G61760
GO:0031225	anchored to membrane	0.999933	AT2G22470,AT5G04310,AT3G07390,AT2G46330,AT1G24140,AT3G04010,AT3G61980,AT3G04640,AT3G16860,AT1G70170,AT1G74790,AT5G62630,AT3G51330,AT2G44790,AT4G36010,AT1G23040,AT4G28085,AT5G19250,AT5G20230,AT3G22600,AT2G17120,AT5G64310,AT2G17760,AT1G65240
GO:0016021	integral to membrane	1	AT3G13100,AT1G29330,AT2G41420,AT5G13750,AT5G24030,AT3G25610,AT4G25350,AT4G27970,AT1G35350,AT3G45060,AT5G27430,AT2G24170,AT1G14730,AT5G05570,AT5G57060,AT4G23700,AT1G26130,AT2G03240,AT5G11210,AT1G28010,AT3G62150,AT2G29110,AT4G00900,AT1G78000,AT5G13550,AT5G47910,AT2G41490,AT3G53780,AT1G05300,AT1G13210,AT5G02630,AT5G08335,AT1G64170,AT3G07190,AT5G50440,AT1G61800
GO:0003723	RNA binding	1	AT1G09140,AT3G49130,AT3G52120,AT3G19130,AT3G02320,AT1G60650,AT2G22100,AT5G55100
GO:0003735	structural constituent of ribosome	1	AT3G57490,AT1G29970,AT2G39390,AT5G39850,AT5G39785,AT1G80750,AT1G66580
GO:0045454	cell redox homeostasis	1	AT3G24170,AT1G04980,AT1G77510,AT3G54960,AT3G08710,AT1G21750,AT1G60420,AT3G51030
GO:0009821	alkaloid biosynthetic process	1	AT3G51440,AT3G51450
GO:0003756	protein disulfide isomerase activity	1	AT2G32920,AT1G77510,AT1G21750
GO:0006499	N-terminal protein myristoylation	1	AT5G47100,AT2G47730,AT1G57700,AT1G07630,AT1G63350,AT2G26190,AT1G10410,AT2G17110,AT5G25440,AT3G54030,AT3G05050,AT5G67250,AT5G63880,AT1G02940,AT3G01290,AT1G77500,AT5G39580,AT5G07910,AT3G20340,AT4G21940,AT2G28930,AT3G08870,AT5G04870,AT3G53180,AT3G20410,AT4G10140,AT1G04200,AT4G23700,AT3G22950,AT1G15890,AT3G28850,AT4G20110,AT4G17615,AT3G08710,AT3G44630,AT5G24430,AT2G30400,AT2G39660,AT4G35600,AT1G76600…
GO:0008544	epidermis development	1	AT4G20140
GO:0006817	phosphate transport	1	AT3G52190
GO:0005216	ion channel activity	1	AT1G01340,AT3G17700,AT4G01010
GO:0009697	salicylic acid biosynthetic process	1	AT1G74710,AT4G39030
GO:0019787	small conjugating protein ligase activity	1	AT2G22890,AT3G15355
GO:0019684	photosynthesis, light reaction	1	AT3G09490
GO:0009052	pentose-phosphate shunt, non-oxidative branch	1	AT3G02360,AT5G41670,AT5G13420,AT2G45290
GO:0006810	transport	1	AT3G13050,AT1G07030,AT5G48970,AT5G13750,AT3G22910,AT5G04930,AT4G36640,AT3G25610,AT4G13510,AT3G54110,AT5G47730,AT3G45060,AT5G01340,AT4G18910,AT4G21560,AT4G30190,AT2G47490,AT5G27520,AT2G20780,AT4G37640,AT4G36670,AT3G24840,AT1G14560,AT1G26130,AT1G27770,AT4G32400,AT2G32670,AT5G15640,AT3G57330,AT1G28010,AT1G75170,AT2G39480,AT2G22500,AT3G62150,AT3G10960,AT4G08690,AT5G10190,AT5G13490,AT5G13550,AT5G10820…
GO:0006990	positive regulation of gene-specific transcription involved in unfolded protein response	1	AT3G10800
GO:0033014	tetrapyrrole biosynthetic process	1	AT5G26030,AT1G09940
GO:0010119	regulation of stomatal movement	1	AT1G66340,AT1G64060,AT2G17290
GO:0016310	phosphorylation	1	AT5G26340,AT2G14750,AT4G39940,AT4G15530,AT3G01640,AT4G01370
GO:0046109	uridine biosynthetic process	1	AT1G71100
GO:0004657	proline dehydrogenase activity	1	AT5G38710
GO:0015398	high affinity secondary active ammonium transmembrane transporter activity	1	AT2G38290
GO:0004221	ubiquitin thiolesterase activity	1	AT2G24640
GO:0009407	toxin catabolic process	1	AT2G47730,AT2G30870,AT2G29480,AT2G29470,AT1G74590,AT1G02940,AT1G17170,AT2G29490,AT3G09270,AT1G69930,AT2G29440,AT1G10370,AT2G29460,AT1G27130
GO:0016131	brassinosteroid metabolic process	1	AT1G17060
GO:0048015	phosphoinositide-mediated signaling	1	AT5G63980
GO:0004591	oxoglutarate dehydrogenase (succinyl-transferring) activity	1	AT3G55410
GO:0050242	pyruvate, phosphate dikinase activity	1	AT4G15530
GO:0005355	glucose transmembrane transporter activity	1	AT3G18830
GO:0048481	ovule development	1	AT3G45640
GO:0008283	cell proliferation	1	AT2G22860,AT5G65870,AT3G49780
GO:0016442	RNA-induced silencing complex	1	AT5G61780
GO:0010293	abscisic aldehyde oxidase activity	1	AT2G27150
GO:0030570	pectate lyase activity	1	AT5G04310
GO:0006122	mitochondrial electron transport, ubiquinol to cytochrome c	1	AT5G25450
GO:0008428	ribonuclease inhibitor activity	1	AT5G56260
GO:0010098	suspensor development	1	AT1G01040
GO:0005792	microsome	1	AT2G40890,AT3G26830,AT5G61790
GO:0051726	regulation of cell cycle	1	AT4G14220
GO:0009526	plastid envelope	1	AT5G01500
GO:0008515	sucrose transmembrane transporter activity	1	AT2G02860
GO:0015706	nitrate transport	1	AT5G50200
GO:0007623	circadian rhythm	1	AT2G44680
GO:0004081	bis(5'-nucleosyl)-tetraphosphatase (asymmetrical) activity	1	AT1G30110
GO:0019468	nopaline catabolic process	1	AT5G52810
GO:0042651	thylakoid membrane	1	AT4G05390,AT5G01500
GO:0019853	L-ascorbic acid biosynthetic process	1	AT5G55120
GO:0030154	cell differentiation	1	AT2G22860,AT5G65870,AT3G49780
GO:0005750	mitochondrial respiratory chain complex III	1	AT5G25450
GO:0015937	coenzyme A biosynthetic process	1	AT1G60440
GO:0015086	cadmium ion transmembrane transporter activity	1	AT1G59870
GO:0015865	purine nucleotide transport	1	AT5G13490
GO:0019761	glucosinolate biosynthetic process	1	AT1G24100,AT2G22330
GO:0004476	mannose-6-phosphate isomerase activity	1	AT1G67070
GO:0019752	carboxylic acid metabolic process	1	AT5G17330
GO:0004031	aldehyde oxidase activity	1	AT2G27150,AT5G20960
GO:0008324	cation transmembrane transporter activity	1	AT1G55910,AT1G05300
GO:0003860	3-hydroxyisobutyryl-CoA hydrolase activity	1	AT1G06550
GO:0004556	alpha-amylase activity	1	AT1G76130
GO:0004363	glutathione synthase activity	1	AT5G27380
GO:0006118	electron transport	1	AT1G06830,AT5G17770,AT3G48890,AT2G02850,AT2G32920,AT3G09940,AT4G05390,AT3G22370,AT1G12200,AT4G10040,AT3G28850,AT5G54500,AT4G05020,AT2G44790,AT2G45570,AT1G65840,AT5G53560,AT5G20230,AT1G32350,AT5G25450,AT2G46650,AT5G52240,AT5G03630,AT5G15490
GO:0015591	D-ribose transmembrane transporter activity	1	AT3G18830
GO:0009749	response to glucose stimulus	1	AT3G26090,AT1G31930,AT4G34390
GO:0016208	AMP binding	1	AT5G36880
GO:0004802	transketolase activity	1	AT2G45290
GO:0004108	citrate (SI)-synthase activity	1	AT2G44350
GO:0010337	regulation of salicylic acid metabolic process	1	AT1G28380,AT2G41010
GO:0015696	ammonium transport	1	AT2G38290,AT4G13510
GO:0050302	indole-3-acetaldehyde oxidase activity	1	AT2G27150,AT5G20960
GO:0050378	UDP-glucuronate 4-epimerase activity	1	AT4G12250
GO:0048530	fruit morphogenesis	1	AT5G45710
GO:0008909	isochorismate synthase activity	1	AT1G74710
GO:0005758	mitochondrial intermembrane space	1	AT3G15352
GO:0009850	auxin metabolic process	1	AT3G02875,AT5G54140,AT1G44350
GO:0006596	polyamine biosynthetic process	1	AT4G34710
GO:0051301	cell division	1	AT2G28350
GO:0009535	chloroplast thylakoid membrane	1	AT3G48890,AT1G74640,AT5G53560,AT2G43630
GO:0019648	formaldehyde assimilation via xylulose monophosphate cycle	1	AT2G45290
GO:0048471	perinuclear region of cytoplasm	1	AT3G10800
GO:0003840	gamma-glutamyltransferase activity	1	AT4G39640
GO:0008131	amine oxidase activity	1	AT4G29740,AT1G65840
GO:0010359	regulation of anion channel activity	1	AT2G17290
GO:0004758	serine C-palmitoyltransferase activity	1	AT4G36480
GO:0005358	high-affinity hydrogen:glucose symporter activity	1	AT5G26340
GO:0000103	sulfate assimilation	1	AT2G14750,AT4G39940,AT4G14680,AT1G62180,AT4G04610
GO:0009117	nucleotide metabolic process	1	AT3G01820,AT2G41880,AT3G57550
GO:0016702	oxidoreductase activity, acting on single donors with incorporation of molecular oxygen, incorporation of two atoms of oxygen	1	AT1G17420,AT1G72520
GO:0005347	ATP transmembrane transporter activity	1	AT5G01500
GO:0046488	phosphatidylinositol metabolic process	1	AT1G34260,AT1G10900
GO:0048544	recognition or rejection of self pollen	1	AT1G61400,AT4G27300,AT4G21380,AT1G61370,AT4G21390,AT1G61490,AT1G61380,AT2G19130,AT1G61360,AT1G61420,AT1G11330
GO:0050691	regulation of defense response to virus by host	1	AT1G80840,AT4G31800
GO:0015148	D-xylose transmembrane transporter activity	1	AT3G18830
GO:0006073	glucan metabolic process	1	AT4G30280,AT4G25810
GO:0003674	molecular_function	1	AT5G45410,AT5G13220,AT1G14330,AT1G72450,AT3G60680,AT4G36110,AT3G55470,AT4G24110,AT1G52200,AT3G13650,AT2G37110,AT1G44800,AT5G51440,AT3G48020,AT3G16220,AT1G20100,AT1G30135,AT3G21080,AT3G26470,AT1G75860,AT4G34180,AT1G75810,AT5G46230,AT3G28930,AT2G22470,AT5G57910,AT4G20000,AT4G29330,AT5G47870,AT4G32140,AT3G62780,AT1G53380,AT2G44360,AT3G53270,AT1G49000,AT1G03660,AT5G18150,AT4G27350,AT2G21180,AT2G29500…
GO:0019725	cellular homeostasis	1	AT5G61900,AT3G61190
GO:0006511	ubiquitin-dependent protein catabolic process	1	AT4G23570,AT2G24640,AT4G03510,AT4G30640,AT3G17000,AT5G01720,AT5G43190
GO:0008605	protein kinase CK2 regulator activity	1	AT2G44680
GO:0010105	negative regulation of ethylene mediated signaling pathway	1	AT1G50640,AT3G04580,AT1G66340,AT5G03730,AT3G15210
GO:0031520	plasma membrane of cell tip	1	AT3G51460
GO:0004525	ribonuclease III activity	1	AT1G01040
GO:0030655	beta-lactam antibiotic catabolic process	1	AT5G24810
GO:0006540	glutamate decarboxylation to succinate	1	AT5G17330
GO:0051238	sequestering of metal ion	1	AT2G04040
GO:0006376	mRNA splice site selection	1	AT1G09140
GO:0015168	glycerol transmembrane transporter activity	1	AT3G18830
GO:0006526	arginine biosynthetic process	1	AT4G37670
GO:0005046	KDEL sequence binding	1	AT1G29330
GO:0019421	sulfate reduction, APS pathway	1	AT4G04610
GO:0016616	oxidoreductase activity, acting on the CH-OH group of donors, NAD or NADP as acceptor	1	AT4G34200
GO:0004751	ribose-5-phosphate isomerase activity	1	AT1G71100
GO:0006944	membrane fusion	1	AT5G16830,AT5G61210,AT3G52400,AT4G02195,AT3G11820,AT3G05710,AT5G50440
GO:0003997	acyl-CoA oxidase activity	1	AT4G16760
GO:0010112	regulation of systemic acquired resistance	1	AT1G02450
GO:0051252	regulation of RNA metabolic process	1	AT5G56260
GO:0015784	GDP-mannose transport	1	AT2G13650
GO:0006108	malate metabolic process	1	AT5G11670,AT4G00570
GO:0047334	diphosphate-fructose-6-phosphate 1-phosphotransferase activity	1	AT1G76550
GO:0005737	cytoplasm	1	AT5G52510,AT2G26560,AT4G29810,AT1G77840,AT3G16220,AT2G22470,AT1G30270,AT2G30870,AT2G29480,AT2G29470,AT2G37040,AT5G25440,AT1G74590,AT1G09940,AT5G67250,AT1G02940,AT4G18950,AT5G23520,AT1G17170,AT3G48690,AT4G14350,AT5G48150,AT1G51660,AT5G54160,AT2G39660,AT3G53260,AT1G64280,AT5G19890,AT1G76040,AT3G01640,AT4G37670,AT1G71100,AT2G27500,AT2G24200,AT2G29490,AT3G20510,AT2G44180,AT3G09270,AT5G54650,AT3G10800…
GO:0004656	procollagen-proline 4-dioxygenase activity	1	AT3G06300
GO:0006006	glucose metabolic process	1	AT5G40760,AT1G24280
GO:0006014	D-ribose metabolic process	1	AT5G51830
GO:0008150	biological_process	1	AT5G45410,AT1G14330,AT1G28680,AT3G60680,AT3G55470,AT4G24110,AT5G11730,AT1G52200,AT2G37110,AT3G48020,AT5G60950,AT1G20100,AT1G80290,AT4G39820,AT1G30135,AT3G21080,AT3G26470,AT1G75860,AT4G34180,AT1G75810,AT5G46230,AT1G19380,AT3G12360,AT5G57910,AT5G63330,AT4G20000,AT5G47870,AT1G68470,AT4G32140,AT2G27580,AT3G62780,AT1G53380,AT2G44360,AT5G20400,AT3G53270,AT1G49000,AT5G44720,AT1G03660,AT4G14630,AT5G18150…
GO:0008202	steroid metabolic process	1	AT5G02100,AT4G08180,AT5G59420
GO:0004805	trehalose-phosphatase activity	1	AT5G65140
GO:0009750	response to fructose stimulus	1	AT1G31930,AT4G34390
GO:0008033	tRNA processing	1	AT3G02320
GO:0047631	ADP-ribose diphosphatase activity	1	AT4G12720
GO:0050665	hydrogen peroxide biosynthetic process	1	AT1G66340,AT1G64060
GO:0016629	12-oxophytodienoate reductase activity	1	AT2G06050
GO:0004781	sulfate adenylyltransferase (ATP) activity	1	AT4G14680,AT3G22890
GO:0019683	glyceraldehyde-3-phosphate catabolic process	1	AT1G74030
GO:0006855	multidrug transport	1	AT1G15520,AT3G23550,AT4G23030,AT1G59870,AT1G66780,AT5G52050
GO:0006950	response to stress	1	AT5G47100,AT1G77280,AT2G23680,AT3G26680,AT1G16540,AT1G62740,AT1G21590,AT2G01180,AT4G12400,AT2G21620,AT5G61560,AT4G01370,AT3G45640
GO:0005829	cytosol	1	AT5G16970,AT1G68760,AT4G22780,AT1G64660,AT3G09920,AT1G30270,AT1G12360,AT3G12580,AT4G25350,AT5G19550,AT1G21130,AT5G16570,AT1G23730,AT1G55920,AT3G09940,AT2G46270,AT1G45145,AT5G40760,AT4G15530,AT5G12030,AT4G12720,AT5G54160,AT1G35580,AT1G33030,AT3G16050,AT1G67980,AT5G27380,AT1G79690,AT5G49480,AT1G07890,AT5G37600,AT2G35930,AT1G21120,AT2G04430,AT3G09440,AT3G51030,AT4G34050,AT5G49570,AT5G03630,AT1G21100…
GO:0004776	succinate-CoA ligase (GDP-forming) activity	1	AT5G08300
GO:0016165	lipoxygenase activity	1	AT1G55020,AT1G17420,AT1G72520
GO:0016998	cell wall catabolic process	1	AT2G43610,AT1G02360,AT5G08200,AT2G33580,AT4G01700,AT5G62150,AT2G43570,AT3G47540,AT2G17120,AT2G23770,AT2G43590
GO:0004301	epoxide hydrolase activity	1	AT4G02340
GO:0005802	trans-Golgi network	1	AT4G20110,AT4G02195
GO:0000245	spliceosome assembly	1	AT1G09140
GO:0050821	protein stabilization	1	AT5G56030,AT5G51700
GO:0000781	chromosome, telomeric region	1	AT5G13820
GO:0009968	negative regulation of signal transduction	1	AT5G63980
GO:0010398	xylogalacturonan metabolic process	1	AT5G33290
GO:0010197	polar nucleus fusion	1	AT4G33050
GO:0030968	endoplasmic reticulum unfolded protein response	1	AT4G34460,AT1G42990,AT2G02810
GO:0009956	radial pattern formation	1	AT3G54220
GO:0030422	RNA interference, production of siRNA	1	AT1G01040
GO:0004128	cytochrome-b5 reductase activity	1	AT5G17770
GO:0005789	endoplasmic reticulum membrane	1	AT3G04580,AT1G66340,AT4G37640,AT5G53560,AT2G02810,AT5G03730
GO:0019575	sucrose catabolic process, using beta-fructofuranosidase	1	AT1G22650,AT5G51830
GO:0005575	cellular_component	1	AT5G45410,AT5G13220,AT3G46230,AT1G14330,AT3G44110,AT1G28680,AT3G51920,AT1G22340,AT1G24100,AT2G38870,AT3G60680,AT3G55470,AT4G27270,AT4G24110,AT2G37110,AT2G42060,AT5G18750,AT4G39820,AT1G30135,AT3G21080,AT3G26470,AT1G75860,AT5G11670,AT1G02500,AT5G55120,AT5G46230,AT3G28930,AT2G18350,AT5G44070,AT3G48080,AT3G12360,AT4G25390,AT5G57910,AT1G35670,AT5G63330,AT4G20000,AT4G29330,AT1G10050,AT3G14990,AT5G52750…
GO:0030397	membrane disassembly	1	AT1G55020
GO:0015204	urea transmembrane transporter activity	1	AT5G45380
GO:0043091	L-arginine import	1	AT4G21120
GO:0005618	cell wall	1	AT4G30280,AT1G79670,AT4G02330,AT5G64120,AT4G25810,AT5G54650
GO:0016043	cellular component organization	1	AT1G59910
GO:0005471	ATP:ADP antiporter activity	1	AT5G13490
GO:0004165	dodecenoyl-CoA delta-isomerase activity	1	AT1G65520
GO:0051740	ethylene binding	1	AT3G04580,AT1G66340
GO:0048829	root cap development	1	AT2G28350
GO:0031540	regulation of anthocyanin biosynthetic process	1	AT2G28350
GO:0004467	long-chain-fatty-acid-CoA ligase activity	1	AT5G27600
GO:0010182	sugar mediated signaling	1	AT1G66340,AT1G16540,AT5G03730
GO:0015992	proton transport	1	AT3G22910,AT4G30190,AT1G27770,AT3G57330,AT3G63380
GO:0035196	gene silencing by miRNA, production of miRNAs	1	AT1G01040
GO:0008219	cell death	1	AT2G17480,AT3G45290,AT2G39200,AT1G64280,AT1G61560,AT1G29690,AT1G11310,AT4G14400
GO:0031365	N-terminal protein amino acid modification	1	AT2G44180
GO:0009986	cell surface	1	AT1G16150
GO:0006863	purine transport	1	AT1G19770
GO:0048765	root hair cell differentiation	1	AT2G22475
GO:0009926	auxin polar transport	1	AT1G69960
GO:0009605	response to external stimulus	1	AT4G11280
GO:0015144	carbohydrate transmembrane transporter activity	1	AT3G13050,AT5G26340,AT1G08930,AT2G20780,AT4G36670,AT2G02860,AT5G10190,AT3G19930,AT5G44370,AT3G18830
GO:0004559	alpha-mannosidase activity	1	AT1G30000
GO:0032107	regulation of response to nutrient levels	1	AT5G13080
GO:0050373	UDP-arabinose 4-epimerase activity	1	AT1G30620
GO:0009815	1-aminocyclopropane-1-carboxylate oxidase activity	1	AT1G05010
GO:0000902	cell morphogenesis	1	AT1G13180
GO:0015934	large ribosomal subunit	1	AT1G80750
GO:0004665	prephenate dehydrogenase (NADP+) activity	1	AT5G34930
GO:0016844	strictosidine synthase activity	1	AT1G74000,AT3G51440,AT3G51450,AT1G74020,AT1G74010
GO:0008519	ammonium transmembrane transporter activity	1	AT2G38290,AT4G13510
GO:0008601	protein phosphatase type 2A regulator activity	1	AT3G26020,AT3G21650
GO:0017004	cytochrome complex assembly	1	AT4G01660
GO:0032440	2-alkenal reductase activity	1	AT5G16970
GO:0046873	metal ion transmembrane transporter activity	1	AT1G55910,AT1G05300
GO:0010186	positive regulation of cellular defense response	1	AT5G61900
GO:0019690	pyrimidine deoxyribonucleoside interconversion	1	AT3G07800
GO:0015946	methanol oxidation	1	AT5G24840
GO:0006461	protein complex assembly	1	AT3G51890
GO:0003747	translation release factor activity	1	AT5G47880
GO:0009231	riboflavin biosynthetic process	1	AT5G64300
GO:0016868	intramolecular transferase activity, phosphotransferases	1	AT5G18070
GO:0005795	Golgi stack	1	AT1G76970,AT3G09020,AT1G21380
GO:0008864	formyltetrahydrofolate deformylase activity	1	AT1G31220
GO:0046621	negative regulation of organ growth	1	AT1G19270
GO:0009856	pollination	1	AT2G02850
GO:0004402	histone acetyltransferase activity	1	AT1G55970
GO:0006916	anti-apoptosis	1	AT5G47120
GO:0004067	asparaginase activity	1	AT3G16150
GO:0016759	cellulose synthase activity	1	AT5G16910
GO:0019898	extrinsic to membrane	1	AT2G01650
GO:0005365	myo-inositol transmembrane transporter activity	1	AT3G18830
GO:0019415	acetate biosynthetic process from carbon monoxide	1	AT5G24840
GO:0009744	response to sucrose stimulus	1	AT3G49620,AT1G67070,AT1G31930,AT4G34390,AT5G03730
GO:0010155	regulation of proton transport	1	AT4G27500
GO:0006071	glycerol metabolic process	1	AT3G17770
GO:0003958	NADPH-hemoprotein reductase activity	1	AT4G30210
GO:0005525	GTP binding	1	AT1G09630,AT4G18430,AT3G21700,AT5G45130,AT4G30600,AT5G64990,AT5G47960,AT5G45750,AT1G09180,AT3G22950,AT1G72660,AT3G61760,AT5G59150,AT5G17060,AT5G54840,AT5G47200,AT4G39890,AT5G65270,AT3G15060
GO:0005351	sugar:hydrogen symporter activity	1	AT3G13050,AT5G26340,AT1G08930,AT2G20780,AT4G36670,AT2G02860,AT5G10190,AT3G19930,AT5G44370,AT3G18830
GO:0032313	regulation of Rab GTPase activity	1	AT3G49350,AT5G54780,AT5G53570
GO:0008415	acyltransferase activity	1	AT1G75020,AT2G28630,AT1G01120,AT5G43760,AT5G55070,AT1G02390,AT4G26910,AT4G01950
GO:0006012	galactose metabolic process	1	AT4G25900
GO:0015904	tetracycline transport	1	AT5G13750
GO:0010118	stomatal movement	1	AT5G47100,AT1G30270,AT1G74710,AT1G16540,AT4G17615
GO:0006777	Mo-molybdopterin cofactor biosynthetic process	1	AT2G31955,AT5G20990
GO:0006949	syncytium formation	1	AT1G26770
GO:0009607	response to biotic stimulus	1	AT1G15520,AT2G22300,AT4G01370
GO:0006571	tyrosine biosynthetic process	1	AT5G34930
GO:0008565	protein transporter activity	1	AT2G45070,AT2G17980,AT1G12360,AT1G76970,AT2G34840,AT3G60540,AT1G21380,AT3G51890,AT4G12120
GO:0048767	root hair elongation	1	AT2G26650
GO:0015576	sorbitol transmembrane transporter activity	1	AT3G18830
GO:0000786	nucleosome	1	AT3G53650,AT3G09480,AT5G02560,AT2G30620
GO:0000169	activation of MAPK activity during osmolarity sensing	1	AT3G45640
GO:0015370	solute:sodium symporter activity	1	AT5G45380
GO:0030173	integral to Golgi membrane	1	AT5G16910,AT2G20370
GO:0010310	regulation of hydrogen peroxide metabolic process	1	AT3G52430,AT3G48090
GO:0004124	cysteine synthase activity	1	AT3G59760
GO:0006099	tricarboxylic acid cycle	1	AT2G44350
GO:0008809	carnitine racemase activity	1	AT1G65520
GO:0009001	serine O-acetyltransferase activity	1	AT1G55920,AT3G13110
GO:0006644	phospholipid metabolic process	1	AT2G01180
GO:0006955	immune response	1	AT1G29690
GO:0008514	organic anion transmembrane transporter activity	1	AT3G11320,AT5G44370,AT1G77610
GO:0010319	stromule	1	AT2G47730
GO:0016020	membrane	1	AT1G19770,AT5G52450,AT3G13050,AT2G26560,AT1G44800,AT5G26340,AT1G05170,AT1G63830,AT1G68470,AT4G32140,AT1G55910,AT3G22910,AT3G09920,AT1G59740,AT3G12740,AT4G03510,AT3G07680,AT2G29120,AT3G25610,AT4G23190,AT1G77380,AT5G46330,AT1G08930,AT5G16830,AT5G19980,AT4G13510,AT3G48570,AT3G23550,AT5G48400,AT4G24920,AT1G42470,AT1G29310,AT2G44490,AT3G61190,AT2G41705,AT3G01290,AT1G50740,AT2G36330,AT5G39990,AT4G39030…
GO:0009846	pollen germination	1	AT4G02350
GO:0046470	phosphatidylcholine metabolic process	1	AT4G11840,AT4G00240
GO:0010256	endomembrane organization	1	AT2G20370
GO:0019005	SCF ubiquitin ligase complex	1	AT4G23570
GO:0008026	ATP-dependent helicase activity	1	AT1G01040
GO:0008142	oxysterol binding	1	AT5G02100,AT4G08180,AT5G59420
GO:0015297	antiporter activity	1	AT3G23550,AT4G39030,AT1G66780,AT5G52050,AT2G04040,AT1G61800
GO:0009805	coumarin biosynthetic process	1	AT2G40890
GO:0009939	positive regulation of gibberellic acid mediated signaling	1	AT3G63010
GO:0003987	acetate-CoA ligase activity	1	AT5G36880
GO:0019344	cysteine biosynthetic process	1	AT3G13110,AT3G59760
GO:0016291	acyl-CoA thioesterase activity	1	AT5G48370,AT1G48320
GO:0043631	RNA polyadenylation	1	AT2G25850
GO:0009567	double fertilization forming a zygote and endosperm	1	AT2G47470,AT5G02100
GO:0015399	primary active transmembrane transporter activity	1	AT5G63850
GO:0042128	nitrate assimilation	1	AT5G16570,AT5G37600
GO:0019656	glucose catabolic process to D-lactate and ethanol	1	AT3G02360,AT5G41670,AT1G74030
GO:0048653	anther development	1	AT2G02850
GO:0004749	ribose phosphate diphosphokinase activity	1	AT2G35390,AT1G10700
GO:0004801	transaldolase activity	1	AT5G13420
GO:0007050	cell cycle arrest	1	AT3G24810
GO:0047205	quinate O-hydroxycinnamoyltransferase activity	1	AT5G48930
GO:0005746	mitochondrial respiratory chain	1	AT4G01660
GO:0008631	induction of apoptosis by oxidative stress	1	AT4G11280
GO:0051938	L-glutamate import	1	AT4G21120
GO:0046872	metal ion binding	1	AT5G52750,AT4G14630,AT1G09560,AT5G03380,AT2G35730,AT1G17420,AT3G57460,AT2G36950,AT5G60800,AT5G52760,AT1G72520,AT4G35060
GO:0009116	nucleoside metabolic process	1	AT4G24350
GO:0046685	response to arsenic	1	AT5G44070,AT5G52640,AT4G13180
GO:0006334	nucleosome assembly	1	AT3G53650,AT3G09480,AT5G02560,AT2G30620
GO:0008536	Ran GTPase binding	1	AT5G42140
GO:0009853	photorespiration	1	AT3G54110
GO:0000257	nitrilase activity	1	AT5G22300
GO:0043269	regulation of ion transport	1	AT3G03000
GO:0007169	transmembrane receptor protein tyrosine kinase signaling pathway	1	AT1G35710,AT1G66830,AT2G31880,AT5G46330,AT5G20480,AT1G29750,AT5G58150,AT1G06840,AT2G24130,AT2G02220,AT3G02880,AT3G28450,AT3G47570,AT4G39270,AT5G41180,AT1G73080,AT5G01950,AT1G72300,AT5G63410,AT1G09970,AT4G20140,AT1G74360
GO:0042254	ribosome biogenesis	1	AT2G39390
GO:0031012	extracellular matrix	1	AT2G22860,AT5G65870,AT3G49780
GO:0043130	ubiquitin binding	1	AT1G19270
GO:0003878	ATP citrate synthase activity	1	AT1G09430,AT2G44350
GO:0005856	cytoskeleton	1	AT3G03610
GO:0003856	3-dehydroquinate synthase activity	1	AT5G66120
GO:0006865	amino acid transport	1	AT4G35180,AT5G40780,AT1G80510,AT5G63850,AT3G55740
GO:0006779	porphyrin biosynthetic process	1	AT1G09940
GO:0004662	CAAX-protein geranylgeranyltransferase activity	1	AT2G39550
GO:0015152	glucose-6-phosphate transmembrane transporter activity	1	AT1G61800
GO:0008734	L-aspartate oxidase activity	1	AT5G14760
GO:0016207	4-coumarate-CoA ligase activity	1	AT1G20510,AT3G21230,AT1G51680,AT3G21240
GO:0009051	pentose-phosphate shunt, oxidative branch	1	AT3G02360,AT5G11670,AT5G41670,AT5G40760,AT1G24280
GO:0004871	signal transducer activity	1	AT3G48080,AT5G48150,AT1G64610,AT1G31930,AT5G02430,AT4G34390,AT3G48090,AT1G02900,AT5G42010
GO:0019201	nucleotide kinase activity	1	AT3G01820
GO:0005354	galactose transmembrane transporter activity	1	AT3G18830
GO:0051457	maintenance of protein location in nucleus	1	AT3G54220
GO:0006085	acetyl-CoA biosynthetic process	1	AT1G60440,AT1G09430
GO:0019658	glucose catabolic process to lactate and acetate	1	AT5G13420,AT1G74030,AT2G45290
GO:0000224	peptide-N4-(N-acetyl-beta-glucosaminyl)asparagine amidase activity	1	AT5G49570
GO:0005528	FK506 binding	1	AT5G48570,AT3G25230
GO:0047172	shikimate O-hydroxycinnamoyltransferase activity	1	AT5G48930
GO:0030308	negative regulation of cell growth	1	AT5G52240
GO:0015969	guanosine tetraphosphate metabolic process	1	AT3G14050
GO:0010375	stomatal complex patterning	1	AT1G51660,AT3G21220,AT3G45640
GO:0004034	aldose 1-epimerase activity	1	AT4G25900
GO:0016756	glutathione gamma-glutamylcysteinyltransferase activity	1	AT5G44070,AT1G03980,AT4G39640
GO:0005740	mitochondrial envelope	1	AT5G13490,AT1G32350
GO:0008901	ferredoxin hydrogenase activity	1	AT4G16440
GO:0030126	COPI vesicle coat	1	AT2G34840
GO:0031053	primary microRNA processing	1	AT1G01040
GO:0006536	glutamate metabolic process	1	AT5G17330
GO:0004439	phosphatidylinositol-4,5-bisphosphate 5-phosphatase activity	1	AT3G51460
GO:0016174	NAD(P)H oxidase activity	1	AT5G51060,AT1G64060,AT5G47910
GO:0003755	peptidyl-prolyl cis-trans isomerase activity	1	AT5G48570,AT4G17070,AT3G25230
GO:0012505	endomembrane system	1	AT5G35370,AT3G62600,AT5G20050,AT1G35710,AT3G13790,AT1G71190,AT4G04960,AT3G13100,AT2G46620,AT2G15080,AT3G44400,AT1G23840,AT3G05370,AT3G05200,AT4G23200,AT1G26380,AT3G13650,AT3G11080,AT5G60950,AT2G38860,AT2G43620,AT3G05660,AT1G80290,AT5G15730,AT1G66830,AT4G34180,AT1G75810,AT5G03700,AT3G28340,AT5G05340,AT1G05170,AT1G06830,AT4G37310,AT2G19190,AT2G24640,AT2G31880,AT3G13380,AT4G32140,AT3G11340,AT4G27300…
GO:0006631	fatty acid metabolic process	1	AT4G00360
GO:0005819	spindle	1	AT3G10730
GO:0016311	dephosphorylation	1	AT5G04540
GO:0009960	endosperm development	1	AT5G54650
GO:0006417	regulation of translation	1	AT2G40570
GO:0019139	cytokinin dehydrogenase activity	1	AT1G75450,AT4G29740
GO:0031304	intrinsic to mitochondrial inner membrane	1	AT2G29990
GO:0031347	regulation of defense response	1	AT1G80840,AT4G31800,AT2G25000,AT4G23810
GO:0000911	cytokinesis by cell plate formation	1	AT5G61210
GO:0008441	3'(2'),5'-bisphosphate nucleotidase activity	1	AT5G63980,AT5G64000,AT5G63990
GO:0005730	nucleolus	1	AT2G46400,AT2G33710,AT2G39660,AT1G76600,AT3G24500
GO:0005097	RAB GTPase activator activity	1	AT3G49350,AT5G54780,AT5G53570
GO:0006621	protein retention in ER lumen	1	AT1G29330
GO:0048510	regulation of timing of transition from vegetative to reproductive phase	1	AT5G03730
GO:0005911	cell-cell junction	1	AT1G70140,AT1G24150
GO:0018315	molybdenum incorporation into molybdenum-molybdopterin complex	1	AT1G16540
GO:0005788	endoplasmic reticulum lumen	1	AT1G09080
GO:0045489	pectin biosynthetic process	1	AT5G33290
GO:0009524	phragmoplast	1	AT4G14350,AT5G54650,AT3G10730
GO:0046910	pectinesterase inhibitor activity	1	AT3G47380
GO:0004797	thymidine kinase activity	1	AT3G07800
GO:0003872	6-phosphofructokinase activity	1	AT2G22480,AT4G26270
GO:0010026	trichome differentiation	1	AT2G22475
GO:0031539	positive regulation of anthocyanin metabolic process	1	AT1G09530
GO:0005980	glycogen catabolic process	1	AT1G76130
GO:0018401	peptidyl-proline hydroxylation to 4-hydroxy-L-proline	1	AT3G28480,AT4G33910,AT3G06300,AT2G17720
GO:0010167	response to nitrate	1	AT3G48450,AT5G50200
GO:0006413	translational initiation	1	AT4G01090
GO:0030198	extracellular matrix organization and biogenesis	1	AT3G07390
GO:0048024	regulation of nuclear mRNA splicing, via spliceosome	1	AT1G09140
GO:0009504	cell plate	1	AT5G61210
GO:0009700	indole phytoalexin biosynthetic process	1	AT3G26830
GO:0008168	methyltransferase activity	1	AT2G41380,AT1G21130,AT1G55450,AT5G10830,AT5G24840,AT4G22530,AT1G21120,AT3G54150,AT1G21100
GO:0016604	nuclear body	1	AT3G15210
GO:0019650	glucose catabolic process to butanediol	1	AT1G74030
GO:0005635	nuclear envelope	1	AT5G47120,AT3G10730
GO:0008253	5'-nucleotidase activity	1	AT2G23890
GO:0001584	rhodopsin-like receptor activity	1	AT2G41420
GO:0046938	phytochelatin biosynthetic process	1	AT5G44070,AT1G03980
GO:0005622	intracellular	1	AT5G59820,AT4G18430,AT3G21700,AT2G44360,AT3G57490,AT1G29970,AT4G36640,AT1G55460,AT5G04340,AT3G62240,AT2G44080,AT3G53600,AT2G37430,AT3G52120,AT2G28710,AT5G45750,AT3G24840,AT1G09180,AT3G22950,AT3G49350,AT1G55110,AT1G72660,AT3G59900,AT4G02200,AT2G24200,AT1G75170,AT3G57480,AT4G08690,AT3G45260,AT5G59150,AT3G51160,AT5G39785,AT5G53570,AT5G17060,AT5G54840,AT5G47200,AT3G43240,AT3G15060,AT2G21520
GO:0009686	gibberellin biosynthetic process	1	AT5G03730
GO:0003899	DNA-directed RNA polymerase activity	1	AT5G23710
GO:0042353	fucose biosynthetic process	1	AT2G20370
GO:0009543	chloroplast thylakoid lumen	1	AT1G51350,AT3G09490,AT1G79450
GO:0005524	ATP binding	1	AT1G31540,AT5G45060,AT1G35710,AT2G46620,AT3G44400,AT5G22690,AT1G66830,AT2G31880,AT1G63750,AT1G03905,AT4G36150,AT5G47050,AT4G24190,AT1G63350,AT4G11170,AT5G58720,AT3G12580,AT1G53350,AT1G66090,AT5G49910,AT5G46330,AT5G20480,AT5G44870,AT3G50950,AT5G11250,AT1G29750,AT1G09080,AT2G16790,AT2G14750,AT4G39940,AT4G23270,AT5G58150,AT1G06840,AT1G11100,AT2G24130,AT1G74310,AT5G56030,AT4G36140,AT1G33390,AT3G57760…
GO:0008146	sulfotransferase activity	1	AT1G74100,AT1G18590,AT5G07010
GO:0019458	methionine catabolic process via 2-oxobutanoate	1	AT1G64660
GO:0010102	lateral root morphogenesis	1	AT3G07390
GO:0042597	periplasmic space	1	AT4G16440
GO:0008076	voltage-gated potassium channel complex	1	AT2G24240
GO:0015250	water channel activity	1	AT4G18910
GO:0043234	protein complex	1	AT4G33430
GO:0009628	response to abiotic stimulus	1	AT4G03430,AT5G63980,AT4G26070
GO:0048316	seed development	1	AT2G16500,AT4G34710
GO:0031224	intrinsic to membrane	1	AT1G31540,AT5G45060,AT1G72920,AT3G44400,AT5G22690,AT5G44910,AT1G63750,AT4G36150,AT1G66090,AT1G57630,AT5G44870,AT5G11250,AT4G12020,AT5G45000,AT4G36140,AT5G45050,AT4G12010,AT3G04220,AT4G09420,AT3G44630,AT1G72900,AT1G51270,AT5G45090,AT1G63740,AT5G46520,AT5G36930,AT1G65390,AT5G17890,AT5G58120
GO:0009963	positive regulation of flavonoid biosynthetic process	1	AT5G48930
GO:0009094	L-phenylalanine biosynthetic process	1	AT1G08250,AT2G27820,AT3G44720
GO:0008272	sulfate transport	1	AT5G13550
GO:0019722	calcium-mediated signaling	1	AT3G51920,AT4G17615
GO:0004107	chorismate synthase activity	1	AT1G48850
GO:0004449	isocitrate dehydrogenase (NAD+) activity	1	AT5G03290,AT2G17130
GO:0008800	beta-lactamase activity	1	AT5G24810
GO:0007010	cytoskeleton organization and biogenesis	1	AT4G30160
GO:0042335	cuticle development	1	AT1G01120
GO:0031314	extrinsic to mitochondrial inner membrane	1	AT4G05020
GO:0006516	glycoprotein catabolic process	1	AT3G16150
GO:0009532	plastid stroma	1	AT5G49910
GO:0004352	glutamate dehydrogenase activity	1	AT5G07440
GO:0015575	mannitol transmembrane transporter activity	1	AT3G18830
GO:0015662	ATPase activity, coupled to transmembrane movement of ions, phosphorylative mechanism	1	AT5G04930,AT3G25610,AT1G59820,AT1G26130,AT1G13210
GO:0015770	sucrose transport	1	AT2G02860,AT3G19930
GO:0015712	hexose phosphate transport	1	AT1G61800
GO:0016597	amino acid binding	1	AT4G22780,AT4G34200
GO:0019469	octopine catabolic process	1	AT5G52810
GO:0006015	5-phosphoribose 1-diphosphate biosynthetic process	1	AT5G13420,AT2G45290
GO:0009228	thiamin biosynthetic process	1	AT3G14990
GO:0006415	translational termination	1	AT5G47880
GO:0051258	protein polymerization	1	AT4G13510
GO:0009423	chorismate biosynthetic process	1	AT4G39980
GO:0003935	GTP cyclohydrolase II activity	1	AT5G64300
GO:0005801	cis-Golgi network	1	AT1G29330
GO:0046786	viral replication complex formation and maintenance	1	AT2G02180
GO:0000249	C-22 sterol desaturase activity	1	AT2G34500
GO:0045333	cellular respiration	1	AT3G22370
GO:0045487	gibberellin catabolic process	1	AT1G02400,AT1G30040
GO:0010090	trichome morphogenesis	1	AT1G13180
GO:0051246	regulation of protein metabolic process	1	AT2G22890,AT3G15355
GO:0005217	intracellular ligand-gated ion channel activity	1	AT2G29120,AT5G48400,AT2G29100,AT5G11210,AT5G48410,AT2G29110,AT3G04110

## Sheet: Glazebrook GO terms Induced
Term	Desc	PCI PVAL	Genes
GO:0006468	protein amino acid phosphorylation	5.53862e-28	AT4G04500,AT1G11050,AT1G61360,AT2G33580,AT5G25930,AT5G11850,AT4G18250,AT4G18950,AT4G38470,AT1G18890,AT2G23450,AT4G23220,AT4G25390,AT3G09010,AT2G31880,AT2G05940,AT2G19130,AT4G23150,AT3G13380,AT4G32250,AT4G04490,AT4G11890,AT2G30360,AT1G61370,AT1G05100,AT4G21390,AT1G61610,AT2G32800
GO:0016301	kinase activity	1.10559e-22	AT4G04500,AT1G11050,AT2G25440,AT1G61360,AT2G33580,AT5G25930,AT5G11850,AT4G18250,AT4G18950,AT1G18890,AT2G23450,AT4G23220,AT4G25390,AT2G19190,AT3G09010,AT2G31880,AT2G05940,AT4G23150,AT4G32250,AT4G04490,AT4G11890,AT2G30360,AT1G61370,AT1G05100,AT1G61610
GO:0005975	carbohydrate metabolic process	1.05041e-13	AT1G65610,AT1G32170,AT4G25810,AT1G61810,AT2G14620,AT4G16260,AT1G61820,AT2G27500,AT4G19810
GO:0004364	glutathione transferase activity	2.13273e-13	AT2G29420,AT2G29490,AT2G29480,AT2G29470,AT2G29440,AT2G29460
GO:0007275	multicellular organismal development	1.27834e-09	AT4G27410,AT1G01720,AT2G43000,AT5G63790,AT1G69490
GO:0000162	tryptophan biosynthetic process	2.73218e-09	AT2G04400,AT5G05730,AT5G17990,AT3G54640
GO:0009908	flower development	8.09237e-09	AT3G44880,AT1G19850,AT4G23100,AT1G69490
GO:0009695	jasmonic acid biosynthetic process	2.68392e-08	AT1G17420,AT2G06050,AT1G55020
GO:0016126	sterol biosynthetic process	7.95729e-08	AT1G76490,AT5G24160,AT5G24150
GO:0006750	glutathione biosynthetic process	9.9627e-08	AT4G23100,AT5G27380
GO:0006629	lipid metabolic process	1.03492e-07	AT2G30550,AT2G39220,AT3G52430,AT1G54030
GO:0009790	embryonic development	1.61388e-07	AT1G19850,AT2G34630,AT4G02380
GO:0010150	leaf senescence	2.41621e-07	AT2G38860,AT3G52430,AT1G69490
GO:0004601	peroxidase activity	3.70373e-07	AT5G64120,AT2G37130,AT5G19890
GO:0019825	oxygen binding	4.03585e-07	AT4G37430,AT5G36220,AT4G37370,AT2G30770,AT2G34500,AT3G26220,AT3G26830,AT2G27690,AT4G37310,AT4G39950,AT2G24180
GO:0008559	xenobiotic-transporting ATPase activity	1.59371e-06	AT2G47000,AT1G30400
GO:0006457	protein folding	2.95111e-06	AT2G24860,AT5G12030,AT4G17070,AT5G02490
GO:0016847	1-aminocyclopropane-1-carboxylate synthase activity	3.18652e-06	AT4G11280,AT1G01480
GO:0006826	iron ion transport	3.73168e-06	AT5G01600,AT2G47600,AT2G40300
GO:0006508	proteolysis	4.48111e-06	AT3G02875,AT5G54140,AT1G24140,AT2G04160
GO:0009627	systemic acquired resistance	4.52213e-06	AT3G57260,AT3G52430,AT3G04720,AT2G14610
GO:0051287	NAD binding	8.04593e-06	AT4G12720,AT4G34200
GO:0045735	nutrient reservoir activity	9.96294e-06	AT4G24350,AT2G39220,AT1G09560,AT1G23040,AT4G14630
GO:0004672	protein kinase activity	1.05756e-05	AT4G38470,AT1G18890,AT2G19130,AT3G13380,AT2G30360,AT4G21390,AT2G32800
GO:0008483	transaminase activity	1.56468e-05	AT2G13810,AT2G24850
GO:0016563	transcription activator activity	2.47139e-05	AT4G27410,AT3G23240,AT4G17500,AT1G01720,AT2G31230,AT2G47190,AT5G47220
GO:0042803	protein homodimerization activity	3.10075e-05	AT4G12720,AT4G16780
GO:0004568	chitinase activity	3.66183e-05	AT2G43620,AT3G54420,AT2G43570,AT2G43590
GO:0016706	oxidoreductase activity, acting on paired donors, with incorporation or reduction of molecular oxygen, 2-oxoglutarate as one donor, and incorporation of one atom each of oxygen into both donors	4.2204e-05	AT1G17020,AT4G10500
GO:0009626	plant-type hypersensitive response	6.35841e-05	AT4G37990,AT4G12720,AT4G25230,AT3G54420
GO:0004553	hydrolase activity, hydrolyzing O-glycosyl compounds	0.000197761	AT3G13790,AT1G65610,AT3G57260,AT1G61810,AT4G16260,AT1G61820,AT2G27500,AT4G19810
GO:0020037	heme binding	0.000228175	AT2G46650,AT3G48890
GO:0009611	response to wounding	0.000244519	AT1G74020,AT2G02860,AT4G39980,AT1G17420,AT3G13790,AT2G34810,AT2G38870,AT4G11280,AT1G01720,AT2G37040,AT2G06050,AT5G05730,AT4G35770,AT1G55020,AT3G16470,AT2G24850
GO:0010260	organ senescence	0.000246609	AT1G17020
GO:0004338	glucan 1,3-beta-glucosidase activity	0.000260756	AT3G57260
GO:0008061	chitin binding	0.000267165	AT3G04720
GO:0010298	dihydrocamalexic acid decarboxylase activity	0.000275634	AT3G26830
GO:0047720	indoleacetaldoxime dehydratase activity	0.000275938	AT2G30770
GO:0008152	metabolic process	0.000336784	AT1G70290,AT5G55070,AT5G07440,AT1G05680,AT1G55510,AT3G46690,AT4G38470,AT5G65890,AT2G32150,AT4G26910,AT1G10070,AT4G13250,AT2G39220,AT1G08940,AT5G08300,AT4G33540,AT4G38540,AT4G15550
GO:0004497	monooxygenase activity	0.000360143	AT1G62570,AT3G26830,AT2G40890,AT4G38540
GO:0006569	tryptophan catabolic process	0.000445236	AT4G39950
GO:0009063	amino acid catabolic process	0.000445831	AT3G47340
GO:0051410	detoxification of nitrogen compound	0.000445931	AT5G22300
GO:0006751	glutathione catabolic process	0.000446329	AT4G39640
GO:0019499	cyanide metabolic process	0.000447027	AT5G22300
GO:0046482	para-aminobenzoic acid metabolic process	0.000447127	AT2G43820
GO:0004048	anthranilate phosphoribosyltransferase activity	0.000519886	AT5G17990
GO:0010211	IAA-Leu conjugate hydrolase activity	0.000535475	AT3G02875
GO:0010210	IAA-Phe conjugate hydrolase activity	0.000535475	AT3G02875
GO:0010178	IAA-amino acid conjugate hydrolase activity	0.000535619	AT5G54140
GO:0004425	indole-3-glycerol-phosphate synthase activity	0.000551268	AT2G04400
GO:0015559	multidrug efflux pump activity	0.000571919	AT4G39030
GO:0009973	adenylyl-sulfate reductase activity	0.0008	AT4G04610
GO:0030410	nicotianamine synthase activity	0.000820793	AT1G09240
GO:0003849	3-deoxy-7-phosphoheptulonate synthase activity	0.000820793	AT4G39980
GO:0004049	anthranilate synthase activity	0.000827586	AT5G05730
GO:0004066	asparagine synthase (glutamine-hydrolyzing) activity	0.000829876	AT3G47340
GO:0004126	cytidine deaminase activity	0.000830565	AT2G19570
GO:0006556	S-adenosylmethionine biosynthetic process	0.000891862	AT4G01850
GO:0009055	electron carrier activity	0.000908962	AT2G34810,AT4G20860,AT5G44380,AT1G30700,AT4G10040,AT2G27510
GO:0004478	methionine adenosyltransferase activity	0.00109409	AT4G01850
GO:0006564	L-serine biosynthetic process	0.00111259	AT4G35630
GO:0009617	response to bacterium	0.00113494	AT4G37990,AT5G01600,AT4G39980,AT1G33960,AT2G30770,AT5G05730,AT3G26830,AT3G28930,AT4G39950,AT5G02490
GO:0010262	somatic embryogenesis	0.00117758	AT3G54420
GO:0010386	lateral root primordium development	0.00122579	AT5G05730
GO:0050832	defense response to fungus	0.00125937	AT4G12470,AT2G38870,AT5G64120,AT2G38470,AT2G30770,AT2G37130,AT2G40140,AT4G23100
GO:0003700	transcription factor activity	0.00131115	AT4G27410,AT3G23240,AT4G17500,AT1G01720,AT4G16780,AT2G38470,AT1G43160,AT1G18570,AT1G19850,AT5G04340,AT2G38340,AT2G16720,AT1G06180,AT2G31230,AT5G67300,AT2G40140,AT2G28510,AT1G56650,AT2G43000,AT4G18170,AT2G29060,AT2G47190,AT1G10170,AT5G63790,AT5G47220,AT1G69490,AT4G22070
GO:0004675	transmembrane receptor protein serine/threonine kinase activity	0.00134288	AT4G18250
GO:0004161	dimethylallyltranstransferase activity	0.00136575	AT2G34630
GO:0048046	apoplast	0.00140713	AT1G32170,AT4G25810,AT1G09560,AT2G14620,AT4G39640,AT4G25000
GO:0010016	shoot morphogenesis	0.00149031	AT4G16780
GO:0004712	protein serine/threonine/tyrosine kinase activity	0.00158631	AT5G11850,AT4G18950,AT4G38470
GO:0004648	phosphoserine transaminase activity	0.00163666	AT4G35630
GO:0004838	tyrosine transaminase activity	0.00163711	AT2G24850
GO:0009081	branched chain family amino acid metabolic process	0.00178313	AT1G10070
GO:0030246	carbohydrate binding	0.00192389	AT1G61360,AT3G16530,AT2G02310,AT1G61370,AT1G61610
GO:0002213	defense response to insect	0.002015	AT1G61120,AT4G23100,AT3G52430
GO:0008652	amino acid biosynthetic process	0.00222618	AT2G37250
GO:0009561	megagametogenesis	0.00223602	AT4G34200
GO:0008299	isoprenoid biosynthetic process	0.00237889	AT1G76490
GO:0045543	gibberellin 2-beta-dioxygenase activity	0.00238347	AT1G30040
GO:0008453	alanine-glyoxylate transaminase activity	0.00245298	AT2G38400
GO:0004527	exonuclease activity	0.00265041	AT5G26940
GO:0004721	phosphoprotein phosphatase activity	0.00265675	AT1G05000
GO:0006857	oligopeptide transport	0.00267174	AT4G21680,AT3G47960,AT4G24120
GO:0008113	peptide-methionine-(S)-S-oxide reductase activity	0.0029201	AT4G21850
GO:0051603	proteolysis involved in cellular protein catabolic process	0.00318201	AT1G77000
GO:0004084	branched-chain-amino-acid transaminase activity	0.00327243	AT1G10070
GO:0010154	fruit development	0.00347136	AT3G44880
GO:0009225	nucleotide-sugar metabolic process	0.00355714	AT1G30620
GO:0008194	UDP-glycosyltransferase activity	0.00360859	AT1G05680,AT2G43820,AT3G46690,AT5G20830,AT4G15550
GO:0006520	amino acid metabolic process	0.00401338	AT5G07440
GO:0006355	regulation of transcription, DNA-dependent	0.00483716	AT3G23240,AT4G17500,AT4G16780,AT2G38470,AT1G43160,AT1G18570,AT2G38340,AT2G16720,AT1G06180,AT2G31230,AT2G02710,AT5G67300,AT4G18430,AT1G56650,AT4G18170,AT1G10170,AT5G47220,AT4G22070
GO:0003993	acid phosphatase activity	0.00530082	AT2G01890
GO:0040007	growth	0.00559727	AT1G17420,AT1G55020
GO:0006464	protein modification process	0.0061988	AT4G17470
GO:0030599	pectinesterase activity	0.00669821	AT1G11580,AT2G47550,AT2G45220
GO:0003779	actin binding	0.00742196	AT2G41740
GO:0009699	phenylpropanoid biosynthetic process	0.00800483	AT2G37040,AT2G40890
GO:0007568	aging	0.00815016	AT4G35770
GO:0016688	L-ascorbate peroxidase activity	0.00834322	AT4G08390
GO:0015450	P-P-bond-hydrolysis-driven protein transmembrane transporter activity	0.00841061	AT1G72750
GO:0009809	lignin biosynthetic process	0.00860241	AT1G67980,AT2G40890,AT1G09500
GO:0009073	aromatic amino acid family biosynthetic process	0.00863018	AT4G39980
GO:0030001	metal ion transport	0.0119465	AT2G23150,AT4G35060,AT2G36950
GO:0006828	manganese ion transport	0.0126984	AT2G23150
GO:0016798	hydrolase activity, acting on glycosyl bonds	0.0131838	AT1G32170,AT4G25810,AT2G14620
GO:0043617	cellular response to sucrose starvation	0.0147059	AT3G47340
GO:0045730	respiratory burst	0.0170213	AT5G64120
GO:0042409	caffeoyl-CoA O-methyltransferase activity	0.0175439	AT1G67980
GO:0006829	zinc ion transport	0.0188088	AT2G47600
GO:0006812	cation transport	0.0191073	AT2G47600,AT4G23700
GO:0006896	Golgi to vacuole transport	0.0198413	AT1G10290
GO:0046409	p-coumarate 3-hydroxylase activity	0.0199256	AT2G40890
GO:0004506	squalene monooxygenase activity	0.0201859	AT5G24150
GO:0004649	poly(ADP-ribose) glycohydrolase activity	0.0205944	AT2G31870
GO:0015927	trehalase activity	0.0205944	AT4G24040
GO:0004555	alpha,alpha-trehalase activity	0.0205944	AT4G24040
GO:0009813	flavonoid biosynthetic process	0.0214705	AT1G17020,AT2G40890
GO:0006839	mitochondrial transport	0.0219216	AT2G22500,AT4G28390
GO:0015691	cadmium ion transport	0.0220126	AT2G23150
GO:0006979	response to oxidative stress	0.0220369	AT4G12720,AT5G55070,AT2G21640,AT2G40000,AT4G08390,AT2G37040,AT3G30775,AT5G44380,AT5G19890,AT4G35770,AT4G02380,AT4G39640,AT4G17070,AT1G09940,AT2G29500
GO:0009816	defense response to bacterium, incompatible interaction	0.0222882	AT2G40000,AT3G44880,AT4G23100,AT3G52430,AT1G55020
GO:0016491	oxidoreductase activity	0.0269832	AT5G07440,AT5G21100,AT4G13250,AT4G13180,AT5G24160,AT2G38240,AT2G37770
GO:0006623	protein targeting to vacuole	0.0278422	AT4G20110
GO:0016298	lipase activity	0.0306991	AT3G52430,AT1G54030
GO:0015693	magnesium ion transport	0.0316436	AT2G47600
GO:0009927	histidine phosphotransfer kinase activity	0.0373401	AT3G21510
GO:0016758	transferase activity, transferring hexosyl groups	0.0402976	AT1G05680,AT2G43820,AT2G47180
GO:0009862	systemic acquired resistance, salicylic acid mediated signaling pathway	0.042471	AT3G52430
GO:0009736	cytokinin mediated signaling	0.0433749	AT2G40670,AT3G21510
GO:0009646	response to absence of light	0.0439438	AT3G47340,AT2G41100
GO:0015175	neutral amino acid transmembrane transporter activity	0.0448179	AT3G11900,AT5G63850
GO:0005886	plasma membrane	0.0449247	AT4G25230,AT2G02860,AT2G47000,AT4G25900,AT2G39200,AT4G20260,AT1G61560,AT2G47800,AT4G14630,AT3G02520
GO:0006891	intra-Golgi vesicle-mediated transport	0.0468227	AT1G76970
GO:0004143	diacylglycerol kinase activity	0.0481778	AT2G20900
GO:0007205	activation of protein kinase C activity	0.0484848	AT2G20900
GO:0004722	protein serine/threonine phosphatase activity	0.0501519	AT2G01890
GO:0019748	secondary metabolic process	0.0501885	AT4G10500
GO:0007264	small GTPase mediated signal transduction	0.0520861	AT5G54840,AT4G18430
GO:0051861	glycolipid binding	0.0521494	AT4G39670
GO:0003825	alpha,alpha-trehalose-phosphate synthase (UDP-forming) activity	0.0550332	AT1G70290
GO:0015173	aromatic amino acid transmembrane transporter activity	0.0555556	AT3G11900
GO:0009870	defense response signaling pathway, resistance gene-dependent	0.0564972	AT4G12720
GO:0010017	red or far red light signaling pathway	0.0580798	AT4G16780,AT2G37970
GO:0035265	organ growth	0.0583143	AT2G44080
GO:0016788	hydrolase activity, acting on ester bonds	0.0594559	AT4G16690,AT4G37150
GO:0008810	cellulase activity	0.0597996	AT3G57260
GO:0009817	defense response to fungus, incompatible interaction	0.060501	AT2G39200,AT1G61560,AT4G37150
GO:0004566	beta-glucuronidase activity	0.060504	AT5G34940
GO:0009413	response to flooding	0.0610577	AT5G20830
GO:0015692	lead ion transport	0.0622866	AT2G23150
GO:0048037	cofactor binding	0.0665723	AT4G34200
GO:0035251	UDP-glucosyltransferase activity	0.0727053	AT2G43820
GO:0016157	sucrose synthase activity	0.0736863	AT5G20830
GO:0004806	triacylglycerol lipase activity	0.0774876	AT2G30550,AT3G52430
GO:0008199	ferric iron binding	0.0809947	AT5G01600,AT2G40300
GO:0005576	extracellular region	0.0819494	AT4G14630,AT2G14610,AT4G25000
GO:0009610	response to symbiotic fungus	0.0821918	AT1G37130
GO:0030234	enzyme regulator activity	0.0845469	AT4G16500
GO:0005215	transporter activity	0.0923087	AT3G47780,AT3G47730,AT4G39030,AT4G21680,AT3G47960,AT4G36640
GO:0009269	response to desiccation	0.0962422	AT2G33380,AT2G46140
GO:0015976	carbon utilization	0.0978267	AT1G23730
GO:0046836	glycolipid transport	0.103008	AT4G39670
GO:0009718	anthocyanin biosynthetic process	0.1032	AT1G56650
GO:0006972	hyperosmotic response	0.107053	AT5G12030
GO:0009698	phenylpropanoid metabolic process	0.114405	AT4G30210
GO:0009408	response to heat	0.120207	AT5G52640,AT3G46230,AT4G23100,AT5G12030,AT2G47180,AT2G29500,AT5G02490
GO:0005516	calmodulin binding	0.127042	AT2G39200,AT1G61560,AT2G47190,AT5G26920
GO:0004683	calmodulin-dependent protein kinase activity	0.129746	AT1G18890
GO:0008289	lipid binding	0.13526	AT4G12470,AT4G22470
GO:0009873	ethylene mediated signaling pathway	0.138272	AT3G23240,AT2G31230,AT5G47220
GO:0009745	sucrose mediated signaling	0.142683	AT1G56650
GO:0017110	nucleoside-diphosphatase activity	0.142857	AT4G12720
GO:0000160	two-component signal transduction system (phosphorelay)	0.165283	AT3G21510
GO:0009268	response to pH	0.166667	AT2G30360
GO:0004564	beta-fructofuranosidase activity	0.168723	AT3G13790
GO:0005529	sugar binding	0.169634	AT4G21390
GO:0016757	transferase activity, transferring glycosyl groups	0.170232	AT1G70290,AT1G05680,AT2G43820,AT3G46690,AT4G24000,AT4G15550
GO:0000271	polysaccharide biosynthetic process	0.171202	AT4G24000
GO:0042631	cellular response to water deprivation	0.17498	AT4G02380
GO:0042594	response to starvation	0.18006	AT1G54710
GO:0005950	anthranilate synthase complex	0.181818	AT5G05730
GO:0009793	embryonic development ending in seed dormancy	0.182925	AT2G46140
GO:0016740	transferase activity	0.188374	AT4G24000,AT5G01210
GO:0016049	cell growth	0.18944	AT2G44080
GO:0009825	multidimensional cell growth	0.191735	AT1G69490
GO:0047558	3-cyanoalanine hydratase activity	0.2	AT5G22300
GO:0018822	nitrile hydratase activity	0.2	AT5G22300
GO:0001666	response to hypoxia	0.205288	AT3G52430
GO:0009642	response to light intensity	0.205456	AT1G10170
GO:0010039	response to iron ion	0.212121	AT5G01600,AT2G40300,AT4G24120
GO:0016481	negative regulation of transcription	0.219538	AT4G16780
GO:0051082	unfolded protein binding	0.223784	AT5G52640,AT2G24860,AT5G12030
GO:0006952	defense response	0.232842	AT1G17420,AT3G23240,AT2G37040,AT2G39200,AT4G39030,AT1G61560,AT2G32140,AT2G03760,AT1G55020,AT2G14610
GO:0015172	acidic amino acid transmembrane transporter activity	0.235854	AT5G63850
GO:0008506	sucrose:hydrogen symporter activity	0.240404	AT2G02860
GO:0042542	response to hydrogen peroxide	0.240655	AT5G01600,AT5G12030,AT2G47180,AT2G29500
GO:0009651	response to salt stress	0.243971	AT4G12720,AT2G33380,AT1G18570,AT2G16720,AT1G06180,AT5G67300,AT1G56650,AT2G47190,AT1G10170
GO:0003677	DNA binding	0.247082	AT3G23240,AT4G17500,AT4G16780,AT1G43160,AT1G18570,AT2G38340,AT2G16720,AT1G06180,AT2G31230,AT5G67300,AT2G28510,AT1G56650,AT2G47190,AT5G47220
GO:0042742	defense response to bacterium	0.248978	AT5G52640,AT4G12720,AT2G38470,AT2G30770,AT2G19190,AT1G10170
GO:0046029	mannitol dehydrogenase activity	0.25	AT4G37990
GO:0018456	aryl-alcohol dehydrogenase activity	0.25	AT4G37990
GO:0009641	shade avoidance	0.267477	AT4G16780
GO:0045941	positive regulation of transcription	0.270237	AT5G47220
GO:0005743	mitochondrial inner membrane	0.275386	AT2G22500,AT2G39970,AT4G28390,AT5G13490,AT1G72750
GO:0003824	catalytic activity	0.277494	AT1G54130,AT1G30620,AT4G16690,AT1G10070,AT1G08940,AT4G33540,AT4G34200
GO:0009644	response to high light intensity	0.281372	AT5G12030,AT2G47180,AT2G29500
GO:0000156	two-component response regulator activity	0.285657	AT2G40670
GO:0031348	negative regulation of defense response	0.289474	AT4G39030,AT3G52430
GO:0010540	basipetal auxin transport	0.297924	AT2G47000
GO:0017119	Golgi transport complex	0.307692	AT4G20110
GO:0005506	iron ion binding	0.310123	AT5G01600,AT1G17420,AT2G38240
GO:0009864	induced systemic resistance, jasmonic acid mediated signaling pathway	0.313756	AT5G47220
GO:0043565	sequence-specific DNA binding	0.31553	AT4G16780
GO:0000325	plant-type vacuole	0.32	AT4G14630
GO:0009058	biosynthetic process	0.322222	AT2G13810,AT2G24850
GO:0005887	integral to plasma membrane	0.323445	AT4G20110
GO:0031225	anchored to membrane	0.325687	AT2G44790,AT2G22470,AT3G16860,AT1G23040,AT1G24140
GO:0046914	transition metal ion binding	0.32974	AT2G46650,AT3G48890
GO:0009625	response to insect	0.330144	AT3G52430
GO:0005993	trehalose catabolic process	0.333333	AT4G24040
GO:0015996	chlorophyll catabolic process	0.333333	AT4G22920,AT3G44880
GO:0009851	auxin biosynthetic process	0.333333	AT5G05730,AT5G20960
GO:0030528	transcription regulator activity	0.347674	AT4G18890,AT2G40670
GO:0006869	lipid transport	0.352868	AT4G12470,AT4G22470
GO:0016787	hydrolase activity	0.36181	AT4G12720,AT2G01670,AT2G32150
GO:0003924	GTPase activity	0.373333	AT1G10290
GO:0000304	response to singlet oxygen	0.374179	AT1G61120
GO:0017089	glycolipid transporter activity	0.375	AT4G39670
GO:0051607	defense response to virus	0.377435	AT2G35980
GO:0030145	manganese ion binding	0.392298	AT1G09560,AT4G14630
GO:0005945	6-phosphofructokinase complex	0.4	AT4G26270
GO:0005432	calcium:sodium antiporter activity	0.4	AT2G47600
GO:0009624	response to nematode	0.407843	AT4G39030,AT3G11900,AT2G47800
GO:0042282	hydroxymethylglutaryl-CoA reductase activity	0.416667	AT1G76490
GO:0000302	response to reactive oxygen species	0.419772	AT4G02380
GO:0009639	response to red or far red light	0.419892	AT1G30040,AT2G32250
GO:0009414	response to water deprivation	0.420934	AT4G27410,AT2G47800,AT2G47190,AT5G63850
GO:0004834	tryptophan synthase activity	0.428571	AT3G54640
GO:0051707	response to other organism	0.44	AT3G52430,AT2G35980
GO:0009409	response to cold	0.453202	AT5G01600,AT3G57260,AT2G40140,AT4G20260,AT1G09560,AT4G02380,AT3G16470,AT5G20830
GO:0010286	heat acclimation	0.462665	AT1G77000
GO:0009652	thigmotropism	0.464706	AT2G41100
GO:0004888	transmembrane receptor activity	0.467742	AT2G32140
GO:0016021	integral to membrane	0.475645	AT2G36630,AT3G47420,AT1G23090,AT1G61800,AT4G23700,AT5G13550,AT2G17500
GO:0006813	potassium ion transport	0.482625	AT1G70300
GO:0016051	carbohydrate biosynthetic process	0.489084	AT2G47180
GO:0009735	response to cytokinin stimulus	0.491848	AT2G47000,AT4G16780,AT2G40670
GO:0009741	response to brassinosteroid stimulus	0.5	AT2G44080
GO:0016123	xanthophyll biosynthetic process	0.5	AT4G25700
GO:0008883	glutamyl-tRNA reductase activity	0.5	AT1G09940
GO:0003868	4-hydroxyphenylpyruvate dioxygenase activity	0.5	AT1G06570
GO:0047427	cyanoalanine nitrilase activity	0.5	AT5G22300
GO:0019567	arabinose biosynthetic process	0.5	AT1G30620
GO:0010188	response to microbial phytotoxin	0.5	AT1G10170
GO:0009739	response to gibberellin stimulus	0.500992	AT1G18570,AT2G16720,AT1G06180,AT5G67300,AT4G25000
GO:0009723	response to ethylene stimulus	0.517018	AT4G11280,AT1G18570,AT5G05730,AT2G16720,AT1G06180,AT5G67300,AT2G47190,AT3G04720
GO:0009832	plant-type cell wall biogenesis	0.527778	AT1G30620
GO:0005451	monovalent cation:proton antiporter activity	0.538462	AT4G23700
GO:0010305	leaf vascular tissue pattern formation	0.541667	AT1G19850
GO:0009615	response to virus	0.544908	AT3G04720
GO:0006875	cellular metal ion homeostasis	0.545455	AT2G23150
GO:0009737	response to abscisic acid stimulus	0.553766	AT4G27410,AT2G33380,AT1G18570,AT3G26830,AT2G16720,AT1G06180,AT5G67300,AT3G28210,AT2G47190,AT1G55020,AT4G25000
GO:0009826	unidimensional cell growth	0.558152	AT4G16780
GO:0004674	protein serine/threonine kinase activity	0.563768	AT2G31880
GO:0009759	indole glucosinolate biosynthetic process	0.571429	AT1G18570
GO:0010193	response to ozone	0.576923	AT4G12720,AT2G06050,AT4G23100
GO:0009630	gravitropism	0.590909	AT2G47000
GO:0004867	serine-type endopeptidase inhibitor activity	0.6	AT2G38870
GO:0009733	response to auxin stimulus	0.612585	AT2G47000,AT4G11280,AT4G16780,AT1G18570,AT1G19850,AT4G27260,AT2G45210,AT5G67300,AT2G04160
GO:0008643	carbohydrate transport	0.612707	AT3G47420
GO:0006783	heme biosynthetic process	0.614035	AT1G09940
GO:0009612	response to mechanical stimulus	0.615385	AT4G11280,AT2G41100
GO:0045551	cinnamyl-alcohol dehydrogenase activity	0.618182	AT1G09500
GO:0042545	cell wall modification	0.629221	AT1G11580,AT2G47550,AT2G45220
GO:0004091	carboxylesterase activity	0.631053	AT1G54030
GO:0005744	mitochondrial inner membrane presequence translocase complex	0.64	AT1G72750
GO:0046686	response to cadmium ion	0.64071	AT2G16720,AT1G06180,AT5G67300,AT4G23100,AT2G47190
GO:0004617	phosphoglycerate dehydrogenase activity	0.642857	AT4G34200
GO:0005488	binding	0.647831	AT2G22500,AT2G37970,AT2G39970,AT4G28390,AT5G13490,AT4G34200
GO:0010218	response to far red light	0.660192	AT4G16780
GO:0010114	response to red light	0.660425	AT1G30040
GO:0006537	glutamate biosynthetic process	0.666667	AT3G30775
GO:0006562	proline catabolic process	0.666667	AT3G30775
GO:0015116	sulfate transmembrane transporter activity	0.67402	AT1G23090,AT5G13550
GO:0009266	response to temperature stimulus	0.6875	AT2G41100
GO:0006970	response to osmotic stress	0.692543	AT5G20830
GO:0015031	protein transport	0.695865	AT4G18430,AT1G72750
GO:0010200	response to chitin	0.702188	AT2G38470,AT3G16530,AT2G31230
GO:0009738	abscisic acid mediated signaling	0.706892	AT1G18890
GO:0009753	response to jasmonic acid stimulus	0.707727	AT1G74020,AT2G34810,AT1G61120,AT4G11280,AT1G18570,AT2G16720,AT1G06180,AT5G67300,AT4G23100,AT5G27380,AT1G56650,AT4G35770,AT1G55020,AT3G16470,AT2G24850
GO:0009507	chloroplast	0.711185	AT4G25880,AT4G35630,AT1G15350,AT1G05340,AT5G01600,AT4G39980,AT1G17420,AT4G30210,AT2G42890,AT2G40300,AT4G22920,AT1G10410,AT2G13810,AT4G25700,AT2G04400,AT2G30550,AT1G18890,AT5G05730,AT1G10070,AT4G04610,AT4G23100,AT2G38360,AT5G27380,AT1G06570,AT4G39950,AT2G32140,AT4G35770,AT2G35980,AT1G61800,AT4G19880,AT4G33540,AT1G54710,AT4G17070,AT2G27510,AT4G15550,AT2G37250,AT5G17990,AT3G54640,AT5G13110
GO:0016165	lipoxygenase activity	0.714286	AT1G17420,AT1G55020
GO:0005643	nuclear pore	0.71875	AT4G17500
GO:0009742	brassinosteroid mediated signaling	0.722222	AT2G44080
GO:0004345	glucose-6-phosphate dehydrogenase activity	0.730769	AT5G13110
GO:0004022	alcohol dehydrogenase activity	0.730769	AT1G09500
GO:0004089	carbonate dehydratase activity	0.733333	AT1G23730
GO:0009867	jasmonic acid mediated signaling pathway	0.741401	AT3G23240
GO:0009416	response to light stimulus	0.747448	AT3G47340,AT1G77760,AT4G35770,AT1G37130
GO:0045548	phenylalanine ammonia-lyase activity	0.75	AT2G37040
GO:0009693	ethylene biosynthetic process	0.75	AT1G05010,AT4G11280,AT1G01480
GO:0006886	intracellular protein transport	0.756718	AT4G20110,AT1G76970
GO:0015079	potassium ion transmembrane transporter activity	0.757143	AT1G70300
GO:0005986	sucrose biosynthetic process	0.764706	AT5G20830
GO:0005515	protein binding	0.801679	AT4G03450,AT4G25230,AT2G42360,AT2G25440,AT4G11360,AT4G21790,AT4G11370,AT3G52430,AT3G13380,AT3G02520,AT1G14200,AT1G60610
GO:0031072	heat shock protein binding	0.805127	AT2G24860
GO:0042538	hyperosmotic salinity response	0.809831	AT2G37570
GO:0009751	response to salicylic acid stimulus	0.81621	AT2G29420,AT2G40000,AT1G18570,AT2G16720,AT1G06180,AT5G67300,AT2G47190
GO:0009570	chloroplast stroma	0.81864	AT4G08390,AT3G02520,AT2G37250
GO:0005992	trehalose biosynthetic process	0.846154	AT1G70290
GO:0004017	adenylate kinase activity	0.857143	AT2G37250
GO:0006096	glycolysis	0.857143	AT4G26270
GO:0015171	amino acid transmembrane transporter activity	0.890476	AT3G11900,AT5G63850
GO:0010252	auxin homeostasis	0.903846	AT4G27260
GO:0048364	root development	0.904762	AT4G16780,AT1G19850,AT1G55020,AT2G37250
GO:0003723	RNA binding	0.908613	AT4G25880,AT2G42890
GO:0015198	oligopeptide transporter activity	0.909091	AT4G24120
GO:0015385	sodium:hydrogen antiporter activity	0.909774	AT4G23700
GO:0042626	ATPase activity, coupled to transmembrane movement of substances	0.910714	AT3G47780,AT2G47000,AT3G47730,AT1G30400,AT2G47800
GO:0009706	chloroplast inner membrane	0.911765	AT3G44880
GO:0009684	indoleacetic acid biosynthetic process	0.916084	AT4G39950
GO:0004842	ubiquitin-protein ligase activity	0.920566	AT4G25230,AT2G42360,AT1G77000
GO:0009536	plastid	0.923105	AT4G04610,AT4G39030,AT2G34630,AT4G28390,AT5G13490
GO:0005783	endoplasmic reticulum	0.930305	AT4G37430,AT4G30210,AT4G37370,AT3G02875,AT3G26830,AT1G76490,AT2G40890,AT2G24180
GO:0005739	mitochondrion	0.951698	AT5G55070,AT2G21640,AT5G07440,AT2G44350,AT4G08390,AT3G47730,AT4G26910,AT3G30775,AT4G39030,AT1G06570,AT4G28390,AT5G13490,AT1G72750,AT5G08300,AT4G34200
GO:0007165	signal transduction	0.959463	AT2G25440,AT2G02710
GO:0048367	shoot development	0.96	AT2G37250
GO:0005777	peroxisome	0.962264	AT2G06050
GO:0005351	sugar:hydrogen symporter activity	0.963636	AT2G02860,AT3G47420
GO:0005794	Golgi apparatus	0.967349	AT1G30620,AT1G10290
GO:0005509	calcium ion binding	0.967879	AT4G20110,AT4G27280,AT2G33380,AT4G20780,AT2G43290,AT2G41100
GO:0005634	nucleus	0.96827	AT4G27410,AT3G23240,AT4G16780,AT2G38470,AT1G43160,AT1G19850,AT4G18950,AT5G65890,AT2G38340,AT2G31230,AT5G19890,AT4G18170,AT1G10170,AT5G47220,AT1G69490,AT4G22070,AT2G37250,AT2G27500
GO:0003676	nucleic acid binding	0.975763	AT5G04340
GO:0005507	copper ion binding	0.980608	AT5G21100,AT2G44790
GO:0045449	regulation of transcription	0.981928	AT2G40140,AT2G28510,AT2G29060
GO:0009505	plant-type cell wall	0.987543	AT1G11580,AT2G47550,AT2G45220
GO:0008270	zinc ion binding	0.999955	AT1G23730,AT4G25230,AT2G42360,AT5G04340,AT4G11360,AT4G11370,AT4G28370,AT3G28210,AT2G32250,AT1G14200,AT1G60610
GO:0010118	stomatal movement	1	AT2G47800
GO:0005737	cytoplasm	1	AT2G29420,AT2G29490,AT2G29480,AT2G29470,AT4G18950,AT2G37040,AT4G33150,AT2G40670,AT2G22470,AT2G29440,AT5G19890,AT3G21510,AT3G02520,AT1G09940,AT2G37250,AT4G39670,AT2G27500,AT2G29460
GO:0010236	plastoquinone biosynthetic process	1	AT1G06570
GO:0006914	autophagy	1	AT2G31260
GO:0006006	glucose metabolic process	1	AT5G13110
GO:0019430	removal of superoxide radicals	1	AT1G56650
GO:0006499	N-terminal protein myristoylation	1	AT4G20110,AT5G64120,AT1G10410,AT2G36630,AT1G18890,AT2G37970,AT2G02310,AT5G27380,AT4G23700,AT1G08800
GO:0015491	cation:cation antiporter activity	1	AT2G47600
GO:0008517	folic acid transporter activity	1	AT2G47800
GO:0009697	salicylic acid biosynthetic process	1	AT4G39030,AT1G10170
GO:0008150	biological_process	1	AT1G15350,AT1G05340,AT4G18890,AT4G00700,AT2G20320,AT4G26060,AT2G36220,AT1G79270,AT4G18010,AT2G34070,AT2G01610,AT4G27280,AT2G01670,AT2G23110,AT2G22560,AT1G03290,AT3G16330,AT2G27310,AT1G79450,AT2G44970,AT1G27100,AT2G44130,AT4G31290,AT2G42760,AT5G34940,AT2G28320,AT2G14290,AT1G67360,AT2G40110,AT2G30010,AT5G01210,AT2G38360,AT4G01960,AT2G43290,AT1G23710,AT4G16500,AT3G16860,AT4G15610,AT1G26930,AT4G21850…
GO:0009703	nitrate reductase (NADH) activity	1	AT1G37130
GO:0006571	tyrosine biosynthetic process	1	AT5G34930
GO:0008565	protein transporter activity	1	AT1G76970
GO:0004357	glutamate-cysteine ligase activity	1	AT4G23100
GO:0048767	root hair elongation	1	AT2G47000
GO:0004805	trehalose-phosphatase activity	1	AT1G70290
GO:0009972	cytidine deamination	1	AT2G19570
GO:0006810	transport	1	AT2G22500,AT1G23090,AT2G39970,AT4G28390,AT5G13490,AT5G13550,AT4G36640
GO:0047631	ADP-ribose diphosphatase activity	1	AT4G12720
GO:0033014	tetrapyrrole biosynthetic process	1	AT1G09940
GO:0016682	oxidoreductase activity, acting on diphenols and related substances as donors, oxygen as acceptor	1	AT1G17020
GO:0004657	proline dehydrogenase activity	1	AT3G30775
GO:0003863	3-methyl-2-oxobutanoate dehydrogenase (2-methylpropanoyl-transferring) activity	1	AT1G55510
GO:0010310	regulation of hydrogen peroxide metabolic process	1	AT3G52430
GO:0010189	vitamin E biosynthetic process	1	AT1G06570
GO:0016629	12-oxophytodienoate reductase activity	1	AT2G06050
GO:0009407	toxin catabolic process	1	AT2G29420,AT2G29490,AT2G29480,AT2G29470,AT2G29440,AT2G29460
GO:0006855	multidrug transport	1	AT2G47800
GO:0006950	response to stress	1	AT1G09740
GO:0006099	tricarboxylic acid cycle	1	AT2G44350
GO:0008283	cell proliferation	1	AT4G16780
GO:0005829	cytosol	1	AT1G23730,AT4G12720,AT4G33150,AT2G19570,AT1G67980,AT5G27380,AT1G06570,AT1G77760,AT5G12030,AT5G02490
GO:0046910	pectinesterase inhibitor activity	1	AT2G01610
GO:0004776	succinate-CoA ligase (GDP-forming) activity	1	AT5G08300
GO:0016998	cell wall catabolic process	1	AT2G33580,AT2G43570,AT2G43590
GO:0005802	trans-Golgi network	1	AT4G20110
GO:0006809	nitric oxide biosynthetic process	1	AT1G77760,AT1G37130
GO:0016020	membrane	1	AT1G70300,AT2G02860,AT2G47000,AT1G79450,AT1G23090,AT4G24000,AT4G39030,AT1G76490,AT3G11900,AT4G28390,AT4G21680,AT4G32140,AT1G61800,AT5G13550,AT5G63850,AT3G47960
GO:0003872	6-phosphofructokinase activity	1	AT4G26270
GO:0015297	antiporter activity	1	AT4G39030,AT1G61800
GO:0010266	response to vitamin B1	1	AT2G14610
GO:0009805	coumarin biosynthetic process	1	AT2G40890
GO:0005778	peroxisomal membrane	1	AT2G39970
GO:0005792	microsome	1	AT3G26830,AT2G40890
GO:0019465	aspartate transamidation	1	AT2G13810
GO:0010051	xylem and phloem pattern formation	1	AT1G19850
GO:0008515	sucrose transmembrane transporter activity	1	AT2G02860
GO:0045309	protein phosphorylated amino acid binding	1	AT3G02520
GO:0005575	cellular_component	1	AT4G37990,AT3G46230,AT2G46650,AT2G23150,AT4G18890,AT4G00700,AT2G20320,AT4G26060,AT2G20900,AT2G38870,AT2G36220,AT4G16690,AT1G79270,AT1G61120,AT1G17020,AT1G65610,AT4G01870,AT4G23710,AT4G11280,AT2G40000,AT1G01720,AT5G22300,AT1G05680,AT2G33380,AT2G23110,AT1G05000,AT2G43820,AT2G22560,AT1G03290,AT2G31870,AT3G16330,AT2G27310,AT2G44970,AT2G32150,AT2G44130,AT4G31290,AT2G42760,AT2G37570,AT4G27260,AT4G13250…
GO:0010315	auxin efflux	1	AT2G47000
GO:0030397	membrane disassembly	1	AT1G55020
GO:0009672	auxin:hydrogen symporter activity	1	AT2G17500
GO:0004445	inositol-polyphosphate 5-phosphatase activity	1	AT4G18010
GO:0005618	cell wall	1	AT5G64120,AT1G32170,AT4G25810,AT2G14620
GO:0030418	nicotianamine biosynthetic process	1	AT1G09240
GO:0009700	indole phytoalexin biosynthetic process	1	AT3G26830,AT4G23100
GO:0004416	hydroxyacylglutathione hydrolase activity	1	AT1G53580
GO:0042411	beta-carotene hydroxylase activity	1	AT4G25700
GO:0015399	primary active transmembrane transporter activity	1	AT5G63850
GO:0005471	ATP:ADP antiporter activity	1	AT4G28390,AT5G13490
GO:0032441	pheophorbide a oxygenase activity	1	AT3G44880
GO:0042128	nitrate assimilation	1	AT1G77760,AT1G37130
GO:0005635	nuclear envelope	1	AT3G02520
GO:0015865	purine nucleotide transport	1	AT4G28390,AT5G13490
GO:0006530	asparagine catabolic process	1	AT2G13810
GO:0016117	carotenoid biosynthetic process	1	AT1G06570
GO:0010120	camalexin biosynthetic process	1	AT2G38470,AT2G30770,AT3G26830,AT4G39950
GO:0008631	induction of apoptosis by oxidative stress	1	AT4G11280
GO:0019761	glucosinolate biosynthetic process	1	AT4G23100
GO:0008219	cell death	1	AT3G44880,AT2G39200,AT1G61560
GO:0004031	aldehyde oxidase activity	1	AT5G20960
GO:0046872	metal ion binding	1	AT1G17420,AT4G35060,AT1G09560,AT4G14630,AT2G36950
GO:0004556	alpha-amylase activity	1	AT4G25000
GO:0009116	nucleoside metabolic process	1	AT4G24350
GO:0004363	glutathione synthase activity	1	AT5G27380
GO:0006118	electron transport	1	AT2G46650,AT3G48890,AT1G62570,AT2G44790,AT4G10040,AT2G27510
GO:0009926	auxin polar transport	1	AT2G47000,AT2G17500
GO:0008474	palmitoyl-(protein) hydrolase activity	1	AT4G17470
GO:0046685	response to arsenic	1	AT5G52640,AT4G13180,AT4G33540
GO:0009605	response to external stimulus	1	AT4G11280
GO:0015144	carbohydrate transmembrane transporter activity	1	AT2G02860
GO:0005622	intracellular	1	AT5G54840,AT2G44080,AT5G26940,AT5G04340,AT4G18430,AT4G36640
GO:0009543	chloroplast thylakoid lumen	1	AT1G79450
GO:0000257	nitrilase activity	1	AT5G22300
GO:0004108	citrate (SI)-synthase activity	1	AT2G44350
GO:0004753	saccharopine dehydrogenase activity	1	AT4G33150
GO:0008146	sulfotransferase activity	1	AT2G03760
GO:0005524	ATP binding	1	AT5G52640,AT2G31880,AT4G16660,AT2G32800,AT5G02490
GO:0007169	transmembrane receptor protein tyrosine kinase signaling pathway	1	AT2G31880
GO:0050373	UDP-arabinose 4-epimerase activity	1	AT1G30620
GO:0009815	1-aminocyclopropane-1-carboxylate oxidase activity	1	AT1G05010
GO:0050302	indole-3-acetaldehyde oxidase activity	1	AT5G20960
GO:0010102	lateral root morphogenesis	1	AT2G04160
GO:0004665	prephenate dehydrogenase (NADP+) activity	1	AT5G34930
GO:0009850	auxin metabolic process	1	AT3G02875,AT5G54140
GO:0016844	strictosidine synthase activity	1	AT1G74020
GO:0009535	chloroplast thylakoid membrane	1	AT3G48890
GO:0031224	intrinsic to membrane	1	AT2G32140
GO:0015103	inorganic anion transmembrane transporter activity	1	AT2G23150
GO:0003878	ATP citrate synthase activity	1	AT2G44350
GO:0046873	metal ion transmembrane transporter activity	1	AT2G23150
GO:0048507	meristem development	1	AT1G19850
GO:0047130	saccharopine dehydrogenase (NADP+, L-lysine-forming) activity	1	AT4G33150
GO:0008272	sulfate transport	1	AT1G23090,AT5G13550
GO:0006865	amino acid transport	1	AT3G11900,AT5G63850
GO:0003840	gamma-glutamyltransferase activity	1	AT4G39640
GO:0007010	cytoskeleton organization and biogenesis	1	AT2G41740
GO:0006779	porphyrin biosynthetic process	1	AT1G09940
GO:0005795	Golgi stack	1	AT1G76970
GO:0015152	glucose-6-phosphate transmembrane transporter activity	1	AT1G61800
GO:0004352	glutamate dehydrogenase activity	1	AT5G07440
GO:0051536	iron-sulfur cluster binding	1	AT3G44880
GO:0015770	sucrose transport	1	AT2G02860
GO:0009942	longitudinal axis specification	1	AT1G19850
GO:0015712	hexose phosphate transport	1	AT1G61800
GO:0000103	sulfate assimilation	1	AT4G04610
GO:0016759	cellulose synthase activity	1	AT4G24000
GO:0016597	amino acid binding	1	AT5G65890,AT4G34200
GO:0009051	pentose-phosphate shunt, oxidative branch	1	AT5G13110
GO:0019201	nucleotide kinase activity	1	AT2G37250
GO:0004871	signal transducer activity	1	AT2G02710
GO:0016702	oxidoreductase activity, acting on single donors with incorporation of molecular oxygen, incorporation of two atoms of oxygen	1	AT1G17420
GO:0009744	response to sucrose stimulus	1	AT3G47340,AT4G35770
GO:0008940	nitrate reductase activity	1	AT1G77760,AT1G37130
GO:0019554	glutamate catabolic process to oxaloacetate	1	AT2G13810
GO:0048544	recognition or rejection of self pollen	1	AT1G61360,AT2G19130,AT1G61370,AT4G21390,AT1G61610
GO:0006073	glucan metabolic process	1	AT1G32170,AT4G25810,AT2G14620
GO:0016119	carotene metabolic process	1	AT4G25700
GO:0003674	molecular_function	1	AT1G15350,AT1G05340,AT2G21640,AT4G00700,AT2G20320,AT4G26060,AT2G36220,AT1G79270,AT4G01870,AT4G22920,AT2G44080,AT2G40000,AT2G23110,AT2G22560,AT1G03290,AT3G16330,AT2G27310,AT2G37130,AT1G27100,AT2G44130,AT4G31290,AT2G42760,AT2G37570,AT2G45210,AT2G28320,AT2G14290,AT1G67360,AT2G40110,AT3G28930,AT4G20260,AT2G22470,AT2G38360,AT2G24100,AT4G01960,AT1G23710,AT4G15610,AT1G26930,AT2G46140,AT4G35770,AT2G35980…
GO:0006511	ubiquitin-dependent protein catabolic process	1	AT1G77000
GO:0015969	guanosine tetraphosphate metabolic process	1	AT1G54130
GO:0019477	L-lysine catabolic process	1	AT4G33150
GO:0046283	anthocyanin metabolic process	1	AT1G56650
GO:0006879	cellular iron ion homeostasis	1	AT5G01600,AT2G40300
GO:0009423	chorismate biosynthetic process	1	AT4G39980
GO:0004034	aldose 1-epimerase activity	1	AT4G25900
GO:0016756	glutathione gamma-glutamylcysteinyltransferase activity	1	AT4G39640
GO:0005740	mitochondrial envelope	1	AT5G13490
GO:0003958	NADPH-hemoprotein reductase activity	1	AT4G30210
GO:0016616	oxidoreductase activity, acting on the CH-OH group of donors, NAD or NADP as acceptor	1	AT4G34200
GO:0019421	sulfate reduction, APS pathway	1	AT4G04610
GO:0046786	viral replication complex formation and maintenance	1	AT4G21790
GO:0005525	GTP binding	1	AT5G54840,AT1G33960,AT4G18430
GO:0003755	peptidyl-prolyl cis-trans isomerase activity	1	AT4G17070
GO:0005384	manganese ion transmembrane transporter activity	1	AT2G23150
GO:0000249	C-22 sterol desaturase activity	1	AT2G34500
GO:0012505	endomembrane system	1	AT1G74020,AT4G12470,AT4G04500,AT4G17470,AT1G11050,AT3G13790,AT2G25440,AT5G36220,AT2G34810,AT2G34070,AT1G61360,AT2G33580,AT5G25930,AT2G01610,AT5G21100,AT2G36630,AT1G32170,AT4G25810,AT2G37130,AT3G57260,AT3G16530,AT2G38860,AT2G34500,AT2G43620,AT4G24350,AT5G34940,AT4G20860,AT2G27690,AT1G67360,AT5G54140,AT3G54420,AT5G44380,AT1G30700,AT4G16500,AT5G24160,AT1G61810,AT4G37310,AT2G19190,AT5G24150,AT4G28370…
GO:0016311	dephosphorylation	1	AT2G01890
GO:0019243	methylglyoxal catabolic process to D-lactate	1	AT1G53580
GO:0010279	indole-3-acetic acid amido synthetase	1	AT4G27260
GO:0045487	gibberellin catabolic process	1	AT1G30040
GO:0005774	vacuolar membrane	1	AT2G23150,AT2G47600,AT1G30400,AT4G21790,AT2G47800
GO:0008415	acyltransferase activity	1	AT5G55070,AT4G26910
GO:0006012	galactose metabolic process	1	AT4G25900

## Sheet: Mahalingum GO terms Induced
Term	Desc	PCI PVAL	Genes
GO:0006412	translation	6.3125e-21	AT5G07090,AT4G39200,AT1G07320,AT3G09630,AT5G40950,AT5G06360,AT4G16720,AT3G53890,AT3G25520,AT1G66580,AT5G03850,AT2G19740,AT5G10360,AT3G55280,AT1G22780,AT5G02450
GO:0006508	proteolysis	3.71791e-14	AT3G14067,AT1G02300,AT5G04710,AT3G51330,AT4G25110,AT4G16190,AT2G24200,AT1G32940,AT2G26140,AT4G38220
GO:0016301	kinase activity	7.53327e-14	AT5G58350,AT4G02410,AT4G00330,AT4G23130,AT1G31910,AT5G24430,AT5G58140,AT5G24080,AT3G45860,AT3G45640,AT3G47570,AT2G23450,AT4G08850,AT4G11890,AT1G10940
GO:0051287	NAD binding	8.03829e-14	AT4G12720,AT1G79440,AT5G51970,AT5G28840,AT4G34200
GO:0009793	embryonic development ending in seed dormancy	4.11114e-12	AT4G13940,AT3G57870,AT3G19580,AT5G53860,AT1G34430,AT5G10360,AT1G56200,AT1G20200,AT1G07890,AT3G19980
GO:0004364	glutathione transferase activity	3.01699e-11	AT1G69930,AT1G78380,AT2G47730,AT2G29460,AT2G29470
GO:0006464	protein modification process	1.18198e-09	AT4G05050,AT2G35360,AT4G02890,AT4G24990
GO:0015979	photosynthesis	3.86374e-09	AT3G27690,AT1G15820,AT3G16140,AT5G01530
GO:0006468	protein amino acid phosphorylation	1.15035e-08	AT4G29380,AT5G58350,AT4G02410,AT4G00330,AT4G23130,AT5G24080,AT3G47570,AT2G23450,AT4G08850,AT4G11890
GO:0006800	oxygen and reactive oxygen species metabolic process	1.9123e-08	AT1G79440,AT4G34460,AT5G47910
GO:0003743	translation initiation factor activity	4.38619e-08	AT1G10840,AT2G23350,AT1G77840,AT3G13920
GO:0005975	carbohydrate metabolic process	6.52737e-08	AT4G16260,AT1G23190,AT3G60130,AT2G14620,AT4G30280
GO:0016168	chlorophyll binding	6.59586e-08	AT3G27690,AT1G15820,AT5G01530
GO:0007275	multicellular organismal development	7.90634e-08	AT3G15500,AT5G39610,AT5G17520,AT5G63790
GO:0006629	lipid metabolic process	1.03492e-07	AT5G03610,AT1G28600,AT3G51730,AT3G52430
GO:0006457	protein folding	1.20802e-07	AT5G02500,AT3G25220,AT3G09440,AT5G13120,AT1G08450
GO:0008380	RNA splicing	4.46204e-07	AT3G49430,AT3G13570,AT3G53500
GO:0004066	asparagine synthase (glutamine-hydrolyzing) activity	4.59256e-07	AT5G65010,AT3G47340
GO:0009698	phenylpropanoid metabolic process	2.09497e-06	AT4G30210,AT3G21240
GO:0009627	systemic acquired resistance	4.52213e-06	AT3G57260,AT3G52430,AT2G14610,AT1G75040
GO:0009695	jasmonic acid biosynthetic process	9.63529e-06	AT1G17420,AT4G05160
GO:0010154	fruit development	1.11924e-05	AT3G22200,AT4G34460
GO:0009225	nucleotide-sugar metabolic process	1.1865e-05	AT5G28840,AT3G23820
GO:0008266	poly(U) binding	1.21845e-05	AT2G37220,AT1G07320
GO:0006520	amino acid metabolic process	1.52158e-05	AT1G75330,AT4G38220
GO:0016688	L-ascorbate peroxidase activity	2.24571e-05	AT4G08390,AT1G07890
GO:0030163	protein catabolic process	2.28707e-05	AT4G24820,AT2G26140
GO:0000398	nuclear mRNA splicing, via spliceosome	2.38767e-05	AT3G13570,AT3G53500
GO:0042803	protein homodimerization activity	3.10075e-05	AT4G12720,AT5G39610
GO:0009790	embryonic development	3.10249e-05	AT4G02380,AT4G36800
GO:0003779	actin binding	5.3477e-05	AT1G20450,AT4G29350
GO:0004601	peroxidase activity	5.37685e-05	AT1G71695,AT5G64120
GO:0030599	pectinesterase activity	0.000171683	AT1G11580,AT2G45220
GO:0004091	carboxylesterase activity	0.00019846	AT5G03610,AT1G28600
GO:0004338	glucan 1,3-beta-glucosidase activity	0.000260756	AT3G57260
GO:0008470	isovaleryl-CoA dehydrogenase activity	0.000266525	AT3G45300
GO:0016002	sulfite reductase activity	0.000266809	AT5G04590
GO:0042389	omega-3 fatty acid desaturase activity	0.00026688	AT2G29980
GO:0004015	adenosylmethionine-8-amino-7-oxononanoate transaminase activity	0.000272851	AT3G22200
GO:0003867	4-aminobutyrate transaminase activity	0.000272851	AT3G22200
GO:0003881	CDP-diacylglycerol-inositol 3-phosphatidyltransferase activity	0.000273299	AT1G68000
GO:0010298	dihydrocamalexic acid decarboxylase activity	0.000275634	AT3G26830
GO:0004791	thioredoxin-disulfide reductase activity	0.000301296	AT2G41680
GO:0003735	structural constituent of ribosome	0.000345639	AT5G07090,AT4G39200,AT1G07320,AT3G09630,AT5G40950,AT5G06360,AT4G16720,AT3G53890,AT3G25520,AT1G66580,AT5G03850,AT2G19740,AT5G10360,AT3G55280,AT1G22780,AT5G02450
GO:0006535	cysteine biosynthetic process from serine	0.000444247	AT5G56760
GO:0001510	RNA methylation	0.000444247	AT4G25630
GO:0006529	asparagine biosynthetic process	0.000445038	AT5G65010
GO:0046482	para-aminobenzoic acid metabolic process	0.000447127	AT2G43820
GO:0048598	embryonic morphogenesis	0.000497265	AT3G46740
GO:0008409	5'-3' exonuclease activity	0.000529801	AT5G42540
GO:0015036	disulfide oxidoreductase activity	0.000533476	AT4G28220
GO:0010297	heteroglycan binding	0.000534188	AT2G26400
GO:0034387	4-aminobutyrate:pyruvate transaminase activity	0.000545703	AT3G22200
GO:0004839	ubiquitin activating enzyme activity	0.00055371	AT2G30110
GO:0015559	multidrug efflux pump activity	0.000571919	AT4G39030
GO:0004722	protein serine/threonine phosphatase activity	0.0006385	AT1G64040,AT3G19980
GO:0015631	tubulin binding	0.000658906	AT3G43610
GO:0009063	amino acid catabolic process	0.000668747	AT3G47340
GO:0006552	leucine catabolic process	0.000890869	AT3G45300
GO:0006556	S-adenosylmethionine biosynthetic process	0.000891862	AT1G02500
GO:0010374	stomatal complex development	0.000994283	AT3G45640
GO:0006636	unsaturated fatty acid biosynthetic process	0.00107365	AT2G29980
GO:0004478	methionine adenosyltransferase activity	0.00109409	AT1G02500
GO:0006346	methylation-dependent chromatin silencing	0.00130378	AT4G13940
GO:0016925	protein sumoylation	0.0013248	AT3G57870
GO:0003954	NADH dehydrogenase activity	0.00133262	AT4G28220
GO:0006730	one-carbon compound metabolic process	0.0015653	AT4G13940
GO:0004534	5'-3' exoribonuclease activity	0.00158856	AT5G42540
GO:0005544	calcium-dependent phospholipid binding	0.00160557	AT5G61900
GO:0010015	root morphogenesis	0.00173827	AT2G23460
GO:0009561	megagametogenesis	0.00223602	AT4G34200
GO:0008559	xenobiotic-transporting ATPase activity	0.00225702	AT1G30400
GO:0019253	reductive pentose-phosphate cycle	0.00232313	AT3G62410
GO:0008081	phosphoric diester hydrolase activity	0.0023968	AT2G18280
GO:0004332	fructose-bisphosphate aldolase activity	0.00248002	AT4G38970
GO:0009887	organ morphogenesis	0.00272885	AT4G34460
GO:0009073	aromatic amino acid family biosynthetic process	0.0028844	AT2G35500
GO:0009813	flavonoid biosynthetic process	0.00289082	AT3G48990
GO:0009860	pollen tube growth	0.00316302	AT3G22200
GO:0009646	response to absence of light	0.00328947	AT3G47340,AT2G41100
GO:0016779	nucleotidyltransferase activity	0.00381575	AT2G35020
GO:0016298	lipase activity	0.00399042	AT3G52430
GO:0004707	MAP kinase activity	0.0040937	AT3G45640
GO:0010150	leaf senescence	0.0041769	AT3G52430
GO:0046982	protein heterodimerization activity	0.00502513	AT5G39610
GO:0016071	mRNA metabolic process	0.00575603	AT2G23350
GO:0000162	tryptophan biosynthetic process	0.00662542	AT4G31500
GO:0004723	calcium-dependent protein serine/threonine phosphatase activity	0.00696592	AT5G24430
GO:0004371	glycerone kinase activity	0.00756409	AT1G48430
GO:0007568	aging	0.00815016	AT2G29350
GO:0006350	transcription	0.00818765	AT3G52090
GO:0006470	protein amino acid dephosphorylation	0.00832421	AT1G64040
GO:0016567	protein ubiquitination	0.0094195	AT2G30110
GO:0009908	flower development	0.00985464	AT1G79000
GO:0004672	protein kinase activity	0.00987569	AT4G29380,AT5G58350,AT3G45640
GO:0020037	heme binding	0.0106283	AT3G48890
GO:0006396	RNA processing	0.010793	AT5G41770
GO:0005515	protein binding	0.0111507	AT5G21090,AT1G67800,AT1G49750,AT3G48360,AT4G05050,AT4G08460,AT3G62290,AT5G10650,AT3G52430,AT5G01160,AT1G32340,AT5G55190,AT3G46620,AT2G18960,AT1G69390,AT4G02890,AT5G07220,AT3G62410,AT2G41430,AT4G29350,AT3G15980,AT1G63840,AT4G34460,AT3G45620,AT3G45640,AT4G14400,AT1G10340,AT2G15580,AT2G24790,AT5G19330,AT4G32600,AT3G19980
GO:0019825	oxygen binding	0.0115184	AT3G26830,AT5G63450,AT3G03470,AT4G31500,AT2G34500,AT2G24180
GO:0004674	protein serine/threonine kinase activity	0.0118585	AT5G58140,AT3G47570,AT3G19980
GO:0005247	voltage-gated chloride channel activity	0.0119658	AT5G40890,AT5G49890,AT3G27170
GO:0015692	lead ion transport	0.0126984	AT1G15520
GO:0009826	unidimensional cell growth	0.0132029	AT3G51160
GO:0043617	cellular response to sucrose starvation	0.0147059	AT3G47340
GO:0006367	transcription initiation from RNA polymerase II promoter	0.017094	AT4G24440,AT1G03280
GO:0006890	retrograde vesicle-mediated transport, Golgi to ER	0.0172414	AT2G21600
GO:0003824	catalytic activity	0.0176545	AT2G34770,AT4G22580,AT4G34700,AT5G51970,AT4G38970,AT5G28840,AT4G34200,AT2G16280,AT2G29630,AT2G20260,AT3G23820,AT3G57630,AT5G49570
GO:0045730	respiratory burst	0.0181411	AT5G64120
GO:0006606	protein import into nucleus	0.0182232	AT5G55190
GO:0045036	protein targeting to chloroplast	0.018648	AT3G46740
GO:0004806	triacylglycerol lipase activity	0.019485	AT3G52430
GO:0009871	jasmonic acid and ethylene-dependent systemic resistance, ethylene mediated signaling pathway	0.0210521	AT5G03280
GO:0006839	mitochondrial transport	0.0219216	AT5G48970,AT4G39460
GO:0042744	hydrogen peroxide catabolic process	0.0235849	AT2G41680
GO:0016798	hydrolase activity, acting on glycosyl bonds	0.0249852	AT5G57560,AT2G14620,AT4G30280
GO:0046777	protein amino acid autophosphorylation	0.0302068	AT5G58140
GO:0042631	cellular response to water deprivation	0.0380491	AT1G78380,AT4G02380
GO:0015145	monosaccharide transmembrane transporter activity	0.0392157	AT3G18830
GO:0009862	systemic acquired resistance, salicylic acid mediated signaling pathway	0.0400035	AT4G20380,AT3G52430
GO:0008194	UDP-glycosyltransferase activity	0.0406594	AT1G05680,AT2G31790,AT2G43820,AT3G46660
GO:0009641	shade avoidance	0.0423729	AT4G31500
GO:0007186	G-protein coupled receptor protein signaling pathway	0.044586	AT2G23460
GO:0016051	carbohydrate biosynthetic process	0.0448756	AT5G15050
GO:0030515	snoRNA binding	0.044879	AT4G25630
GO:0008393	fatty acid (omega-1)-hydroxylase activity	0.0451681	AT2G34770
GO:0006422	aspartyl-tRNA aminoacylation	0.0454545	AT4G31180
GO:0015833	peptide transport	0.0454545	AT2G02040
GO:0009055	electron carrier activity	0.0458437	AT4G20830,AT1G26390,AT1G30700,AT2G34810
GO:0006510	ATP-dependent proteolysis	0.0478366	AT5G51070
GO:0010161	red light signaling pathway	0.0480688	AT2G24790
GO:0009867	jasmonic acid mediated signaling pathway	0.0514001	AT3G15500,AT4G34460
GO:0010017	red or far red light signaling pathway	0.0515464	AT2G37970
GO:0007264	small GTPase mediated signal transduction	0.0520861	AT1G06400,AT5G45130
GO:0005672	transcription factor TFIIA complex	0.0555556	AT4G24440
GO:0005673	transcription factor TFIIE complex	0.0555556	AT1G03280
GO:0009870	defense response signaling pathway, resistance gene-dependent	0.0564972	AT4G12720
GO:0008154	actin polymerization or depolymerization	0.0571429	AT4G29350
GO:0003712	transcription cofactor activity	0.0610957	AT1G79000
GO:0000302	response to reactive oxygen species	0.0657992	AT4G02380,AT1G07890
GO:0008810	cellulase activity	0.0710191	AT3G57260
GO:0001676	long-chain fatty acid metabolic process	0.0769231	AT3G05970,AT4G16760
GO:0005253	anion channel activity	0.0833333	AT5G40890,AT5G49890,AT3G27170
GO:0048046	apoplast	0.084598	AT1G32940,AT2G14620,AT4G30280
GO:0048037	cofactor binding	0.084967	AT4G34200
GO:0000166	nucleotide binding	0.0850708	AT3G10420,AT4G16950,AT3G05090,AT5G66240,AT4G34460,AT1G66090,AT3G45620
GO:0001666	response to hypoxia	0.0857012	AT4G20380,AT3G52430
GO:0008430	selenium binding	0.0858908	AT1G05720
GO:0006421	asparaginyl-tRNA aminoacylation	0.0869565	AT4G17300
GO:0048830	adventitious root development	0.0869565	AT4G31500
GO:0006426	glycyl-tRNA aminoacylation	0.0869565	AT1G29880
GO:0016709	oxidoreductase activity, acting on paired donors, with incorporation or reduction of molecular oxygen, NADH or NADPH as one donor, and incorporation of one atom of oxygen	0.0892413	AT4G31500
GO:0008265	Mo-molybdopterin cofactor sulfurase activity	0.0898643	AT5G44720
GO:0035251	UDP-glucosyltransferase activity	0.0902446	AT2G43820
GO:0009970	cellular response to sulfate starvation	0.0945946	AT1G55920
GO:0008320	protein transmembrane transporter activity	0.0955759	AT1G57620
GO:0009348	ornithine carbamoyltransferase complex	0.1	AT1G75330
GO:0010006	toc complex	0.1	AT3G46740
GO:0030234	enzyme regulator activity	0.102688	AT4G04640
GO:0008152	metabolic process	0.103039	AT1G55450,AT5G51970,AT1G05680,AT3G57650,AT3G48990,AT2G31790,AT2G35020,AT4G35830,AT4G22530,AT1G68620,AT3G46660,AT3G45770
GO:0006813	potassium ion transport	0.103245	AT4G30360
GO:0004816	asparagine-tRNA ligase activity	0.105263	AT4G17300
GO:0004815	aspartate-tRNA ligase activity	0.105263	AT4G31180
GO:0004820	glycine-tRNA ligase activity	0.105263	AT1G29880
GO:0009833	plant-type primary cell wall biogenesis	0.105263	AT5G05170
GO:0009679	hexose:hydrogen symporter activity	0.109091	AT5G26340
GO:0048573	photoperiodism, flowering	0.127451	AT1G79000
GO:0040007	growth	0.129387	AT1G17420
GO:0004553	hydrolase activity, hydrolyzing O-glycosyl compounds	0.132196	AT3G57520,AT3G57260,AT4G16260,AT3G60130
GO:0017110	nucleoside-diphosphatase activity	0.142857	AT4G12720
GO:0000164	protein phosphatase type 1 complex	0.142857	AT1G64040
GO:0031348	negative regulation of defense response	0.144737	AT5G03280,AT4G39030,AT3G52430
GO:0009902	chloroplast relocation	0.146154	AT5G58140
GO:0015804	neutral amino acid transport	0.153627	AT1G58360
GO:0045010	actin nucleation	0.157895	AT2G38440
GO:0008553	hydrogen-exporting ATPase activity, phosphorylative mechanism	0.157895	AT2G18960
GO:0016986	transcription initiation factor activity	0.158344	AT1G03280
GO:0010114	response to red light	0.161538	AT4G31500
GO:0016046	detection of fungus	0.161765	AT5G13320
GO:0016762	xyloglucan:xyloglucosyl transferase activity	0.174021	AT5G57560
GO:0003723	RNA binding	0.180191	AT2G37220,AT2G23350,AT3G49430,AT1G22910,AT3G13570,AT5G08420,AT3G55280,AT3G19130
GO:0016591	DNA-directed RNA polymerase II, holoenzyme	0.181818	AT3G52090
GO:0010318	pyrophosphate-dependent phosphofructokinase complex, beta-subunit complex	0.181818	AT1G12000
GO:0009865	pollen tube adhesion	0.181818	AT3G22200
GO:0009783	photosystem II antenna complex	0.181818	AT1G15820
GO:0009544	chloroplast ATP synthase complex	0.181818	AT4G04640
GO:0006979	response to oxidative stress	0.195061	AT1G71695,AT4G12720,AT5G03280,AT3G22200,AT4G20830,AT1G78380,AT1G13340,AT1G19020,AT4G08390,AT3G45640,AT4G02380
GO:0016337	cell-cell adhesion	0.2	AT2G38440
GO:0015629	actin cytoskeleton	0.2	AT1G20450,AT4G29350
GO:0008446	GDP-mannose 4,6-dehydratase activity	0.2	AT3G51160
GO:0005764	lysosome	0.2	AT3G51730
GO:0009816	defense response to bacterium, incompatible interaction	0.201076	AT3G52430,AT5G13320,AT4G14400
GO:0009538	photosystem I reaction center	0.205882	AT3G16140,AT2G20260
GO:0005506	iron ion binding	0.207857	AT1G17420,AT5G05600
GO:0005488	binding	0.211877	AT5G51970,AT5G48970,AT4G10840,AT4G39460,AT4G34200,AT5G41770,AT1G02150,AT2G37970,AT1G02910,AT5G13490,AT3G02840
GO:0005576	extracellular region	0.212068	AT2G43520,AT2G14610
GO:0004568	chitinase activity	0.219488	AT2G43570
GO:0010270	photosystem II oxygen evolving complex assembly	0.222222	AT1G02910
GO:0003702	RNA polymerase II transcription factor activity	0.227731	AT4G24440
GO:0000038	very-long-chain fatty acid metabolic process	0.235294	AT2G34770,AT2G16280
GO:0009644	response to high light intensity	0.235294	AT2G41430
GO:0005886	plasma membrane	0.243881	AT4G20830,AT2G38290,AT1G58360,AT5G61900,AT2G18960,AT1G15520,AT5G05170,AT3G18830,AT1G71880,AT4G13510,AT4G08850
GO:0010181	FMN binding	0.244076	AT5G58140
GO:0016758	transferase activity, transferring hexosyl groups	0.248717	AT1G05680,AT2G43820
GO:0006661	phosphatidylinositol biosynthetic process	0.25	AT1G68000
GO:0042351	'de novo' GDP-L-fucose biosynthetic process	0.25	AT3G51160
GO:0040014	regulation of multicellular organism growth	0.25	AT5G58270
GO:0004551	nucleotide diphosphatase activity	0.25	AT5G18280
GO:0015450	P-P-bond-hydrolysis-driven protein transmembrane transporter activity	0.255063	AT3G46740,AT2G18710
GO:0009408	response to heat	0.256368	AT5G03280,AT5G57560,AT1G79440,AT5G02500,AT5G53170,AT3G09440,AT5G47910,AT1G07890
GO:0009863	salicylic acid mediated signaling pathway	0.258777	AT5G13320
GO:0009873	ethylene mediated signaling pathway	0.260613	AT5G03280
GO:0009409	response to cold	0.265468	AT2G37220,AT1G55920,AT5G57560,AT2G36530,AT5G02500,AT3G57260,AT5G04590,AT2G47730,AT1G20450,AT2G16280,AT4G35300,AT3G45640,AT5G20720,AT4G02380
GO:0008375	acetylglucosaminyltransferase activity	0.281628	AT5G15050
GO:0009629	response to gravity	0.285714	AT5G17520
GO:0009626	plant-type hypersensitive response	0.286548	AT4G12720,AT5G61900,AT4G20380
GO:0008541	proteasome regulatory particle, lid subcomplex	0.289474	AT4G24820,AT1G20200
GO:0030076	light-harvesting complex	0.289474	AT3G27690,AT5G01530
GO:0009270	response to humidity	0.294872	AT5G61900
GO:0006915	apoptosis	0.297297	AT5G07220
GO:0008643	carbohydrate transport	0.30348	AT1G11260,AT3G18830
GO:0030246	carbohydrate binding	0.305035	AT3G16530,AT5G03350
GO:0031209	SCAR complex	0.307692	AT2G38440
GO:0009612	response to mechanical stimulus	0.307692	AT5G57560,AT2G41100
GO:0010196	nonphotochemical quenching	0.31244	AT1G15820
GO:0000159	protein phosphatase type 2A complex	0.318182	AT3G19980
GO:0006635	fatty acid beta-oxidation	0.319328	AT2G35690,AT4G16760
GO:0005215	transporter activity	0.319842	AT5G03280,AT4G39030,AT4G21560,AT5G58270,AT2G02040
GO:0005516	calmodulin binding	0.3212	AT4G30360,AT5G20720,AT2G23320,AT5G26920
GO:0009414	response to water deprivation	0.32505	AT4G00430,AT1G20450,AT3G15500,AT3G19580,AT2G18960,AT4G35300,AT2G41430
GO:0009652	thigmotropism	0.330882	AT2G41100
GO:0042594	response to starvation	0.332254	AT5G54730
GO:0009684	indoleacetic acid biosynthetic process	0.333333	AT4G31500
GO:0010033	response to organic substance	0.333333	AT3G22200
GO:0019788	NEDD8 ligase activity	0.333333	AT4G36800
GO:0030304	trypsin inhibitor activity	0.333333	AT2G43520
GO:0004777	succinate-semialdehyde dehydrogenase activity	0.333333	AT1G79440
GO:0009759	indole glucosinolate biosynthetic process	0.333333	AT4G31500
GO:0000813	ESCRT I complex	0.333333	AT4G21560
GO:0010555	response to mannitol stimulus	0.333333	AT2G23460
GO:0006811	ion transport	0.337518	AT4G30360
GO:0005200	structural constituent of cytoskeleton	0.337719	AT5G44340
GO:0016757	transferase activity, transferring glycosyl groups	0.338888	AT1G05680,AT5G15050,AT2G31790,AT2G43820,AT5G05170,AT3G46660
GO:0004497	monooxygenase activity	0.340972	AT3G26830
GO:0016481	negative regulation of transcription	0.353196	AT5G22650
GO:0015175	neutral amino acid transmembrane transporter activity	0.370448	AT1G58360
GO:0030551	cyclic nucleotide binding	0.37241	AT4G30360
GO:0005983	starch catabolic process	0.375	AT5G17520
GO:0005315	inorganic phosphate transmembrane transporter activity	0.384615	AT5G44370
GO:0009306	protein secretion	0.384982	AT2G18710
GO:0002240	response to molecule of oomycetes origin	0.385965	AT4G20380
GO:0006970	response to osmotic stress	0.392747	AT5G03280,AT3G45640,AT1G10940
GO:0016441	posttranscriptional gene silencing	0.4	AT4G13940
GO:0002213	defense response to insect	0.405041	AT3G52430
GO:0022625	cytosolic large ribosomal subunit	0.413942	AT2G19740,AT3G55280
GO:0016564	transcription repressor activity	0.428075	AT3G19580
GO:0003994	aconitate hydratase activity	0.428571	AT4G35830
GO:0010288	response to lead ion	0.428571	AT5G58270
GO:0004634	phosphopyruvate hydratase activity	0.428571	AT2G36530
GO:0010044	response to aluminum ion	0.428571	AT5G19140
GO:0046914	transition metal ion binding	0.42877	AT3G48890
GO:0008757	S-adenosylmethionine-dependent methyltransferase activity	0.456122	AT1G02500
GO:0009266	response to temperature stimulus	0.458333	AT5G61900,AT2G41100
GO:0015112	nitrate transmembrane transporter activity	0.461538	AT3G45060
GO:0004888	transmembrane receptor activity	0.467742	AT1G66090
GO:0005852	eukaryotic translation initiation factor 3 complex	0.470588	AT1G10840
GO:0045298	tubulin complex	0.470588	AT5G44340
GO:0006952	defense response	0.471824	AT1G17420,AT5G53160,AT4G16950,AT5G05440,AT2G47730,AT4G39030,AT2G43520,AT2G14610,AT3G45860,AT5G13320,AT1G66090,AT5G05170,AT5G47910
GO:0003700	transcription factor activity	0.4794	AT3G11280,AT3G48360,AT1G58110,AT4G20380,AT1G68840,AT3G15500,AT3G19580,AT3G50260,AT2G18280,AT5G39610,AT4G17500,AT2G25900,AT5G24930,AT2G23320,AT5G63790,AT2G24790,AT5G62610,AT2G46510
GO:0003924	GTPase activity	0.479711	AT5G55190,AT4G34460
GO:0016887	ATPase activity	0.483502	AT5G51070,AT5G53170,AT1G02890,AT2G18960,AT5G18280,AT2G26140
GO:0010020	chloroplast fission	0.488142	AT1G69390
GO:0004614	phosphoglucomutase activity	0.5	AT1G23190
GO:0046961	hydrogen ion transporting ATPase activity, rotational mechanism	0.5	AT2G33040
GO:0010188	response to microbial phytotoxin	0.5	AT5G49570
GO:0045793	positive regulation of cell size	0.5	AT5G61900
GO:0005840	ribosome	0.507258	AT4G39200,AT1G07320,AT3G09630,AT5G40950,AT5G06360,AT4G16720,AT3G53890,AT3G25520,AT1G66580,AT5G03850,AT2G19740,AT1G22780,AT5G02450
GO:0016787	hydrolase activity	0.522537	AT4G12720,AT1G68620,AT3G23570
GO:0050832	defense response to fungus	0.524391	AT5G03280,AT5G64120,AT4G34460,AT2G14560
GO:0030244	cellulose biosynthetic process	0.53125	AT5G05170
GO:0009910	negative regulation of flower development	0.534884	AT3G19980
GO:0006446	regulation of translational initiation	0.538462	AT1G77840
GO:0009415	response to water	0.545455	AT1G20450
GO:0005198	structural molecule activity	0.549732	AT3G15980
GO:0045087	innate immune response	0.55946	AT2G37220
GO:0008289	lipid binding	0.562627	AT3G22600
GO:0008506	sucrose:hydrogen symporter activity	0.576694	AT1G71880
GO:0022626	cytosolic ribosome	0.576958	AT5G07090,AT4G39200,AT3G09630,AT4G16720,AT3G25520
GO:0051607	defense response to virus	0.577974	AT2G35980
GO:0009416	response to light stimulus	0.595072	AT3G47340,AT2G36530,AT1G79440,AT2G16280,AT3G62410,AT1G48030,AT1G37130
GO:0009637	response to blue light	0.628678	AT5G58140
GO:0009638	phototropism	0.63462	AT5G58140
GO:0016563	transcription activator activity	0.634759	AT4G17500
GO:0009610	response to symbiotic fungus	0.638875	AT1G37130
GO:0009738	abscisic acid mediated signaling	0.639218	AT3G45640
GO:0004617	phosphoglycerate dehydrogenase activity	0.642857	AT4G34200
GO:0016740	transferase activity	0.643102	AT5G01210
GO:0051707	response to other organism	0.659784	AT2G30110,AT3G50480,AT3G52430,AT2G35980,AT3G02840,AT1G75040
GO:0009658	chloroplast organization and biogenesis	0.661451	AT3G46740,AT4G39460
GO:0042538	hyperosmotic salinity response	0.679834	AT3G19580
GO:0000226	microtubule cytoskeleton organization and biogenesis	0.679943	AT3G43610
GO:0006098	pentose-phosphate shunt	0.68	AT4G38970
GO:0003677	DNA binding	0.683469	AT3G11280,AT5G59910,AT1G58110,AT1G68840,AT3G19580,AT3G50260,AT3G52090,AT4G17500,AT3G53710,AT2G19480,AT5G62610,AT3G54280,AT2G46510
GO:0016491	oxidoreductase activity	0.695573	AT5G51970,AT5G05600,AT2G29350
GO:0010309	acireductone dioxygenase [iron(II)-requiring] activity	0.7	AT2G26400
GO:0006355	regulation of transcription, DNA-dependent	0.700166	AT1G58110,AT1G68840,AT3G50260,AT4G17500,AT2G02710,AT1G79000,AT2G23320
GO:0010200	response to chitin	0.702188	AT3G16530,AT3G45640,AT2G23320
GO:0010193	response to ozone	0.705128	AT4G12720,AT5G49570
GO:0003676	nucleic acid binding	0.710543	AT5G42540,AT4G03120,AT3G19580,AT3G53500
GO:0009570	chloroplast stroma	0.712263	AT5G51070,AT4G38970,AT3G62410,AT2G29630,AT4G08390
GO:0004386	helicase activity	0.716298	AT3G54280
GO:0005643	nuclear pore	0.71875	AT4G17500
GO:0009631	cold acclimation	0.721482	AT1G20450
GO:0009625	response to insect	0.721509	AT3G52430
GO:0042545	cell wall modification	0.74026	AT1G11580,AT2G45220
GO:0009611	response to wounding	0.743184	AT1G17420,AT2G34810,AT3G21240
GO:0005509	calcium ion binding	0.749709	AT5G24430,AT3G56800,AT5G44090,AT1G08450,AT2G41100
GO:0005337	nucleoside transmembrane transporter activity	0.75	AT4G35300
GO:0016607	nuclear speck	0.75	AT3G13570
GO:0009916	alternative oxidase activity	0.75	AT1G32350
GO:0009664	plant-type cell wall organization and biogenesis	0.75	AT5G57560
GO:0009725	response to hormone stimulus	0.75	AT5G03280
GO:0009411	response to UV	0.754235	AT3G21240
GO:0009817	defense response to fungus, incompatible interaction	0.755707	AT4G16950
GO:0017111	nucleoside-triphosphatase activity	0.758557	AT3G10420,AT1G66090
GO:0030036	actin cytoskeleton organization and biogenesis	0.758621	AT2G38440
GO:0009741	response to brassinosteroid stimulus	0.766667	AT5G57560
GO:0010120	camalexin biosynthetic process	0.777778	AT3G26830,AT3G45640
GO:0030528	transcription regulator activity	0.77794	AT3G48360
GO:0006869	lipid transport	0.806507	AT3G22600
GO:0005834	heterotrimeric G-protein complex	0.816327	AT4G34460
GO:0007018	microtubule-based movement	0.82069	AT5G44340
GO:0043069	negative regulation of programmed cell death	0.833333	AT5G47910
GO:0042981	regulation of apoptosis	0.833333	AT5G07220
GO:0015171	amino acid transmembrane transporter activity	0.838095	AT1G58360,AT4G35180,AT3G30390
GO:0015031	protein transport	0.84092	AT1G06400,AT5G45130
GO:0010224	response to UV-B	0.844036	AT1G75040
GO:0009536	plastid	0.849286	AT3G46740,AT5G04590,AT4G39030,AT4G39460,AT2G29630,AT1G55160,AT5G58270,AT5G13490,AT2G26140,AT2G33220
GO:0009624	response to nematode	0.856059	AT2G38290,AT4G39030,AT1G58360,AT5G44370,AT1G71880
GO:0006096	glycolysis	0.857143	AT1G12000
GO:0016192	vesicle-mediated transport	0.86107	AT3G15980
GO:0009751	response to salicylic acid stimulus	0.866819	AT3G11280,AT1G15520,AT4G14400,AT2G14560,AT5G49570
GO:0006886	intracellular protein transport	0.866947	AT1G57620,AT3G15980
GO:0008654	phospholipid biosynthetic process	0.869565	AT1G68000
GO:0005794	Golgi apparatus	0.872646	AT2G21600,AT5G35160,AT5G58140,AT4G14360,AT5G44370,AT4G00750,AT5G18280,AT5G05170
GO:0004028	3-chloroallyl aldehyde dehydrogenase activity	0.875	AT1G79440
GO:0004022	alcohol dehydrogenase activity	0.877622	AT2G29350
GO:0031225	anchored to membrane	0.881301	AT3G51330,AT3G22600
GO:0046933	hydrogen ion transporting ATP synthase activity, rotational mechanism	0.882353	AT2G33040
GO:0005783	endoplasmic reticulum	0.888024	AT2G25110,AT2G21600,AT3G26830,AT3G57650,AT2G29980,AT3G25220,AT4G31500,AT4G24330,AT4G30210,AT4G34460,AT1G08450,AT4G14950,AT2G24180
GO:0009941	chloroplast envelope	0.888889	AT5G17520
GO:0015986	ATP synthesis coupled proton transport	0.888889	AT4G04640,AT2G33040
GO:0005777	peroxisome	0.88897	AT2G35690,AT4G05160,AT4G16760
GO:0005351	sugar:hydrogen symporter activity	0.890909	AT5G26340,AT5G44370,AT4G35300,AT1G11260,AT3G18830,AT1G71880
GO:0016021	integral to membrane	0.892184	AT5G35160,AT2G17500,AT3G45060,AT5G47910
GO:0005773	vacuole	0.894737	AT5G04710
GO:0008270	zinc ion binding	0.896289	AT4G24690,AT2G45530,AT1G67800,AT5G51970,AT4G08460,AT5G10650,AT4G03120,AT3G28210,AT5G01160,AT1G32340,AT3G46620,AT3G19580,AT1G63840,AT5G24930,AT2G15580,AT2G24790,AT4G32600,AT3G45770
GO:0009789	positive regulation of abscisic acid mediated signaling	0.909091	AT5G03280
GO:0005739	mitochondrion	0.910803	AT1G32350,AT2G36530,AT1G79440,AT3G22200,AT3G46740,AT5G08530,AT5G53170,AT5G11770,AT4G39030,AT1G29880,AT4G39460,AT4G31500,AT4G34200,AT4G35830,AT1G55160,AT3G45300,AT4G08390,AT1G48030,AT5G58270,AT3G22240,AT5G13490,AT4G17300,AT5G44090,AT2G26140,AT2G33040,AT3G53500,AT2G33220,AT3G45770
GO:0009706	chloroplast inner membrane	0.911765	AT5G17520
GO:0051082	unfolded protein binding	0.913279	AT5G53860
GO:0031072	heat shock protein binding	0.91486	AT5G53860
GO:0009693	ethylene biosynthetic process	0.916667	AT1G02500
GO:0004406	H3/H4 histone acetyltransferase activity	0.916667	AT1G79000
GO:0046686	response to cadmium ion	0.918367	AT5G58270
GO:0009651	response to salt stress	0.923226	AT4G12720,AT5G03280,AT4G17340,AT1G10940
GO:0042626	ATPase activity, coupled to transmembrane movement of substances	0.928571	AT1G17840,AT1G30400,AT1G15520,AT5G58270
GO:0005743	mitochondrial inner membrane	0.929288	AT5G48970,AT4G39460,AT5G13490
GO:0009737	response to abscisic acid stimulus	0.932294	AT2G23460,AT3G26830,AT3G28210,AT1G20450,AT3G19580,AT2G18960,AT1G63840,AT2G46510
GO:0005507	copper ion binding	0.933263	AT3G09390
GO:0006779	porphyrin biosynthetic process	0.933333	AT3G48730
GO:0009753	response to jasmonic acid stimulus	0.937514	AT5G03280,AT2G34810,AT1G15520
GO:0009615	response to virus	0.939437	AT5G02500
GO:0042742	defense response to bacterium	0.942355	AT4G12720,AT5G13320
GO:0005634	nucleus	0.950863	AT3G11280,AT4G24820,AT5G58350,AT2G36530,AT5G42540,AT2G23460,AT3G48360,AT1G77840,AT5G59910,AT1G58110,AT4G03120,AT1G20450,AT1G68840,AT1G67230,AT3G19580,AT3G25520,AT3G50260,AT5G39610,AT1G64040,AT3G53710,AT1G79000,AT2G19480,AT2G23320,AT2G33040,AT2G24790,AT5G62610,AT2G46510,AT3G19980
GO:0022627	cytosolic small ribosomal subunit	0.952813	AT5G07090,AT5G10360
GO:0009620	response to fungus	0.958579	AT3G21240
GO:0045449	regulation of transcription	0.964021	AT3G11280,AT2G18280,AT2G25900,AT5G24930,AT5G62610,AT2G46510
GO:0009505	plant-type cell wall	0.973164	AT1G71695,AT4G20830,AT1G11580,AT2G45220
GO:0009617	response to bacterium	0.974734	AT3G26830,AT2G41430
GO:0009733	response to auxin stimulus	0.978335	AT5G57560,AT5G19140,AT5G13320,AT4G36800
GO:0009507	chloroplast	0.982696	AT4G14680,AT1G55920,AT3G05970,AT3G10420,AT1G17420,AT5G51070,AT3G26740,AT5G16110,AT3G48730,AT5G53170,AT2G47730,AT4G04640,AT1G02890,AT5G61450,AT2G35980,AT5G13310,AT4G10840,AT5G54730,AT1G68840,AT5G19140,AT4G39460,AT1G69390,AT2G40600,AT1G75330,AT4G30210,AT2G29630,AT3G43610,AT1G35210,AT1G66090,AT5G39520,AT2G30570,AT2G35500,AT5G24930,AT1G02910,AT3G22890,AT5G20720,AT4G17300,AT1G56200,AT5G62610,AT1G09520…
GO:0009723	response to ethylene stimulus	0.985507	AT5G03280,AT1G15520
GO:0004842	ubiquitin-protein ligase activity	0.994635	AT3G17000,AT2G30110,AT3G57870,AT1G14400
GO:0007165	signal transduction	0.998338	AT5G21090,AT3G45640,AT2G02710
GO:0010118	stomatal movement	1	AT5G58140
GO:0009607	response to biotic stimulus	1	AT5G53160,AT5G05440,AT1G15520
GO:0006499	N-terminal protein myristoylation	1	AT4G29380,AT1G67800,AT5G24430,AT3G01290,AT2G47730,AT3G62290,AT4G14360,AT5G64120,AT2G37970
GO:0005216	ion channel activity	1	AT4G30360
GO:0009697	salicylic acid biosynthetic process	1	AT4G39030
GO:0009450	gamma-aminobutyric acid catabolic process	1	AT1G79440,AT3G22200
GO:0009703	nitrate reductase (NADH) activity	1	AT1G37130
GO:0008565	protein transporter activity	1	AT3G15980
GO:0019787	small conjugating protein ligase activity	1	AT4G36800
GO:0015576	sorbitol transmembrane transporter activity	1	AT3G18830
GO:0009944	polarity specification of adaxial/abaxial axis	1	AT5G22650
GO:0000786	nucleosome	1	AT5G59910
GO:0006810	transport	1	AT5G48970,AT4G17340,AT4G00430,AT4G21560,AT4G39460,AT1G11260,AT3G18830,AT4G13510,AT5G13490,AT3G45060
GO:0010119	regulation of stomatal movement	1	AT5G03280,AT2G18960
GO:0016310	phosphorylation	1	AT1G31910,AT5G26340
GO:0000169	activation of MAPK activity during osmolarity sensing	1	AT3G45640
GO:0006821	chloride transport	1	AT5G40890,AT5G49890,AT3G27170
GO:0010310	regulation of hydrogen peroxide metabolic process	1	AT4G20380,AT3G52430
GO:0015398	high affinity secondary active ammonium transmembrane transporter activity	1	AT2G38290
GO:0050311	sulfite reductase (ferredoxin) activity	1	AT5G04590
GO:0009407	toxin catabolic process	1	AT1G69930,AT1G78380,AT2G47730,AT2G29460,AT2G29470
GO:0005355	glucose transmembrane transporter activity	1	AT3G18830
GO:0048481	ovule development	1	AT3G45640,AT4G17300
GO:0009001	serine O-acetyltransferase activity	1	AT1G55920,AT5G56760
GO:0008514	organic anion transmembrane transporter activity	1	AT5G44370
GO:0010319	stromule	1	AT2G37220,AT5G04590,AT2G47730
GO:0010099	regulation of photomorphogenesis	1	AT2G24790
GO:0009102	biotin biosynthetic process	1	AT3G22200
GO:0009846	pollen germination	1	AT5G18280,AT1G71880
GO:0016020	membrane	1	AT1G57620,AT5G03280,AT4G22580,AT2G25110,AT2G18710,AT3G01290,AT1G50740,AT5G58140,AT5G26340,AT4G39030,AT4G17340,AT4G00430,AT5G15050,AT4G35180,AT4G30360,AT1G20450,AT2G18960,AT5G44370,AT4G35300,AT1G11260,AT3G30390,AT3G57630,AT3G18830,AT4G14400,AT1G71880,AT4G13510,AT2G33040,AT1G68000,AT5G47910
GO:0010091	trichome branching	1	AT2G38440
GO:0008026	ATP-dependent helicase activity	1	AT3G13920
GO:0015297	antiporter activity	1	AT4G39030
GO:0006358	regulation of transcription from RNA polymerase II promoter, global	1	AT1G79000
GO:0005792	microsome	1	AT3G26830
GO:0006665	sphingolipid metabolic process	1	AT3G51730
GO:0009672	auxin:hydrogen symporter activity	1	AT2G17500
GO:0000023	maltose metabolic process	1	AT5G17520
GO:0019853	L-ascorbic acid biosynthetic process	1	AT5G28840
GO:0042128	nitrate assimilation	1	AT1G37130
GO:0015865	purine nucleotide transport	1	AT5G13490
GO:0015805	S-adenosylmethionine transport	1	AT4G39460
GO:0004407	histone deacetylase activity	1	AT5G22650
GO:0019484	beta-alanine catabolic process	1	AT3G22200
GO:0046872	metal ion binding	1	AT1G17420,AT2G26400
GO:0009508	plastid chromosome	1	AT1G80480
GO:0006118	electron transport	1	AT1G32350,AT5G04590,AT3G48890,AT2G20260,AT4G28220,AT1G65840,AT2G41680
GO:0015591	D-ribose transmembrane transporter activity	1	AT3G18830
GO:0009749	response to glucose stimulus	1	AT2G23460
GO:0016208	AMP binding	1	AT3G48990
GO:0006334	nucleosome assembly	1	AT5G59910,AT2G19480
GO:0009955	adaxial/abaxial pattern formation	1	AT3G25520
GO:0004321	fatty-acyl-CoA synthase activity	1	AT4G05160
GO:0009853	photorespiration	1	AT4G34700,AT2G33220
GO:0000922	spindle pole	1	AT3G43610
GO:0015696	ammonium transport	1	AT2G38290,AT4G13510
GO:0007169	transmembrane receptor protein tyrosine kinase signaling pathway	1	AT3G47570
GO:0042254	ribosome biogenesis	1	AT5G06360,AT3G53890,AT3G25520,AT5G03850,AT2G19740,AT3G55280
GO:0050378	UDP-glucuronate 4-epimerase activity	1	AT3G23820
GO:0000095	S-adenosylmethionine transmembrane transporter activity	1	AT4G39460
GO:0004742	dihydrolipoyllysine-residue acetyltransferase activity	1	AT1G34430
GO:0009535	chloroplast thylakoid membrane	1	AT3G27690,AT1G15820,AT1G07320,AT3G16140,AT4G04640,AT4G01050,AT3G48890,AT2G20260,AT5G13120,AT5G01530
GO:0006865	amino acid transport	1	AT4G35180,AT3G30390
GO:0008131	amine oxidase activity	1	AT1G65840
GO:0009294	DNA mediated transformation	1	AT5G22650,AT1G79000,AT2G19480
GO:0005358	high-affinity hydrogen:glucose symporter activity	1	AT5G26340
GO:0004013	adenosylhomocysteinase activity	1	AT4G13940
GO:0016207	4-coumarate-CoA ligase activity	1	AT4G05160,AT3G21240
GO:0051127	positive regulation of actin nucleation	1	AT2G38440
GO:0000103	sulfate assimilation	1	AT4G14680
GO:0000303	response to superoxide	1	AT4G20380
GO:0047918	GDP-mannose 3,5-epimerase activity	1	AT5G28840
GO:0018316	peptide cross-linking via L-cystine	1	AT3G62410
GO:0004871	signal transducer activity	1	AT2G23460,AT2G02710
GO:0005354	galactose transmembrane transporter activity	1	AT3G18830
GO:0008137	NADH dehydrogenase (ubiquinone) activity	1	AT5G08530,AT5G11770
GO:0016702	oxidoreductase activity, acting on single donors with incorporation of molecular oxygen, incorporation of two atoms of oxygen	1	AT1G17420
GO:0007154	cell communication	1	AT5G17520
GO:0010362	negative regulation of anion channel activity by blue light	1	AT5G58140
GO:0000224	peptide-N4-(N-acetyl-beta-glucosaminyl)asparagine amidase activity	1	AT5G49570
GO:0005528	FK506 binding	1	AT3G25220
GO:0015148	D-xylose transmembrane transporter activity	1	AT3G18830
GO:0006073	glucan metabolic process	1	AT2G14620,AT4G30280
GO:0003674	molecular_function	1	AT1G15670,AT2G46150,AT4G24820,AT1G70420,AT3G05500,AT5G08240,AT1G13470,AT3G26740,AT5G16110,AT2G25110,AT5G53160,AT2G21600,AT2G20010,AT1G28330,AT1G50740,AT5G05440,AT3G50480,AT1G07020,AT3G51730,AT1G68600,AT3G16140,AT2G18440,AT2G05380,AT4G39900,AT5G61450,AT4G38260,AT2G35980,AT1G56220,AT5G13310,AT4G05440,AT2G14610,AT5G48540,AT5G54730,AT1G67230,AT2G35360,AT5G19140,AT4G01050,AT5G42030,AT2G26530,AT4G24330…
GO:0019725	cellular homeostasis	1	AT5G61900
GO:0006511	ubiquitin-dependent protein catabolic process	1	AT3G17000,AT4G24820,AT2G30110,AT4G05050,AT3G57870,AT4G02890,AT1G14400,AT1G20200
GO:0010375	stomatal complex patterning	1	AT3G45640
GO:0005363	maltose transmembrane transporter activity	1	AT5G17520
GO:0006540	glutamate decarboxylation to succinate	1	AT1G79440,AT3G22200
GO:0006997	nuclear organization and biogenesis	1	AT1G67230
GO:0015168	glycerol transmembrane transporter activity	1	AT3G18830
GO:0016004	phospholipase activator activity	1	AT3G62290
GO:0019419	sulfate reduction	1	AT5G04590
GO:0005740	mitochondrial envelope	1	AT1G32350,AT2G36530,AT5G13490
GO:0016616	oxidoreductase activity, acting on the CH-OH group of donors, NAD or NADP as acceptor	1	AT5G51970,AT4G34200
GO:0030126	COPI vesicle coat	1	AT3G15980
GO:0016174	NAD(P)H oxidase activity	1	AT5G47910
GO:0003755	peptidyl-prolyl cis-trans isomerase activity	1	AT3G25220,AT5G13120
GO:0012505	endomembrane system	1	AT3G14067,AT5G21090,AT5G14120,AT4G02410,AT1G26390,AT4G23130,AT5G03610,AT3G57260,AT3G16530,AT1G02300,AT1G50740,AT1G28600,AT3G50480,AT3G51730,AT3G62290,AT3G25220,AT4G16190,AT2G05380,AT1G30700,AT4G38260,AT2G43520,AT4G16260,AT5G63450,AT5G48540,AT3G45860,AT5G45130,AT3G03470,AT2G18690,AT3G14850,AT2G34810,AT1G63840,AT2G16660,AT5G03350,AT1G67330,AT2G34500,AT1G05720,AT3G60130,AT2G14620,AT2G17500,AT2G43570…
GO:0003997	acyl-CoA oxidase activity	1	AT2G35690,AT4G16760
GO:0010287	plastoglobule	1	AT1G15820,AT4G38970,AT2G20260,AT5G01530
GO:0005774	vacuolar membrane	1	AT1G30400,AT2G02040
GO:0005737	cytoplasm	1	AT1G69930,AT4G24690,AT5G58350,AT2G36530,AT1G77840,AT1G78380,AT4G31180,AT1G20450,AT3G25520,AT2G24200,AT2G29460,AT2G41430,AT4G29350,AT1G23190,AT1G64040,AT2G29470,AT2G38440,AT2G33040,AT4G38220,AT3G19980
GO:0047334	diphosphate-fructose-6-phosphate 1-phosphotransferase activity	1	AT1G12000
GO:0008150	biological_process	1	AT1G15670,AT2G46150,AT4G24690,AT1G70420,AT3G05500,AT5G08240,AT1G13470,AT3G26740,AT5G16110,AT2G25110,AT2G20010,AT1G28330,AT1G50740,AT3G05090,AT1G07020,AT1G19380,AT4G08460,AT1G68600,AT2G05380,AT1G22910,AT4G39900,AT5G61450,AT4G38260,AT1G56220,AT5G13310,AT5G44720,AT5G01160,AT1G32340,AT5G48540,AT5G13190,AT4G01050,AT5G42030,AT2G26530,AT4G24330,AT4G11300,AT5G04550,AT4G00750,AT2G18690,AT2G40600,AT5G10750…
GO:0006878	cellular copper ion homeostasis	1	AT3G09390
GO:0005730	nucleolus	1	AT4G25630,AT5G22650,AT3G25520,AT1G64040
GO:0031359	integral to chloroplast outer membrane	1	AT3G46740
GO:0009750	response to fructose stimulus	1	AT2G23460
GO:0047631	ADP-ribose diphosphatase activity	1	AT4G12720
GO:0006913	nucleocytoplasmic transport	1	AT3G25520
GO:0010183	pollen tube guidance	1	AT3G22200
GO:0004781	sulfate adenylyltransferase (ATP) activity	1	AT4G14680,AT3G22890
GO:0006855	multidrug transport	1	AT1G15520
GO:0006950	response to stress	1	AT1G79440,AT1G20450,AT3G45640
GO:0005829	cytosol	1	AT4G12720,AT1G55920,AT5G02500,AT5G56760,AT3G09440,AT5G49570,AT1G07890
GO:0016165	lipoxygenase activity	1	AT1G17420
GO:0032312	regulation of ARF GTPase activity	1	AT3G53710
GO:0016998	cell wall catabolic process	1	AT2G43570
GO:0001736	establishment of planar polarity	1	AT5G03280
GO:0006809	nitric oxide biosynthetic process	1	AT1G37130
GO:0003841	1-acylglycerol-3-phosphate O-acyltransferase activity	1	AT3G57650
GO:0015935	small ribosomal subunit	1	AT1G22780
GO:0045271	respiratory chain complex I	1	AT4G34700,AT5G08530,AT5G11770,AT2G33220
GO:0010197	polar nucleus fusion	1	AT4G05440
GO:0030968	endoplasmic reticulum unfolded protein response	1	AT4G34460
GO:0010266	response to vitamin B1	1	AT2G14610
GO:0010167	response to nitrate	1	AT5G40890
GO:0006413	translational initiation	1	AT1G10840,AT3G13920,AT1G22780
GO:0005759	mitochondrial matrix	1	AT1G79440,AT3G45300,AT1G48030
GO:0009882	blue light photoreceptor activity	1	AT5G58140
GO:0005575	cellular_component	1	AT3G17000,AT3G57520,AT3G52610,AT2G34770,AT1G15670,AT1G70420,AT3G05500,AT5G08240,AT3G09390,AT5G53160,AT2G30110,AT1G05680,AT1G28330,AT4G13940,AT5G05440,AT1G02500,AT1G07020,AT4G08460,AT1G68600,AT5G24080,AT3G48990,AT3G49430,AT1G48430,AT1G22910,AT3G52430,AT4G39900,AT5G28840,AT1G56220,AT3G28210,AT5G44720,AT4G05440,AT2G31790,AT2G35360,AT5G13190,AT5G42030,AT2G35020,AT3G15500,AT5G04550,AT5G07220,AT4G22530…
GO:0005618	cell wall	1	AT5G57560,AT5G64120,AT2G14620,AT4G30280
GO:0015197	peptide transporter activity	1	AT2G02040
GO:0009700	indole phytoalexin biosynthetic process	1	AT3G26830
GO:0008168	methyltransferase activity	1	AT1G55450,AT4G22530
GO:0005471	ATP:ADP antiporter activity	1	AT5G13490
GO:0031540	regulation of anthocyanin biosynthetic process	1	AT1G75040
GO:0009523	photosystem II	1	AT2G30570
GO:0004467	long-chain-fatty-acid-CoA ligase activity	1	AT3G05970
GO:0010182	sugar mediated signaling	1	AT5G03280
GO:0015992	proton transport	1	AT2G18960,AT2G33040
GO:0008219	cell death	1	AT5G03280,AT4G20380,AT4G14400
GO:0048765	root hair cell differentiation	1	AT5G03280
GO:0004148	dihydrolipoyl dehydrogenase activity	1	AT1G48030
GO:0051973	positive regulation of telomerase activity	1	AT3G48360
GO:0009926	auxin polar transport	1	AT5G03280,AT2G17500
GO:0015144	carbohydrate transmembrane transporter activity	1	AT5G26340,AT5G44370,AT4G35300,AT1G11260,AT3G18830,AT1G71880
GO:0005622	intracellular	1	AT5G40890,AT4G05050,AT5G49890,AT3G62290,AT5G01160,AT2G24200,AT5G41770,AT5G24930,AT3G55280,AT3G27170,AT3G51160
GO:0006364	rRNA processing	1	AT4G25630
GO:0003899	DNA-directed RNA polymerase activity	1	AT3G52090
GO:0009543	chloroplast thylakoid lumen	1	AT5G13120
GO:0005524	ATP binding	1	AT4G29380,AT5G51070,AT5G02500,AT1G31910,AT4G31180,AT3G09440,AT1G66090,AT3G47570,AT3G54280
GO:0009815	1-aminocyclopropane-1-carboxylate oxidase activity	1	AT2G25450
GO:0004046	aminoacylase activity	1	AT4G38220
GO:0006473	protein amino acid acetylation	1	AT1G79000
GO:0015250	water channel activity	1	AT4G17340,AT4G00430
GO:0008519	ammonium transmembrane transporter activity	1	AT2G38290,AT4G13510
GO:0031224	intrinsic to membrane	1	AT4G16950,AT1G66090
GO:0009547	plastid ribosome	1	AT1G07320
GO:0022621	shoot system development	1	AT3G22200
GO:0016743	carboxyl- or carbamoyltransferase activity	1	AT1G75330
GO:0019722	calcium-mediated signaling	1	AT3G56800
GO:0010186	positive regulation of cellular defense response	1	AT5G61900
GO:0010304	PSII associated light-harvesting complex II catabolic process	1	AT5G53170
GO:0007010	cytoskeleton organization and biogenesis	1	AT4G29350
GO:0006461	protein complex assembly	1	AT3G15980
GO:0042335	cuticle development	1	AT2G16280
GO:0031314	extrinsic to mitochondrial inner membrane	1	AT4G28220
GO:0007017	microtubule-based process	1	AT5G44340
GO:0015575	mannitol transmembrane transporter activity	1	AT3G18830
GO:0004402	histone acetyltransferase activity	1	AT1G79000
GO:0051536	iron-sulfur cluster binding	1	AT2G29630
GO:0016759	cellulose synthase activity	1	AT5G05170
GO:0016597	amino acid binding	1	AT4G34200,AT1G75330
GO:0005365	myo-inositol transmembrane transporter activity	1	AT3G18830
GO:0009744	response to sucrose stimulus	1	AT3G47340,AT2G23460,AT3G62410
GO:0008940	nitrate reductase activity	1	AT1G37130
GO:0009228	thiamin biosynthetic process	1	AT2G29630
GO:0006120	mitochondrial electron transport, NADH to ubiquinone	1	AT5G08530,AT5G11770
GO:0008097	5S rRNA binding	1	AT3G25520
GO:0051258	protein polymerization	1	AT5G44340,AT4G13510
GO:0031966	mitochondrial membrane	1	AT4G34700,AT2G33220
GO:0005801	cis-Golgi network	1	AT2G21600
GO:0000311	plastid large ribosomal subunit	1	AT1G07320
GO:0006071	glycerol metabolic process	1	AT1G48430
GO:0003958	NADPH-hemoprotein reductase activity	1	AT4G30210
GO:0005815	microtubule organizing center	1	AT3G43610
GO:0005525	GTP binding	1	AT1G06400,AT3G62290,AT5G55190,AT5G45130
GO:0000249	C-22 sterol desaturase activity	1	AT2G34500
GO:0042286	glutamate-1-semialdehyde 2,1-aminomutase activity	1	AT3G48730
GO:0010090	trichome morphogenesis	1	AT2G38440
GO:0008415	acyltransferase activity	1	AT2G16280

## Sheet: Navarro GO terms Induced
Term	Desc	PCI PVAL	Genes
GO:0016301	kinase activity	9.92493e-15	AT4G28350,AT2G47060,AT4G23180,AT2G14750,AT4G18950,AT4G26690,AT4G24400,AT5G24430,AT3G09010,AT2G40270,AT3G59700,AT4G32300,AT4G23190,AT5G25930,AT4G23280,AT2G17220
GO:0006468	protein amino acid phosphorylation	3.74074e-13	AT4G28350,AT2G47060,AT4G23180,AT2G02220,AT4G18950,AT4G24400,AT3G09010,AT2G40270,AT3G59700,AT4G32300,AT2G19130,AT4G21390,AT5G25930,AT2G17220
GO:0009698	phenylpropanoid metabolic process	2.09497e-06	AT4G30210,AT1G51680
GO:0009932	cell tip growth	3.33705e-06	AT4G26690,AT1G70140
GO:0009699	phenylpropanoid biosynthetic process	1.66703e-05	AT3G53260,AT2G37040
GO:0030599	pectinesterase activity	2.88047e-05	AT4G02330,AT2G47550
GO:0003779	actin binding	5.3477e-05	AT1G70140,AT1G59910
GO:0004601	peroxidase activity	5.37685e-05	AT5G39580,AT5G64120
GO:0010262	somatic embryogenesis	0.000235516	AT3G54420
GO:0004553	hydrolase activity, hydrolyzing O-glycosyl compounds	0.000440715	AT3G13790,AT1G61810
GO:0005516	calmodulin binding	0.000798143	AT1G61560,AT4G01010,AT2G39200,AT2G23320
GO:0016772	transferase activity, transferring phosphorus-containing groups	0.00109439	AT2G14750
GO:0004672	protein kinase activity	0.00114926	AT4G24400,AT2G19130,AT4G21390,AT4G23190
GO:0016847	1-aminocyclopropane-1-carboxylate synthase activity	0.00192784	AT4G11280
GO:0051015	actin filament binding	0.00196335	AT1G70140
GO:0008889	glycerophosphodiester phosphodiesterase activity	0.00212596	AT4G26690
GO:0006298	mismatch repair	0.00219925	AT5G58720
GO:0004630	phospholipase D activity	0.0026455	AT4G11840
GO:0009073	aromatic amino acid family biosynthetic process	0.0028844	AT4G39540
GO:0006800	oxygen and reactive oxygen species metabolic process	0.00290308	AT5G47910
GO:0045730	respiratory burst	0.0031355	AT5G64120
GO:0009695	jasmonic acid biosynthetic process	0.00321268	AT2G06050
GO:0005522	profilin binding	0.0032967	AT1G70140
GO:0010150	leaf senescence	0.0041769	AT2G38860
GO:0004723	calcium-dependent protein serine/threonine phosphatase activity	0.00464875	AT5G24430
GO:0030551	cyclic nucleotide binding	0.00516129	AT4G01010
GO:0009790	embryonic development	0.00569448	AT4G02380
GO:0008152	metabolic process	0.00659776	AT4G38540,AT4G39230,AT4G11840,AT1G55450,AT1G08940
GO:0000162	tryptophan biosynthetic process	0.00662542	AT3G54640
GO:0004564	beta-fructofuranosidase activity	0.00701296	AT3G13790
GO:0030246	carbohydrate binding	0.00735782	AT4G28350,AT4G32300
GO:0003684	damaged DNA binding	0.00740577	AT5G58720
GO:0004020	adenylylsulfate kinase activity	0.00756767	AT2G14750
GO:0004568	chitinase activity	0.00778409	AT3G54420
GO:0006470	protein amino acid dephosphorylation	0.00832421	AT2G40180
GO:0015450	P-P-bond-hydrolysis-driven protein transmembrane transporter activity	0.00841061	AT2G37410
GO:0004364	glutathione transferase activity	0.00841705	AT1G27130
GO:0048046	apoplast	0.013009	AT1G09560
GO:0015976	carbon utilization	0.0186558	AT1G70410
GO:0004765	shikimate kinase activity	0.0199665	AT4G39540
GO:0046870	cadmium ion binding	0.0204082	AT5G44070
GO:0004722	protein serine/threonine phosphatase activity	0.0253952	AT2G40180
GO:0005529	sugar binding	0.0289759	AT4G21390
GO:0009611	response to wounding	0.0318933	AT2G02220,AT3G53260,AT3G13790,AT1G51680,AT2G37040,AT2G38870,AT2G06050,AT4G11280
GO:0005515	protein binding	0.0362611	AT1G03370,AT2G42360,AT4G11360,AT4G03510,AT5G61210,AT2G46260
GO:0005975	carbohydrate metabolic process	0.036973	AT1G61810
GO:0051119	sugar transmembrane transporter activity	0.0392157	AT1G08930
GO:0045735	nutrient reservoir activity	0.0402075	AT1G09560
GO:0005507	copper ion binding	0.0507923	AT2G44790,AT5G44070,AT4G39830,AT4G38420
GO:0004497	monooxygenase activity	0.0514304	AT4G38540
GO:0009816	defense response to bacterium, incompatible interaction	0.0561224	AT4G23190
GO:0001653	peptide receptor activity	0.0571429	AT2G02220
GO:0042631	cellular response to water deprivation	0.0613354	AT4G02380
GO:0016491	oxidoreductase activity	0.0622589	AT4G39830,AT4G38420
GO:0005484	SNAP receptor activity	0.0668676	AT5G61210
GO:0003700	transcription factor activity	0.0707774	AT1G62300,AT2G23320
GO:0006811	ion transport	0.0708434	AT4G01010
GO:0009626	plant-type hypersensitive response	0.0939597	AT3G54420
GO:0009970	cellular response to sulfate starvation	0.0945946	AT1G55920
GO:0005886	plasma membrane	0.104111	AT1G70410,AT1G61560,AT5G61210,AT4G25900,AT2G39200
GO:0009817	defense response to fungus, incompatible interaction	0.104859	AT1G61560,AT2G39200
GO:0032442	phenylcoumaran benzylic ether reductase activity	0.125	AT4G39230
GO:0004712	protein serine/threonine/tyrosine kinase activity	0.133427	AT4G18950
GO:0009055	electron carrier activity	0.138141	AT4G20860
GO:0003677	DNA binding	0.146737	AT4G12040
GO:0006839	mitochondrial transport	0.149798	AT2G22500
GO:0000302	response to reactive oxygen species	0.151988	AT4G02380
GO:0006952	defense response	0.154897	AT1G61560,AT3G53260,AT5G47910,AT2G37040,AT2G03760,AT2G39200,AT4G23280
GO:0009411	response to UV	0.15534	AT1G51680
GO:0045010	actin nucleation	0.157895	AT1G70140
GO:0006979	response to oxidative stress	0.165422	AT3G53260,AT2G37040,AT1G09940,AT4G23190,AT4G02380
GO:0019825	oxygen binding	0.181562	AT4G37370
GO:0030145	manganese ion binding	0.1875	AT1G09560
GO:0050832	defense response to fungus	0.203097	AT5G39580,AT2G38870,AT5G64120
GO:0016787	hydrolase activity	0.253507	AT2G39400
GO:0010053	root epidermal cell differentiation	0.269231	AT4G26690
GO:0016192	vesicle-mediated transport	0.297053	AT5G61210
GO:0005451	monovalent cation:proton antiporter activity	0.307692	AT4G23700
GO:0009612	response to mechanical stimulus	0.307692	AT5G61210,AT4G11280
GO:0006355	regulation of transcription, DNA-dependent	0.325079	AT1G62300,AT2G23320
GO:0000299	integral to membrane of membrane fraction	0.333333	AT5G61210
GO:0006812	cation transport	0.364585	AT4G23700
GO:0009409	response to cold	0.381426	AT1G55920,AT1G09560,AT4G02380
GO:0004674	protein serine/threonine kinase activity	0.408281	AT2G02220
GO:0031225	anchored to membrane	0.428492	AT2G44790,AT4G26690
GO:0004834	tryptophan synthase activity	0.428571	AT3G54640
GO:0015031	protein transport	0.433386	AT2G37410
GO:0005741	mitochondrial outer membrane	0.441176	AT2G37410
GO:0009620	response to fungus	0.445952	AT1G51680
GO:0003824	catalytic activity	0.499808	AT1G08940
GO:0005513	detection of calcium ion	0.5	AT3G51920
GO:0030036	actin cytoskeleton organization and biogenesis	0.5	AT1G59910
GO:0045548	phenylalanine ammonia-lyase activity	0.5	AT3G53260,AT2G37040
GO:0008883	glutamyl-tRNA reductase activity	0.5	AT1G09940
GO:0009408	response to heat	0.533784	AT5G47910
GO:0008270	zinc ion binding	0.573329	AT1G70410,AT1G03370,AT2G42360,AT4G11360,AT4G03510,AT4G12040
GO:0005488	binding	0.583091	AT2G22500
GO:0004867	serine-type endopeptidase inhibitor activity	0.6	AT2G38870
GO:0005743	mitochondrial inner membrane	0.602996	AT2G37410,AT2G22500
GO:0006783	heme biosynthetic process	0.614035	AT1G09940
GO:0016021	integral to membrane	0.625512	AT5G47910,AT4G23700
GO:0005744	mitochondrial inner membrane presequence translocase complex	0.64	AT2G37410
GO:0009414	response to water deprivation	0.647436	AT3G51920
GO:0051707	response to other organism	0.666667	AT5G61210
GO:0009651	response to salt stress	0.674107	AT3G51920
GO:0008287	protein serine/threonine phosphatase complex	0.7	AT2G40180
GO:0010200	response to chitin	0.702188	AT1G08930,AT1G62300,AT2G23320
GO:0005509	calcium ion binding	0.731502	AT3G51920,AT5G24430,AT4G20780
GO:0004089	carbonate dehydratase activity	0.733333	AT1G70410
GO:0015385	sodium:hydrogen antiporter activity	0.785714	AT4G23700
GO:0043069	negative regulation of programmed cell death	0.833333	AT5G47910
GO:0010193	response to ozone	0.846154	AT2G06050
GO:0042545	cell wall modification	0.863636	AT2G47550
GO:0006808	regulation of nitrogen utilization	0.909091	AT4G39230
GO:0009507	chloroplast	0.916525	AT1G55920,AT4G30210,AT4G38550,AT3G54640,AT2G17220
GO:0009693	ethylene biosynthetic process	0.916667	AT4G11280
GO:0046686	response to cadmium ion	0.918367	AT5G44070
GO:0009723	response to ethylene stimulus	0.923913	AT4G11280
GO:0004842	ubiquitin-protein ligase activity	0.946498	AT2G42360,AT4G03510
GO:0009505	plant-type cell wall	0.947836	AT2G47550,AT4G38420
GO:0009733	response to auxin stimulus	0.948387	AT4G11280
GO:0009737	response to abscisic acid stimulus	0.949367	AT3G51920
GO:0005777	peroxisome	0.962264	AT2G06050
GO:0009753	response to jasmonic acid stimulus	0.978947	AT4G11280
GO:0005783	endoplasmic reticulum	0.98234	AT4G30210,AT4G37370
GO:0009536	plastid	0.984375	AT2G14750
GO:0005739	mitochondrion	0.993491	AT1G19140,AT2G37410
GO:0005634	nucleus	0.994676	AT4G18950,AT1G62300,AT2G23320
GO:0006118	electron transport	1	AT2G44790
GO:0005737	cytoplasm	1	AT4G18950,AT3G53260,AT2G37040,AT1G09940,AT1G27130
GO:0046685	response to arsenic	1	AT5G44070
GO:0046938	phytochelatin biosynthetic process	1	AT5G44070
GO:0045039	protein import into mitochondrial inner membrane	1	AT2G37410
GO:0009605	response to external stimulus	1	AT4G11280
GO:0015144	carbohydrate transmembrane transporter activity	1	AT1G08930
GO:0006499	N-terminal protein myristoylation	1	AT5G39580,AT5G24430,AT5G64120,AT4G23700
GO:0005216	ion channel activity	1	AT4G01010
GO:0008150	biological_process	1	AT2G37940,AT4G35110,AT4G25030,AT2G18690,AT1G03370,AT2G20960,AT4G12040,AT2G46260
GO:0008146	sulfotransferase activity	1	AT2G03760
GO:0005524	ATP binding	1	AT4G39540,AT2G14750,AT2G02220,AT5G58720
GO:0000911	cytokinesis by cell plate formation	1	AT5G61210
GO:0007169	transmembrane receptor protein tyrosine kinase signaling pathway	1	AT2G02220
GO:0006810	transport	1	AT2G22500
GO:0033014	tetrapyrrole biosynthetic process	1	AT1G09940
GO:0016310	phosphorylation	1	AT2G14750
GO:0005911	cell-cell junction	1	AT1G70140
GO:0016629	12-oxophytodienoate reductase activity	1	AT2G06050
GO:0019722	calcium-mediated signaling	1	AT3G51920
GO:0009407	toxin catabolic process	1	AT1G27130
GO:0006744	ubiquinone biosynthetic process	1	AT1G19140
GO:0006779	porphyrin biosynthetic process	1	AT1G09940
GO:0005829	cytosol	1	AT1G55920
GO:0009001	serine O-acetyltransferase activity	1	AT1G55920
GO:0016207	4-coumarate-CoA ligase activity	1	AT1G51680
GO:0000103	sulfate assimilation	1	AT2G14750
GO:0016020	membrane	1	AT5G47910,AT1G08930,AT4G11840,AT4G03510,AT4G01010,AT4G23190
GO:0046470	phosphatidylcholine metabolic process	1	AT4G11840
GO:0048544	recognition or rejection of self pollen	1	AT2G19130,AT4G21390
GO:0003674	molecular_function	1	AT2G37940,AT4G35110,AT4G25030,AT2G18690,AT1G19140,AT2G20960,AT4G02380
GO:0006511	ubiquitin-dependent protein catabolic process	1	AT4G03510
GO:0005575	cellular_component	1	AT4G35110,AT4G25030,AT5G44070,AT1G03370,AT2G20960,AT4G39230,AT3G51920,AT4G12040,AT1G51680,AT3G09010,AT2G38870,AT2G03760,AT4G11280,AT4G20780,AT2G46260,AT5G58720,AT1G08940
GO:0009504	cell plate	1	AT5G61210
GO:0005618	cell wall	1	AT4G02330,AT5G64120
GO:0016043	cellular component organization	1	AT1G59910
GO:0008168	methyltransferase activity	1	AT1G55450
GO:0006071	glycerol metabolic process	1	AT4G26690
GO:0004034	aldose 1-epimerase activity	1	AT4G25900
GO:0016756	glutathione gamma-glutamylcysteinyltransferase activity	1	AT5G44070
GO:0003958	NADPH-hemoprotein reductase activity	1	AT4G30210
GO:0016174	NAD(P)H oxidase activity	1	AT5G47910
GO:0006944	membrane fusion	1	AT5G61210
GO:0012505	endomembrane system	1	AT4G02330,AT2G18690,AT4G28350,AT5G39580,AT2G02220,AT3G54420,AT3G13790,AT4G39830,AT2G38860,AT1G61810,AT2G40270,AT3G59700,AT4G32300,AT2G19130,AT4G21390,AT4G20860,AT1G09560,AT5G25930,AT4G23280
GO:0008631	induction of apoptosis by oxidative stress	1	AT4G11280
GO:0008219	cell death	1	AT1G61560,AT2G39200
GO:0005351	sugar:hydrogen symporter activity	1	AT1G08930
GO:0046872	metal ion binding	1	AT1G09560
GO:0048765	root hair cell differentiation	1	AT4G26690
GO:0006012	galactose metabolic process	1	AT4G25900

## Sheet: Thilmony GO terms Induced
Term	Desc	PCI PVAL	Genes
GO:0016301	kinase activity	1.1687e-39	AT1G51890,AT5G20050,AT5G01850,AT5G61560,AT4G21410,AT2G37710,AT4G04960,AT5G01560,AT1G16130,AT4G23190,AT5G25930,AT1G61360,AT5G46080,AT4G18250,AT5G58940,AT1G51820,AT4G28350,AT1G28390,AT4G18950,AT2G23770,AT1G51800,AT1G05700,AT3G59700,AT2G39660,AT1G66830,AT5G25440,AT1G25390,AT5G65600,AT2G19190,AT5G01550,AT4G23150,AT3G05360,AT5G51830,AT4G04510,AT1G53430,AT4G04490,AT1G51850,AT1G16150,AT1G51860,AT1G51790…
GO:0006468	protein amino acid phosphorylation	7.55819e-39	AT1G51890,AT2G02220,AT5G20050,AT5G01850,AT5G61560,AT4G04960,AT5G01560,AT1G16130,AT5G25930,AT1G61360,AT5G46080,AT4G18250,AT5G58940,AT1G51820,AT4G28350,AT1G28390,AT4G18950,AT2G23770,AT1G51800,AT1G05700,AT3G59700,AT1G66830,AT5G25440,AT1G25390,AT5G65600,AT5G01550,AT4G23150,AT3G13380,AT4G04510,AT4G39270,AT1G53430,AT4G04490,AT1G51850,AT1G16150,AT1G51860,AT1G74360,AT1G51790,AT1G18390,AT1G51620
GO:0004601	peroxidase activity	9.20965e-14	AT4G36430,AT5G64120,AT5G39580,AT5G64100,AT4G08770,AT1G14540
GO:0006629	lipid metabolic process	1.80045e-09	AT5G24210,AT2G26560,AT5G03610,AT2G30550,AT5G55050
GO:0006508	proteolysis	9.23679e-09	AT1G32960,AT2G27920,AT1G44130,AT5G48430,AT3G51330,AT4G25110
GO:0004364	glutathione transferase activity	5.40293e-07	AT1G69930,AT3G09270,AT2G29460
GO:0030599	pectinesterase activity	1.42369e-06	AT2G26440,AT2G45220,AT4G02330
GO:0005975	carbohydrate metabolic process	1.80617e-06	AT3G03640,AT4G16260,AT5G56870,AT4G19810
GO:0016563	transcription activator activity	2.43642e-06	AT4G17500,AT4G23810,AT1G06160
GO:0009699	phenylpropanoid biosynthetic process	2.78334e-06	AT2G30490,AT2G37040
GO:0005199	structural constituent of cell wall	1.38386e-05	AT1G21310,AT1G76930
GO:0004722	protein serine/threonine phosphatase activity	1.58921e-05	AT2G40180,AT1G07160,AT5G06750
GO:0004568	chitinase activity	1.73546e-05	AT2G43620,AT3G54420,AT4G01700,AT1G02360
GO:0008289	lipid binding	2.57437e-05	AT4G12500,AT5G64080,AT4G12490,AT4G12480,AT3G22600,AT4G22470
GO:0005516	calmodulin binding	3.12234e-05	AT1G01340,AT4G24240,AT2G39200,AT1G61560,AT3G45290,AT4G33050,AT2G41010,AT4G31550,AT2G24570,AT5G26920
GO:0016706	oxidoreductase activity, acting on paired donors, with incorporation or reduction of molecular oxygen, 2-oxoglutarate as one donor, and incorporation of one atom each of oxygen into both donors	4.2204e-05	AT3G13610,AT2G36690
GO:0016564	transcription repressor activity	5.6278e-05	AT1G27730,AT5G67450
GO:0006470	protein amino acid dephosphorylation	6.74837e-05	AT2G40180,AT1G07160
GO:0016567	protein ubiquitination	8.66825e-05	AT2G35930,AT5G61560
GO:0009055	electron carrier activity	9.06975e-05	AT1G26410,AT1G26380,AT1G26390,AT5G44380,AT1G30700,AT1G26420,AT5G44390
GO:0004091	carboxylesterase activity	0.00019846	AT5G03610,AT5G55050
GO:0010262	somatic embryogenesis	0.000235516	AT3G54420
GO:0035264	multicellular organism growth	0.000248571	AT1G27730
GO:0009838	abscission	0.000248942	AT1G68765
GO:0016710	trans-cinnamate 4-monooxygenase activity	0.000265322	AT2G30490
GO:0005201	extracellular matrix structural constituent	0.000298775	AT3G07390
GO:0005212	structural constituent of eye lens	0.000298775	AT5G52810
GO:0006857	oligopeptide transport	0.000354317	AT5G55930,AT4G27730,AT5G46050,AT1G65730
GO:0004806	triacylglycerol lipase activity	0.000405291	AT5G24210,AT2G30550
GO:0004648	phosphoserine transaminase activity	0.000545703	AT4G35630
GO:0015559	multidrug efflux pump activity	0.000571919	AT4G39030
GO:0004049	anthranilate synthase activity	0.000827586	AT5G05730
GO:0019496	serine-isocitrate lyase pathway	0.000894055	AT1G74030
GO:0006564	L-serine biosynthetic process	0.00111259	AT4G35630
GO:0030246	carbohydrate binding	0.0011779	AT1G61360,AT4G28350,AT1G65390,AT3G16530,AT2G02230
GO:0006869	lipid transport	0.00120942	AT4G12500,AT5G64080,AT4G12490,AT4G12480,AT3G22600,AT4G22470
GO:0004675	transmembrane receptor protein serine/threonine kinase activity	0.00134288	AT4G18250
GO:0010227	floral organ abscission	0.00149254	AT1G68765
GO:0010015	root morphogenesis	0.00173827	AT1G31930
GO:0003700	transcription factor activity	0.00176187	AT5G13080,AT1G27730,AT4G17500,AT3G23250,AT1G18570,AT4G24240,AT4G31800,AT4G01250,AT4G01720,AT3G55980,AT1G68150,AT5G67450,AT5G15130,AT2G38250,AT4G31550,AT5G52830,AT1G68840,AT4G23810,AT2G24570,AT1G06160,AT5G64530,AT3G50260,AT5G22570,AT2G37430
GO:0015035	protein disulfide oxidoreductase activity	0.00186368	AT5G38900
GO:0016847	1-aminocyclopropane-1-carboxylate synthase activity	0.00192784	AT4G26200
GO:0009887	organ morphogenesis	0.00272885	AT3G49780
GO:0006355	regulation of transcription, DNA-dependent	0.00311335	AT5G13080,AT4G17500,AT3G23250,AT1G18570,AT4G24240,AT4G31800,AT4G01250,AT4G01720,AT4G18430,AT1G68150,AT5G15130,AT4G31550,AT5G52830,AT1G68840,AT4G23810,AT2G24570,AT1G06160,AT3G50260,AT5G22570
GO:0015690	aluminum ion transport	0.00318471	AT5G20230
GO:0000162	tryptophan biosynthetic process	0.00331785	AT5G05730
GO:0009225	nucleotide-sugar metabolic process	0.00355714	AT4G20460
GO:0010386	lateral root primordium development	0.00367377	AT5G05730
GO:0016298	lipase activity	0.00399042	AT2G26560
GO:0010150	leaf senescence	0.0041769	AT2G38860
GO:0009790	embryonic development	0.00569448	AT4G02380
GO:0048527	lateral root development	0.00685684	AT5G13080
GO:0007568	aging	0.00815016	AT3G49620
GO:0015979	photosynthesis	0.00821857	AT1G27730
GO:0006633	fatty acid biosynthetic process	0.00837989	AT1G64400
GO:0009626	plant-type hypersensitive response	0.00854179	AT2G26560,AT3G54420
GO:0043620	regulation of transcription in response to stress	0.0120482	AT5G13080
GO:0015692	lead ion transport	0.0126984	AT1G15520
GO:0045730	respiratory burst	0.0143337	AT5G64120
GO:0007275	multicellular organismal development	0.0171317	AT5G64530
GO:0010107	potassium ion import	0.0174924	AT5G47100
GO:0004888	transmembrane receptor activity	0.0203514	AT5G45000,AT1G57630,AT5G44910,AT5G17890,AT4G11170
GO:0010421	hydrogen peroxide-mediated programmed cell death	0.037037	AT3G13610
GO:0030551	cyclic nucleotide binding	0.0386156	AT1G01340,AT4G32650
GO:0015145	monosaccharide transmembrane transporter activity	0.0392157	AT3G19930
GO:0004674	protein serine/threonine kinase activity	0.0402983	AT2G02220,AT1G66830,AT4G39270,AT1G74360
GO:0006457	protein folding	0.0417559	AT5G02490
GO:0019825	oxygen binding	0.0418001	AT2G27690,AT5G57220,AT1G13110,AT2G30750
GO:0019748	secondary metabolic process	0.0423783	AT3G13610
GO:0007186	G-protein coupled receptor protein signaling pathway	0.044586	AT1G31930
GO:0009267	cellular response to starvation	0.0447761	AT3G49620
GO:0004553	hydrolase activity, hydrolyzing O-glycosyl compounds	0.0450976	AT3G13790,AT3G03640,AT4G16260,AT4G19810
GO:0005886	plasma membrane	0.0481221	AT5G47100,AT3G55740,AT1G15520,AT3G07390,AT2G39660,AT4G32650,AT2G39200,AT4G13510,AT1G61560,AT5G17760,AT3G45290,AT2G47800,AT1G16150
GO:0004712	protein serine/threonine/tyrosine kinase activity	0.048636	AT5G01850,AT4G18950
GO:0051861	glycolipid binding	0.0498192	AT4G39670
GO:0009611	response to wounding	0.0541009	AT2G02220,AT3G13790,AT1G27730,AT2G30490,AT2G37040,AT5G05730,AT1G76930,AT5G50200,AT5G20230
GO:0001653	peptide receptor activity	0.0571429	AT2G02220
GO:0006888	ER to Golgi vesicle-mediated transport	0.06	AT3G52190
GO:0009646	response to absence of light	0.0625	AT5G20230
GO:0008083	growth factor activity	0.0651229	AT3G49780
GO:0015112	nitrate transmembrane transporter activity	0.0699301	AT1G12940,AT5G50200,AT3G45060
GO:0005451	monovalent cation:proton antiporter activity	0.0769231	AT1G64170,AT4G23700
GO:0015824	proline transport	0.0789474	AT3G55740
GO:0015193	L-proline transmembrane transporter activity	0.0833333	AT3G55740
GO:0016046	detection of fungus	0.0882353	AT5G13320
GO:0046777	protein amino acid autophosphorylation	0.0902891	AT2G39660
GO:0005102	receptor binding	0.094964	AT1G68765
GO:0006813	potassium ion transport	0.103245	AT1G70300
GO:0009863	salicylic acid mediated signaling pathway	0.10739	AT5G13320,AT1G28480
GO:0043090	amino acid import	0.108108	AT5G40780
GO:0005507	copper ion binding	0.109018	AT2G44790,AT5G20230,AT4G39830
GO:0010117	photoprotection	0.109806	AT1G27730
GO:0019595	non-phosphorylated glucose catabolic process	0.111111	AT1G74030
GO:0006952	defense response	0.115952	AT5G13320,AT5G64905,AT1G22900,AT5G45000,AT1G65390,AT1G57630,AT5G44910,AT1G19610,AT5G17890,AT2G37040,AT2G39200,AT4G39030,AT1G61560,AT3G45290,AT3G05360,AT1G71400,AT4G11170,AT4G23280
GO:0006812	cation transport	0.116496	AT1G64170,AT4G23700,AT1G05300
GO:0046836	glycolipid transport	0.122722	AT4G39670
GO:0007242	intracellular signaling cascade	0.140183	AT2G42060,AT4G01920
GO:0004564	beta-fructofuranosidase activity	0.140448	AT3G13790
GO:0005576	extracellular region	0.151636	AT1G68765,AT3G07390
GO:0005529	sugar binding	0.153692	AT5G03700
GO:0009814	defense response, incompatible interaction	0.154481	AT5G64890
GO:0005242	inward rectifier potassium channel activity	0.155172	AT4G32650
GO:0016740	transferase activity	0.158158	AT5G42830,AT5G61160
GO:0005515	protein binding	0.162555	AT4G03450,AT3G55150,AT2G42360,AT1G63840,AT2G39380,AT2G35910,AT2G25470,AT5G27420,AT5G17890,AT4G14365,AT3G13380,AT3G05360,AT1G08050,AT1G71400,AT1G02450,AT4G23810,AT5G37580,AT4G11170
GO:0046983	protein dimerization activity	0.166922	AT1G21120
GO:0009652	thigmotropism	0.176471	AT1G31930
GO:0009970	cellular response to sulfate starvation	0.181414	AT1G78000
GO:0005950	anthranilate synthase complex	0.181818	AT5G05730
GO:0000015	phosphopyruvate hydratase complex	0.181818	AT1G74030
GO:0050832	defense response to fungus	0.190132	AT5G64120,AT4G12490,AT2G39660,AT4G31800,AT4G12480,AT5G39580
GO:0006979	response to oxidative stress	0.195061	AT1G13340,AT1G27730,AT4G23190,AT1G52200,AT2G37040,AT5G44380,AT5G20230,AT4G02380,AT5G64100,AT4G08770,AT1G14540
GO:0019642	anaerobic glycolysis	0.195578	AT1G74030
GO:0006811	ion transport	0.199292	AT1G01340
GO:0010045	response to nickel ion	0.2	AT1G16150
GO:0042631	cellular response to water deprivation	0.201593	AT4G02380
GO:0009651	response to salt stress	0.203807	AT1G27730,AT3G23250,AT1G18570,AT2G41010
GO:0010204	defense response signaling pathway, resistance gene-independent	0.211921	AT3G05360
GO:0016481	negative regulation of transcription	0.219538	AT1G02450
GO:0008194	UDP-glycosyltransferase activity	0.221914	AT3G46690,AT3G11340
GO:0009644	response to high light intensity	0.235294	AT1G27730
GO:0008506	sucrose:hydrogen symporter activity	0.240404	AT3G19930
GO:0045735	nutrient reservoir activity	0.243422	AT2G26560
GO:0009861	jasmonic acid and ethylene-dependent systemic resistance	0.247968	AT1G06160
GO:0019564	aerobic glycerol catabolic process	0.25	AT1G74030
GO:0045941	positive regulation of transcription	0.270237	AT4G23810
GO:0007264	small GTPase mediated signal transduction	0.27025	AT1G09630,AT4G18430,AT3G21700
GO:0010017	red or far red light signaling pathway	0.274121	AT4G25350
GO:0009851	auxin biosynthetic process	0.3	AT5G05730
GO:0005509	calcium ion binding	0.304348	AT5G47100,AT4G16350,AT3G47480,AT3G01830
GO:0009414	response to water deprivation	0.309653	AT2G35930,AT5G47100,AT1G27730,AT2G47800,AT2G41010
GO:0009816	defense response to bacterium, incompatible interaction	0.311892	AT5G13320,AT4G23190,AT4G23810
GO:0005215	transporter activity	0.317334	AT4G39030,AT3G23550,AT5G46050,AT4G36640
GO:0000304	response to singlet oxygen	0.317998	AT1G61120
GO:0006954	inflammatory response	0.319146	AT3G51660
GO:0008287	protein serine/threonine phosphatase complex	0.327586	AT5G47100,AT2G40180,AT1G07160
GO:0009759	indole glucosinolate biosynthetic process	0.333333	AT1G18570
GO:0010555	response to mannitol stimulus	0.333333	AT1G31930
GO:0019544	arginine catabolic process to glutamate	0.333333	AT5G52810
GO:0016036	cellular response to phosphate starvation	0.334237	AT3G52190
GO:0004672	protein kinase activity	0.343915	AT4G23190,AT3G13380
GO:0016798	hydrolase activity, acting on glycosyl bonds	0.353739	AT5G15870
GO:0000302	response to reactive oxygen species	0.354957	AT4G02380
GO:0008270	zinc ion binding	0.35877	AT2G42360,AT1G63840,AT1G27730,AT2G35910,AT5G27420,AT2G27660,AT5G17890,AT5G67450,AT4G14365,AT1G08050,AT2G37430
GO:0002213	defense response to insect	0.363546	AT1G61120
GO:0042742	defense response to bacterium	0.36812	AT5G13320,AT4G31800,AT2G19190,AT4G31550,AT1G02450,AT2G24570
GO:0017089	glycolipid transporter activity	0.375	AT4G39670
GO:0008171	O-methyltransferase activity	0.376773	AT1G21120
GO:0006874	cellular calcium ion homeostasis	0.380435	AT2G29100,AT5G11210
GO:0004634	phosphopyruvate hydratase activity	0.428571	AT1G74030
GO:0009817	defense response to fungus, incompatible interaction	0.440306	AT2G39200,AT1G61560
GO:0000145	exocyst	0.452381	AT3G55150,AT2G39380
GO:0008152	metabolic process	0.453056	AT4G22530,AT5G52810,AT1G68620,AT2G47140,AT3G46690,AT5G06570,AT3G11340
GO:0016491	oxidoreductase activity	0.459527	AT3G49620,AT2G47140,AT4G39830
GO:0042538	hyperosmotic salinity response	0.465912	AT5G67450
GO:0000166	nucleotide binding	0.474587	AT3G52190,AT1G24530,AT4G11170
GO:0010200	response to chitin	0.476418	AT2G35930,AT1G27730,AT3G16530,AT1G66160,AT2G24570,AT2G37430
GO:0005887	integral to plasma membrane	0.482071	AT3G19930
GO:0006094	gluconeogenesis	0.5	AT1G74030
GO:0004866	endopeptidase inhibitor activity	0.5	AT1G17860
GO:0008643	carbohydrate transport	0.507512	AT4G36670
GO:0009873	ethylene mediated signaling pathway	0.508278	AT1G06160
GO:0051607	defense response to virus	0.513033	AT2G35980
GO:0015385	sodium:hydrogen antiporter activity	0.537594	AT1G64170,AT4G23700
GO:0015031	protein transport	0.549147	AT1G09630,AT4G18430
GO:0010043	response to zinc ion	0.555556	AT1G16150
GO:0009723	response to ethylene stimulus	0.563417	AT1G68765,AT1G31930,AT3G23250,AT1G18570,AT1G15520,AT5G05730,AT1G06160
GO:0048046	apoplast	0.564959	AT1G32960
GO:0004386	helicase activity	0.56499	AT1G33390
GO:0016787	hydrolase activity	0.567723	AT1G68620,AT5G06570
GO:0009617	response to bacterium	0.56939	AT5G05730,AT2G30750,AT5G02490
GO:0000151	ubiquitin ligase complex	0.572085	AT5G61560,AT1G66160,AT5G09800
GO:0009630	gravitropism	0.590909	AT1G31930
GO:0051707	response to other organism	0.592653	AT4G36430,AT2G35980,AT3G51660
GO:0015116	sulfate transmembrane transporter activity	0.611111	AT1G78000
GO:0009737	response to abscisic acid stimulus	0.618625	AT4G21410,AT3G22060,AT1G63840,AT1G27730,AT1G31930,AT1G18570,AT5G27420,AT1G76930,AT5G01540
GO:0009058	biosynthetic process	0.622746	AT2G36690
GO:0009867	jasmonic acid mediated signaling pathway	0.634496	AT1G28480
GO:0009341	beta-galactosidase complex	0.64	AT5G56870
GO:0003676	nucleic acid binding	0.650991	AT1G27730,AT5G67450,AT2G37430
GO:0009505	plant-type cell wall	0.663869	AT2G26440,AT1G32960,AT2G30490,AT1G44130,AT2G45220,AT1G16150
GO:0006537	glutamate biosynthetic process	0.666667	AT5G38710
GO:0006562	proline catabolic process	0.666667	AT5G38710
GO:0009624	response to nematode	0.694445	AT4G32650,AT4G39030,AT2G47800
GO:0003824	catalytic activity	0.707761	AT4G20460,AT5G52810,AT2G39420,AT1G64400
GO:0005643	nuclear pore	0.71875	AT4G17500
GO:0015198	oligopeptide transporter activity	0.727273	AT5G55930,AT4G27730,AT1G65730
GO:0009408	response to heat	0.739267	AT4G21870,AT5G02490
GO:0042545	cell wall modification	0.74026	AT2G26440,AT2G45220
GO:0009416	response to light stimulus	0.747448	AT2G29100,AT5G11210,AT3G49620,AT2G30490
GO:0009916	alternative oxidase activity	0.75	AT1G32350
GO:0045548	phenylalanine ammonia-lyase activity	0.75	AT2G37040
GO:0009664	plant-type cell wall organization and biogenesis	0.75	AT1G21310
GO:0016887	ATPase activity	0.75204	AT5G57480,AT3G50930
GO:0015079	potassium ion transmembrane transporter activity	0.757143	AT1G70300
GO:0009733	response to auxin stimulus	0.764491	AT5G13320,AT3G23250,AT1G18570,AT3G07390,AT2G45210
GO:0005986	sucrose biosynthetic process	0.764706	AT5G51830
GO:0009620	response to fungus	0.780613	AT2G39660
GO:0003677	DNA binding	0.78732	AT4G17500,AT3G23250,AT1G18570,AT5G67450,AT1G68840,AT4G23810,AT1G06160,AT3G50260
GO:0009735	response to cytokinin stimulus	0.794872	AT1G03850
GO:0005834	heterotrimeric G-protein complex	0.816327	AT1G24530
GO:0019654	acetate fermentation	0.818182	AT5G51830,AT1G74030
GO:0009507	chloroplast	0.835199	AT4G35630,AT5G52810,AT1G52200,AT1G65390,AT1G07160,AT2G27660,AT2G30550,AT5G05730,AT1G67810,AT2G22880,AT2G35980,AT1G08050,AT1G61800,AT1G68840,AT1G74030
GO:0015171	amino acid transmembrane transporter activity	0.838095	AT3G55740,AT4G35180,AT5G40780
GO:0009751	response to salicylic acid stimulus	0.841324	AT2G37710,AT1G18570,AT1G15520,AT1G28480,AT4G31800,AT1G76930
GO:0046686	response to cadmium ion	0.841837	AT3G23250,AT1G16150
GO:0019513	lactose catabolic process, using glucoside 3-dehydrogenase	0.857143	AT5G56870
GO:0006096	glycolysis	0.857143	AT1G74030
GO:0004356	glutamate-ammonia ligase activity	0.857143	AT5G37600
GO:0009061	anaerobic respiration	0.866667	AT1G74030
GO:0031225	anchored to membrane	0.867798	AT5G64080,AT3G07390,AT3G51330,AT2G44790,AT5G20230,AT3G22600
GO:0004842	ubiquitin-protein ligase activity	0.870305	AT2G35930,AT2G42360,AT1G66160,AT5G09800,AT1G08050
GO:0017111	nucleoside-triphosphatase activity	0.87234	AT4G11170
GO:0009409	response to cold	0.872554	AT1G27730,AT5G67450,AT4G02380
GO:0006904	vesicle docking during exocytosis	0.875	AT3G55150,AT2G39380
GO:0009739	response to gibberellin stimulus	0.875	AT1G18570
GO:0009753	response to jasmonic acid stimulus	0.877044	AT1G61120,AT3G23250,AT1G18570,AT1G15520,AT1G76930,AT1G06160
GO:0019515	lactose catabolic process via UDP-galactose	0.904762	AT5G56870
GO:0009693	ethylene biosynthetic process	0.916667	AT4G26200
GO:0031348	negative regulation of defense response	0.926316	AT4G39030
GO:0007165	signal transduction	0.939612	AT2G25470,AT3G05360,AT1G71400
GO:0005488	binding	0.939713	AT1G66160,AT5G37590,AT5G09800
GO:0042626	ATPase activity, coupled to transmembrane movement of substances	0.946429	AT1G15520,AT3G62150,AT2G47800
GO:0016021	integral to membrane	0.951391	AT5G11210,AT1G64170,AT4G25350,AT3G62150,AT1G61800,AT4G23700,AT1G78000,AT3G45060,AT1G05300
GO:0005634	nucleus	0.959547	AT5G13080,AT1G27730,AT1G31930,AT4G25350,AT4G18950,AT4G24240,AT2G39660,AT5G25440,AT4G31800,AT4G01250,AT4G01720,AT1G68150,AT5G67450,AT5G15130,AT2G41010,AT4G31550,AT5G52830,AT1G68840,AT4G23810,AT2G24570,AT1G06160,AT3G50260,AT5G22570
GO:0048367	shoot development	0.96	AT5G64530
GO:0016757	transferase activity, transferring glycosyl groups	0.962419	AT3G46690
GO:0005351	sugar:hydrogen symporter activity	0.963636	AT3G19930,AT4G36670
GO:0009536	plastid	0.968873	AT3G50930,AT4G39030
GO:0005739	mitochondrion	0.970875	AT1G32350,AT3G50930,AT5G48530,AT2G27920,AT4G39030,AT5G37580,AT1G74360,AT4G11170,AT5G06750
GO:0005783	endoplasmic reticulum	0.973569	AT2G30490,AT4G32650,AT3G52190
GO:0048364	root development	0.97619	AT1G31930
GO:0045449	regulation of transcription	0.981928	AT3G55980,AT2G38250,AT2G37430
GO:0010118	stomatal movement	1	AT5G47100,AT2G47800
GO:0005737	cytoplasm	1	AT1G69930,AT2G26560,AT4G18950,AT2G37040,AT2G39660,AT5G25440,AT3G09270,AT4G39670,AT2G29460
GO:0031347	regulation of defense response	1	AT4G31800,AT4G23810
GO:0009607	response to biotic stimulus	1	AT1G15520
GO:0006499	N-terminal protein myristoylation	1	AT5G47100,AT5G64120,AT2G39660,AT5G25440,AT5G39580,AT4G23700,AT3G28850,AT5G01540
GO:0006817	phosphate transport	1	AT3G52190
GO:0005216	ion channel activity	1	AT1G01340
GO:0008517	folic acid transporter activity	1	AT2G47800
GO:0009697	salicylic acid biosynthetic process	1	AT4G39030
GO:0006014	D-ribose metabolic process	1	AT5G51830
GO:0008150	biological_process	1	AT1G65690,AT3G43250,AT2G18690,AT5G62770,AT5G53110,AT5G42830,AT3G05500,AT1G13340,AT4G26060,AT4G19370,AT5G48530,AT2G25735,AT1G17860,AT4G23010,AT4G24110,AT5G44990,AT1G52200,AT5G12930,AT2G39210,AT1G18380,AT1G79450,AT3G18250,AT4G23610,AT5G38900,AT5G37590,AT3G25130,AT3G46280,AT5G46230,AT5G05190,AT3G47480,AT1G63530,AT5G12340,AT4G20000,AT1G67810,AT2G22880,AT1G51920,AT2G39530,AT5G10695,AT5G02780,AT4G38560…
GO:0005730	nucleolus	1	AT2G39660
GO:0006810	transport	1	AT3G62150,AT4G13510,AT4G36670,AT3G45060,AT4G36640
GO:0009750	response to fructose stimulus	1	AT1G31930
GO:0005990	lactose catabolic process	1	AT5G56870
GO:0004657	proline dehydrogenase activity	1	AT5G38710
GO:0019683	glyceraldehyde-3-phosphate catabolic process	1	AT1G74030
GO:0009407	toxin catabolic process	1	AT1G69930,AT3G09270,AT2G29460
GO:0006855	multidrug transport	1	AT1G15520,AT3G23550,AT2G47800
GO:0006950	response to stress	1	AT5G61560,AT5G47100
GO:0008283	cell proliferation	1	AT3G49780
GO:0005829	cytosol	1	AT5G37600,AT2G35930,AT4G25350,AT1G21120,AT5G02490
GO:0016998	cell wall catabolic process	1	AT2G23770,AT4G01700,AT5G62150,AT1G02360
GO:0004565	beta-galactosidase activity	1	AT5G56870
GO:0016020	membrane	1	AT1G70300,AT1G01340,AT2G29100,AT5G11210,AT4G23190,AT3G55740,AT2G26560,AT5G55930,AT1G79450,AT2G36330,AT3G19930,AT4G39030,AT4G13510,AT4G27730,AT4G35180,AT3G23550,AT4G36670,AT5G46050,AT2G39530,AT1G61800,AT5G40780,AT1G78000,AT1G05300
GO:0010197	polar nucleus fusion	1	AT4G33050
GO:0015297	antiporter activity	1	AT4G39030,AT3G23550,AT1G61800
GO:0010167	response to nitrate	1	AT5G50200
GO:0030198	extracellular matrix organization and biogenesis	1	AT3G07390
GO:0019575	sucrose catabolic process, using beta-fructofuranosidase	1	AT5G51830
GO:0015706	nitrate transport	1	AT5G50200
GO:0005575	cellular_component	1	AT3G43250,AT5G64890,AT4G22530,AT5G42830,AT3G05500,AT1G26410,AT5G24210,AT4G26060,AT1G61120,AT1G16130,AT3G13610,AT5G13320,AT5G64905,AT1G68620,AT4G23010,AT4G24110,AT5G44990,AT5G58940,AT2G39210,AT2G47140,AT2G42060,AT1G28390,AT5G24230,AT3G18250,AT4G23610,AT1G30110,AT5G38900,AT5G37590,AT1G28480,AT3G25130,AT5G46230,AT5G05190,AT4G21870,AT4G01920,AT3G55980,AT1G63530,AT2G17740,AT4G20000,AT4G26200,AT5G06570…
GO:0004081	bis(5'-nucleosyl)-tetraphosphatase (asymmetrical) activity	1	AT1G30110
GO:0005618	cell wall	1	AT5G64120,AT4G02330
GO:0019468	nopaline catabolic process	1	AT5G52810
GO:0008168	methyltransferase activity	1	AT4G22530,AT1G21120
GO:0030154	cell differentiation	1	AT3G49780
GO:0019650	glucose catabolic process to butanediol	1	AT1G74030
GO:0042128	nitrate assimilation	1	AT5G37600
GO:0019656	glucose catabolic process to D-lactate and ethanol	1	AT1G74030
GO:0008219	cell death	1	AT2G39200,AT1G61560,AT3G45290
GO:0009986	cell surface	1	AT1G16150
GO:0008324	cation transmembrane transporter activity	1	AT1G05300
GO:0006118	electron transport	1	AT1G32350,AT1G28480,AT2G44790,AT1G03850,AT5G20230,AT3G28850
GO:0009749	response to glucose stimulus	1	AT1G31930
GO:0015144	carbohydrate transmembrane transporter activity	1	AT3G19930,AT4G36670
GO:0005622	intracellular	1	AT4G18430,AT3G21700,AT4G36640,AT2G37430
GO:0009543	chloroplast thylakoid lumen	1	AT1G79450
GO:0005524	ATP binding	1	AT2G02220,AT3G50930,AT5G17890,AT1G66830,AT5G17760,AT3G53230,AT4G39270,AT1G33390,AT1G74360,AT4G11170,AT5G02490
GO:0010337	regulation of salicylic acid metabolic process	1	AT2G41010
GO:0015696	ammonium transport	1	AT4G13510
GO:0007169	transmembrane receptor protein tyrosine kinase signaling pathway	1	AT2G02220,AT1G66830,AT4G39270,AT1G74360
GO:0032107	regulation of response to nutrient levels	1	AT5G13080
GO:0010102	lateral root morphogenesis	1	AT3G07390
GO:0031012	extracellular matrix	1	AT3G49780
GO:0008519	ammonium transmembrane transporter activity	1	AT4G13510
GO:0031224	intrinsic to membrane	1	AT5G45000,AT1G65390,AT1G57630,AT5G44910,AT5G17890
GO:0046873	metal ion transmembrane transporter activity	1	AT1G05300
GO:0019722	calcium-mediated signaling	1	AT4G16350
GO:0006865	amino acid transport	1	AT3G55740,AT4G35180,AT5G40780
GO:0015152	glucose-6-phosphate transmembrane transporter activity	1	AT1G61800
GO:0015770	sucrose transport	1	AT3G19930
GO:0015712	hexose phosphate transport	1	AT1G61800
GO:0019469	octopine catabolic process	1	AT5G52810
GO:0004871	signal transducer activity	1	AT1G31930
GO:0019658	glucose catabolic process to lactate and acetate	1	AT1G74030
GO:0009744	response to sucrose stimulus	1	AT1G31930,AT3G49620
GO:0048544	recognition or rejection of self pollen	1	AT1G61360
GO:0050691	regulation of defense response to virus by host	1	AT4G31800
GO:0003674	molecular_function	1	AT1G65690,AT3G43250,AT2G18690,AT5G62770,AT5G64890,AT5G53110,AT3G05500,AT3G22060,AT4G26060,AT4G19370,AT5G48530,AT2G25735,AT5G13320,AT5G64905,AT4G23010,AT1G22900,AT4G24110,AT5G44990,AT1G52200,AT4G25350,AT2G39210,AT1G18380,AT3G18250,AT1G19610,AT4G23610,AT2G36330,AT2G45210,AT3G25130,AT3G46280,AT5G46230,AT5G05190,AT1G63530,AT5G12340,AT4G20000,AT1G67810,AT2G22880,AT1G51920,AT2G35980,AT2G39530,AT4G02380…
GO:0051258	protein polymerization	1	AT4G13510
GO:0005740	mitochondrial envelope	1	AT1G32350
GO:0005525	GTP binding	1	AT1G09630,AT4G18430,AT3G21700
GO:0012505	endomembrane system	1	AT1G51890,AT2G18690,AT2G02220,AT5G20050,AT4G20460,AT5G53110,AT5G57480,AT1G21310,AT4G21410,AT3G13790,AT3G22060,AT4G19370,AT2G37710,AT4G36430,AT2G29100,AT1G63840,AT4G04960,AT3G03640,AT5G01560,AT1G17860,AT5G25930,AT1G61360,AT5G46080,AT1G22900,AT2G27920,AT1G26380,AT1G26390,AT1G18380,AT1G51820,AT4G28350,AT5G27420,AT2G23770,AT5G03610,AT1G19610,AT3G16530,AT2G38860,AT1G51800,AT2G43620,AT4G16350,AT1G05700…
GO:0010112	regulation of systemic acquired resistance	1	AT1G02450
GO:0005774	vacuolar membrane	1	AT2G47800
GO:0005217	intracellular ligand-gated ion channel activity	1	AT2G29100,AT5G11210

## Sheet: Truman GO terms Induced
Term	Desc	PCI PVAL	Genes
GO:0006468	protein amino acid phosphorylation	1.22083e-62	AT3G55450,AT1G51890,AT5G20050,AT5G61560,AT1G73080,AT5G58350,AT4G04960,AT5G01560,AT2G30040,AT1G21240,AT1G51820,AT4G28350,AT3G46930,AT4G23290,AT1G28390,AT4G18950,AT1G18890,AT3G59700,AT5G15730,AT4G23300,AT4G25390,AT4G21400,AT5G65600,AT3G13380,AT4G04510,AT1G14370,AT4G04490,AT1G51850,AT5G67080,AT1G66880,AT1G51790,AT1G18390,AT1G51620,AT3G20860,AT5G60280,AT2G02220,AT1G61360,AT5G25930,AT5G46080,AT3G02880…
GO:0006508	proteolysis	6.04513e-21	AT3G02875,AT3G51330,AT4G25110,AT1G44350,AT1G70170,AT1G32960,AT1G16420,AT1G44130,AT5G48430,AT1G32940,AT2G17760,AT1G65240,AT1G24140,AT3G12700,AT3G59080
GO:0004601	peroxidase activity	2.83275e-18	AT5G39580,AT5G05340,AT1G14540,AT4G36430,AT5G64120,AT4G08780,AT5G64100,AT4G08770
GO:0005975	carbohydrate metabolic process	3.68644e-15	AT1G65610,AT5G24090,AT1G80460,AT5G13420,AT4G16260,AT1G80160,AT4G25810,AT1G61820,AT4G30280,AT4G19810
GO:0016301	kinase activity	7.7035e-15	AT3G55450,AT1G51890,AT5G20050,AT5G61560,AT1G73080,AT5G58350,AT4G04960,AT5G01560,AT2G30040,AT1G21240,AT1G51820,AT4G28350,AT3G46930,AT4G23290,AT1G28390,AT4G18950,AT4G33430,AT3G21630,AT5G24430,AT1G18890,AT3G59700,AT2G39660,AT5G15730,AT4G23300,AT4G25390,AT4G21400,AT5G65600,AT2G19190,AT4G04510,AT1G14370,AT4G04490,AT1G51850,AT4G11330,AT5G67080,AT1G51790,AT1G18390,AT5G01540,AT1G51620,AT3G20860,AT5G60280…
GO:0009695	jasmonic acid biosynthetic process	1.6276e-13	AT1G17420,AT1G20510,AT1G19640,AT1G72520,AT3G25780
GO:0007275	multicellular organismal development	3.19384e-13	AT1G52890,AT1G69490,AT3G15500,AT1G02220,AT3G04070,AT5G39610,AT2G43000
GO:0004364	glutathione transferase activity	3.01699e-11	AT1G69930,AT2G29460,AT2G29470,AT1G74590,AT3G09270
GO:0030599	pectinesterase activity	3.74455e-10	AT2G26440,AT2G45220,AT4G02330,AT2G47550,AT3G43270
GO:0016706	oxidoreductase activity, acting on paired donors, with incorporation or reduction of molecular oxygen, 2-oxoglutarate as one donor, and incorporation of one atom each of oxygen into both donors	1.50372e-09	AT2G17720,AT3G13610,AT2G36690,AT3G06300
GO:0009073	aromatic amino acid family biosynthetic process	1.87562e-08	AT4G39980,AT1G48850,AT1G22410
GO:0004091	carboxylesterase activity	3.6535e-08	AT5G45280,AT5G03610,AT3G09410,AT1G53920
GO:0009225	nucleotide-sugar metabolic process	3.69463e-08	AT5G44480,AT4G20460,AT1G30620
GO:0009699	phenylpropanoid biosynthetic process	1.11246e-07	AT3G53260,AT3G24503,AT3G21230,AT4G36220,AT2G30490,AT2G37040
GO:0009809	lignin biosynthetic process	2.85793e-07	AT1G76470,AT5G54160,AT1G80820,AT1G33030,AT4G36220,AT1G67980,AT4G34230,AT5G48930,AT1G09500
GO:0003779	actin binding	3.7372e-07	AT4G30160,AT1G70140,AT5G54650
GO:0003849	3-deoxy-7-phosphoheptulonate synthase activity	4.49257e-07	AT4G39980,AT1G22410
GO:0008083	growth factor activity	5.78749e-07	AT2G22860,AT3G49780
GO:0000162	tryptophan biosynthetic process	5.87732e-07	AT5G05730,AT3G54640,AT2G04400
GO:0019496	serine-isocitrate lyase pathway	5.99634e-07	AT4G26970,AT1G74030
GO:0016567	protein ubiquitination	7.7887e-07	AT2G35930,AT5G61560,AT5G67340
GO:0009908	flower development	8.87099e-07	AT1G19850,AT1G69490,AT1G19180
GO:0004568	chitinase activity	1.52422e-06	AT2G43620,AT3G54420,AT1G02360,AT4G01700,AT3G47540,AT2G43590
GO:0019825	oxygen binding	3.09596e-06	AT5G36220,AT4G37370,AT2G30770,AT3G26830,AT3G48520,AT2G30750,AT4G39950,AT5G67310,AT2G45570,AT4G37430,AT3G26210,AT2G27690,AT5G57220,AT1G13110,AT2G24180
GO:0016847	1-aminocyclopropane-1-carboxylate synthase activity	3.18652e-06	AT1G01480,AT4G11280
GO:0009555	pollen development	4.29258e-06	AT1G63180,AT1G19180
GO:0006812	cation transport	5.25749e-06	AT3G63380,AT3G53720,AT4G30190,AT1G05300,AT1G64170,AT4G23700
GO:0006857	oligopeptide transport	5.79747e-06	AT1G22570,AT5G55930,AT4G27730,AT5G46050,AT4G21680,AT1G65730
GO:0006629	lipid metabolic process	5.87573e-06	AT2G26560,AT5G03610,AT1G53920
GO:0009611	response to wounding	6.21346e-06	AT3G61190,AT4G39980,AT1G17420,AT3G13790,AT2G38870,AT1G27730,AT5G05730,AT1G19640,AT1G71697,AT1G76930,AT3G11480,AT5G59820,AT5G50200,AT3G53260,AT1G74020,AT2G02220,AT1G51680,AT4G11280,AT1G72520,AT2G30490,AT2G37040,AT3G21240,AT5G20230,AT5G43580
GO:0009887	organ morphogenesis	6.77134e-06	AT2G22860,AT3G49780
GO:0004722	protein serine/threonine phosphatase activity	1.29177e-05	AT1G07630,AT2G16430,AT2G28890,AT4G33920
GO:0005199	structural constituent of cell wall	1.38386e-05	AT1G21310,AT1G76930
GO:0016298	lipase activity	1.48659e-05	AT2G26560,AT1G53920
GO:0004707	MAP kinase activity	1.5831e-05	AT4G11330,AT1G01560
GO:0010150	leaf senescence	1.64243e-05	AT2G38860,AT1G69490
GO:0004721	phosphoprotein phosphatase activity	1.90355e-05	AT1G05000,AT3G02800
GO:0009790	embryonic development	3.10249e-05	AT1G19850,AT4G02380
GO:0006612	protein targeting to membrane	3.39328e-05	AT3G52400,AT3G11820
GO:0007568	aging	6.44281e-05	AT3G49620,AT2G23810
GO:0048527	lateral root development	6.54547e-05	AT5G13080,AT1G08090
GO:0008289	lipid binding	0.000153116	AT4G12470,AT3G18280,AT3G22620,AT4G12490,AT4G12480,AT3G22600,AT4G12500,AT4G22470
GO:0009399	nitrogen fixation	0.000223314	AT3G53180
GO:0017017	MAP kinase tyrosine/serine/threonine phosphatase activity	0.000265041	AT3G55270
GO:0016710	trans-cinnamate 4-monooxygenase activity	0.000265322	AT2G30490
GO:0008061	chitin binding	0.000267165	AT3G04720
GO:0030246	carbohydrate binding	0.000267271	AT4G28350,AT1G65390,AT3G16530,AT2G02230,AT1G61360,AT1G61420,AT5G45090,AT1G61380,AT1G61370
GO:0010298	dihydrocamalexic acid decarboxylase activity	0.000275634	AT3G26830
GO:0047720	indoleacetaldoxime dehydratase activity	0.000275938	AT2G30770
GO:0005201	extracellular matrix structural constituent	0.000298775	AT3G07390
GO:0006355	regulation of transcription, DNA-dependent	0.000300689	AT1G66230,AT5G13080,AT2G38470,AT1G43160,AT1G18570,AT4G01720,AT4G18430,AT1G80840,AT4G31550,AT1G68840,AT5G49520,AT4G22070,AT5G46350,AT3G50260,AT5G22570,AT4G05100,AT2G30250,AT4G17500,AT3G01970,AT1G18860,AT2G22850,AT3G23250,AT5G24110,AT4G01250,AT1G68150,AT5G45750,AT4G18170,AT2G23320,AT5G13330,AT4G23810,AT3G15060,AT5G07100,AT2G24570,AT1G62300
GO:0006569	tryptophan catabolic process	0.000445236	AT4G39950
GO:0051410	detoxification of nitrogen compound	0.000445931	AT5G22300
GO:0006751	glutathione catabolic process	0.000446329	AT4G39640
GO:0019499	cyanide metabolic process	0.000447027	AT5G22300
GO:0046482	para-aminobenzoic acid metabolic process	0.000447127	AT2G43820
GO:0009823	cytokinin catabolic process	0.000447127	AT1G75450
GO:0016655	oxidoreductase activity, acting on NADH or NADPH, quinone or similar compound as acceptor	0.000533476	AT5G54500
GO:0015036	disulfide oxidoreductase activity	0.000533476	AT4G05020
GO:0010211	IAA-Leu conjugate hydrolase activity	0.000535475	AT3G02875
GO:0010210	IAA-Phe conjugate hydrolase activity	0.000535475	AT3G02875
GO:0010178	IAA-amino acid conjugate hydrolase activity	0.000535619	AT1G44350
GO:0050661	NADP binding	0.000541712	AT3G06350
GO:0004425	indole-3-glycerol-phosphate synthase activity	0.000551268	AT2G04400
GO:0046423	allene-oxide cyclase activity	0.000553403	AT3G25780
GO:0004049	anthranilate synthase activity	0.000827586	AT5G05730
GO:0010325	raffinose family oligosaccharide biosynthetic process	0.000845309	AT3G63010
GO:0000723	telomere maintenance	0.00089067	AT5G13820
GO:0016652	oxidoreductase activity, acting on NADH or NADPH, NAD or NADP as acceptor	0.00106638	AT5G11670
GO:0009793	embryonic development ending in seed dormancy	0.00109312	AT1G48850,AT3G06350,AT2G46140
GO:0009086	methionine biosynthetic process	0.00111161	AT3G25900
GO:0050832	defense response to fungus	0.00137486	AT4G12470,AT3G52400,AT2G38870,AT2G38470,AT2G30770,AT4G33430,AT4G12490,AT2G39660,AT4G12480,AT5G39580,AT1G80840,AT3G11820,AT1G19250,AT5G64120,AT2G40140
GO:0004462	lactoylglutathione lyase activity	0.00137741	AT1G80160
GO:0010262	somatic embryogenesis	0.00141309	AT3G54420
GO:0009055	electron carrier activity	0.00151201	AT1G26380,AT4G20830,AT1G26390,AT1G30700,AT1G26420,AT1G26410,AT4G20860,AT5G44380,AT5G44390
GO:0008559	xenobiotic-transporting ATPase activity	0.001693	AT2G47000
GO:0010015	root morphogenesis	0.00173827	AT1G31930
GO:0004888	transmembrane receptor activity	0.00174112	AT5G45000,AT5G44910,AT1G52900,AT4G11170,AT1G66090,AT1G57630,AT5G46520,AT4G09420
GO:0009698	phenylpropanoid metabolic process	0.00188956	AT1G20510,AT1G51680,AT3G21240
GO:0009932	cell tip growth	0.00195265	AT1G70140
GO:0051015	actin filament binding	0.00196335	AT1G70140
GO:0009451	RNA modification	0.002	AT5G22250
GO:0016656	monodehydroascorbate reductase (NADH) activity	0.00213078	AT3G09940
GO:0016791	phosphatase activity	0.00213106	AT1G73010
GO:0048444	floral organ morphogenesis	0.00222993	AT3G63010
GO:0009561	megagametogenesis	0.00223602	AT4G34200
GO:0003700	transcription factor activity	0.00224471	AT1G66230,AT5G13080,AT1G27730,AT2G38470,AT1G43160,AT1G18570,AT1G19850,AT4G01720,AT5G59820,AT1G80840,AT1G52890,AT2G47190,AT2G38250,AT4G31550,AT1G69490,AT1G68840,AT1G34370,AT5G49520,AT1G10585,AT4G22070,AT3G15500,AT1G02220,AT5G46350,AT3G50260,AT5G22570,AT2G37430,AT4G05100,AT2G30250,AT3G04070,AT5G39610,AT4G17500,AT3G01970,AT1G18860,AT2G22850,AT3G23250,AT5G04340,AT5G24110,AT4G01250,AT2G40140,AT3G55980…
GO:0019253	reductive pentose-phosphate cycle	0.00232313	AT2G45290
GO:0045431	flavonol synthase activity	0.00264901	AT3G19010
GO:0005516	calmodulin binding	0.00266196	AT3G63380,AT2G39200,AT2G47190,AT4G31550,AT2G15760,AT1G61560,AT4G37640,AT3G45290,AT4G33050,AT2G23320,AT2G24570,AT5G26920
GO:0006790	sulfur metabolic process	0.00268037	AT5G63990
GO:0016740	transferase activity	0.00274573	AT1G28680,AT2G28110,AT5G39050,AT3G09020,AT5G42830,AT5G01210,AT5G48930
GO:0008113	peptide-methionine-(S)-S-oxide reductase activity	0.0029201	AT4G04800
GO:0051287	NAD binding	0.00297458	AT4G34200
GO:0015035	protein disulfide oxidoreductase activity	0.00372439	AT5G38900
GO:0045543	gibberellin 2-beta-dioxygenase activity	0.00397035	AT1G02400
GO:0006520	amino acid metabolic process	0.00401338	AT5G07440
GO:0030163	protein catabolic process	0.00489433	AT2G41110
GO:0004518	nuclease activity	0.00504916	AT5G61780
GO:0010302	2-oxoglutarate-dependent dioxygenase activity	0.00528959	AT1G06620
GO:0006869	lipid transport	0.00603696	AT4G12470,AT3G18280,AT3G22620,AT4G12490,AT4G12480,AT3G22600,AT4G12500,AT4G22470
GO:0010386	lateral root primordium development	0.00611694	AT5G05730
GO:0005886	plasma membrane	0.00627799	AT3G52400,AT4G17615,AT3G55740,AT4G20830,AT1G21240,AT4G33430,AT3G21630,AT2G39660,AT4G32650,AT2G39200,AT4G30190,AT3G11820,AT4G14630,AT2G23810,AT2G47000,AT3G02880,AT1G15520,AT3G25780,AT3G07390,AT4G25900,AT3G18830,AT1G61560,AT3G45290,AT1G74790,AT5G06320
GO:0004540	ribonuclease activity	0.00634835	AT5G22250
GO:0004497	monooxygenase activity	0.00658278	AT3G26830,AT1G19250,AT4G36220,AT4G38540
GO:0006952	defense response	0.00677562	AT1G17420,AT5G64905,AT5G45000,AT1G65390,AT5G44910,AT5G05440,AT2G39200,AT3G11480,AT5G51060,AT3G53260,AT2G43520,AT1G52900,AT3G11820,AT4G11170,AT5G44420,AT1G57650,AT5G13320,AT1G22900,AT1G66090,AT1G72520,AT5G45090,AT1G57630,AT2G37040,AT4G04220,AT1G61560,AT3G45290,AT3G05360,AT5G46520,AT4G09420,AT2G32660,AT4G23280
GO:0004437	inositol or phosphatidylinositol phosphatase activity	0.00742211	AT5G63990
GO:0006350	transcription	0.00818765	AT5G05140
GO:0015979	photosynthesis	0.00821857	AT1G27730
GO:0006633	fatty acid biosynthetic process	0.00837989	AT1G64400
GO:0046983	protein dimerization activity	0.00864679	AT1G63180,AT1G21120,AT1G21100
GO:0006909	phagocytosis	0.0104895	AT3G60260
GO:0003993	acid phosphatase activity	0.0105749	AT2G16430
GO:0009643	photosynthetic acclimation	0.010989	AT5G59820
GO:0008194	UDP-glycosyltransferase activity	0.0110687	AT3G50740,AT1G22400,AT3G46690,AT3G11340,AT2G43820,AT3G46660,AT3G53150
GO:0006979	response to oxidative stress	0.0115076	AT1G27730,AT2G40000,AT1G52200,AT4G20830,AT5G59820,AT5G05340,AT3G53260,AT4G39640,AT1G14540,AT1G13340,AT1G72060,AT1G19020,AT4G23190,AT2G37040,AT4G08780,AT5G44380,AT5G20230,AT4G02380,AT5G64100,AT4G08770,AT1G78410
GO:0008152	metabolic process	0.0131834	AT3G63380,AT1G55450,AT4G26970,AT5G07440,AT1G22400,AT3G46690,AT2G41380,AT4G39230,AT1G06520,AT5G13420,AT5G24760,AT4G30190,AT3G11340,AT5G59490,AT3G25610,AT5G44240,AT4G22530,AT5G16080,AT1G73010,AT1G68620,AT3G46660,AT3G53150,AT3G54150,AT2G45290,AT5G06570,AT1G08940,AT4G38540
GO:0005451	monovalent cation:proton antiporter activity	0.013986	AT3G53720,AT1G64170,AT4G23700
GO:0010476	gibberellin-mediated signaling	0.0166667	AT3G63010
GO:0009863	salicylic acid mediated signaling pathway	0.016781	AT3G52400,AT3G11820,AT5G13320,AT1G28480
GO:0004723	calcium-dependent protein serine/threonine phosphatase activity	0.01848	AT5G24430
GO:0009867	jasmonic acid mediated signaling pathway	0.0201279	AT3G52400,AT1G19640,AT3G11820,AT3G15500,AT1G28480,AT1G19180
GO:0015112	nitrate transmembrane transporter activity	0.020979	AT5G50200,AT1G08090,AT1G12940,AT3G45060
GO:0045010	actin nucleation	0.0213371	AT1G70140,AT5G54650
GO:0006839	mitochondrial transport	0.0219216	AT5G27520,AT4G24570
GO:0043620	regulation of transcription in response to stress	0.0240964	AT5G13080
GO:0048046	apoplast	0.0249372	AT4G39640,AT1G32960,AT4G25810,AT1G32940,AT1G09560,AT4G30280
GO:0020037	heme binding	0.0263802	AT3G48890
GO:0006623	protein targeting to vacuole	0.0278422	AT1G30900
GO:0015690	aluminum ion transport	0.0286624	AT5G20230
GO:0040007	growth	0.0325513	AT1G17420,AT1G72520
GO:0005506	iron ion binding	0.0329724	AT1G17420,AT5G05600,AT3G55970,AT1G72520,AT2G38240
GO:0045735	nutrient reservoir activity	0.0352224	AT2G26560,AT4G14630,AT1G09560
GO:0015020	glucuronosyltransferase activity	0.0354273	AT2G28110,AT1G22400
GO:0015802	basic amino acid transport	0.0364372	AT4G21120,AT1G77380
GO:0010421	hydrogen peroxide-mediated programmed cell death	0.037037	AT3G13610
GO:0035264	multicellular organism growth	0.037037	AT1G27730
GO:0005576	extracellular region	0.0388611	AT1G75450,AT2G43520,AT4G14630,AT4G07820,AT3G07390
GO:0045730	respiratory burst	0.0389698	AT5G64120
GO:0015145	monosaccharide transmembrane transporter activity	0.0392157	AT3G18830
GO:0004675	transmembrane receptor protein serine/threonine kinase activity	0.0396805	AT4G18250,AT4G21380
GO:0005522	profilin binding	0.0404396	AT1G70140
GO:0008987	quinolinate synthetase A activity	0.0429482	AT5G50210
GO:0046424	ferulate 5-hydroxylase activity	0.0435591	AT4G36220
GO:0007186	G-protein coupled receptor protein signaling pathway	0.044586	AT1G31930
GO:0009267	cellular response to starvation	0.0447761	AT3G49620
GO:0008171	O-methyltransferase activity	0.0471162	AT1G21120,AT5G54160,AT1G33030,AT1G21100
GO:0051245	negative regulation of cellular defense response	0.047619	AT3G52400,AT3G11820
GO:0032491	detection of molecule of fungal origin	0.047619	AT3G21630
GO:0005313	L-glutamate transmembrane transporter activity	0.0526316	AT4G21120
GO:0004743	pyruvate kinase activity	0.0557655	AT5G63680,AT5G56350
GO:0004370	glycerol kinase activity	0.0566082	AT1G80460
GO:0001653	peptide receptor activity	0.0571429	AT2G02220
GO:0004564	beta-fructofuranosidase activity	0.0577052	AT3G13790,AT3G06500
GO:0006888	ER to Golgi vesicle-mediated transport	0.06	AT3G52190
GO:0009646	response to absence of light	0.0625	AT5G20230
GO:0030041	actin filament polymerization	0.0697674	AT5G54650
GO:0005529	sugar binding	0.0701013	AT5G03700,AT4G21390
GO:0006874	cellular calcium ion homeostasis	0.0706522	AT2G29100,AT5G11210,AT5G48410,AT2G29110,AT5G48400
GO:0042742	defense response to bacterium	0.0723583	AT2G38470,AT2G30770,AT1G80460,AT4G33430,AT1G80840,AT2G19190,AT4G31550,AT1G19250,AT4G23210,AT5G13320,AT5G06320,AT2G24570,AT1G19180
GO:0015189	L-lysine transmembrane transporter activity	0.0731707	AT4G21120
GO:0015181	arginine transmembrane transporter activity	0.0731707	AT4G21120
GO:0015824	proline transport	0.0789474	AT3G55740
GO:0015193	L-proline transmembrane transporter activity	0.0833333	AT3G55740
GO:0010107	potassium ion import	0.0854223	AT4G17615
GO:0047209	coniferyl-alcohol glucosyltransferase activity	0.0868033	AT3G50740
GO:0009694	jasmonic acid metabolic process	0.0909091	AT1G19640
GO:0016049	cell growth	0.0932467	AT2G44080,AT4G33430
GO:0009617	response to bacterium	0.0939147	AT4G39980,AT2G30770,AT1G80460,AT5G05730,AT3G26830,AT3G28930,AT2G30750,AT4G39950,AT4G37990,AT5G06320
GO:0010225	response to UV-C	0.105769	AT3G55270
GO:0043090	amino acid import	0.108108	AT5G40780
GO:0019199	transmembrane receptor protein kinase activity	0.109009	AT3G21630
GO:0009679	hexose:hydrogen symporter activity	0.109091	AT5G26340
GO:0004020	adenylylsulfate kinase activity	0.109603	AT4G39940
GO:0015692	lead ion transport	0.109983	AT1G15520
GO:0019595	non-phosphorylated glucose catabolic process	0.111111	AT1G74030
GO:0016798	hydrolase activity, acting on glycosyl bonds	0.111434	AT5G15870,AT4G25810,AT4G30280
GO:0010204	defense response signaling pathway, resistance gene-independent	0.111833	AT1G19250,AT3G05360
GO:0019748	secondary metabolic process	0.112388	AT3G13610
GO:0009808	lignin metabolic process	0.114523	AT3G50740
GO:0051555	flavonol biosynthetic process	0.118358	AT5G54160
GO:0009435	NAD biosynthetic process	0.12	AT5G50210
GO:0051861	glycolipid binding	0.126924	AT4G39670
GO:0005543	phospholipid binding	0.126924	AT3G61190
GO:0035252	UDP-xylosyltransferase activity	0.12729	AT5G33290
GO:0009058	biosynthetic process	0.127474	AT1G74000,AT4G19460,AT2G35710,AT2G36690,AT1G74010
GO:0004566	beta-glucuronidase activity	0.127828	AT5G34940
GO:0002229	defense response to oomycetes	0.134921	AT4G33430
GO:0004930	G-protein coupled receptor activity	0.138286	AT3G26090
GO:0035265	organ growth	0.14007	AT2G44080
GO:0004553	hydrolase activity, hydrolyzing O-glycosyl compounds	0.148006	AT3G13790,AT1G65610,AT5G24090,AT4G16260,AT1G61820,AT4G19810
GO:0046777	protein amino acid autophosphorylation	0.151006	AT2G39660
GO:0005057	receptor signaling protein activity	0.155102	AT3G21630
GO:0005242	inward rectifier potassium channel activity	0.155172	AT4G32650
GO:0048037	cofactor binding	0.158701	AT4G34200
GO:0015238	drug transporter activity	0.159332	AT5G52050
GO:0004103	choline kinase activity	0.160357	AT1G71697
GO:0016772	transferase activity, transferring phosphorus-containing groups	0.165912	AT4G39940
GO:0035251	UDP-glucosyltransferase activity	0.166112	AT2G43820
GO:0019563	glycerol catabolic process	0.166667	AT1G80460
GO:0009268	response to pH	0.166667	AT2G30360
GO:0015914	phospholipid transport	0.176016	AT3G25610,AT5G44240
GO:0030795	jasmonate O-methyltransferase activity	0.176471	AT1G19640
GO:0016246	RNA interference	0.178571	AT5G61780
GO:0009970	cellular response to sulfate starvation	0.181414	AT1G78000
GO:0047763	caffeate O-methyltransferase activity	0.1875	AT5G54160
GO:0016046	detection of fungus	0.191176	AT5G13320
GO:0010200	response to chitin	0.191536	AT2G35930,AT1G27730,AT2G38470,AT3G21630,AT3G16530,AT5G59820,AT1G80840,AT2G37430,AT1G66160,AT2G23320,AT2G24570,AT1G62300
GO:0042409	caffeoyl-CoA O-methyltransferase activity	0.192982	AT1G67980
GO:0010117	photoprotection	0.193054	AT1G27730
GO:0015085	calcium ion transmembrane transporter activity	0.194737	AT4G37640
GO:0047558	3-cyanoalanine hydratase activity	0.2	AT5G22300
GO:0031201	SNARE complex	0.2	AT3G11820
GO:0018822	nitrile hydratase activity	0.2	AT5G22300
GO:0003855	3-dehydroquinate dehydratase activity	0.2	AT3G06350
GO:0008417	fucosyltransferase activity	0.201182	AT2G15390
GO:0009742	brassinosteroid mediated signaling	0.206349	AT2G44080,AT4G33430
GO:0010540	basipetal auxin transport	0.206349	AT2G47000
GO:0019200	carbohydrate kinase activity	0.207944	AT1G80460
GO:0005484	SNAP receptor activity	0.20803	AT3G52400,AT3G11820
GO:0007264	small GTPase mediated signal transduction	0.208412	AT1G09630,AT4G18430,AT3G21700,AT4G39890,AT5G45750,AT3G15060
GO:0008643	carbohydrate transport	0.220553	AT1G08920,AT3G18830,AT4G36670
GO:0030001	metal ion transport	0.231547	AT2G35730,AT2G36950
GO:0046836	glycolipid transport	0.234968	AT4G39670
GO:0009644	response to high light intensity	0.235294	AT1G27730
GO:0046982	protein heterodimerization activity	0.241452	AT4G33430,AT5G39610
GO:0009414	response to water deprivation	0.247793	AT2G35930,AT1G27730,AT4G17615,AT1G52890,AT2G47190,AT3G15500,AT3G26090,AT1G53310
GO:0005887	integral to plasma membrane	0.249533	AT1G30900,AT5G51060
GO:0019643	reductive tricarboxylic acid cycle	0.25	AT4G26970
GO:0018456	aryl-alcohol dehydrogenase activity	0.25	AT4G37990
GO:0004764	shikimate 5-dehydrogenase activity	0.25	AT3G06350
GO:0046029	mannitol dehydrogenase activity	0.25	AT4G37990
GO:0032442	phenylcoumaran benzylic ether reductase activity	0.25	AT4G39230
GO:0016787	hydrolase activity	0.253485	AT5G59490,AT5G16080,AT1G68620,AT3G63010,AT5G06570,AT4G29700,AT2G39400
GO:0005388	calcium-transporting ATPase activity	0.258567	AT3G63380,AT4G37640
GO:0016758	transferase activity, transferring hexosyl groups	0.26781	AT1G22400,AT2G35710,AT2G43820
GO:0010053	root epidermal cell differentiation	0.269231	AT5G51060
GO:0045551	cinnamyl-alcohol dehydrogenase activity	0.278788	AT4G34230,AT1G09500
GO:0019642	anaerobic glycolysis	0.281155	AT1G74030
GO:0006816	calcium ion transport	0.285056	AT3G63380
GO:0010447	response to acidity	0.285714	AT1G34370
GO:0002237	response to molecule of bacterial origin	0.287023	AT1G80460,AT4G23210
GO:0001666	response to hypoxia	0.29359	AT5G27760
GO:0004473	malate dehydrogenase (oxaloacetate-decarboxylating) (NADP+) activity	0.298246	AT5G11670
GO:0042631	cellular response to water deprivation	0.301269	AT4G02380
GO:0016564	transcription repressor activity	0.305241	AT1G27730,AT5G67450
GO:0004683	calmodulin-dependent protein kinase activity	0.311009	AT1G18890,AT3G20410
GO:0030007	cellular potassium ion homeostasis	0.3125	AT3G53720
GO:0009626	plant-type hypersensitive response	0.31616	AT2G26560,AT3G54420,AT4G37990,AT1G19250,AT4G23210
GO:0000159	protein phosphatase type 2A complex	0.318182	AT3G26020
GO:0000325	plant-type vacuole	0.32	AT4G14630
GO:0016563	transcription activator activity	0.32515	AT2G47190,AT4G17500,AT4G23810
GO:0015385	sodium:hydrogen antiporter activity	0.330827	AT3G53720,AT1G64170,AT4G23700
GO:0004470	malic enzyme activity	0.333333	AT5G11670
GO:0050269	coniferyl-aldehyde dehydrogenase activity	0.333333	AT3G24503
GO:0009759	indole glucosinolate biosynthetic process	0.333333	AT1G18570
GO:0010555	response to mannitol stimulus	0.333333	AT1G31930
GO:0019517	threonine catabolic process to D-lactate	0.333333	AT4G26970
GO:0009851	auxin biosynthetic process	0.333333	AT5G05730,AT5G20960
GO:0016036	cellular response to phosphate starvation	0.334237	AT3G52190
GO:0009630	gravitropism	0.337662	AT1G31930,AT2G47000
GO:0004674	protein serine/threonine kinase activity	0.344185	AT1G73080,AT1G21240,AT4G33430,AT1G66880,AT2G02220,AT3G02880,AT4G39270,AT1G74360
GO:0005950	anthranilate synthase complex	0.345455	AT5G05730
GO:0000015	phosphopyruvate hydratase complex	0.345455	AT1G74030
GO:0009620	response to fungus	0.356818	AT2G39660,AT3G11820,AT1G51680,AT3G21240
GO:0005743	mitochondrial inner membrane	0.358836	AT3G48850,AT5G27520,AT4G24570,AT5G13490
GO:0017089	glycolipid transporter activity	0.375	AT4G39670
GO:0042538	hyperosmotic salinity response	0.375902	AT5G59820,AT5G67450
GO:0019692	deoxyribose phosphate metabolic process	0.377778	AT2G45290
GO:0009409	response to cold	0.379937	AT3G61190,AT1G27730,AT4G17615,AT5G59820,AT1G80820,AT2G40140,AT5G67450,AT1G09560,AT4G02380
GO:0009651	response to salt stress	0.392181	AT1G27730,AT4G17615,AT1G18570,AT2G47190,AT3G55270,AT4G05100,AT3G23250
GO:0051607	defense response to virus	0.395231	AT2G35980,AT5G06320
GO:0009723	response to ethylene stimulus	0.396917	AT1G31930,AT1G18570,AT5G05730,AT2G47190,AT4G05100,AT5G44420,AT4G11280,AT3G23250,AT1G15520,AT5G25350,AT3G04720
GO:0010181	FMN binding	0.402079	AT5G54500
GO:0009825	multidimensional cell growth	0.413135	AT1G69490
GO:0009813	flavonoid biosynthetic process	0.419485	AT3G19010
GO:0015031	protein transport	0.419661	AT1G09630,AT4G18430,AT3G10640,AT4G39890,AT5G45750,AT3G15060
GO:0008553	hydrogen-exporting ATPase activity, phosphorylative mechanism	0.422085	AT4G30190
GO:0003994	aconitate hydratase activity	0.428571	AT4G26970
GO:0004385	guanylate kinase activity	0.428571	AT3G57550
GO:0004634	phosphopyruvate hydratase activity	0.428571	AT1G74030
GO:0010044	response to aluminum ion	0.428571	AT1G34370
GO:0004834	tryptophan synthase activity	0.428571	AT3G54640
GO:0008898	homocysteine S-methyltransferase activity	0.434645	AT3G25900
GO:0009834	plant-type secondary cell wall biogenesis	0.436165	AT2G28110
GO:0009737	response to abscisic acid stimulus	0.441651	AT3G22060,AT1G27730,AT1G31930,AT1G18570,AT5G27420,AT3G26830,AT1G76930,AT3G28210,AT2G47190,AT3G11820,AT5G01540,AT4G05100,AT4G21410,AT3G26090,AT1G01560
GO:0008757	S-adenosylmethionine-dependent methyltransferase activity	0.445153	AT3G11480,AT5G38780
GO:0019564	aerobic glycerol catabolic process	0.45	AT1G74030
GO:0004867	serine-type endopeptidase inhibitor activity	0.452381	AT2G38870,AT1G72060,AT5G43580
GO:0051707	response to other organism	0.459381	AT3G11480,AT2G35980,AT3G51660,AT1G19250,AT4G36430,AT3G02840
GO:0009652	thigmotropism	0.464706	AT1G31930
GO:0045941	positive regulation of transcription	0.469423	AT4G23810
GO:0030145	manganese ion binding	0.470113	AT4G14630,AT1G09560
GO:0009411	response to UV	0.482545	AT1G51680,AT3G21240
GO:0009816	defense response to bacterium, incompatible interaction	0.483607	AT2G40000,AT5G13320,AT4G23190,AT4G23810
GO:0000304	response to singlet oxygen	0.490958	AT1G61120
GO:0009738	abscisic acid mediated signaling	0.498059	AT4G17615,AT1G18890
GO:0009741	response to brassinosteroid stimulus	0.5	AT2G44080
GO:0019567	arabinose biosynthetic process	0.5	AT1G30620
GO:0010188	response to microbial phytotoxin	0.5	AT1G80460
GO:0010363	regulation of plant-type hypersensitive response	0.5	AT3G52400,AT3G11820
GO:0045548	phenylalanine ammonia-lyase activity	0.5	AT3G53260,AT2G37040
GO:0004866	endopeptidase inhibitor activity	0.5	AT1G17860
GO:0009060	aerobic respiration	0.5	AT5G51060
GO:0047427	cyanoalanine nitrilase activity	0.5	AT5G22300
GO:0016491	oxidoreductase activity	0.503329	AT5G07440,AT3G49620,AT5G24760,AT5G05600,AT4G39830,AT3G55970,AT2G38240
GO:0009507	chloroplast	0.507355	AT3G55450,AT3G14050,AT4G39980,AT1G17420,AT1G48850,AT1G52200,AT1G65390,AT1G18890,AT5G05730,AT5G24760,AT3G22160,AT1G20310,AT4G39950,AT2G35980,AT1G14370,AT1G49000,AT1G10700,AT2G15760,AT1G68840,AT1G74030,AT3G54640,AT1G05340,AT5G55530,AT3G06350,AT1G10410,AT5G44290,AT1G66090,AT1G72520,AT2G27660,AT2G04400,AT5G50210,AT3G44720,AT2G45290,AT1G80450,AT1G67810,AT2G22880,AT1G61800,AT5G02020,AT1G22410,AT5G03320
GO:0006954	inflammatory response	0.519578	AT3G51660
GO:0042545	cell wall modification	0.52987	AT2G26440,AT2G45220,AT2G47550,AT3G43270
GO:0009165	nucleotide biosynthetic process	0.530444	AT1G10700
GO:0030244	cellulose biosynthetic process	0.53125	AT1G71100
GO:0009817	defense response to fungus, incompatible interaction	0.535369	AT3G21630,AT2G39200,AT1G61560
GO:0017119	Golgi transport complex	0.538462	AT1G30900
GO:0016757	transferase activity, transferring glycosyl groups	0.540428	AT3G50740,AT1G22400,AT3G46690,AT4G19460,AT3G09020,AT2G35710,AT2G15390,AT2G43820,AT3G46660
GO:0010305	leaf vascular tissue pattern formation	0.541667	AT1G19850
GO:0009870	defense response signaling pathway, resistance gene-dependent	0.543318	AT1G19250
GO:0009733	response to auxin stimulus	0.547072	AT5G54500,AT4G36110,AT1G18570,AT1G19850,AT2G47000,AT5G13320,AT4G11280,AT3G23250,AT3G07390,AT2G45210,AT5G50760
GO:0000302	response to reactive oxygen species	0.550196	AT4G02380
GO:0009416	response to light stimulus	0.550441	AT2G29100,AT5G11210,AT3G49620,AT5G48410,AT5G59820,AT2G29110,AT2G30490,AT5G48400
GO:0010120	camalexin biosynthetic process	0.555556	AT2G38470,AT2G30770,AT3G26830,AT4G39950
GO:0009631	cold acclimation	0.557521	AT5G59820
GO:0009306	protein secretion	0.565934	AT4G12120
GO:0004712	protein serine/threonine/tyrosine kinase activity	0.574036	AT3G46930,AT4G18950
GO:0030551	cyclic nucleotide binding	0.575251	AT4G32650
GO:0003676	nucleic acid binding	0.583711	AT1G27730,AT5G59820,AT1G34370,AT2G37430,AT5G61780,AT5G04340,AT5G67450,AT2G28710,AT4G17720
GO:0002213	defense response to insect	0.590253	AT1G61120
GO:0004664	prephenate dehydratase activity	0.6	AT3G44720
GO:0047769	arogenate dehydratase activity	0.6	AT3G44720
GO:0009269	response to desiccation	0.606451	AT2G46140
GO:0015116	sulfate transmembrane transporter activity	0.611111	AT1G78000
GO:0015326	cationic amino acid transmembrane transporter activity	0.612536	AT4G21120
GO:0003979	UDP-glucose 6-dehydrogenase activity	0.618182	AT5G15490
GO:0006096	glycolysis	0.6231	AT1G74030,AT5G63680,AT5G56350
GO:0009735	response to cytokinin stimulus	0.62753	AT2G47000,AT1G03850
GO:0006813	potassium ion transport	0.62961	AT1G70300
GO:0003824	catalytic activity	0.634364	AT3G14050,AT5G24760,AT5G44480,AT4G34200,AT4G20460,AT1G30620,AT3G06350,AT5G33290,AT2G39420,AT1G64400,AT1G74790,AT1G08940
GO:0004672	protein kinase activity	0.636585	AT5G58350,AT1G18890,AT3G13380,AT4G23190,AT2G30360,AT4G21390
GO:0004617	phosphoglycerate dehydrogenase activity	0.642857	AT4G34200
GO:0017111	nucleoside-triphosphatase activity	0.657416	AT4G11170,AT1G66090,AT5G46520
GO:0042803	protein homodimerization activity	0.662816	AT5G39610
GO:0009861	jasmonic acid and ethylene-dependent systemic resistance	0.664563	AT5G44420
GO:0006537	glutamate biosynthetic process	0.666667	AT5G38710
GO:0006562	proline catabolic process	0.666667	AT5G38710
GO:0043069	negative regulation of programmed cell death	0.666667	AT3G52400,AT3G11820
GO:0009627	systemic acquired resistance	0.670001	AT1G19250,AT3G04720
GO:0006098	pentose-phosphate shunt	0.68	AT5G13420
GO:0016621	cinnamoyl-CoA reductase activity	0.681818	AT1G76470,AT1G80820
GO:0009266	response to temperature stimulus	0.6875	AT3G61190
GO:0042546	cell wall biogenesis	0.7	AT2G15390
GO:0010017	red or far red light signaling pathway	0.701728	AT4G25350
GO:0004356	glutamate-ammonia ligase activity	0.714286	AT5G37600,AT3G53180
GO:0009625	response to insect	0.721509	AT5G44420
GO:0015198	oligopeptide transporter activity	0.727273	AT5G55930,AT4G27730,AT1G65730
GO:0004345	glucose-6-phosphate dehydrogenase activity	0.730769	AT5G40760
GO:0004022	alcohol dehydrogenase activity	0.730769	AT1G09500
GO:0019303	D-ribose catabolic process	0.730769	AT2G45290
GO:0009408	response to heat	0.739267	AT3G61190,AT5G59820
GO:0000151	ubiquitin ligase complex	0.741115	AT5G61560,AT5G67340,AT1G66160,AT5G09800,AT5G64660
GO:0009061	anaerobic respiration	0.742857	AT4G26970,AT1G74030
GO:0048235	pollen sperm cell differentiation	0.743083	AT1G06520
GO:0009753	response to jasmonic acid stimulus	0.743785	AT5G13220,AT1G61120,AT1G18570,AT3G09940,AT1G76930,AT4G05100,AT1G74020,AT5G44420,AT4G11280,AT3G23250,AT1G15520,AT1G17380,AT1G19180
GO:0046914	transition metal ion binding	0.746791	AT3G48890
GO:0004029	aldehyde dehydrogenase (NAD) activity	0.75	AT3G24503
GO:0009916	alternative oxidase activity	0.75	AT1G32350
GO:0009664	plant-type cell wall organization and biogenesis	0.75	AT1G21310
GO:0005488	binding	0.756167	AT5G24760,AT3G48850,AT2G03410,AT5G67340,AT5G27520,AT4G34200,AT3G06350,AT4G24570,AT4G36030,AT1G66160,AT5G09800,AT5G13490,AT3G02840,AT5G64660
GO:0015079	potassium ion transmembrane transporter activity	0.757143	AT1G70300
GO:0006094	gluconeogenesis	0.764706	AT1G74030
GO:0005986	sucrose biosynthetic process	0.764706	AT5G51830
GO:0000145	exocyst	0.765568	AT2G39380,AT3G55150
GO:0016051	carbohydrate biosynthetic process	0.767588	AT2G35710
GO:0004033	aldo-keto reductase activity	0.769231	AT1G60730
GO:0009814	defense response, incompatible interaction	0.778134	AT5G64890
GO:0031348	negative regulation of defense response	0.783282	AT3G61190,AT3G11820
GO:0015171	amino acid transmembrane transporter activity	0.787302	AT3G55740,AT4G35180,AT1G77380,AT5G40780
GO:0007165	signal transduction	0.790568	AT2G25470,AT3G26020,AT1G33600,AT4G11330,AT5G42010,AT4G04220,AT3G20410,AT3G05360,AT1G64610,AT1G01560,AT2G32660
GO:0009751	response to salicylic acid stimulus	0.791476	AT3G61190,AT2G40000,AT1G18570,AT1G76930,AT1G80840,AT2G47190,AT1G15520,AT1G28480
GO:0010417	glucuronoxylan biosynthetic process	0.8	AT2G28110
GO:0005768	endosome	0.818182	AT4G33430
GO:0019654	acetate fermentation	0.818182	AT1G74030,AT5G51830
GO:0031225	anchored to membrane	0.822102	AT3G51330,AT2G44790,AT2G22470,AT3G16860,AT3G22600,AT1G70170,AT4G28085,AT3G07390,AT5G20230,AT2G17760,AT1G74790,AT1G65240,AT1G24140
GO:0045087	innate immune response	0.826829	AT1G73080
GO:0006970	response to osmotic stress	0.83149	AT4G17615
GO:0009693	ethylene biosynthetic process	0.833333	AT1G01480,AT4G11280
GO:0009612	response to mechanical stimulus	0.835165	AT4G11280
GO:0000166	nucleotide binding	0.836464	AT1G49450,AT4G11170,AT1G66090,AT3G52190,AT5G46520
GO:0046686	response to cadmium ion	0.841837	AT2G47190,AT3G23250
GO:0007242	intracellular signaling cascade	0.841912	AT2G42060
GO:0004842	ubiquitin-protein ligase activity	0.845961	AT2G35930,AT5G67340,AT2G42360,AT1G66160,AT5G09800,AT5G64660
GO:0005215	transporter activity	0.868266	AT1G22570,AT1G58340,AT3G23550,AT5G46050,AT4G21680
GO:0006904	vesicle docking during exocytosis	0.875	AT2G39380,AT3G55150
GO:0004028	3-chloroallyl aldehyde dehydrogenase activity	0.875	AT3G24503
GO:0009739	response to gibberellin stimulus	0.875	AT1G18570
GO:0009941	chloroplast envelope	0.888889	AT3G08640
GO:0048366	leaf development	0.88897	AT1G07630,AT2G28890
GO:0005783	endoplasmic reticulum	0.896401	AT4G37370,AT3G51440,AT3G02875,AT3G26830,AT4G32650,AT1G19360,AT4G37430,AT4G36220,AT2G30490,AT4G37640,AT3G52190,AT2G24180
GO:0010224	response to UV-B	0.899072	AT4G36220
GO:0010252	auxin homeostasis	0.903846	AT5G48930
GO:0009832	plant-type cell wall biogenesis	0.904762	AT1G30620
GO:0010105	negative regulation of ethylene mediated signaling pathway	0.909091	AT5G25350
GO:0006808	regulation of nitrogen utilization	0.909091	AT4G39230
GO:0005351	sugar:hydrogen symporter activity	0.909091	AT1G08920,AT5G26340,AT3G18830,AT1G16370,AT4G36670
GO:0016887	ATPase activity	0.911643	AT5G57480,AT4G30490,AT4G30190
GO:0009706	chloroplast inner membrane	0.911765	AT3G57280
GO:0009639	response to red or far red light	0.914085	AT1G02400
GO:0009684	indoleacetic acid biosynthetic process	0.916084	AT4G39950
GO:0030304	trypsin inhibitor activity	0.916084	AT2G43520
GO:0005634	nucleus	0.916523	AT3G53650,AT5G58350,AT5G13080,AT1G27730,AT1G31930,AT2G38470,AT1G43160,AT1G19850,AT4G18950,AT5G54160,AT2G39660,AT4G01720,AT1G80840,AT4G31550,AT1G69490,AT1G68840,AT1G34370,AT5G49520,AT1G10585,AT4G22070,AT5G46350,AT3G50260,AT5G22570,AT2G30250,AT5G05140,AT5G39610,AT3G26090,AT3G01970,AT4G25350,AT1G18860,AT2G22850,AT5G25350,AT3G20510,AT5G24110,AT5G25440,AT4G01250,AT1G68150,AT5G67450,AT4G18170,AT2G23320…
GO:0005834	heterotrimeric G-protein complex	0.917282	AT5G42010,AT1G64610
GO:0009615	response to virus	0.917807	AT3G04720
GO:0009505	plant-type cell wall	0.92584	AT2G26440,AT4G20830,AT1G74000,AT2G45220,AT2G16430,AT1G32960,AT3G02880,AT2G30490,AT1G44130,AT2G47550,AT1G74010,AT3G43270
GO:0005643	nuclear pore	0.927419	AT4G17500
GO:0005507	copper ion binding	0.943579	AT2G44790,AT4G39830,AT5G20230
GO:0042626	ATPase activity, coupled to transmembrane movement of substances	0.946429	AT2G47000,AT1G15520,AT3G62150
GO:0005794	Golgi apparatus	0.951226	AT2G28110,AT1G30620,AT5G33290
GO:0005739	mitochondrion	0.951698	AT1G32350,AT4G05020,AT3G08640,AT4G26970,AT5G07440,AT4G23290,AT2G41380,AT1G06520,AT5G13420,AT4G23885,AT4G11170,AT4G34200,AT4G33920,AT5G13490,AT1G74360
GO:0048364	root development	0.952381	AT1G31930,AT1G19850
GO:0030528	transcription regulator activity	0.953327	AT5G05140
GO:0009536	plastid	0.953494	AT3G08640,AT5G13490,AT4G39940
GO:0005515	protein binding	0.954291	AT3G61190,AT1G73080,AT2G39380,AT3G05200,AT2G41110,AT2G25470,AT5G27420,AT4G33430,AT4G12070,AT3G13380,AT1G33600,AT4G11170,AT3G55150,AT1G57650,AT2G42360,AT5G05140,AT2G35910,AT5G25350,AT5G66070,AT4G39890,AT4G35480,AT4G04220,AT3G05360,AT5G46520,AT4G23810,AT1G19180,AT2G32660
GO:0045449	regulation of transcription	0.958088	AT2G38250,AT1G34370,AT1G10585,AT2G37430,AT2G40140,AT3G55980,AT2G28710
GO:0005777	peroxisome	0.962264	AT1G20510
GO:0005509	calcium ion binding	0.978355	AT1G30900,AT4G17615,AT2G41110,AT5G24430,AT1G21550,AT3G10300,AT3G01830
GO:0006886	intracellular protein transport	0.982026	AT3G52400,AT3G11820
GO:0009624	response to nematode	0.982603	AT4G32650,AT1G58340
GO:0003677	DNA binding	0.989007	AT1G66230,AT3G53650,AT1G43160,AT1G18570,AT2G47190,AT1G68840,AT3G50260,AT4G05100,AT5G05140,AT4G17500,AT2G22850,AT3G23250,AT5G67450,AT5G13330,AT4G23810,AT5G13820,AT3G59080
GO:0016021	integral to membrane	0.995911	AT5G11210,AT1G05300,AT3G25610,AT5G44240,AT1G64170,AT4G25350,AT3G62150,AT2G29110,AT1G61800,AT4G23700,AT1G78000,AT3G45060
GO:0045454	cell redox homeostasis	0.999373	AT1G69880
GO:0008270	zinc ion binding	0.999504	AT1G27730,AT3G05200,AT5G27420,AT5G24760,AT5G59820,AT3G28210,AT1G34370,AT2G37430,AT2G42360,AT2G35910,AT2G17730,AT2G27660,AT5G66070,AT5G04340,AT4G35480,AT5G67450,AT2G28710
GO:0003723	RNA binding	0.999966	AT3G19130
GO:0010118	stomatal movement	1	AT4G17615
GO:0009821	alkaloid biosynthetic process	1	AT3G51440,AT3G51450
GO:0009607	response to biotic stimulus	1	AT5G05440,AT1G15520
GO:0006499	N-terminal protein myristoylation	1	AT1G69880,AT4G17615,AT5G24430,AT3G01290,AT1G18890,AT2G39660,AT5G39580,AT1G07630,AT1G21010,AT5G01540,AT2G28890,AT5G64120,AT1G10410,AT5G44290,AT3G61930,AT5G25440,AT3G54030,AT3G53180,AT3G20410,AT4G23700
GO:0006817	phosphate transport	1	AT3G52190
GO:0006571	tyrosine biosynthetic process	1	AT5G34930
GO:0008565	protein transporter activity	1	AT4G12120
GO:0048767	root hair elongation	1	AT2G47000
GO:0015576	sorbitol transmembrane transporter activity	1	AT3G18830
GO:0009052	pentose-phosphate shunt, non-oxidative branch	1	AT5G13420,AT2G45290
GO:0000786	nucleosome	1	AT3G53650
GO:0006810	transport	1	AT3G63380,AT1G08920,AT3G48850,AT4G30190,AT5G27520,AT3G25610,AT5G44240,AT4G24570,AT3G62150,AT3G18830,AT1G16370,AT4G37640,AT4G36670,AT5G13490,AT3G45060
GO:0030104	water homeostasis	1	AT3G53720
GO:0016310	phosphorylation	1	AT5G26340,AT4G39940
GO:0046109	uridine biosynthetic process	1	AT1G71100
GO:0004657	proline dehydrogenase activity	1	AT5G38710
GO:0009407	toxin catabolic process	1	AT1G69930,AT2G29460,AT2G29470,AT1G74590,AT3G09270
GO:0005355	glucose transmembrane transporter activity	1	AT3G18830
GO:0006099	tricarboxylic acid cycle	1	AT1G53310
GO:0008283	cell proliferation	1	AT2G22860,AT3G49780
GO:0006955	immune response	1	AT1G29690
GO:0016442	RNA-induced silencing complex	1	AT5G61780
GO:0016020	membrane	1	AT3G61190,AT3G63380,AT1G08920,AT2G29100,AT5G11210,AT3G55740,AT2G26560,AT1G22570,AT1G44800,AT5G48410,AT3G01290,AT1G06520,AT5G26340,AT4G35180,AT2G39530,AT1G58340,AT5G52050,AT1G05300,AT1G08090,AT3G25610,AT5G44240,AT1G70300,AT2G47000,AT5G33290,AT4G21120,AT4G23190,AT1G77380,AT2G15390,AT5G55930,AT1G79450,AT2G29110,AT3G18830,AT1G16370,AT4G27730,AT3G23550,AT4G36670,AT5G46050,AT4G21680,AT1G61800,AT5G48400…
GO:0019005	SCF ubiquitin ligase complex	1	AT5G25350
GO:0008142	oxysterol binding	1	AT4G08180
GO:0015297	antiporter activity	1	AT5G52050,AT3G23550,AT1G61800
GO:0009939	positive regulation of gibberellic acid mediated signaling	1	AT3G63010
GO:0005792	microsome	1	AT3G26830,AT1G19250
GO:0015706	nitrate transport	1	AT5G50200,AT1G08090
GO:0004081	bis(5'-nucleosyl)-tetraphosphatase (asymmetrical) activity	1	AT1G30110
GO:0030154	cell differentiation	1	AT2G22860,AT3G49780
GO:0042128	nitrate assimilation	1	AT5G37600
GO:0019656	glucose catabolic process to D-lactate and ethanol	1	AT1G74030
GO:0004749	ribose phosphate diphosphokinase activity	1	AT1G10700
GO:0004801	transaldolase activity	1	AT5G13420
GO:0015865	purine nucleotide transport	1	AT5G13490
GO:0047205	quinate O-hydroxycinnamoyltransferase activity	1	AT5G48930
GO:0008631	induction of apoptosis by oxidative stress	1	AT4G11280
GO:0051938	L-glutamate import	1	AT4G21120
GO:0004031	aldehyde oxidase activity	1	AT5G20960
GO:0046872	metal ion binding	1	AT1G17420,AT2G35730,AT4G14630,AT2G36950,AT1G72520,AT1G09560
GO:0008324	cation transmembrane transporter activity	1	AT1G05300
GO:0006118	electron transport	1	AT1G32350,AT5G54500,AT4G05020,AT3G09940,AT2G44790,AT2G45570,AT1G19250,AT3G48890,AT1G28480,AT1G03850,AT5G20230,AT5G15490
GO:0015591	D-ribose transmembrane transporter activity	1	AT3G18830
GO:0009749	response to glucose stimulus	1	AT1G31930,AT3G26090
GO:0006334	nucleosome assembly	1	AT3G53650
GO:0004802	transketolase activity	1	AT2G45290
GO:0000257	nitrilase activity	1	AT5G22300
GO:0007169	transmembrane receptor protein tyrosine kinase signaling pathway	1	AT1G73080,AT2G02220,AT3G02880,AT4G39270,AT1G74360
GO:0050302	indole-3-acetaldehyde oxidase activity	1	AT5G20960
GO:0031012	extracellular matrix	1	AT2G22860,AT3G49780
GO:0009850	auxin metabolic process	1	AT3G02875,AT1G44350
GO:0009535	chloroplast thylakoid membrane	1	AT3G48890
GO:0019648	formaldehyde assimilation via xylulose monophosphate cycle	1	AT2G45290
GO:0005856	cytoskeleton	1	AT3G60260
GO:0006865	amino acid transport	1	AT3G55740,AT4G35180,AT5G40780
GO:0003840	gamma-glutamyltransferase activity	1	AT4G39640
GO:0015152	glucose-6-phosphate transmembrane transporter activity	1	AT1G61800
GO:0005358	high-affinity hydrogen:glucose symporter activity	1	AT5G26340
GO:0016207	4-coumarate-CoA ligase activity	1	AT1G20510,AT3G21230,AT1G51680,AT3G21240
GO:0009942	longitudinal axis specification	1	AT1G19850
GO:0000103	sulfate assimilation	1	AT4G39940
GO:0009051	pentose-phosphate shunt, oxidative branch	1	AT5G11670,AT5G40760
GO:0009117	nucleotide metabolic process	1	AT3G57550,AT4G29700
GO:0004871	signal transducer activity	1	AT1G31930,AT5G42010,AT1G64610
GO:0005354	galactose transmembrane transporter activity	1	AT3G18830
GO:0016702	oxidoreductase activity, acting on single donors with incorporation of molecular oxygen, incorporation of two atoms of oxygen	1	AT1G17420,AT1G72520
GO:0019658	glucose catabolic process to lactate and acetate	1	AT5G13420,AT1G74030,AT2G45290
GO:0048544	recognition or rejection of self pollen	1	AT1G61360,AT1G61420,AT4G21380,AT1G61380,AT1G61370,AT4G21390
GO:0050691	regulation of defense response to virus by host	1	AT1G80840
GO:0047172	shikimate O-hydroxycinnamoyltransferase activity	1	AT5G48930
GO:0015148	D-xylose transmembrane transporter activity	1	AT3G18830
GO:0006073	glucan metabolic process	1	AT4G25810,AT4G30280
GO:0003674	molecular_function	1	AT1G65690,AT3G43250,AT5G13220,AT5G56980,AT5G64890,AT1G15670,AT5G53110,AT3G57280,AT3G05500,AT3G22060,AT4G19370,AT5G08240,AT1G22180,AT1G35230,AT2G25735,AT4G36110,AT3G08640,AT5G64905,AT4G23010,AT3G55470,AT2G44080,AT2G40000,AT5G44990,AT1G52200,AT1G44800,AT2G39210,AT4G30230,AT2G20010,AT2G32240,AT2G20960,AT5G05440,AT3G21080,AT1G30135,AT2G31945,AT4G34180,AT3G13910,AT1G76070,AT4G23885,AT3G28930,AT4G28460…
GO:0019725	cellular homeostasis	1	AT3G61190
GO:0006511	ubiquitin-dependent protein catabolic process	1	AT5G25350
GO:0015969	guanosine tetraphosphate metabolic process	1	AT3G14050
GO:0015168	glycerol transmembrane transporter activity	1	AT3G18830
GO:0004034	aldose 1-epimerase activity	1	AT4G25900
GO:0016756	glutathione gamma-glutamylcysteinyltransferase activity	1	AT4G39640
GO:0005740	mitochondrial envelope	1	AT1G32350,AT5G13490
GO:0016616	oxidoreductase activity, acting on the CH-OH group of donors, NAD or NADP as acceptor	1	AT4G34200
GO:0004751	ribose-5-phosphate isomerase activity	1	AT1G71100
GO:0016174	NAD(P)H oxidase activity	1	AT5G51060
GO:0006944	membrane fusion	1	AT3G52400,AT3G11820
GO:0012505	endomembrane system	1	AT1G51890,AT4G12470,AT5G56980,AT5G20050,AT5G53110,AT5G57480,AT1G21310,AT5G45280,AT1G73080,AT3G13790,AT5G36220,AT3G22060,AT4G19370,AT3G18280,AT2G29100,AT4G04960,AT5G01560,AT5G24090,AT3G05200,AT1G26380,AT1G26390,AT1G51820,AT4G28350,AT5G27420,AT5G48410,AT3G51450,AT5G03610,AT3G16530,AT1G76470,AT2G38860,AT2G43620,AT3G59700,AT5G15730,AT2G31945,AT4G34180,AT5G03700,AT1G76930,AT3G48520,AT4G28460,AT4G12480…
GO:0009960	endosperm development	1	AT5G54650
GO:0006108	malate metabolic process	1	AT5G11670
GO:0019139	cytokinin dehydrogenase activity	1	AT1G75450
GO:0005737	cytoplasm	1	AT1G69930,AT5G58350,AT2G26560,AT4G18950,AT5G54160,AT2G39660,AT1G19640,AT2G22470,AT3G53260,AT1G71100,AT4G39670,AT2G29460,AT3G06350,AT2G29470,AT3G20510,AT2G37040,AT5G25440,AT1G74590,AT3G09270,AT3G14060,AT5G54650
GO:0004656	procollagen-proline 4-dioxygenase activity	1	AT3G06300
GO:0031347	regulation of defense response	1	AT1G80840,AT4G23810
GO:0006006	glucose metabolic process	1	AT5G40760
GO:0006014	D-ribose metabolic process	1	AT5G51830
GO:0008150	biological_process	1	AT1G65690,AT1G49450,AT3G43250,AT5G56980,AT1G15670,AT5G53110,AT3G57280,AT1G28680,AT5G45280,AT3G05500,AT4G19370,AT5G08240,AT1G22180,AT4G30490,AT2G25735,AT3G08640,AT4G23010,AT3G55470,AT5G44990,AT1G52200,AT5G12930,AT2G39210,AT3G06500,AT4G30230,AT2G20010,AT2G32240,AT2G20960,AT5G39050,AT3G09410,AT3G21080,AT1G30135,AT2G31945,AT4G34180,AT3G13910,AT1G76070,AT4G23885,AT4G12070,AT4G28460,AT3G57450,AT4G01960…
GO:0008202	steroid metabolic process	1	AT4G08180
GO:0008441	3'(2'),5'-bisphosphate nucleotidase activity	1	AT5G63990
GO:0005730	nucleolus	1	AT2G39660
GO:0009750	response to fructose stimulus	1	AT1G31930
GO:0005097	RAB GTPase activator activity	1	AT4G28550
GO:0005911	cell-cell junction	1	AT1G70140
GO:0031227	intrinsic to endoplasmic reticulum membrane	1	AT1G19250
GO:0019683	glyceraldehyde-3-phosphate catabolic process	1	AT1G74030
GO:0006855	multidrug transport	1	AT5G52050,AT1G15520,AT3G23550
GO:0045489	pectin biosynthetic process	1	AT5G33290
GO:0006950	response to stress	1	AT5G61560,AT2G23680
GO:0009524	phragmoplast	1	AT5G54650
GO:0005829	cytosol	1	AT5G37600,AT2G35930,AT1G21120,AT5G54160,AT3G09940,AT1G33030,AT4G25350,AT5G40760,AT1G67980,AT1G21100
GO:0046910	pectinesterase inhibitor activity	1	AT3G47380,AT1G14890
GO:0016165	lipoxygenase activity	1	AT1G17420,AT1G72520
GO:0016998	cell wall catabolic process	1	AT5G62150,AT1G02360,AT4G01700,AT3G47540,AT2G43590
GO:0000781	chromosome, telomeric region	1	AT5G13820
GO:0003841	1-acylglycerol-3-phosphate O-acyltransferase activity	1	AT1G06520
GO:0010197	polar nucleus fusion	1	AT4G33050
GO:0010398	xylogalacturonan metabolic process	1	AT5G33290
GO:0018401	peptidyl-proline hydroxylation to 4-hydroxy-L-proline	1	AT2G17720,AT3G06300
GO:0010167	response to nitrate	1	AT5G50200,AT1G08090
GO:0030198	extracellular matrix organization and biogenesis	1	AT3G07390
GO:0005789	endoplasmic reticulum membrane	1	AT4G37640
GO:0010051	xylem and phloem pattern formation	1	AT1G19850
GO:0019575	sucrose catabolic process, using beta-fructofuranosidase	1	AT5G51830
GO:0005575	cellular_component	1	AT1G49450,AT5G54500,AT3G43250,AT5G13220,AT5G64890,AT1G15670,AT1G69880,AT1G28680,AT3G05500,AT5G08240,AT1G22180,AT2G38870,AT1G61120,AT1G65610,AT5G64905,AT4G23010,AT3G55470,AT2G40000,AT5G44990,AT2G39210,AT4G30230,AT1G22400,AT1G80460,AT1G05000,AT2G42060,AT3G46930,AT1G28390,AT2G32240,AT5G24230,AT2G20960,AT4G39230,AT5G39050,AT5G05440,AT3G21080,AT1G30135,AT5G11670,AT3G13910,AT1G71697,AT3G28930,AT4G12070…
GO:0010315	auxin efflux	1	AT2G47000
GO:0043091	L-arginine import	1	AT4G21120
GO:0005618	cell wall	1	AT4G02330,AT5G44420,AT5G64120,AT4G25810,AT3G14060,AT4G30280,AT5G54650
GO:0009700	indole phytoalexin biosynthetic process	1	AT3G26830
GO:0008168	methyltransferase activity	1	AT1G55450,AT2G41380,AT1G21120,AT4G22530,AT3G54150,AT1G21100
GO:0005471	ATP:ADP antiporter activity	1	AT5G13490
GO:0019650	glucose catabolic process to butanediol	1	AT1G74030
GO:0015992	proton transport	1	AT3G63380,AT4G30190
GO:0008219	cell death	1	AT2G39200,AT1G29690,AT1G61560,AT3G45290
GO:0009926	auxin polar transport	1	AT2G47000
GO:0009605	response to external stimulus	1	AT4G11280
GO:0015144	carbohydrate transmembrane transporter activity	1	AT1G08920,AT5G26340,AT3G18830,AT1G16370,AT4G36670
GO:0005622	intracellular	1	AT2G44080,AT5G59820,AT4G18430,AT3G21700,AT2G37430,AT5G04340,AT2G28710,AT5G45750,AT4G28550,AT3G15060
GO:0009543	chloroplast thylakoid lumen	1	AT1G79450
GO:0008146	sulfotransferase activity	1	AT5G07010
GO:0005524	ATP binding	1	AT1G73080,AT4G11170,AT2G02220,AT3G02880,AT1G66090,AT4G39270,AT4G39940,AT5G46520,AT1G74360,AT4G09420
GO:0032107	regulation of response to nutrient levels	1	AT5G13080
GO:0050373	UDP-arabinose 4-epimerase activity	1	AT1G30620
GO:0010102	lateral root morphogenesis	1	AT3G07390
GO:0004665	prephenate dehydrogenase (NADP+) activity	1	AT5G34930
GO:0016844	strictosidine synthase activity	1	AT3G51440,AT3G51450,AT1G74000,AT1G74020,AT1G74010
GO:0043234	protein complex	1	AT4G33430
GO:0008601	protein phosphatase type 2A regulator activity	1	AT3G26020
GO:0031224	intrinsic to membrane	1	AT5G45000,AT1G65390,AT5G44910,AT1G52900,AT1G66090,AT5G45090,AT1G57630,AT5G46520,AT4G09420
GO:0009963	positive regulation of flavonoid biosynthetic process	1	AT5G48930
GO:0009094	L-phenylalanine biosynthetic process	1	AT3G44720
GO:0048507	meristem development	1	AT1G19850
GO:0046873	metal ion transmembrane transporter activity	1	AT1G05300
GO:0019722	calcium-mediated signaling	1	AT4G17615
GO:0004107	chorismate synthase activity	1	AT1G48850
GO:0007010	cytoskeleton organization and biogenesis	1	AT4G30160
GO:0031314	extrinsic to mitochondrial inner membrane	1	AT4G05020
GO:0005795	Golgi stack	1	AT3G09020
GO:0004352	glutamate dehydrogenase activity	1	AT5G07440
GO:0015575	mannitol transmembrane transporter activity	1	AT3G18830
GO:0015662	ATPase activity, coupled to transmembrane movement of ions, phosphorylative mechanism	1	AT3G25610,AT5G44240
GO:0015712	hexose phosphate transport	1	AT1G61800
GO:0016597	amino acid binding	1	AT4G34200
GO:0005365	myo-inositol transmembrane transporter activity	1	AT3G18830
GO:0006015	5-phosphoribose 1-diphosphate biosynthetic process	1	AT5G13420,AT2G45290
GO:0009744	response to sucrose stimulus	1	AT1G31930,AT3G49620
GO:0009423	chorismate biosynthetic process	1	AT4G39980
GO:0008964	phosphoenolpyruvate carboxylase activity	1	AT1G53310
GO:0005525	GTP binding	1	AT1G09630,AT4G18430,AT3G21700,AT4G39890,AT5G45750,AT3G15060
GO:0003978	UDP-glucose 4-epimerase activity	1	AT1G63180
GO:0045487	gibberellin catabolic process	1	AT1G02400
GO:0032313	regulation of Rab GTPase activity	1	AT4G28550
GO:0008415	acyltransferase activity	1	AT1G06520
GO:0006012	galactose metabolic process	1	AT4G25900
GO:0005217	intracellular ligand-gated ion channel activity	1	AT2G29100,AT5G11210,AT5G48410,AT2G29110,AT5G48400

## Sheet: Tsuda GO terms Induced
Term	Desc	PCI PVAL	Genes
GO:0009627	systemic acquired resistance	6.84879e-09	AT3G52430,AT3G04720,AT1G59870,AT2G14610,AT3G57260,AT1G74710,AT1G75040
GO:0009695	jasmonic acid biosynthetic process	2.68392e-08	AT5G42650,AT2G33150,AT2G06050
GO:0016563	transcription activator activity	3.13825e-08	AT4G27410,AT5G47230,AT4G17500,AT4G23810
GO:0006569	tryptophan catabolic process	9.91396e-08	AT2G22330,AT4G39950
GO:0016301	kinase activity	1.04669e-07	AT1G51660,AT1G21250,AT1G09970,AT2G19190,AT2G05940,AT4G23150,AT5G01820,AT4G01370
GO:0016564	transcription repressor activity	3.97607e-07	AT1G27730,AT3G56400,AT3G15210
GO:0004364	glutathione transferase activity	5.40293e-07	AT2G29450,AT2G29420,AT2G29460
GO:0050832	defense response to fungus	1.25564e-06	AT2G40140,AT4G12470,AT4G12480,AT3G52400,AT2G38870,AT5G64120,AT3G56400,AT3G11820,AT2G30770,AT2G43510,AT2G37130,AT1G45145,AT1G74710,AT4G31800,AT2G14560
GO:0005975	carbohydrate metabolic process	1.80617e-06	AT1G04410,AT1G62660,AT1G61810,AT1G80460
GO:0006457	protein folding	2.95111e-06	AT5G61790,AT3G09440,AT1G14980,AT5G02490
GO:0004568	chitinase activity	3.57534e-06	AT3G54420,AT4G01700,AT2G43570,AT2G43620
GO:0000162	tryptophan biosynthetic process	1.02765e-05	AT2G04400,AT4G31500
GO:0004707	MAP kinase activity	1.5831e-05	AT4G01370,AT2G01450
GO:0009699	phenylpropanoid biosynthetic process	2.81249e-05	AT4G36220,AT2G30490,AT2G37040
GO:0030599	pectinesterase activity	2.88047e-05	AT4G02330,AT1G11580
GO:0019825	oxygen binding	3.27724e-05	AT5G42650,AT5G57220,AT2G22330,AT4G39950,AT2G30770,AT4G31500,AT3G26830
GO:0006612	protein targeting to membrane	3.39328e-05	AT3G52400,AT3G11820
GO:0004601	peroxidase activity	5.37685e-05	AT5G64120,AT2G37130
GO:0006508	proteolysis	9.80425e-05	AT3G02875,AT1G44350,AT3G51330
GO:0004806	triacylglycerol lipase activity	0.000122568	AT3G52430,AT2G30550
GO:0030001	metal ion transport	0.000150156	AT5G52760,AT1G80830,AT2G36950,AT5G60800
GO:0004553	hydrolase activity, hydrolyzing O-glycosyl compounds	0.000210608	AT1G62660,AT3G13790,AT1G61810,AT3G57240,AT3G57260,AT2G44490
GO:0046292	formaldehyde metabolic process	0.000223564	AT5G43940
GO:0003700	transcription factor activity	0.00022684	AT2G40140,AT4G27410,AT5G47230,AT2G30250,AT2G31380,AT1G27730,AT4G17500,AT4G36900,AT3G56400,AT1G43160,AT2G40750,AT1G68840,AT4G23810,AT1G10585,AT1G78080,AT5G04340,AT3G15210,AT1G62300,AT5G22570,AT4G31800,AT4G01250
GO:0035264	multicellular organism growth	0.000248571	AT1G27730
GO:0004338	glucan 1,3-beta-glucosidase activity	0.000260756	AT3G57260
GO:0016002	sulfite reductase activity	0.000266809	AT5G04590
GO:0008061	chitin binding	0.000267165	AT3G04720
GO:0010298	dihydrocamalexic acid decarboxylase activity	0.000275634	AT3G26830
GO:0050017	L-3-cyanoalanine synthase activity	0.000275786	AT3G61440
GO:0047720	indoleacetaldoxime dehydratase activity	0.000275938	AT2G30770
GO:0006629	lipid metabolic process	0.000329549	AT3G52430,AT2G30550
GO:0008810	cellulase activity	0.000348903	AT3G57240,AT3G57260
GO:0009863	salicylic acid mediated signaling pathway	0.00034927	AT3G52400,AT3G11820,AT1G28480,AT4G03550
GO:0015691	cadmium ion transport	0.000416642	AT1G59870,AT1G80830
GO:0051410	detoxification of nitrogen compound	0.000445931	AT3G61440
GO:0006750	glutathione biosynthetic process	0.000446329	AT5G27380
GO:0019499	cyanide metabolic process	0.000447027	AT3G61440
GO:0047746	chlorophyllase activity	0.000526316	AT1G19670
GO:0010211	IAA-Leu conjugate hydrolase activity	0.000535475	AT3G02875
GO:0010210	IAA-Phe conjugate hydrolase activity	0.000535475	AT3G02875
GO:0010178	IAA-amino acid conjugate hydrolase activity	0.000535619	AT1G44350
GO:0009617	response to bacterium	0.00055113	AT4G37990,AT5G01600,AT4G39950,AT3G57240,AT1G33960,AT2G30770,AT1G80460,AT5G06320,AT3G26830,AT1G74710,AT5G02490,AT3G28930
GO:0004425	indole-3-glycerol-phosphate synthase activity	0.000551268	AT2G04400
GO:0006886	intracellular protein transport	0.000564853	AT4G02080,AT3G52400,AT5G05010,AT1G47830,AT3G11820
GO:0015559	multidrug efflux pump activity	0.000571919	AT4G39030
GO:0006468	protein amino acid phosphorylation	0.000631297	AT1G09970,AT2G05940,AT4G23150,AT5G01820
GO:0004722	protein serine/threonine phosphatase activity	0.0006385	AT3G51370,AT3G46820
GO:0004497	monooxygenase activity	0.000697963	AT4G36220,AT4G38540,AT3G26830
GO:0010262	somatic embryogenesis	0.000706547	AT3G54420
GO:0050284	sinapate 1-glucosyltransferase activity	0.000778614	AT4G15490
GO:0000104	succinate dehydrogenase activity	0.000799148	AT5G66760
GO:0006556	S-adenosylmethionine biosynthetic process	0.000891862	AT2G36880
GO:0010374	stomatal complex development	0.000994283	AT1G51660
GO:0009862	systemic acquired resistance, salicylic acid mediated signaling pathway	0.00105275	AT3G52430,AT3G56400,AT4G16890,AT4G01370
GO:0004478	methionine adenosyltransferase activity	0.00109409	AT2G36880
GO:0005576	extracellular region	0.00120056	AT2G02990,AT2G18660,AT2G14610,AT2G43510
GO:0009718	anthocyanin biosynthetic process	0.00133185	AT2G02990
GO:0006289	nucleotide-excision repair	0.00154083	AT5G38470
GO:0004708	MAP kinase kinase activity	0.00162753	AT1G51660
GO:0004370	glycerol kinase activity	0.00213169	AT1G80460
GO:0009561	megagametogenesis	0.00223602	AT4G34200
GO:0016671	oxidoreductase activity, acting on sulfur group of donors, disulfide as acceptor	0.00239617	AT1G45145
GO:0003843	1,3-beta-glucan synthase activity	0.00259471	AT4G03550
GO:0004630	phospholipase D activity	0.0026455	AT4G11840
GO:0051287	NAD binding	0.00297458	AT4G34200
GO:0004540	ribonuclease activity	0.00317881	AT2G02990
GO:0008152	metabolic process	0.00335324	AT1G04410,AT4G11840,AT4G15490,AT4G35260,AT3G11340,AT1G68620,AT4G33540,AT4G38540,AT2G32150
GO:0044262	cellular carbohydrate metabolic process	0.00345535	AT1G04410
GO:0006139	nucleobase, nucleoside, nucleotide and nucleic acid metabolic process	0.00356983	AT5G63400
GO:0016298	lipase activity	0.00399042	AT3G52430
GO:0009611	response to wounding	0.0041029	AT1G74020,AT5G50200,AT5G42650,AT2G33150,AT3G13790,AT2G34810,AT1G51680,AT2G38870,AT5G20230,AT2G02990,AT1G27730,AT3G16470,AT5G43940,AT2G30490,AT2G37040,AT2G06050
GO:0010150	leaf senescence	0.0041769	AT3G52430
GO:0016126	sterol biosynthetic process	0.00451904	AT5G24160
GO:0004521	endoribonuclease activity	0.00474433	AT2G02990
GO:0030163	protein catabolic process	0.00489433	AT5G42790
GO:0009965	leaf morphogenesis	0.00543076	AT4G03550
GO:0009790	embryonic development	0.00569448	AT4G02380
GO:0006464	protein modification process	0.0061988	AT4G17470
GO:0004618	phosphoglycerate kinase activity	0.00638145	AT1G79550
GO:0016706	oxidoreductase activity, acting on paired donors, with incorporation or reduction of molecular oxygen, 2-oxoglutarate as one donor, and incorporation of one atom each of oxygen into both donors	0.00662954	AT4G10500
GO:0045730	respiratory burst	0.00739082	AT5G64120
GO:0007568	aging	0.00815016	AT2G02990
GO:0015979	photosynthesis	0.00821857	AT1G27730
GO:0015450	P-P-bond-hydrolysis-driven protein transmembrane transporter activity	0.00841061	AT2G34250
GO:0019200	carbohydrate kinase activity	0.00850054	AT1G80460
GO:0009626	plant-type hypersensitive response	0.00854179	AT4G37990,AT3G54420
GO:0009620	response to fungus	0.00945043	AT1G51680,AT3G11820,AT4G01370,AT4G03550,AT1G11310
GO:0046424	ferulate 5-hydroxylase activity	0.010093	AT4G36220
GO:0016710	trans-cinnamate 4-monooxygenase activity	0.0106129	AT2G30490
GO:0045735	nutrient reservoir activity	0.0111473	AT1G23040,AT4G24350
GO:0019904	protein domain specific binding	0.0118681	AT2G31380
GO:0006828	manganese ion transport	0.0126984	AT1G80830
GO:0020037	heme binding	0.0132695	AT3G48890
GO:0015690	aluminum ion transport	0.0159236	AT5G20230
GO:0009809	lignin biosynthetic process	0.0169718	AT4G34230,AT4G36220
GO:0007275	multicellular organismal development	0.0171317	AT4G27410
GO:0005515	protein binding	0.0171739	AT5G06860,AT2G42360,AT4G14365,AT5G05010,AT3G52430,AT5G06870,AT1G47830,AT3G05200,AT4G26400,AT2G47170,AT1G02450,AT4G23810,AT3G02520,AT1G75950,AT1G09070,AT3G15210,AT2G18960
GO:0006355	regulation of transcription, DNA-dependent	0.0173077	AT5G47230,AT2G30250,AT4G17500,AT4G36900,AT3G56400,AT1G43160,AT2G40750,AT1G68840,AT4G23810,AT1G78080,AT3G15210,AT1G62300,AT5G22570,AT4G31800,AT4G01250
GO:0006826	iron ion transport	0.0188088	AT5G01600
GO:0009864	induced systemic resistance, jasmonic acid mediated signaling pathway	0.0190943	AT3G56400,AT3G15210
GO:0006857	oligopeptide transport	0.0196865	AT5G46050,AT3G47960
GO:0006839	mitochondrial transport	0.0219216	AT2G22500,AT4G01100
GO:0009684	indoleacetic acid biosynthetic process	0.021978	AT2G22330,AT4G39950,AT4G31500
GO:0019748	secondary metabolic process	0.0220041	AT4G10500
GO:0005484	SNAP receptor activity	0.0258117	AT3G52400,AT3G11820
GO:0004674	protein serine/threonine kinase activity	0.0271827	AT1G09970
GO:0006623	protein targeting to vacuole	0.0278422	AT1G09070
GO:0051861	glycolipid binding	0.0310405	AT4G39670
GO:0000165	MAPKKK cascade	0.0344828	AT1G51660
GO:0042539	hypotonic salinity response	0.0353175	AT4G01370
GO:0009867	jasmonic acid mediated signaling pathway	0.0356467	AT3G52400,AT3G11820,AT1G28480
GO:0009306	protein secretion	0.036036	AT2G34250
GO:0006972	hyperosmotic response	0.0366972	AT4G01370
GO:0009409	response to cold	0.03709	AT2G40140,AT5G04590,AT5G47230,AT5G01600,AT5G57560,AT2G36530,AT3G50970,AT1G27730,AT4G02380,AT2G37190,AT4G01370,AT3G16470,AT5G38470,AT3G57260,AT3G22370
GO:0016051	carbohydrate biosynthetic process	0.0375348	AT2G47180
GO:0005886	plasma membrane	0.0377056	AT1G71880,AT4G13510,AT1G21250,AT3G52400,AT1G59870,AT3G11820,AT3G02520,AT5G06320,AT4G03550,AT4G25900,AT1G11310,AT2G18960,AT2G39200
GO:0048037	cofactor binding	0.0384621	AT4G34200
GO:0016709	oxidoreductase activity, acting on paired donors, with incorporation or reduction of molecular oxygen, NADH or NADPH as one donor, and incorporation of one atom of oxygen	0.0407789	AT4G31500
GO:0009641	shade avoidance	0.0423729	AT4G31500
GO:0009861	jasmonic acid and ethylene-dependent systemic resistance	0.0478754	AT5G44420,AT4G01370
GO:0008417	fucosyltransferase activity	0.048423	AT2G15390
GO:0005516	calmodulin binding	0.0498004	AT4G33050,AT1G11310,AT2G39200,AT5G26920
GO:0015692	lead ion transport	0.0500688	AT1G80830
GO:0010017	red or far red light signaling pathway	0.0515464	AT2G37970
GO:0009698	phenylpropanoid metabolic process	0.0519874	AT1G51680
GO:0009644	response to high light intensity	0.0538385	AT1G27730,AT2G47180
GO:0008289	lipid binding	0.0538831	AT4G12470,AT4G12480
GO:0009870	defense response signaling pathway, resistance gene-dependent	0.0564972	AT4G03550
GO:0009646	response to absence of light	0.0625	AT5G20230
GO:0042742	defense response to bacterium	0.0684932	AT5G52640,AT2G19190,AT3G56400,AT2G30770,AT1G80460,AT1G02450,AT5G06320,AT1G74710,AT4G31800
GO:0009625	response to insect	0.0696438	AT5G44420,AT3G52430
GO:0003735	structural constituent of ribosome	0.0715871	AT2G37190
GO:0000326	protein storage vacuole	0.0740741	AT1G09070
GO:0009868	jasmonic acid and ethylene-dependent systemic resistance, jasmonic acid mediated signaling pathway	0.0771633	AT4G01370
GO:0009817	defense response to fungus, incompatible interaction	0.0777906	AT1G59870,AT1G11310,AT2G39200,AT2G44490
GO:0016762	xyloglucan:xyloglucosyl transferase activity	0.0781547	AT5G57560
GO:0005215	transporter activity	0.0869433	AT4G39030,AT5G46050,AT1G12110,AT3G47960
GO:0048830	adventitious root development	0.0869565	AT4G31500
GO:0010117	photoprotection	0.0883555	AT1G27730
GO:0004564	beta-fructofuranosidase activity	0.094286	AT3G13790
GO:0009793	embryonic development ending in seed dormancy	0.0960558	AT2G47470
GO:0000159	protein phosphatase type 2A complex	0.0961945	AT1G13320,AT1G25490
GO:0051119	sugar transmembrane transporter activity	0.0980392	AT1G08930
GO:0031407	oxylipin metabolic process	0.1	AT5G42650
GO:0031201	SNARE complex	0.1	AT3G11820
GO:0051087	chaperone binding	0.101902	AT1G14980
GO:0046870	cadmium ion binding	0.102041	AT5G44070
GO:0008194	UDP-glycosyltransferase activity	0.104668	AT4G15490,AT3G11340
GO:0010111	glyoxysome organization and biogenesis	0.111111	AT2G33150
GO:0006983	ER overload response	0.111111	AT5G47120
GO:0046836	glycolipid transport	0.112901	AT4G39670
GO:0007166	cell surface receptor linked signal transduction	0.116009	AT1G21250
GO:0009814	defense response, incompatible interaction	0.125425	AT1G51660
GO:0016887	ATPase activity	0.134081	AT4G32530,AT5G58290,AT2G16510,AT2G18960,AT3G28540
GO:0000164	protein phosphatase type 1 complex	0.142857	AT3G46820
GO:0009816	defense response to bacterium, incompatible interaction	0.153205	AT3G52430,AT2G40000,AT4G16890,AT4G23810
GO:0003677	DNA binding	0.156236	AT5G47230,AT1G09200,AT4G17500,AT4G36900,AT1G43160,AT1G68840,AT5G65360,AT4G23810,AT1G78080,AT3G15210
GO:0008553	hydrogen-exporting ATPase activity, phosphorylative mechanism	0.157895	AT2G18960
GO:0010114	response to red light	0.161538	AT4G31500
GO:0005488	binding	0.162223	AT5G13490,AT2G22500,AT4G10840,AT4G01100,AT4G34200,AT2G37970
GO:0008506	sucrose:hydrogen symporter activity	0.163232	AT3G19930,AT1G71880
GO:0019563	glycerol catabolic process	0.166667	AT1G80460
GO:0003684	damaged DNA binding	0.167281	AT5G38470
GO:0016036	cellular response to phosphate starvation	0.182927	AT2G02990
GO:0015145	monosaccharide transmembrane transporter activity	0.188235	AT3G19930
GO:0005887	integral to plasma membrane	0.193964	AT3G19930
GO:0005769	early endosome	0.214286	AT3G54840
GO:0008643	carbohydrate transport	0.216237	AT1G11260,AT4G36670
GO:0016481	negative regulation of transcription	0.219538	AT1G02450
GO:0010188	response to microbial phytotoxin	0.227273	AT1G80460,AT1G45145
GO:0016798	hydrolase activity, acting on glycosyl bonds	0.229783	AT5G57560
GO:0008199	ferric iron binding	0.229786	AT5G01600
GO:0007264	small GTPase mediated signal transduction	0.230047	AT4G02080
GO:0031225	anchored to membrane	0.238112	AT5G20230,AT1G23040,AT5G15350,AT4G37450,AT2G17120,AT3G51330
GO:0009759	indole glucosinolate biosynthetic process	0.241758	AT3G56400,AT4G31500
GO:0019395	fatty acid oxidation	0.25	AT2G33150
GO:0046029	mannitol dehydrogenase activity	0.25	AT4G37990
GO:0018456	aryl-alcohol dehydrogenase activity	0.25	AT4G37990
GO:0042631	cellular response to water deprivation	0.25276	AT4G02380
GO:0051245	negative regulation of cellular defense response	0.261905	AT3G52400,AT3G11820
GO:0045941	positive regulation of transcription	0.270237	AT4G23810
GO:0010224	response to UV-B	0.295325	AT4G36220,AT1G75040
GO:0006915	apoptosis	0.297297	AT5G47120
GO:0030125	clathrin vesicle coat	0.30303	AT1G47830
GO:0009651	response to salt stress	0.304333	AT1G27730,AT2G33380,AT4G01370
GO:0016787	hydrolase activity	0.308203	AT1G68620,AT2G32150
GO:0016757	transferase activity, transferring glycosyl groups	0.310317	AT4G15490,AT2G15390,AT4G03550
GO:0008233	peptidase activity	0.313751	AT5G42790
GO:0009408	response to heat	0.318998	AT5G52640,AT5G57560,AT3G09440,AT2G47180,AT1G14980,AT5G02490
GO:0051082	unfolded protein binding	0.321105	AT5G52640,AT5G61790
GO:0000302	response to reactive oxygen species	0.332056	AT4G02380
GO:0007140	male meiosis	0.333333	AT1G75950
GO:0015996	chlorophyll catabolic process	0.333333	AT1G19670,AT4G22920
GO:0002213	defense response to insect	0.334565	AT3G52430
GO:0016758	transferase activity, transferring hexosyl groups	0.33564	AT2G47180
GO:0016740	transferase activity	0.339082	AT2G39980
GO:0003924	GTPase activity	0.373333	AT3G54840
GO:0001666	response to hypoxia	0.373346	AT3G52430
GO:0017089	glycolipid transporter activity	0.375	AT4G39670
GO:0010039	response to iron ion	0.381818	AT5G01600,AT1G08830
GO:0009873	ethylene mediated signaling pathway	0.396565	AT5G47230
GO:0000502	proteasome complex	0.4	AT5G42790
GO:0009978	allene oxide synthase activity	0.4	AT5G42650
GO:0006869	lipid transport	0.405614	AT4G12470,AT4G12480
GO:0009414	response to water deprivation	0.41803	AT4G27410,AT4G00430,AT3G50970,AT1G27730,AT1G12110,AT2G18960
GO:0016491	oxidoreductase activity	0.431842	AT5G24160,AT2G37760
GO:0016469	proton-transporting two-sector ATPase complex	0.435897	AT4G32530,AT2G16510
GO:0015112	nitrate transmembrane transporter activity	0.437063	AT5G50200,AT1G12110
GO:0009055	electron carrier activity	0.439018	AT2G34810
GO:0010120	camalexin biosynthetic process	0.444444	AT2G22330,AT4G39950,AT3G56400,AT2G30770,AT3G26830
GO:0010286	heat acclimation	0.462665	AT5G43940
GO:0008540	proteasome regulatory particle, base subcomplex	0.470588	AT5G58290
GO:0006952	defense response	0.471824	AT4G39030,AT5G06860,AT5G42650,AT5G44420,AT5G06870,AT2G03760,AT3G11820,AT4G16890,AT2G14610,AT2G43510,AT2G37040,AT1G11310,AT2G39200
GO:0002237	response to molecule of bacterial origin	0.473846	AT1G80460
GO:0006979	response to oxidative stress	0.493367	AT2G29450,AT5G20230,AT1G27730,AT2G40000,AT4G02380,AT1G45145,AT2G37040,AT4G02580,AT1G08830
GO:0051607	defense response to virus	0.495453	AT5G06320
GO:0009411	response to UV	0.496549	AT1G51680
GO:0031348	negative regulation of defense response	0.5	AT4G39030,AT3G52430,AT1G59870,AT3G11820,AT1G11310,AT1G74710
GO:0009741	response to brassinosteroid stimulus	0.5	AT5G57560
GO:0043069	negative regulation of programmed cell death	0.5	AT3G52400,AT3G11820,AT5G47120
GO:0005798	Golgi-associated vesicle	0.5	AT2G47170
GO:0010363	regulation of plant-type hypersensitive response	0.5	AT3G52400,AT3G11820
GO:0003824	catalytic activity	0.523337	AT4G34700,AT4G33540,AT4G34200
GO:0000148	1,3-beta-glucan synthase complex	0.526316	AT4G03550
GO:0046914	transition metal ion binding	0.530322	AT3G48890
GO:0009269	response to desiccation	0.53137	AT2G33380
GO:0009415	response to water	0.545455	AT3G50970
GO:0006875	cellular metal ion homeostasis	0.545455	AT1G80830
GO:0030304	trypsin inhibitor activity	0.571429	AT2G43510
GO:0004017	adenylate kinase activity	0.571429	AT5G63400
GO:0009612	response to mechanical stimulus	0.571429	AT5G57560
GO:0022626	cytosolic ribosome	0.576756	AT2G37190
GO:0042542	response to hydrogen peroxide	0.58827	AT5G01600,AT2G47180
GO:0004867	serine-type endopeptidase inhibitor activity	0.6	AT2G38870
GO:0046688	response to copper ion	0.6	AT1G08830
GO:0045551	cinnamyl-alcohol dehydrogenase activity	0.618182	AT4G34230
GO:0009737	response to abscisic acid stimulus	0.618625	AT4G27410,AT3G50970,AT1G27730,AT3G11820,AT2G33380,AT4G01370,AT3G15210,AT2G18960,AT3G26830
GO:0003676	nucleic acid binding	0.637226	AT1G27730,AT5G04340
GO:0009738	abscisic acid mediated signaling	0.639218	AT1G25490
GO:0004617	phosphoglycerate dehydrogenase activity	0.642857	AT4G34200
GO:0022625	cytosolic large ribosomal subunit	0.646154	AT2G37190
GO:0009615	response to virus	0.653263	AT3G04720
GO:0042372	phylloquinone biosynthetic process	0.666667	AT1G74710
GO:0005839	proteasome core complex	0.678571	AT5G42790
GO:0009631	cold acclimation	0.698862	AT3G50970
GO:0042546	cell wall biogenesis	0.7	AT2G15390
GO:0010200	response to chitin	0.702188	AT1G27730,AT1G08930,AT1G62300
GO:0004634	phosphopyruvate hydratase activity	0.714286	AT2G36530
GO:0005643	nuclear pore	0.71875	AT4G17500
GO:0009723	response to ethylene stimulus	0.72465	AT5G44420,AT3G04720,AT3G15210,AT1G25490
GO:0005506	iron ion binding	0.726199	AT5G01600
GO:0006096	glycolysis	0.732143	AT1G04410,AT1G79550
GO:0051707	response to other organism	0.745306	AT3G52430,AT1G75040
GO:0009916	alternative oxidase activity	0.75	AT3G22370
GO:0045548	phenylalanine ammonia-lyase activity	0.75	AT2G37040
GO:0009664	plant-type cell wall organization and biogenesis	0.75	AT5G57560
GO:0009624	response to nematode	0.752847	AT1G71880,AT4G39030
GO:0005507	copper ion binding	0.754577	AT5G44070,AT5G20230,AT5G15350
GO:0016192	vesicle-mediated transport	0.759927	AT5G05010
GO:0005509	calcium ion binding	0.770256	AT5G39670,AT5G61790,AT2G43290,AT4G27280,AT2G41410,AT2G33380,AT4G20780
GO:0009416	response to light stimulus	0.804944	AT1G77760,AT2G36530,AT2G30490
GO:0016021	integral to membrane	0.80661	AT4G32530,AT2G16510,AT1G10950
GO:0000166	nucleotide binding	0.807273	AT4G16890
GO:0006635	fatty acid beta-oxidation	0.823529	AT2G33150
GO:0000151	ubiquitin ligase complex	0.833333	AT1G75950
GO:0042981	regulation of apoptosis	0.833333	AT5G47120
GO:0009751	response to salicylic acid stimulus	0.841324	AT1G21250,AT2G29420,AT2G40000,AT1G28480,AT4G31800,AT2G14560
GO:0010193	response to ozone	0.846154	AT2G06050
GO:0009753	response to jasmonic acid stimulus	0.857335	AT1G74020,AT5G27380,AT5G42650,AT5G44420,AT2G34810,AT3G56400,AT3G16470
GO:0042545	cell wall modification	0.863636	AT1G11580
GO:0005783	endoplasmic reticulum	0.879685	AT1G77510,AT5G61790,AT2G46170,AT2G25110,AT4G36220,AT5G47120,AT3G02875,AT1G32210,AT2G30490,AT2G47470,AT1G09070,AT1G21750,AT4G31500,AT3G26830
GO:0009505	plant-type cell wall	0.882853	AT1G21250,AT5G61790,AT5G06860,AT5G06870,AT1G11580,AT2G30490,AT2G47470
GO:0015986	ATP synthesis coupled proton transport	0.888889	AT4G32530,AT2G16510
GO:0005777	peroxisome	0.88897	AT2G33150,AT2G06050,AT2G44490
GO:0015171	amino acid transmembrane transporter activity	0.890476	AT4G35180,AT4G38250
GO:0009536	plastid	0.893209	AT5G63400,AT5G04590,AT4G39030,AT5G13490,AT4G01100,AT3G22370,AT1G74710
GO:0009733	response to auxin stimulus	0.89912	AT5G57560,AT4G16890
GO:0007165	signal transduction	0.900736	AT5G06860,AT5G06870,AT5G01820,AT4G01370,AT2G01450
GO:0009789	positive regulation of abscisic acid mediated signaling	0.909091	AT1G25490
GO:0010105	negative regulation of ethylene mediated signaling pathway	0.909091	AT3G15210
GO:0009693	ethylene biosynthetic process	0.916667	AT1G05010
GO:0046686	response to cadmium ion	0.918367	AT5G44070
GO:0005743	mitochondrial inner membrane	0.929288	AT5G13490,AT2G22500,AT4G01100
GO:0045454	cell redox homeostasis	0.930451	AT1G77510,AT1G21750
GO:0009570	chloroplast stroma	0.936508	AT3G02520
GO:0004089	carbonate dehydratase activity	0.942857	AT5G66510
GO:0005739	mitochondrion	0.945348	AT5G66760,AT5G63400,AT4G39030,AT5G61790,AT5G42650,AT2G33150,AT2G36530,AT4G35260,AT5G13490,AT3G61440,AT4G01100,AT4G02580,AT3G22370,AT4G31500,AT4G34200,AT5G66510,AT1G14980
GO:0004842	ubiquitin-protein ligase activity	0.946498	AT2G42360,AT1G75950
GO:0005840	ribosome	0.95082	AT2G37190
GO:0005634	nucleus	0.956069	AT1G51660,AT4G27410,AT5G47230,AT2G30250,AT2G36530,AT1G09200,AT1G27730,AT4G36900,AT5G58290,AT3G56400,AT1G43160,AT2G40750,AT4G01370,AT5G38470,AT1G68840,AT5G65360,AT4G23810,AT1G10585,AT1G78080,AT1G75950,AT3G15210,AT1G62300,AT5G22570,AT4G31800,AT4G01250
GO:0045449	regulation of transcription	0.981928	AT2G40140,AT2G31380,AT1G10585
GO:0042626	ATPase activity, coupled to transmembrane movement of substances	0.982143	AT1G59870
GO:0005794	Golgi apparatus	0.983607	AT1G10950
GO:0009061	anaerobic respiration	0.990476	AT5G63400
GO:0008270	zinc ion binding	0.998673	AT2G42360,AT4G14365,AT2G31380,AT1G27730,AT3G05200,AT4G26400,AT5G04340
GO:0009507	chloroplast	0.999776	AT5G27380,AT5G42650,AT5G01600,AT1G80040,AT2G22330,AT4G39950,AT1G09200,AT4G22920,AT2G41410,AT4G10840,AT4G33540,AT1G68840,AT5G65360,AT2G04400,AT2G30550
GO:0010118	stomatal movement	1	AT1G74710
GO:0005737	cytoplasm	1	AT1G51660,AT2G29450,AT2G29420,AT2G36530,AT5G47120,AT4G01370,AT3G02520,AT2G37040,AT1G75950,AT4G39670,AT1G08830,AT2G29460
GO:0031347	regulation of defense response	1	AT3G56400,AT2G40750,AT4G23810,AT4G31800
GO:0003756	protein disulfide isomerase activity	1	AT1G77510,AT1G21750
GO:0009607	response to biotic stimulus	1	AT4G01370
GO:0019430	removal of superoxide radicals	1	AT1G08830
GO:0006499	N-terminal protein myristoylation	1	AT5G27380,AT5G64120,AT2G47170,AT3G54840,AT2G37970
GO:0009697	salicylic acid biosynthetic process	1	AT4G39030,AT1G74710
GO:0008150	biological_process	1	AT5G39670,AT2G18690,AT1G15670,AT2G43290,AT2G46170,AT1G80040,AT1G65500,AT4G15610,AT5G08240,AT2G39980,AT4G24290,AT2G25110,AT4G27280,AT3G46820,AT2G28400,AT1G23040,AT2G23090,AT4G25030,AT1G27100,AT2G25670,AT1G62480,AT5G26920,AT1G67360
GO:0042325	regulation of phosphorylation	1	AT1G13320
GO:0008565	protein transporter activity	1	AT5G05010
GO:0000786	nucleosome	1	AT1G09200,AT5G65360
GO:0006810	transport	1	AT4G13510,AT4G00430,AT1G11260,AT4G36670,AT5G05010,AT5G13490,AT2G22500,AT4G01100
GO:0010119	regulation of stomatal movement	1	AT2G18960,AT1G25490
GO:0016310	phosphorylation	1	AT4G01370
GO:0010310	regulation of hydrogen peroxide metabolic process	1	AT3G52430
GO:0050311	sulfite reductase (ferredoxin) activity	1	AT5G04590
GO:0016629	12-oxophytodienoate reductase activity	1	AT2G06050
GO:0009407	toxin catabolic process	1	AT2G29450,AT2G29420,AT2G29460
GO:0006855	multidrug transport	1	AT1G59870
GO:0004124	cysteine synthase activity	1	AT3G61440
GO:0006950	response to stress	1	AT3G50970,AT1G19670,AT4G01370
GO:0009524	phragmoplast	1	AT1G75950
GO:0016836	hydro-lyase activity	1	AT5G42650
GO:0005829	cytosol	1	AT5G27380,AT1G77760,AT1G79550,AT3G09440,AT1G45145,AT1G08830,AT5G02490
GO:0016998	cell wall catabolic process	1	AT4G01700,AT2G43570,AT2G17120
GO:0045910	negative regulation of DNA recombination	1	AT1G75950
GO:0006809	nitric oxide biosynthetic process	1	AT1G77760
GO:0010319	stromule	1	AT5G04590
GO:0016020	membrane	1	AT3G19930,AT1G71880,AT4G39030,AT4G13510,AT2G34250,AT4G00430,AT1G11260,AT4G35180,AT4G11840,AT4G36670,AT4G32530,AT4G38250,AT3G50970,AT5G46050,AT2G25110,AT2G15390,AT2G16510,AT1G12110,AT3G47960,AT1G32210,AT1G08930,AT2G18960,AT2G44490
GO:0009846	pollen germination	1	AT1G71880
GO:0046470	phosphatidylcholine metabolic process	1	AT4G11840
GO:0007067	mitosis	1	AT1G75950
GO:0019005	SCF ubiquitin ligase complex	1	AT1G75950
GO:0045271	respiratory chain complex I	1	AT4G34700,AT4G02580,AT5G66510
GO:0010197	polar nucleus fusion	1	AT4G33050
GO:0015297	antiporter activity	1	AT4G39030
GO:0010266	response to vitamin B1	1	AT2G14610
GO:0005792	microsome	1	AT5G61790,AT3G26830
GO:0010009	external side of endosome membrane	1	AT3G54840
GO:0010167	response to nitrate	1	AT5G50200,AT1G12110
GO:0016615	malate dehydrogenase activity	1	AT1G04410
GO:0019344	cysteine biosynthetic process	1	AT3G61440
GO:0019575	sucrose catabolic process, using beta-fructofuranosidase	1	AT1G62660
GO:0009567	double fertilization forming a zygote and endosperm	1	AT2G47470
GO:0015706	nitrate transport	1	AT5G50200,AT1G12110
GO:0045309	protein phosphorylated amino acid binding	1	AT3G02520
GO:0005575	cellular_component	1	AT2G40140,AT4G37990,AT5G39670,AT5G44070,AT1G04410,AT4G34230,AT1G15670,AT4G15610,AT5G08240,AT1G51680,AT2G39980,AT3G52430,AT2G38870,AT5G52760,AT2G05940,AT4G15490,AT4G24290,AT1G19670,AT2G03760,AT1G68620,AT4G33050,AT2G40000,AT2G23090,AT2G47180,AT2G33380,AT4G25030,AT1G80460,AT1G02450,AT1G80830,AT2G32150,AT2G25670,AT1G28480,AT2G36880,AT2G36950,AT1G62480,AT4G20780,AT2G37970,AT3G28930,AT2G14560
GO:0030131	clathrin adaptor complex	1	AT5G05010
GO:0005618	cell wall	1	AT5G44420,AT5G57560,AT5G64120,AT4G02330
GO:0009700	indole phytoalexin biosynthetic process	1	AT3G26830
GO:0005471	ATP:ADP antiporter activity	1	AT5G13490
GO:0016604	nuclear body	1	AT3G15210
GO:0042128	nitrate assimilation	1	AT1G77760
GO:0015086	cadmium ion transmembrane transporter activity	1	AT1G59870
GO:0031540	regulation of anthocyanin biosynthetic process	1	AT1G75040
GO:0045022	early endosome to late endosome transport	1	AT3G54840
GO:0005635	nuclear envelope	1	AT5G47120,AT3G02520
GO:0015865	purine nucleotide transport	1	AT5G13490
GO:0005749	mitochondrial respiratory chain complex II	1	AT5G66760
GO:0015992	proton transport	1	AT2G18960
GO:0019373	epoxygenase P450 pathway	1	AT5G42650
GO:0019761	glucosinolate biosynthetic process	1	AT2G22330
GO:0008219	cell death	1	AT1G11310,AT2G39200
GO:0046872	metal ion binding	1	AT5G52760,AT2G36950,AT5G60800
GO:0009116	nucleoside metabolic process	1	AT4G24350
GO:0004363	glutathione synthase activity	1	AT5G27380
GO:0006118	electron transport	1	AT5G04590,AT3G48890,AT5G20230,AT5G15350,AT3G22370,AT1G28480
GO:0009926	auxin polar transport	1	AT1G25490
GO:0008474	palmitoyl-(protein) hydrolase activity	1	AT4G17470
GO:0046685	response to arsenic	1	AT5G52640,AT5G44070,AT4G33540
GO:0046938	phytochelatin biosynthetic process	1	AT5G44070
GO:0015144	carbohydrate transmembrane transporter activity	1	AT3G19930,AT1G71880,AT1G11260,AT4G36670,AT1G08930
GO:0005622	intracellular	1	AT4G02080,AT2G31380,AT5G04340
GO:0006334	nucleosome assembly	1	AT1G09200,AT5G65360
GO:0009853	photorespiration	1	AT4G34700,AT5G66510
GO:0005524	ATP binding	1	AT5G52640,AT1G09970,AT3G09440,AT3G28540,AT5G02490
GO:0008146	sulfotransferase activity	1	AT2G03760
GO:0006121	mitochondrial electron transport, succinate to ubiquinone	1	AT5G66760
GO:0015696	ammonium transport	1	AT4G13510
GO:0042254	ribosome biogenesis	1	AT2G37190
GO:0007169	transmembrane receptor protein tyrosine kinase signaling pathway	1	AT1G09970
GO:0009815	1-aminocyclopropane-1-carboxylate oxidase activity	1	AT1G05010
GO:0008909	isochorismate synthase activity	1	AT1G74710
GO:0009850	auxin metabolic process	1	AT3G02875,AT1G44350
GO:0016844	strictosidine synthase activity	1	AT1G74020
GO:0015250	water channel activity	1	AT4G00430
GO:0008519	ammonium transmembrane transporter activity	1	AT4G13510
GO:0009535	chloroplast thylakoid membrane	1	AT5G42650,AT3G48890
GO:0008601	protein phosphatase type 2A regulator activity	1	AT1G13320,AT1G25490
GO:0048316	seed development	1	AT5G43940
GO:0031224	intrinsic to membrane	1	AT4G16890
GO:0006075	1,3-beta-glucan biosynthetic process	1	AT4G03550
GO:0015103	inorganic anion transmembrane transporter activity	1	AT1G80830
GO:0046873	metal ion transmembrane transporter activity	1	AT1G80830
GO:0006865	amino acid transport	1	AT4G35180,AT4G38250
GO:0003988	acetyl-CoA C-acyltransferase activity	1	AT2G33150
GO:0004449	isocitrate dehydrogenase (NAD+) activity	1	AT4G35260
GO:0006461	protein complex assembly	1	AT5G05010
GO:0004784	superoxide dismutase activity	1	AT1G08830
GO:0006916	anti-apoptosis	1	AT5G47120,AT1G32210
GO:0016207	4-coumarate-CoA ligase activity	1	AT1G51680
GO:0015770	sucrose transport	1	AT3G19930
GO:0016597	amino acid binding	1	AT4G34200
GO:0009117	nucleotide metabolic process	1	AT5G63400
GO:0008137	NADH dehydrogenase (ubiquinone) activity	1	AT4G02580
GO:0008940	nitrate reductase activity	1	AT1G77760
GO:0050691	regulation of defense response to virus by host	1	AT4G31800
GO:0003674	molecular_function	1	AT2G18690,AT1G15670,AT5G44420,AT1G80040,AT1G65500,AT4G15610,AT5G08240,AT3G50970,AT1G35230,AT4G24290,AT4G22920,AT2G25110,AT2G40000,AT2G28400,AT4G02380,AT2G23090,AT4G25030,AT2G14610,AT2G37130,AT1G27100,AT1G32210,AT5G06320,AT2G25670,AT4G22750,AT2G17120,AT3G13950,AT1G67360,AT3G28930,AT2G14560,AT1G75040
GO:0006120	mitochondrial electron transport, NADH to ubiquinone	1	AT4G02580
GO:0006511	ubiquitin-dependent protein catabolic process	1	AT5G42790,AT5G58290,AT1G75950
GO:0010375	stomatal complex patterning	1	AT1G51660
GO:0051258	protein polymerization	1	AT4G13510
GO:0031966	mitochondrial membrane	1	AT4G34700,AT5G66510
GO:0006879	cellular iron ion homeostasis	1	AT5G01600
GO:0004034	aldose 1-epimerase activity	1	AT4G25900
GO:0016004	phospholipase activator activity	1	AT2G47170
GO:0019419	sulfate reduction	1	AT5G04590
GO:0016756	glutathione gamma-glutamylcysteinyltransferase activity	1	AT5G44070
GO:0005740	mitochondrial envelope	1	AT2G36530,AT5G13490
GO:0016616	oxidoreductase activity, acting on the CH-OH group of donors, NAD or NADP as acceptor	1	AT4G34200
GO:0005525	GTP binding	1	AT4G02080,AT1G33960,AT2G47170,AT3G54840
GO:0005384	manganese ion transmembrane transporter activity	1	AT1G80830
GO:0006944	membrane fusion	1	AT3G52400,AT3G11820
GO:0012505	endomembrane system	1	AT1G74020,AT2G18690,AT4G02080,AT4G12470,AT4G12480,AT1G09970,AT3G54420,AT5G50200,AT5G57220,AT4G17470,AT3G13790,AT1G65500,AT5G24160,AT1G61810,AT2G31380,AT2G34810,AT2G19190,AT4G01700,AT3G57240,AT4G23150,AT3G11340,AT3G04720,AT3G05200,AT2G15390,AT2G16510,AT4G02330,AT2G43570,AT2G43510,AT4G26400,AT2G37130,AT3G57260,AT2G43620,AT4G24350,AT4G22750,AT1G44350,AT1G67360,AT1G75040
GO:0010112	regulation of systemic acquired resistance	1	AT1G02450
GO:0005819	spindle	1	AT1G75950
GO:0045333	cellular respiration	1	AT3G22370
GO:0010287	plastoglobule	1	AT5G42650
GO:0005351	sugar:hydrogen symporter activity	1	AT3G19930,AT1G71880,AT1G11260,AT4G36670,AT1G08930
GO:0006108	malate metabolic process	1	AT1G04410
GO:0006012	galactose metabolic process	1	AT4G25900

[truncated: 1 more sheets: Wang GO terms Induced]
